# Supplementary material for: Generating detailed intercellular communication patterns in psoriasis at the single-cell level using social networking, pattern recognition, and manifold learning methods to optimize treatment strategies
Source: PubMed Central journal article supplement (PMC10911347; doi:10.18632/aging.205478), 2024-01-29

**Supplementary Table 10. Proportion of target genes for cell type specific regulators (CTSRs) detected in psoriasis and healthy skin pathology tissue sections.**

| Detection status                          | proportion           | Target genes of cell type specific regulators (CTSRs)                                                                                                                                                                                                                                                                                                                                                                                                                                                                                                                                                                                                                                                                                                                                                                                                                                                                                                                                                                                                                                                                                                                                                                                                                                                                                                                                                                                                                                                                                                                                                                                                                                                                                                                                                                                                                                                                                                                                                                                                                                                                                                                                                                                                                                                                                                                                                                                                                                                                                                                                                                                                                                                                                                                                                                                                                                                                                                                                                                                                                                                                                                                                                                                                                                                                                                                                                                       |
|-------------------------------------------|----------------------|-----------------------------------------------------------------------------------------------------------------------------------------------------------------------------------------------------------------------------------------------------------------------------------------------------------------------------------------------------------------------------------------------------------------------------------------------------------------------------------------------------------------------------------------------------------------------------------------------------------------------------------------------------------------------------------------------------------------------------------------------------------------------------------------------------------------------------------------------------------------------------------------------------------------------------------------------------------------------------------------------------------------------------------------------------------------------------------------------------------------------------------------------------------------------------------------------------------------------------------------------------------------------------------------------------------------------------------------------------------------------------------------------------------------------------------------------------------------------------------------------------------------------------------------------------------------------------------------------------------------------------------------------------------------------------------------------------------------------------------------------------------------------------------------------------------------------------------------------------------------------------------------------------------------------------------------------------------------------------------------------------------------------------------------------------------------------------------------------------------------------------------------------------------------------------------------------------------------------------------------------------------------------------------------------------------------------------------------------------------------------------------------------------------------------------------------------------------------------------------------------------------------------------------------------------------------------------------------------------------------------------------------------------------------------------------------------------------------------------------------------------------------------------------------------------------------------------------------------------------------------------------------------------------------------------------------------------------------------------------------------------------------------------------------------------------------------------------------------------------------------------------------------------------------------------------------------------------------------------------------------------------------------------------------------------------------------------------------------------------------------------------------------------------------------------|
| Detectable proteins in pathology sections | 674 (674/839, 80.3%) | <p>TPM4, WDR1, RPL29, TPM1, TMSB4X, UBQLN1, YME1L1, PTBP3, RPL23, CCT3, PTPRF, PTBP1, RPS27A, SMARCC1, TPR, OSBPL8, RAB31, RPS12, SKP1, SUCLG1, PSMD1, RAC1, RPL8, RPL36, PSMD2, RPL12, RPL10A, RPL10, SH3BGRL3, YY1, UBE2K, TXN, PTMA, PUF60, RAB10, RSL1D1, RPL34, SEC62, USP15, NAA50, CYB5R3, PPIG, RPL27A, RPL28, VAMP8, RIOK3, RPL37A, RPL5, AHCY, SYNGR2, SPTBN1, VPS26A, VIM, PLS3, RPN2, HNRNPAB, SNRPD2, SFPQ, SLPI, RPL32, SERF2, RPS14, S100A14, SUB1, TCP1, TGOLN2, CCT2, STAT1, RANGAP1, RAD23B, PRNP, SBSN, SOD2, SET, TXNDC17, TYMP, PSMB7, RPL26, RPL4, ROCK2, UTRN, VWF, XRCC6, RPL6, TPM3, ATP6V1F, ATP6V1G1, OS9, PSMA6, RPL30, RPLP2, UQCR10, SON, RAB34, REEP5, RHOA, RHOC, RPL14, RPL13A, RPL39, POLR2L, POLR1D, MRPL12, SSR4, CCT8, XRCC5, RRBPI, RPS19, RPS16, RPS28, SRP72, SRP14, TERF2IP, NDUFS5, TM9SF3, PSMD7, RPL24, RPL31, TPSAB1, RPLP0, TRIM29, RPS13, RPS15A, YBX3, RPS21, S100A16, CCT5, TUBB2A, UBXN1, ZFP36, ZC3H15, UBXN4, TIMM13, TUBB4B, TXNIP, ZNF207, ZNF385A, VDAC1, RPS3, SLK, TIMP1, THY1, USP47, WNK1, PCOLCE, PLVAP, PSMB5, RPL36AL, SPARC, ZBTB20, HDLBP, RBM25, UBL5, WAC, ZFP91, YWHAB, YWHAQ, ACTG1, CBR1, CCDC80, CD93, ANGPTL2, COL5A1, COL6A3, BTF3, BAG1, BICD2, CYB5A, DCTN3, CAV1, CAPZB, DEK, DDX21, DDX3X, CFH, CD63, COX5A, EGFR, NT5E, HSPE1, AP2S1, ATP1A1, ANXA2, CTSG, PSIP1, CLTA, HSPA5, CALR, DAB2, CDH11, CHD4, COX7C, DPYSL3, EIF1, EEF2, IFI16, CAPRIN1, CKAP4, CNBP, COL1A2, EDF1, CTNBN1, G3BP1, DSTN, HADHA, ECHS1, GSN, BAIAP2, SLC25A5, CAPG, CPD, CPA3, ARPC5, COL1A1, CSDE1, TMBIM6, BRK1, CYBRD1, CALD1, CALU, COL4A1, GSPT1, FUS, FTL, DBI, GOT2, AKAP13, PYCARD, CRTAP, COPS6, COX5B, COX6C, BCAP31, BAG3, CAP1, C1S, COX7A2, A2M, ABLIM1, YWHAZ, CTSK, CD44, CLUH, CFL1, CSTA, GRN, HMGCS1, HMGA1, AHNAK, APRT, ACTR3, ARPC2, EPB41L2, DSC2, EBNA1BP2, DSC3, DYNC1H1, EIF3M, GPNMB, EEA1, CSTB, GGCT, ARHGDI, ENO1, EIF3D, GUK1, PKM, HSPA9, ALDOA, CAPN1, ARL8B, ANP32B, ACTR2, ARPC5L, CNN3, COL18A1, CCAR1, DDX1, CST3, SFN, DEGS1, SDF4, CD99, EI24, CTNNA1, COX6B1, GBP2, FAM162A, ENSA, GSTP1, YWHAG, APP, ALDH2, ALDH3A2, AKR1B10, AQP3, ANXA1, ATP2A2, CCDC50, CHMP2A, CD9, COX4I1, CYCS, GNG12, GNG11, ITGA6, AEBP1, ANXA5, SYNCRIP, EIF5, EIF6, LRP1, MAN1A1, METAP1, MBD2, LAMC1, LAMP2, KTN1, MDH2, MAL2, NCL, MYL12B, CD59, CD81, CLTB, COL3A1, COL5A2, CLIC4, COL6A1, COL6A2, FBLN2, GLG1, HSPH1, HSPA4L, HNRNPF, PPA1, IQGAP1, IMPDH2, LYPD3, MTDH, LUM, MAPK13, CDC42, EZR, ILF2, EIF4A3, EIF5B, EIF4B, SERPING1, CD74, MAP7D1, LY6D, MGLL, MFAP4, FDPS, GHITM, EIF2S1, GNG5, HSP90AB1, HNRNPC, HNRNPU, LRRFIP1, IDH2, IDI1, MBNL1, EIF4A1, IGFBP7, LAMB1, KRTDAP, CLU, DSG1, DSG3, CLCA2, DDX17, EIF3B, EEF1A1, FGFBP1, PERP, NDUFB9, NDUFB10, NHP2, CALM1, CEBPD, CIRBP, DYNLL1, COL15A1, CYC1, CTR9, FLNA, ETF1, ESRP1, FSTL1, HSD17B10, HTRA1, MSN, DRAP1, NDUFB4, SLC25A6, GJA1, CDH1, DDX5, DSP, DIAPH1, ENAH, TUFM, FMOD, FBN1, FBLN1, LAMA4, RPS6KB2, FTH1, LGALS3, LPAR1, NFIX, NNMT, NUCKS1, NAA15, CALML3, CTSD, DNAJA1, EIF3J, EIF3I, ITM2B, PDAP1, CCDC47, ATP1B3, HSPD1, DHCR24, EIF3H, GLUL, GNA15, GNAI2, GLTP, SLC2A1, HEBP2, HNRNPD, KHDRBS1, HSPA8, IFITM3, EIF2S2, NFKBIA, HK1, MMP2, AK2, LAD1, NSA2, NPM1, OLFML3, OPTN, ENG, EIF3E, EIF3L, VCAN, DAD1, DNAJB1, EIF3A, HSP90B1, ITGA5, KRT1, SERBP1, PDLIM1, IGFBP4, MCL1, MATR3, EIF4G2, MARCKS, MX1, JUP, PPP1CA, PPP1CB, PSMA4, GPX4, LAMP1,</p> |

HSP90AA1, KPNB1, JUNB, JUND, ITGB5, PARK7, PALLD, PLP2, HINT1, NDUFS7, NME1, NDRG1, NOLC1, NDUFA4, NDUFA10, MYL6, IMPA2, LGALS3BP, SLC16A10, PRDX1, PRDX5, NRP1, RBM3, P4HB, PDIA3, PDIA6, PSMC5, PSMB1, HSPA4, NACA, PA2G4, PGRMC1, PDGFRB, PEA15, UQCRQ, C6orf132, CHCHD2, CD82, GAPDH, HDGF, HNRNPDL, IL6ST, ITGB1, PSMC2, CSNK1A1, LGALS1, HNRNPK, PAFAH1B1, KLF5, MXRA5, NDUFV1, PSMB6, RBM39, GOLGA4, NDUFA13, PAPOLA, DCN, SFRP2, SLIT3, SNRPD3, TOLLIP, SRSF11, DNTTIP2, GLO1, MACF1, PFDN5, PABPC1, PRPF40A, RAD21, RAB1A, RAB25, RPL27, RPL38, S100A4, S100A6, S100A7, S100A8, S100A9, S100A10, S100A11, SAP18, SEC61B, PTP4A2, FAM114A1, RPL22, RPL23A, RPS23, RPS24, SNRPB, MRPS34, PKP3, PSMA3, PPIB, UQCRH, CRABP2, MRPL27, RPL13, PSMD8, HNRNPA2B1, RPS6, PTGES3, SNX9, SRGN, TPI1, RPL19, SF3B1, RPS15, CCT6A, TAF7, PCBP2, PKP1, SEC31A, TUBA4A, SRSF3, STK24, U2SURP, RPS5, TALDO1, TAGLN2, GM2A, SDC1, AHCYL1, NAPA, TMEM45A, TIMM8B, SPINT2, STAT3, SWAP70, GNB1, GDI2, CAST, EIF4G1, PSMA7, RAB3D, RPS29, HSPB1, MYH9, NCKAP1, HSPG2, PRRC2C, HNRNPM, NDUFS6, METAP2, MAP4, UQCRB, RAB7A, RPL18, RPL1, RPL3, RRAGC, SOD1, SH3GLB1, RPS20, RPS11, SERPINB4, TMEM245, TMED3, PCBP1, PPL, PHB2, RPL11, PSMC3, RPL15, TUBA1C, SRSF2, TMED9, MZT2B, RPS8, RPS2, RPSA, TACC1, TACSTD2, VCP, SERPINB5, SPCS1, MSMO1, PEBP1, PGK1, NOP58, RPL35, NDUFB7, PMVK, PPP3CA, PLEKHO2, PLIN3, PLXND1, ARHGAP18, PRRX1, RPS7, FAU, RTN4, SYNE2, LTBP1, MPZL2, SLC25A3, RAN, PFN1, PSMB4, PPIA, RPL35A, STOM

EPAS1, TCF4, TGFB2, TM4SF1, EMP1, NUAK1, EMCN, ETS2, SPARCL1, ATP8B1, EVA1C, HIPK3, OLFM1, CAV2, PIK3C2A, SNRK, TSC22D1, TNFRSF10D, ETS1, RALGAPA2, ATF4, CDKN1A, FOXP1, ITM2A, PRKCH, PTTG1IP, BMPR2, ECE1, FLT1, PRSS23, WWTR1, CCNI, IFITM2, JAK1, SH3BP5, ADAMTSL4-AS1, DUSP6, APLP2, ARID5B, ATF3, EID1, FOS, GADD45B, IER5, RHOB, RPL37, ZFP36L1, ZFP36L2, CRISPLD2, APCDD1, TIMP2, F2R, LAPTM4A, ACTB, FGFR1, IL1R1, PMP22, TMEM176B, DDR2, PAM, NUPR1, PLAC9, SERINC1, ANTXR1, ID2, REV3L, NR4A1, ARRDC3, AKAP9, ARF1, DMKN, FXYD3, SNHG5, TSPO, ZFAS1, C4orf3, KRT10, KRT6A, SCD, EMP2, SPTSSA, MAFB, CA12, KRT16, NRARP, NSG1, COX8A, DUSP1, EGR1, IER2, OST4, SLC39A6, TMEM123, RHOV, CALM2, GADD45GIP1, MAF, RALBP1, UBE2D3, EHF, GJB2, BHLHE40, COX6A1, COX7B, EFNA1, MAPK6, MRFAP1, RND3, SNHG8, CAMLG, NFE2L2, PTP4A1, RAB11A, TOMM20, C19orf33, C1orf21, KLF4, NDUFB2, PYURF, SERP1, BPTF, NFE2L1, ALDH3B2, C11orf58, C1orf43, MRPL51, NDUFA1, POMP, PPP2CA, ROMO1, SLC25A39, TOMM7, MYL12A, RORA, MXD1, SPPL3, ANKRD12, AURKAIP1, FOSB, GAS5, PNRC1, PDPF, RNF11, RSRC2, SLC38A2, TMEM154, TNFAIP3, ZC3H12A, ZDHHC3, SCAF11, SCO2, BMP2K, KIT, LAPTM5, BTG1, MALAT1, OAZ1, JUN, PPP1R15A, UBA52, UBB, UBC, KLF6, SLU7, NFKBIZ

Undetectable  
proteins at the  
pathology  
sections

165 (165/839, 19.7%)

**Supplementary Table 11. KEGG pathway enrichment analysis of Q1 protein in psoriasis pathology tissue sections.**

| KEGG pathway                                        | Mapping | Background | All mapping | All background | Fold enrichment | Fisher's exact test p-value | $-\log_{10}$ (p-value) | Related proteins                                                                                                                                                                 |
|-----------------------------------------------------|---------|------------|-------------|----------------|-----------------|-----------------------------|------------------------|----------------------------------------------------------------------------------------------------------------------------------------------------------------------------------|
| hsa04610<br>Complement and coagulation cascades     | 21      | 64         | 149         | 2834           | 6.24            | 2.02707152308558E-12        | 11.69                  | P00747 P04004<br>P13671 P01024<br>P08697 P00742<br>P04003 P0C0L5<br>P02679 P03952<br>P10909 P02748<br>P07357 P02675<br>P08174 P02671<br>P00748 P05154<br>P05546 P01042<br>P00734 |
| hsa05143<br>African trypanosomiasis                 | 5       | 14         | 149         | 2834           | 6.79            | 0.000511397243201717        | 3.29                   | P69905 P02647<br>P50148 P68871<br>P01042                                                                                                                                         |
| hsa03320<br>PPAR signaling pathway                  | 7       | 38         | 149         | 2834           | 3.5             | 0.00306959200311731         | 2.51                   | Q9BX66 Q99541<br>P23786 P02647<br>P02652 O15540<br>O60240                                                                                                                        |
| hsa00860<br>Porphyrin metabolism                    | 4       | 15         | 149         | 2834           | 5.07            | 0.00635633605691733         | 2.2                    | P00450 P13716<br>P30519 P30043                                                                                                                                                   |
| hsa04080<br>Neuroactive ligand-receptor interaction | 4       | 16         | 149         | 2834           | 4.76            | 0.00813377948573137         | 2.09                   | P00747 P01024<br>P01042 P00734                                                                                                                                                   |
| hsa00340<br>Histidine metabolism                    | 3       | 13         | 149         | 2834           | 4.39            | 0.0276072194693599          | 1.56                   | P43353 P21397<br>P30837                                                                                                                                                          |
| hsa00910<br>Nitrogen metabolism                     | 2       | 6          | 149         | 2834           | 6.34            | 0.0358187358419433          | 1.45                   | P00915 P00918                                                                                                                                                                    |
| hsa04371<br>Apelin signaling pathway                | 7       | 61         | 149         | 2834           | 2.18            | 0.0387258116740504          | 1.41                   | P10301 Q15796<br>P62879 P61952<br>Q14344 P50148<br>O60240                                                                                                                        |
| hsa05310<br>Asthma                                  | 3       | 15         | 149         | 2834           | 3.8             | 0.0406756033570966          | 1.39                   | P13727 P11678<br>P30273                                                                                                                                                          |
| hsa05150<br>Staphylococcus aureus infection         | 6       | 50         | 149         | 2834           | 2.28            | 0.0448414576181837          | 1.35                   | P00747 P01024<br>P0C0L5 P12314<br>P02679 Q92764                                                                                                                                  |
| hsa04978<br>Mineral absorption                      | 3       | 16         | 149         | 2834           | 3.57            | 0.0481852550196982          | 1.32                   | P02787 Q53TN4<br>P30519                                                                                                                                                          |

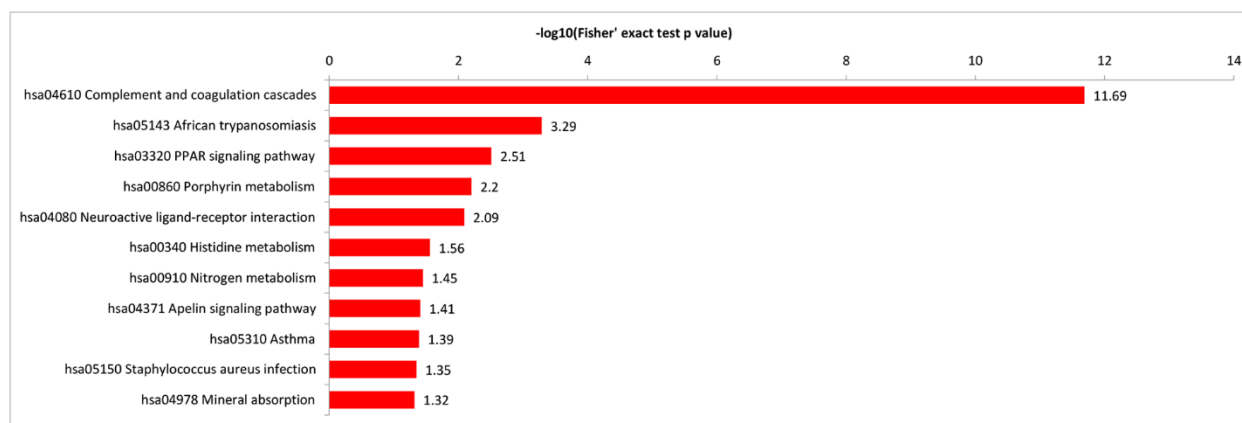

**Supplementary Table 12. KEGG pathway enrichment analysis of Q2 protein in psoriasis pathology tissue sections.**

| KEGG pathway                                            | Mapping | Background | All mapping | All background | Fold enrichment | Fisher's exact test p-value | -log10 (p-value) | Related proteins                                               |
|---------------------------------------------------------|---------|------------|-------------|----------------|-----------------|-----------------------------|------------------|----------------------------------------------------------------|
| hsa04510 Focal adhesion                                 | 9       | 108        | 73          | 2834           | 3.24            | 0.00152731665240096         | 2.82             | O75116 P49746 Q03135 Q05397 O75369 Q14315 P46108 Q13418 P27361 |
| hsa04012 ErbB signaling pathway                         | 5       | 41         | 73          | 2834           | 4.73            | 0.00359370028970315         | 2.44             | P42229 Q05397 P46108 P27361 Q13557                             |
| hsa05150 Staphylococcus aureus infection                | 5       | 50         | 73          | 2834           | 3.88            | 0.0084905104569172          | 2.07             | P09871 P02747 P28067 P05156 P19012                             |
| hsa05322 Systemic lupus erythematosus                   | 5       | 52         | 73          | 2834           | 3.73            | 0.0100084069452076          | 2                | P09871 P02747 P28067 Q16778 P19474                             |
| hsa04658 Th1 and Th2 cell differentiation               | 4       | 36         | 73          | 2834           | 4.31            | 0.0128006221416951          | 1.89             | P42229 P28067 P27361 P42226                                    |
| hsa05220 Chronic myeloid leukemia                       | 4       | 38         | 73          | 2834           | 4.09            | 0.0154332453003611          | 1.81             | P42229 Q92466 P46108 P27361                                    |
| hsa03320 PPAR signaling pathway                         | 4       | 38         | 73          | 2834           | 4.09            | 0.0154332453003611          | 1.81             | P33121 P02656 Q13418 Q96Q06                                    |
| hsa04360 Axon guidance                                  | 5       | 58         | 73          | 2834           | 3.35            | 0.0156627070676531          | 1.81             | O75116 Q05397 Q13418 P27361 Q13557                             |
| hsa05205 Proteoglycans in cancer                        | 7       | 105        | 73          | 2834           | 2.59            | 0.0170927890779721          | 1.77             | O75116 Q03135 Q05397 O75369 Q14315 P27361 Q13557               |
| hsa04610 Complement and coagulation cascades            | 5       | 64         | 73          | 2834           | 3.03            | 0.0231418008993157          | 1.64             | P09871 P02747 P01008 P05155 P05156                             |
| hsa05133 Pertussis                                      | 4       | 43         | 73          | 2834           | 3.61            | 0.023434380351256           | 1.63             | P09871 P02747 P05155 P27361                                    |
| hsa05213 Endometrial cancer                             | 3       | 25         | 73          | 2834           | 4.66            | 0.0251186449158574          | 1.6              | Q92466 Q13418 P27361                                           |
| hsa04659 Th17 cell differentiation                      | 4       | 44         | 73          | 2834           | 3.53            | 0.0252873210209065          | 1.6              | P42229 P28067 P27361 P42226                                    |
| hsa05161 Hepatitis B                                    | 5       | 66         | 73          | 2834           | 2.94            | 0.0260736942665817          | 1.58             | P42229 Q92466 Q7Z434 P27361 P42226                             |
| hsa04935 Growth hormone synthesis, secretion and action | 4       | 48         | 73          | 2834           | 3.24            | 0.0335697440257818          | 1.47             | P42229 Q05397 P46108 P27361                                    |
| hsa00790 Folate biosynthesis                            | 2       | 12         | 73          | 2834           | 6.47            | 0.0365577557963611          | 1.44             | P35270 Q9NQX3                                                  |
| hsa04261 Adrenergic signaling in cardiomyocytes         | 4       | 50         | 73          | 2834           | 3.11            | 0.0382408441834425          | 1.42             | P09493 Q93084 P27361 Q13557                                    |
| hsa04062 Chemokine signaling pathway                    | 5       | 74         | 73          | 2834           | 2.62            | 0.0401396137908071          | 1.4              | O75116 Q05397 P46108 P27361 Q8TCU6                             |
| hsa04217 Necroptosis                                    | 5       | 75         | 73          | 2834           | 2.59            | 0.0421690998597402          | 1.38             | P42229 Q96EP0 P06737 Q13557 P42226                             |

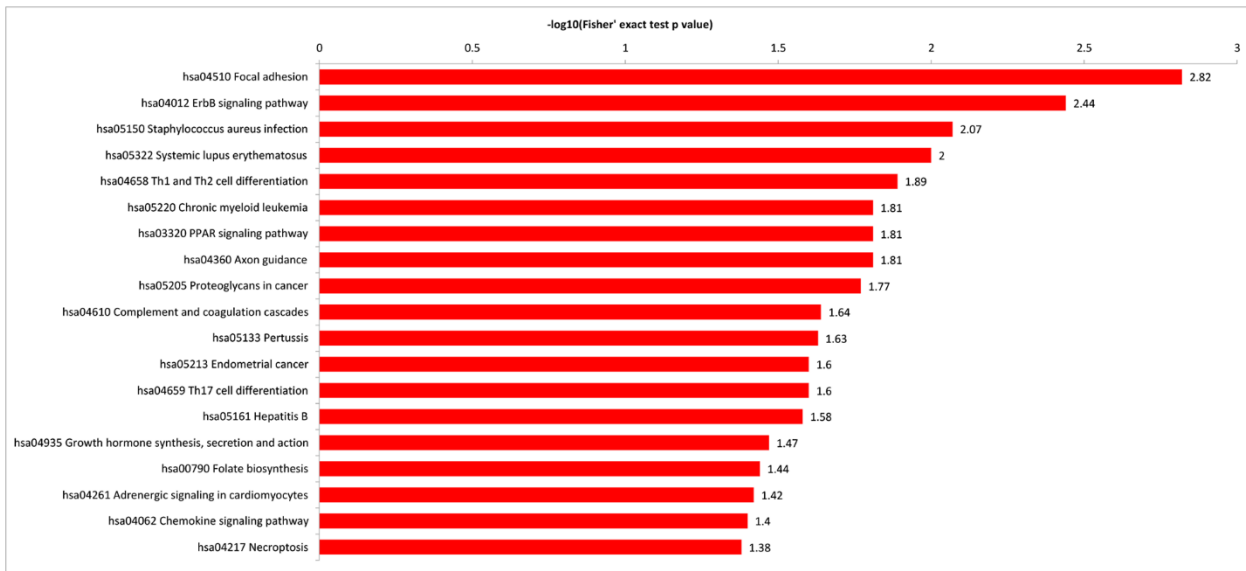

**Supplementary Table 13. KEGG pathway enrichment analysis of Q3 protein in psoriasis pathology tissue sections.**

| KEGG pathway                                       | Mapping | Background | All mapping | All background | Fold enrichment | Fisher's exact test p-value | -log10 (p-value) | Related proteins                                                                                                                                                                                                                                                     |
|----------------------------------------------------|---------|------------|-------------|----------------|-----------------|-----------------------------|------------------|----------------------------------------------------------------------------------------------------------------------------------------------------------------------------------------------------------------------------------------------------------------------|
| hsa03010<br>Ribosome                               | 31      | 106        | 172         | 2834           | 4.82            | 1.59332166405189E-14        | 13.8             | P62829 P30050 P62906<br>P46776 P08708 P62701<br>P82932 P62424 P22090<br>Q02878 P62888 P05387<br>P62249 P62857 P83731<br>P18124 P05388 P62277<br>P62244 P61353 P63173<br>P62750 P62847 P84098<br>P46782 P62851 Q07020<br>P60866 P62913 P61313<br>P18077               |
| hsa05171<br>Coronavirus disease - COVID-19         | 33      | 155        | 172         | 2834           | 3.51            | 3.80877076730991E-11        | 10.42            | P62829 P30050 P62906<br>Q99836 P46776 P08708<br>P62701 P62424 P22090<br>Q02878 P62888 P05387<br>P62249 P62857 P83731<br>P18124 P05388 P62277<br>P62244 O95786 P61353<br>P63173 P62750 P62847<br>P84098 P46782 P62851<br>P40763 Q07020 P60866<br>P62913 P61313 P18077 |
| hsa03015 mRNA surveillance pathway                 | 9       | 58         | 172         | 2834           | 2.56            | 0.00729283044126032         | 2.14             | Q13310 Q9UKF6 P35637<br>O43809 P62495 Q86U42<br>P62136 P51003 Q86V81                                                                                                                                                                                                 |
| hsa00760<br>Nicotinate and nicotinamide metabolism | 4       | 16         | 172         | 2834           | 4.12            | 0.0134076491169586          | 1.87             | P00491 P49902 Q06278<br>P43490                                                                                                                                                                                                                                       |
| hsa00970<br>Aminoacyl-tRNA biosynthesis            | 5       | 27         | 172         | 2834           | 3.05            | 0.0210625411587651          | 1.68             | Q9Y285 Q15046 P12081<br>P26639 P49591                                                                                                                                                                                                                                |
| hsa03040<br>Spliceosome                            | 13      | 117        | 172         | 2834           | 1.83            | 0.0279485728569399          | 1.55             | Q9BWJ5 O14776 Q9Y2W2<br>Q86XP3 P35637 P55769<br>O60828 Q86V81 P62304<br>P09651 O15042 Q96FV9<br>Q9Y3C6                                                                                                                                                               |
| hsa00750 Vitamin B6 metabolism                     | 2       | 5          | 172         | 2834           | 6.59            | 0.0324291844550689          | 1.49             | Q9Y617 Q06278                                                                                                                                                                                                                                                        |
| hsa03050<br>Proteasome                             | 6       | 41         | 172         | 2834           | 2.41            | 0.0349861796654851          | 1.46             | Q9UL46 P51665 Q06323<br>P62195 O14818 O00487                                                                                                                                                                                                                         |
| hsa03008<br>Ribosome biogenesis in eukaryotes      | 7       | 52         | 172         | 2834           | 2.22            | 0.0354229688789109          | 1.45             | Q8NI36 Q9Y3A5 Q8IWA0<br>Q8N5L8 Q9H0D6 P55769<br>P62826                                                                                                                                                                                                               |
| hsa00240<br>Pyrimidine metabolism                  | 5       | 33         | 172         | 2834           | 2.5             | 0.0462387361397857          | 1.33             | P00491 P19971 P49902<br>Q9H773 P15531                                                                                                                                                                                                                                |
| hsa04623<br>Cytosolic DNA-sensing pathway          | 4       | 23         | 172         | 2834           | 2.87            | 0.0468842339601234          | 1.33             | P62875 O95786 Q9ULZ3<br>Q14116                                                                                                                                                                                                                                       |

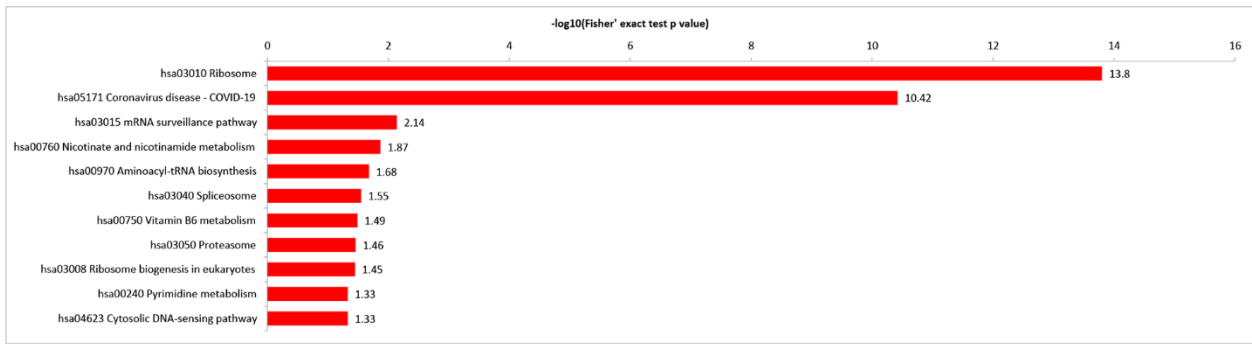

**Supplementary Table 14. KEGG pathway enrichment analysis of Q4 protein in psoriasis pathology tissue sections.**

| KEGG pathway                                    | Mapping | Background | All mapping | All background | Fold enrichment | Fisher's exact test p-value | -log10 (p-value) | Related proteins                                                                                                                                                                                                                                                                                                                                                |
|-------------------------------------------------|---------|------------|-------------|----------------|-----------------|-----------------------------|------------------|-----------------------------------------------------------------------------------------------------------------------------------------------------------------------------------------------------------------------------------------------------------------------------------------------------------------------------------------------------------------|
| hsa03008 Ribosome biogenesis in eukaryotes      | 11      | 52         | 101         | 2834           | 5.94            | 1.21977150331164E-06        | 5.91             | Q9UBU9<br>Q969X6 Q15061<br>Q8TED0<br>O60832<br>Q9BVP2<br>Q9BZE4<br>Q96G21<br>Q9ULX3<br>Q9H583 Q99575<br>Q9Y3D3<br>P40429 P52815<br>P39019 P18621<br>P63220 Q6P5R6<br>P62273 P39023<br>P15880 P62081<br>Q9Y6K5<br>P40429 P39019<br>P18621 P63220<br>O14920 P20591<br>Q6P5R6 P62273<br>P39023 P15880<br>P19174 P62081<br>Q86SG5<br>O14920 P31151<br>P05109 P06702 |
| hsa03010 Ribosome                               | 11      | 106        | 101         | 2834           | 2.91            | 0.00112242705906763         | 2.95             | P09417 O60218<br>Q92820<br>O14920 O15217<br>Q9NZT1<br>P16284 P27482<br>P35052 Q14145                                                                                                                                                                                                                                                                            |
| hsa05171 Coronavirus disease - COVID-19         | 13      | 155        | 101         | 2834           | 2.35            | 0.00289190376123779         | 2.54             | O14920 Q92820<br>P33527<br>Q9NZT1<br>P27482                                                                                                                                                                                                                                                                                                                     |
| hsa04657 IL-17 signaling pathway                | 5       | 33         | 101         | 2834           | 4.25            | 0.00558227404580776         | 2.25             | Q9NZT1<br>P27482<br>O14920 O14732<br>Q13613 P19174                                                                                                                                                                                                                                                                                                              |
| hsa00790 Folate biosynthesis                    | 3       | 12         | 101         | 2834           | 7.01            | 0.00764639209240929         | 2.12             | Q9UBH0<br>P18510<br>Q9NZH8                                                                                                                                                                                                                                                                                                                                      |
| hsa05418 Fluid shear stress and atherosclerosis | 7       | 67         | 101         | 2834           | 2.93            | 0.00890393646028822         | 2.05             |                                                                                                                                                                                                                                                                                                                                                                 |
| hsa01523 Antifolate resistance                  | 3       | 13         | 101         | 2834           | 6.48            | 0.00968582937230774         | 2.01             |                                                                                                                                                                                                                                                                                                                                                                 |
| hsa04744 Phototransduction                      | 2       | 5          | 101         | 2834           | 11.22           | 0.0117229388047486          | 1.93             |                                                                                                                                                                                                                                                                                                                                                                 |
| hsa04070 Phosphatidylinositol signaling system  | 5       | 40         | 101         | 2834           | 3.51            | 0.012711195462184           | 1.9              |                                                                                                                                                                                                                                                                                                                                                                 |
| hsa04060 Cytokine-cytokine receptor interaction | 3       | 15         | 101         | 2834           | 5.61            | 0.0146322830649248          | 1.83             |                                                                                                                                                                                                                                                                                                                                                                 |

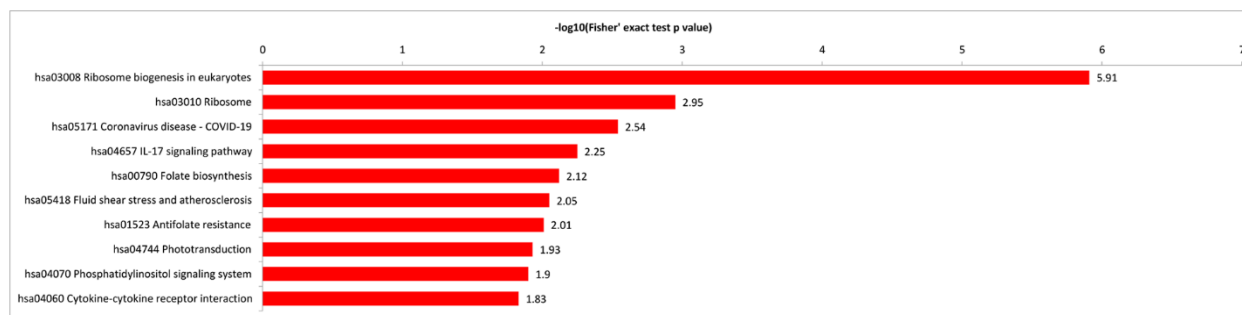

Supplement: aging-16-205478-s011.pdf [file aging-16-205478-s011.pdf]
