# Supplementary material for: Generating detailed intercellular communication patterns in psoriasis at the single-cell level using social networking, pattern recognition, and manifold learning methods to optimize treatment strategies
Source: PubMed Central journal article supplement (PMC10911347; doi:10.18632/aging.205478), 2024-01-29
Supplement: aging-16-205478-s003.pdf [file aging-16-205478-s003.pdf]

**Supplementary Table 2. The cell type-specific regulons (CTSRs) in psoriasis.**

| Num. | Cell clusters | Number of regulons | Number of CTSRs | CTSRs                                                                                                                                                                                                  |
|------|---------------|--------------------|-----------------|--------------------------------------------------------------------------------------------------------------------------------------------------------------------------------------------------------|
| 1    | B cell        | 0                  | 0               | -                                                                                                                                                                                                      |
| 2    | Endo          | 23                 | 23              | E2F7, ETS2, IRF3, TBX21, NFAC1, ZN467, SP2, VEZF1, SPIB, FLI1, KLF5, PRDM6, MAZ, ZN341, PTF1A, STAT1, PATZ1, ZN263, SP3, SP1, E2F6, WT1, CPEB1                                                         |
| 3    | Fibro         | 18                 | 16              | SP4, ZN350, LMX1A, TFE2, VEZF1, PATZ1, KLF12, ZN467, TBX1, ZN263, RXRA, CPEB1, SP1, ZN770, Z324A, SP3                                                                                                  |
| 4    | Hair Follicle | 5                  | 2               | VEZF1, ZNF770                                                                                                                                                                                          |
| 5    | Keratinocyte  | 32                 | 32              | SALL4, IRF3, ZN341, PBX1, TBX1, ZN467, COT1, NFIB, NFAC1, ZN263, SRBP2, EGR4, ETS2, TBX15, PRDM6, SPIB, RARB, KLF3, RXRA, WT1, FOXJ3, SP3, CPEB1, KLF1, PATZ1, MAZ, SP1, ZFX, SP2, ZN770, PITX2, VEZF1 |
| 6    | Langerhans    | 0                  | 0               | -                                                                                                                                                                                                      |
| 7    | Lymphatic     | 1                  | 0               | -                                                                                                                                                                                                      |
| 8    | Mast          | 2                  | 1               | ZNF148                                                                                                                                                                                                 |
| 9    | Melanocyte    | 0                  | 0               | -                                                                                                                                                                                                      |
| 10   | Myeloid       | 3                  | 0               | -                                                                                                                                                                                                      |
| 11   | Plasma        | 17                 | 0               | -                                                                                                                                                                                                      |
| 12   | Schwann       | 16                 | 0               | -                                                                                                                                                                                                      |
| 13   | Sebocyte      | 4                  | 0               | -                                                                                                                                                                                                      |
| 14   | T cell        | 2                  | 0               | -                                                                                                                                                                                                      |
| 15   | VSMC          | 7                  | 2               | CPEB1, SP2                                                                                                                                                                                             |
