# Supplementary material for: Generating detailed intercellular communication patterns in psoriasis at the single-cell level using social networking, pattern recognition, and manifold learning methods to optimize treatment strategies
Source: publisher site journal article supplement (doi:10.18632/aging.205478), 2024-01-29
Supplement: Supplementary file [file aging-v16i3-205478-supplementary-material-SD1.pdf]

SUPPLEMENTARY FIGURES

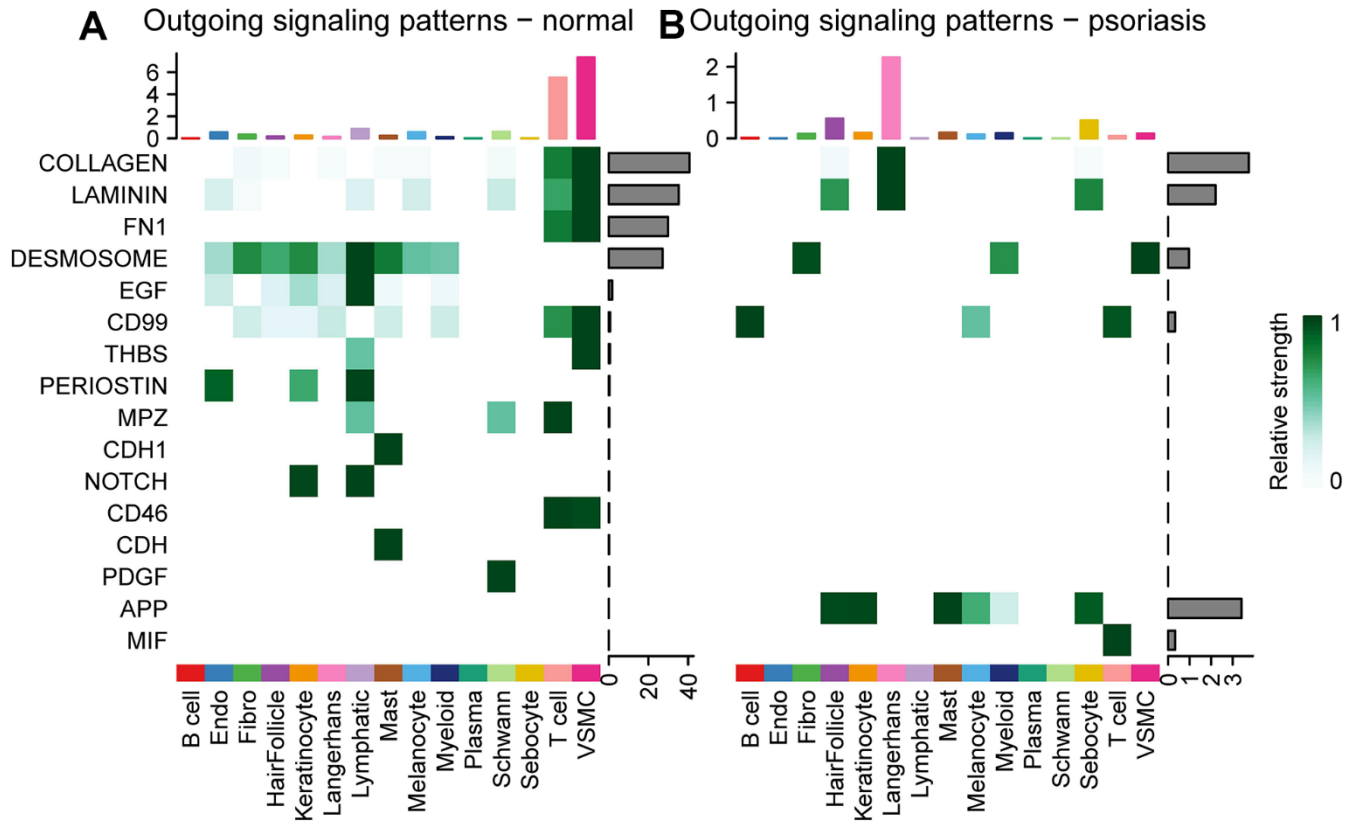

Supplementary Figure 1. Outgoing signaling patterns for each subtype of cells in psoriatic and normal skin. (A) Normal skin. (B) Psoriasis.

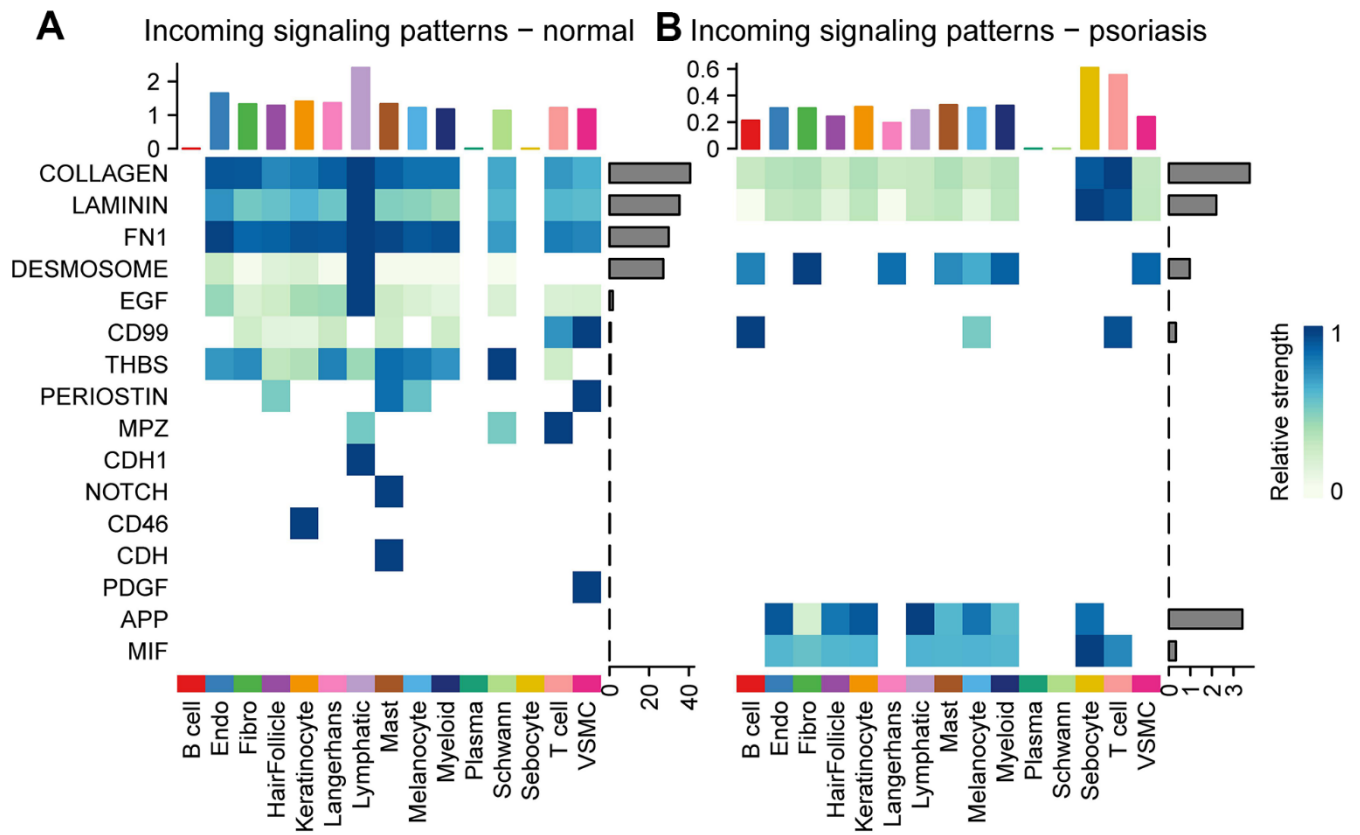

**Supplementary Figure 2. Incoming signaling patterns for each subtype of cells in psoriatic and normal skin. (A) Normal skin. (B) Psoriasis.**

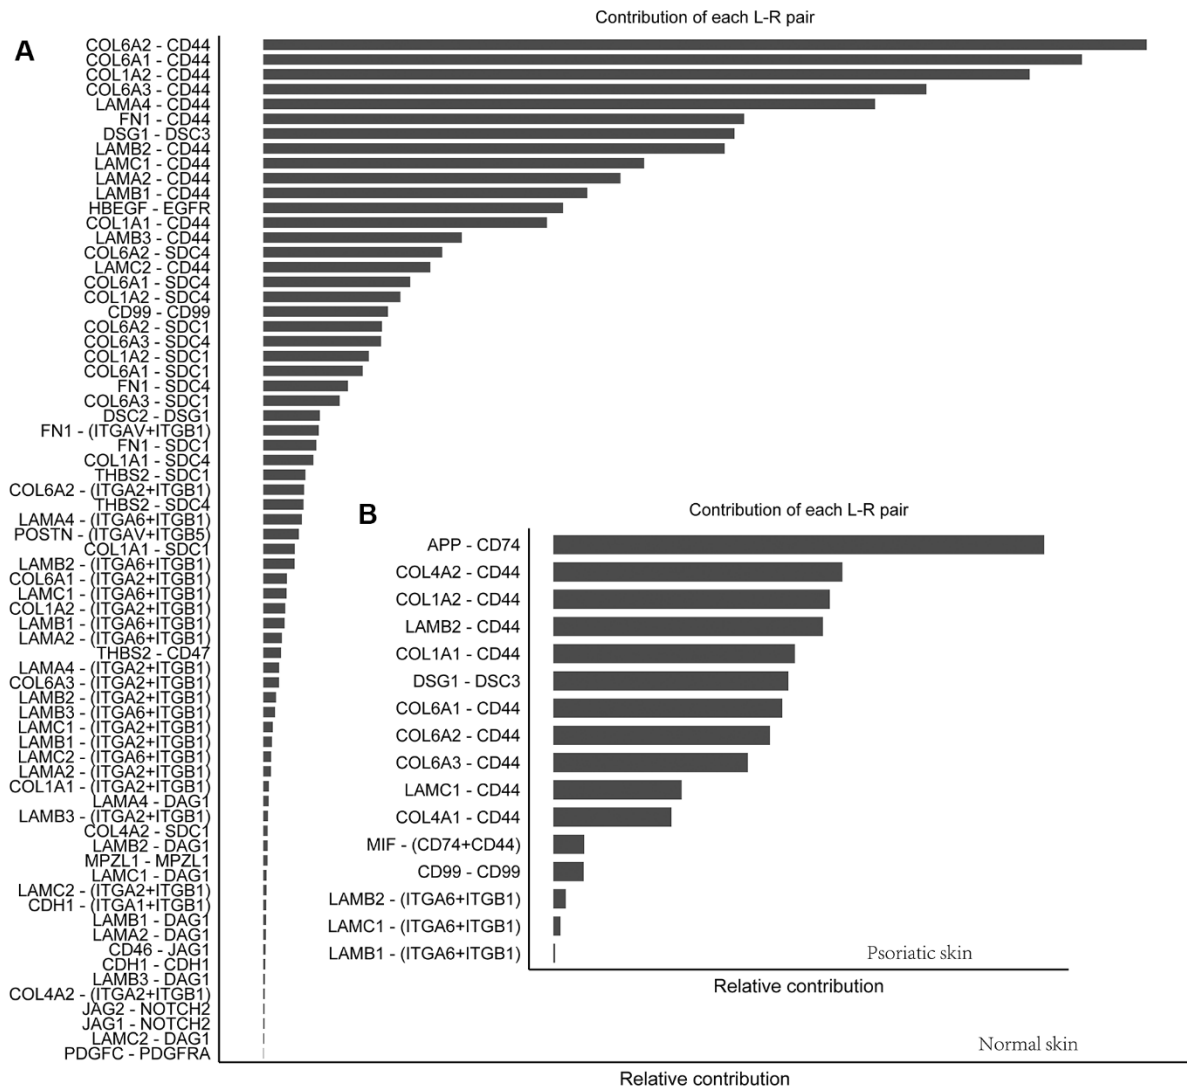

| C | Detection status                              | Proportion         | Ligand receptor                                                                                                                                                                                                                                                                                                          |
|---|-----------------------------------------------|--------------------|--------------------------------------------------------------------------------------------------------------------------------------------------------------------------------------------------------------------------------------------------------------------------------------------------------------------------|
|   | Detectable proteins in pathology sections     | 36<br>(36/80, 45%) | COL1A1, COL1A2, COL4A1, COL4A2, COL6A1, COL6A2, COL6A3, LAMA4, LAMA5, LAMB1, LAMB2, LAMC1, APP, DSC1, DSG1, NAMPT, MIF, ANGPTL2, THBS1, HSPG2, CD99, GRN, SELPLG, ITGA1, CD44, SDC1, ITGA6, DAG1, CD74, DSC3, NCL, CDH5, CD47, SORT1, ITGB1, ITGB4                                                                       |
|   | Unidentified protein at the pathology section | 44<br>(44/80, 55%) | MDK, TNFSF10, ANGPTL4, DLL1, DLL4, JAG2, VEGFB, PGF, APLN, SELE, TNF, MPZL1, ADM, EFNA1, EFNA5, SEMA6A, ICOSL, EFNB1, EFNB2, IGF2, SEMA7A, EDN1, TNFSF12, ITGA9, ITGA10, SDC4, INSR, ACKR3, TNFRSF10B, TLR4, NOTCH1, NOTCH4, VEGFR1, APLNR, TNFRSF1B, CALCRL, EPHA1, EPHA4, PLXNA2, ICOS, CTLA4, EDNRB, TNFRSF12A, CXCR2 |

**Supplementary Figure 3. Contribution of ligand receptors (L-R) in normal skin and psoriatic skin. (A)** Contribution of ligand-receptor pairs in normal skin. **(B)** Contribution of ligand-receptor pairs in psoriatic skin. **(C)** Expression of ligand receptor pairs in pathological tissue sections and the proportion of them detected. The data show that all ligand receptor pairs have been detected in psoriasis and that a relatively high proportion of ligand receptors in normal skin have also been detected for the most part.

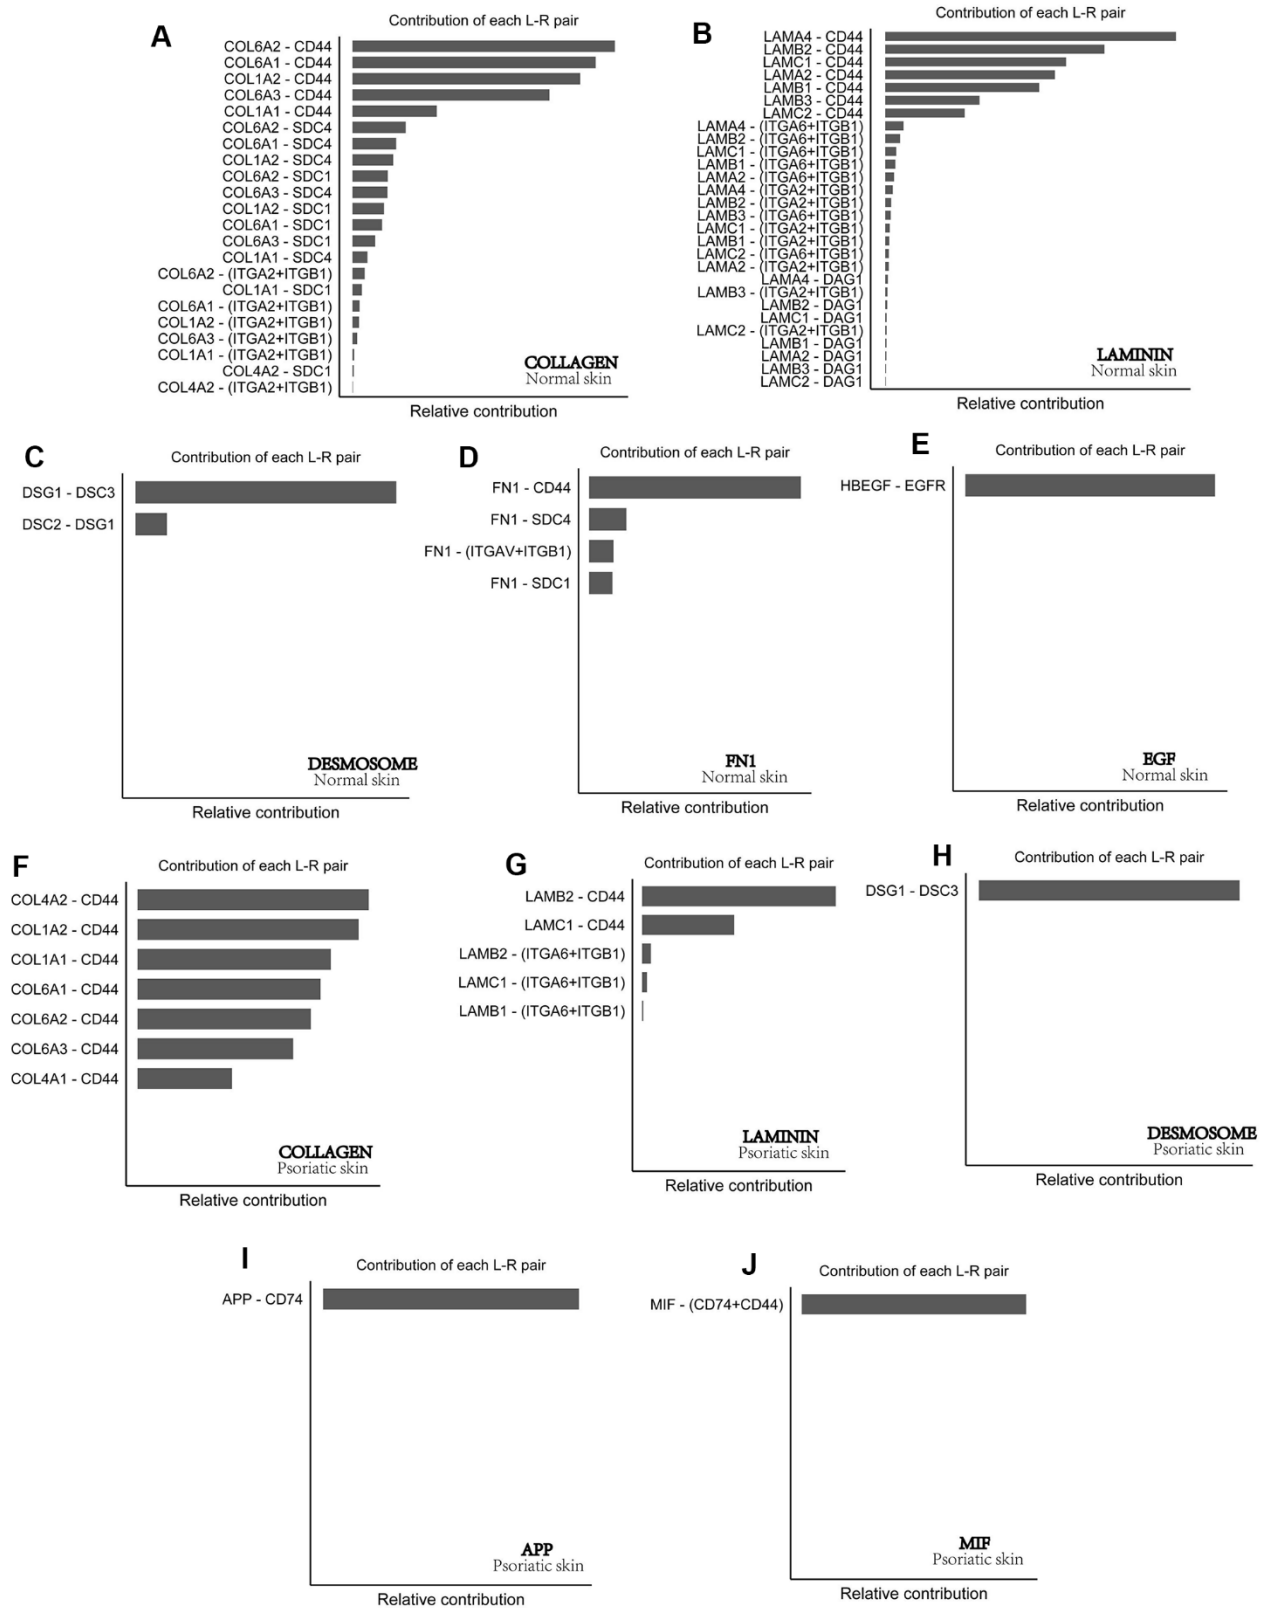

**Supplementary Figure 4. Contribution of ligand receptor (L-R) in different signaling pathways in psoriasis and normal skin.** (A–E) Contribution of ligand receptor pairs in five signaling pathways (COLLAGEN, LAMININ, FN1, DESMOSOME and EGF) in normal skin. (F–J) Contribution of ligand receptor pairs in five signaling pathways (COLLAGEN, LAMININ, DESMOSOME, APP and MIF) in psoriatic skin.
