# Supplementary material for: Generating detailed intercellular communication patterns in psoriasis at the single-cell level using social networking, pattern recognition, and manifold learning methods to optimize treatment strategies
Source: Aging (Albany NY). 2024 Jan 29;16(3):2194–231. doi: 10.18632/aging.205478 (PMC10911347; doi:10.18632/aging.205478)
Supplement: Supplementary Table 1 [file aging-16-205478-s002.xlsx]

## Sheet: Supplementary Table 1
Supplementary Table 1. Demographic data for the psoriasis and normal samples used in the experimental validation section.
Number	Specimen number	Sample disease state	Clinical subtypes	Skin lesion area	Phenotype	Gender	Age	Ethnicity	Race
1	22379-1	Psoriasis 1	Psoriasis vulgaris	Knee skin lesions	Moderate	F	17	Ethnic Han	Yellow
2	22379-2	Psoriasis 1	Psoriasis vulgaris	Knee skin lesions	Moderate	F	17	Ethnic Han	Yellow
3	22379-3	Psoriasis 1	Psoriasis vulgaris	Knee skin lesions	Moderate	F	17	Ethnic Han	Yellow
4	22379-4	Psoriasis 1	Psoriasis vulgaris	Knee skin lesions	Moderate	F	17	Ethnic Han	Yellow
5	22379-5	Psoriasis 1	Psoriasis vulgaris	Knee skin lesions	Moderate	F	17	Ethnic Han	Yellow
6	22379-6	Psoriasis 1	Psoriasis vulgaris	Knee skin lesions	Moderate	F	17	Ethnic Han	Yellow
7	22379-7	Psoriasis 1	Psoriasis vulgaris	Knee skin lesions	Moderate	F	17	Ethnic Han	Yellow
8	22379-8	Psoriasis 1	Psoriasis vulgaris	Knee skin lesions	Moderate	F	17	Ethnic Han	Yellow
9	22379-9	Psoriasis 1	Psoriasis vulgaris	Knee skin lesions	Moderate	F	17	Ethnic Han	Yellow
10	22379-10	Psoriasis 1	Psoriasis vulgaris	Knee skin lesions	Moderate	F	17	Ethnic Han	Yellow
11	22379-11	Psoriasis 1	Psoriasis vulgaris	Knee skin lesions	Moderate	F	17	Ethnic Han	Yellow
12	22379-12	Psoriasis 1	Psoriasis vulgaris	Knee skin lesions	Moderate	F	17	Ethnic Han	Yellow
13	22379-13	Psoriasis 1	Psoriasis vulgaris	Knee skin lesions	Moderate	F	17	Ethnic Han	Yellow
14	22379-14	Psoriasis 1	Psoriasis vulgaris	Knee skin lesions	Moderate	F	17	Ethnic Han	Yellow
15	22379-15	Psoriasis 1	Psoriasis vulgaris	Knee skin lesions	Moderate	F	17	Ethnic Han	Yellow
16	22337-1	Psoriasis 2	Psoriasis vulgaris	Right elbow	Moderate	M	46	Ethnic Han	Yellow
17	22337-2	Psoriasis 2	Psoriasis vulgaris	Right elbow	Moderate	M	46	Ethnic Han	Yellow
18	22337-3	Psoriasis 2	Psoriasis vulgaris	Right elbow	Moderate	M	46	Ethnic Han	Yellow
19	22337-4	Psoriasis 2	Psoriasis vulgaris	Right elbow	Moderate	M	46	Ethnic Han	Yellow
20	22337-5	Psoriasis 2	Psoriasis vulgaris	Right elbow	Moderate	M	46	Ethnic Han	Yellow
21	22337-6	Psoriasis 2	Psoriasis vulgaris	Right elbow	Moderate	M	46	Ethnic Han	Yellow
22	22337-7	Psoriasis 2	Psoriasis vulgaris	Right elbow	Moderate	M	46	Ethnic Han	Yellow
23	22337-8	Psoriasis 2	Psoriasis vulgaris	Right elbow	Moderate	M	46	Ethnic Han	Yellow
24	22337-9	Psoriasis 2	Psoriasis vulgaris	Right elbow	Moderate	M	46	Ethnic Han	Yellow
25	22337-10	Psoriasis 2	Psoriasis vulgaris	Right elbow	Moderate	M	46	Ethnic Han	Yellow
26	22337-11	Psoriasis 2	Psoriasis vulgaris	Right elbow	Moderate	M	46	Ethnic Han	Yellow
27	22337-12	Psoriasis 2	Psoriasis vulgaris	Right elbow	Moderate	M	46	Ethnic Han	Yellow
28	22337-13	Psoriasis 2	Psoriasis vulgaris	Right elbow	Moderate	M	46	Ethnic Han	Yellow
29	22337-14	Psoriasis 2	Psoriasis vulgaris	Right elbow	Moderate	M	46	Ethnic Han	Yellow
30	22337-15	Psoriasis 2	Psoriasis vulgaris	Right elbow	Moderate	M	46	Ethnic Han	Yellow
31	22451-1	Psoriasis 3	Psoriasis vulgaris	Lumbar tissue	Moderate	M	33	Ethnic Han	Yellow
32	22451-2	Psoriasis 3	Psoriasis vulgaris	Lumbar tissue	Moderate	M	33	Ethnic Han	Yellow
33	22451-3	Psoriasis 3	Psoriasis vulgaris	Lumbar tissue	Moderate	M	33	Ethnic Han	Yellow
34	22451-4	Psoriasis 3	Psoriasis vulgaris	Lumbar tissue	Moderate	M	33	Ethnic Han	Yellow
35	22451-5	Psoriasis 3	Psoriasis vulgaris	Lumbar tissue	Moderate	M	33	Ethnic Han	Yellow
36	22451-6	Psoriasis 3	Psoriasis vulgaris	Lumbar tissue	Moderate	M	33	Ethnic Han	Yellow
37	22451-7	Psoriasis 3	Psoriasis vulgaris	Lumbar tissue	Moderate	M	33	Ethnic Han	Yellow
38	22451-8	Psoriasis 3	Psoriasis vulgaris	Lumbar tissue	Moderate	M	33	Ethnic Han	Yellow
39	22451-9	Psoriasis 3	Psoriasis vulgaris	Lumbar tissue	Moderate	M	33	Ethnic Han	Yellow
40	22451-10	Psoriasis 3	Psoriasis vulgaris	Lumbar tissue	Moderate	M	33	Ethnic Han	Yellow
41	22451-11	Psoriasis 3	Psoriasis vulgaris	Lumbar tissue	Moderate	M	33	Ethnic Han	Yellow
42	22451-12	Psoriasis 3	Psoriasis vulgaris	Lumbar tissue	Moderate	M	33	Ethnic Han	Yellow
43	22451-13	Psoriasis 3	Psoriasis vulgaris	Lumbar tissue	Moderate	M	33	Ethnic Han	Yellow
44	22451-14	Psoriasis 3	Psoriasis vulgaris	Lumbar tissue	Moderate	M	33	Ethnic Han	Yellow
45	22451-15	Psoriasis 3	Psoriasis vulgaris	Lumbar tissue	Moderate	M	33	Ethnic Han	Yellow
46	22341-1	Psoriasis 4	Psoriasis vulgaris	Calf skin	Moderate	M	71	Ethnic Han	Yellow
47	22341-2	Psoriasis 4	Psoriasis vulgaris	Calf skin	Moderate	M	71	Ethnic Han	Yellow
48	22341-3	Psoriasis 4	Psoriasis vulgaris	Calf skin	Moderate	M	71	Ethnic Han	Yellow
49	22341-4	Psoriasis 4	Psoriasis vulgaris	Calf skin	Moderate	M	71	Ethnic Han	Yellow
50	22341-5	Psoriasis 4	Psoriasis vulgaris	Calf skin	Moderate	M	71	Ethnic Han	Yellow
51	22341-6	Psoriasis 4	Psoriasis vulgaris	Calf skin	Moderate	M	71	Ethnic Han	Yellow
52	22341-7	Psoriasis 4	Psoriasis vulgaris	Calf skin	Moderate	M	71	Ethnic Han	Yellow
53	22341-8	Psoriasis 4	Psoriasis vulgaris	Calf skin	Moderate	M	71	Ethnic Han	Yellow
54	22341-9	Psoriasis 4	Psoriasis vulgaris	Calf skin	Moderate	M	71	Ethnic Han	Yellow
55	22341-10	Psoriasis 4	Psoriasis vulgaris	Calf skin	Moderate	M	71	Ethnic Han	Yellow
56	22341-11	Psoriasis 4	Psoriasis vulgaris	Calf skin	Moderate	M	71	Ethnic Han	Yellow
57	22341-12	Psoriasis 4	Psoriasis vulgaris	Calf skin	Moderate	M	71	Ethnic Han	Yellow
58	22341-13	Psoriasis 4	Psoriasis vulgaris	Calf skin	Moderate	M	71	Ethnic Han	Yellow
59	22341-14	Psoriasis 4	Psoriasis vulgaris	Calf skin	Moderate	M	71	Ethnic Han	Yellow
60	22341-15	Psoriasis 4	Psoriasis vulgaris	Calf skin	Moderate	M	71	Ethnic Han	Yellow
61	2117320-1	Psoriasis 5	Psoriasis	Back	Moderate	M	30	Ethnic Han	Yellow
62	2117320-2	Psoriasis 5	Psoriasis	Back	Moderate	M	30	Ethnic Han	Yellow
63	2117320-3	Psoriasis 5	Psoriasis	Back	Moderate	M	30	Ethnic Han	Yellow
64	2117320-4	Psoriasis 5	Psoriasis	Back	Moderate	M	30	Ethnic Han	Yellow
65	2117320-5	Psoriasis 5	Psoriasis	Back	Moderate	M	30	Ethnic Han	Yellow
66	2117320-6	Psoriasis 5	Psoriasis	Back	Moderate	M	30	Ethnic Han	Yellow
67	2117320-7	Psoriasis 5	Psoriasis	Back	Moderate	M	30	Ethnic Han	Yellow
68	2117320-8	Psoriasis 5	Psoriasis	Back	Moderate	M	30	Ethnic Han	Yellow
69	2117320-9	Psoriasis 5	Psoriasis	Back	Moderate	M	30	Ethnic Han	Yellow
70	2117320-10	Psoriasis 5	Psoriasis	Back	Moderate	M	30	Ethnic Han	Yellow
71	2117320-11	Psoriasis 5	Psoriasis	Back	Moderate	M	30	Ethnic Han	Yellow
72	2117320-12	Psoriasis 5	Psoriasis	Back	Moderate	M	30	Ethnic Han	Yellow
73	2117320-13	Psoriasis 5	Psoriasis	Back	Moderate	M	30	Ethnic Han	Yellow
74	2117320-14	Psoriasis 5	Psoriasis	Back	Moderate	M	30	Ethnic Han	Yellow
75	2117320-15	Psoriasis 5	Psoriasis	Back	Moderate	M	30	Ethnic Han	Yellow
76	22523-1	Psoriasis 6	Psoriasis guttate	Back	Moderate	M	40	Ethnic Han	Yellow
77	22523-2	Psoriasis 6	Psoriasis guttate	Back	Moderate	M	40	Ethnic Han	Yellow
78	22523-3	Psoriasis 6	Psoriasis guttate	Back	Moderate	M	40	Ethnic Han	Yellow
79	22523-4	Psoriasis 6	Psoriasis guttate	Back	Moderate	M	40	Ethnic Han	Yellow
80	22523-5	Psoriasis 6	Psoriasis guttate	Back	Moderate	M	40	Ethnic Han	Yellow
81	22523-6	Psoriasis 6	Psoriasis guttate	Back	Moderate	M	40	Ethnic Han	Yellow
82	22523-7	Psoriasis 6	Psoriasis guttate	Back	Moderate	M	40	Ethnic Han	Yellow
83	22523-8	Psoriasis 6	Psoriasis guttate	Back	Moderate	M	40	Ethnic Han	Yellow
84	22523-9	Psoriasis 6	Psoriasis guttate	Back	Moderate	M	40	Ethnic Han	Yellow
85	22523-10	Psoriasis 6	Psoriasis guttate	Back	Moderate	M	40	Ethnic Han	Yellow
86	22523-11	Psoriasis 6	Psoriasis guttate	Back	Moderate	M	40	Ethnic Han	Yellow
87	22523-12	Psoriasis 6	Psoriasis guttate	Back	Moderate	M	40	Ethnic Han	Yellow
88	22523-13	Psoriasis 6	Psoriasis guttate	Back	Moderate	M	40	Ethnic Han	Yellow
89	22523-14	Psoriasis 6	Psoriasis guttate	Back	Moderate	M	40	Ethnic Han	Yellow
90	22523-15	Psoriasis 6	Psoriasis guttate	Back	Moderate	M	40	Ethnic Han	Yellow
91	22259-1-1	Psoriasis 7	Psoriasis vulgaris	Calves	Moderate	M	43	Ethnic Han	Yellow
92	22259-1-2	Psoriasis 7	Psoriasis vulgaris	Calves	Moderate	M	43	Ethnic Han	Yellow
93	22259-1-3	Psoriasis 7	Psoriasis vulgaris	Calves	Moderate	M	43	Ethnic Han	Yellow
94	22259-1-4	Psoriasis 7	Psoriasis vulgaris	Calves	Moderate	M	43	Ethnic Han	Yellow
95	22259-1-5	Psoriasis 7	Psoriasis vulgaris	Calves	Moderate	M	43	Ethnic Han	Yellow
96	22259-1-6	Psoriasis 7	Psoriasis vulgaris	Calves	Moderate	M	43	Ethnic Han	Yellow
97	22259-1-7	Psoriasis 7	Psoriasis vulgaris	Calves	Moderate	M	43	Ethnic Han	Yellow
98	22259-1-8	Psoriasis 7	Psoriasis vulgaris	Calves	Moderate	M	43	Ethnic Han	Yellow
99	22259-1-9	Psoriasis 7	Psoriasis vulgaris	Calves	Moderate	M	43	Ethnic Han	Yellow
100	22259-1-10	Psoriasis 7	Psoriasis vulgaris	Calves	Moderate	M	43	Ethnic Han	Yellow
101	22259-1-11	Psoriasis 7	Psoriasis vulgaris	Calves	Moderate	M	43	Ethnic Han	Yellow
102	22259-1-12	Psoriasis 7	Psoriasis vulgaris	Calves	Moderate	M	43	Ethnic Han	Yellow
103	22259-1-13	Psoriasis 7	Psoriasis vulgaris	Calves	Moderate	M	43	Ethnic Han	Yellow
104	22259-1-14	Psoriasis 7	Psoriasis vulgaris	Calves	Moderate	M	43	Ethnic Han	Yellow
105	22259-1-15	Psoriasis 7	Psoriasis vulgaris	Calves	Moderate	M	43	Ethnic Han	Yellow
106	2143299-1	Psoriasis 8	Psoriasis vulgaris, erythrodermic? (combined with type 2 diabetes)	Trunk	Severe	M	50	Ethnic Han	Yellow
107	2143299-2	Psoriasis 8	Psoriasis vulgaris, erythrodermic? (combined with type 2 diabetes)	Trunk	Severe	M	50	Ethnic Han	Yellow
108	2143299-3	Psoriasis 8	Psoriasis vulgaris, erythrodermic? (combined with type 2 diabetes)	Trunk	Severe	M	50	Ethnic Han	Yellow
109	2143299-4	Psoriasis 8	Psoriasis vulgaris, erythrodermic? (combined with type 2 diabetes)	Trunk	Severe	M	50	Ethnic Han	Yellow
110	2143299-5	Psoriasis 8	Psoriasis vulgaris, erythrodermic? (combined with type 2 diabetes)	Trunk	Severe	M	50	Ethnic Han	Yellow
111	2143299-6	Psoriasis 8	Psoriasis vulgaris, erythrodermic? (combined with type 2 diabetes)	Trunk	Severe	M	50	Ethnic Han	Yellow
112	2143299-7	Psoriasis 8	Psoriasis vulgaris, erythrodermic? (combined with type 2 diabetes)	Trunk	Severe	M	50	Ethnic Han	Yellow
113	2143299-8	Psoriasis 8	Psoriasis vulgaris, erythrodermic? (combined with type 2 diabetes)	Trunk	Severe	M	50	Ethnic Han	Yellow
114	2143299-9	Psoriasis 8	Psoriasis vulgaris, erythrodermic? (combined with type 2 diabetes)	Trunk	Severe	M	50	Ethnic Han	Yellow
115	2143299-10	Psoriasis 8	Psoriasis vulgaris, erythrodermic? (combined with type 2 diabetes)	Trunk	Severe	M	50	Ethnic Han	Yellow
116	2143299-11	Psoriasis 8	Psoriasis vulgaris, erythrodermic? (combined with type 2 diabetes)	Trunk	Severe	M	50	Ethnic Han	Yellow
117	2143299-12	Psoriasis 8	Psoriasis vulgaris, erythrodermic? (combined with type 2 diabetes)	Trunk	Severe	M	50	Ethnic Han	Yellow
118	2143299-13	Psoriasis 8	Psoriasis vulgaris, erythrodermic? (combined with type 2 diabetes)	Trunk	Severe	M	50	Ethnic Han	Yellow
119	2143299-14	Psoriasis 8	Psoriasis vulgaris, erythrodermic? (combined with type 2 diabetes)	Trunk	Severe	M	50	Ethnic Han	Yellow
120	2143299-15	Psoriasis 8	Psoriasis vulgaris, erythrodermic? (combined with type 2 diabetes)	Trunk	Severe	M	50	Ethnic Han	Yellow
121	2138072-1	Psoriasis 9	Psoriasis vulgaris	Trunk	Severe	M	41	Ethnic Han	Yellow
122	2138072-2	Psoriasis 9	Psoriasis vulgaris	Trunk	Severe	M	41	Ethnic Han	Yellow
123	2138072-3	Psoriasis 9	Psoriasis vulgaris	Trunk	Severe	M	41	Ethnic Han	Yellow
124	2138072-4	Psoriasis 9	Psoriasis vulgaris	Trunk	Severe	M	41	Ethnic Han	Yellow
125	2138072-5	Psoriasis 9	Psoriasis vulgaris	Trunk	Severe	M	41	Ethnic Han	Yellow
126	2138072-6	Psoriasis 9	Psoriasis vulgaris	Trunk	Severe	M	41	Ethnic Han	Yellow
127	2138072-7	Psoriasis 9	Psoriasis vulgaris	Trunk	Severe	M	41	Ethnic Han	Yellow
128	2138072-8	Psoriasis 9	Psoriasis vulgaris	Trunk	Severe	M	41	Ethnic Han	Yellow
129	2138072-9	Psoriasis 9	Psoriasis vulgaris	Trunk	Severe	M	41	Ethnic Han	Yellow
130	2138072-10	Psoriasis 9	Psoriasis vulgaris	Trunk	Severe	M	41	Ethnic Han	Yellow
131	2138072-11	Psoriasis 9	Psoriasis vulgaris	Trunk	Severe	M	41	Ethnic Han	Yellow
132	2138072-12	Psoriasis 9	Psoriasis vulgaris	Trunk	Severe	M	41	Ethnic Han	Yellow
133	2138072-13	Psoriasis 9	Psoriasis vulgaris	Trunk	Severe	M	41	Ethnic Han	Yellow
134	2138072-14	Psoriasis 9	Psoriasis vulgaris	Trunk	Severe	M	41	Ethnic Han	Yellow
135	2138072-15	Psoriasis 9	Psoriasis vulgaris	Trunk	Severe	M	41	Ethnic Han	Yellow
136	9-1	Normal skin 1	Healthy Skin	Upper limbs	Moderate	M	22	Ethnic Han	Yellow
137	9-2	Normal skin 1	Healthy Skin	Upper limbs	Moderate	M	22	Ethnic Han	Yellow
138	9-3	Normal skin 1	Healthy Skin	Upper limbs	Moderate	M	22	Ethnic Han	Yellow
139	9-4	Normal skin 1	Healthy Skin	Upper limbs	Moderate	M	22	Ethnic Han	Yellow
140	9-5	Normal skin 1	Healthy Skin	Upper limbs	Moderate	M	22	Ethnic Han	Yellow
141	9-6	Normal skin 1	Healthy Skin	Upper limbs	Moderate	M	22	Ethnic Han	Yellow
142	9-7	Normal skin 1	Healthy Skin	Upper limbs	Moderate	M	22	Ethnic Han	Yellow
143	9-8	Normal skin 1	Healthy Skin	Upper limbs	Moderate	M	22	Ethnic Han	Yellow
144	9-9	Normal skin 1	Healthy Skin	Upper limbs	Moderate	M	22	Ethnic Han	Yellow
145	9-10	Normal skin 1	Healthy Skin	Upper limbs	Moderate	M	22	Ethnic Han	Yellow
146	9-11	Normal skin 1	Healthy Skin	Upper limbs	Moderate	M	22	Ethnic Han	Yellow
147	9-12	Normal skin 1	Healthy Skin	Upper limbs	Moderate	M	22	Ethnic Han	Yellow
148	9-13	Normal skin 1	Healthy Skin	Upper limbs	Moderate	M	22	Ethnic Han	Yellow
149	9-14	Normal skin 1	Healthy Skin	Upper limbs	Moderate	M	22	Ethnic Han	Yellow
150	9-15	Normal skin 1	Healthy Skin	Upper limbs	Moderate	M	22	Ethnic Han	Yellow
151	2-1	Normal skin 2	Healthy Skin	Trunk	Moderate	M	44	Ethnic Han	Yellow
152	2-2	Normal skin 2	Healthy Skin	Trunk	Moderate	M	44	Ethnic Han	Yellow
153	2-3	Normal skin 2	Healthy Skin	Trunk	Moderate	M	44	Ethnic Han	Yellow
154	2-4	Normal skin 2	Healthy Skin	Trunk	Moderate	M	44	Ethnic Han	Yellow
155	2-5	Normal skin 2	Healthy Skin	Trunk	Moderate	M	44	Ethnic Han	Yellow
156	2-6	Normal skin 2	Healthy Skin	Trunk	Moderate	M	44	Ethnic Han	Yellow
157	2-7	Normal skin 2	Healthy Skin	Trunk	Moderate	M	44	Ethnic Han	Yellow
158	2-8	Normal skin 2	Healthy Skin	Trunk	Moderate	M	44	Ethnic Han	Yellow
159	2-9	Normal skin 2	Healthy Skin	Trunk	Moderate	M	44	Ethnic Han	Yellow
160	2-10	Normal skin 2	Healthy Skin	Trunk	Moderate	M	44	Ethnic Han	Yellow
161	2-11	Normal skin 2	Healthy Skin	Trunk	Moderate	M	44	Ethnic Han	Yellow
162	2-12	Normal skin 2	Healthy Skin	Trunk	Moderate	M	44	Ethnic Han	Yellow
163	2-13	Normal skin 2	Healthy Skin	Trunk	Moderate	M	44	Ethnic Han	Yellow
164	2-14	Normal skin 2	Healthy Skin	Trunk	Moderate	M	44	Ethnic Han	Yellow
165	2-15	Normal skin 2	Healthy Skin	Trunk	Moderate	M	44	Ethnic Han	Yellow
166	1-1	Normal skin 3	Healthy Skin	Lower extremities	Moderate	F	35	Ethnic Han	Yellow
167	1-2	Normal skin 3	Healthy Skin	Lower extremities	Moderate	F	35	Ethnic Han	Yellow
168	1-3	Normal skin 3	Healthy Skin	Lower extremities	Moderate	F	35	Ethnic Han	Yellow
169	1-4	Normal skin 3	Healthy Skin	Lower extremities	Moderate	F	35	Ethnic Han	Yellow
170	1-5	Normal skin 3	Healthy Skin	Lower extremities	Moderate	F	35	Ethnic Han	Yellow
171	1-6	Normal skin 3	Healthy Skin	Lower extremities	Moderate	F	35	Ethnic Han	Yellow
172	1-7	Normal skin 3	Healthy Skin	Lower extremities	Moderate	F	35	Ethnic Han	Yellow
173	1-8	Normal skin 3	Healthy Skin	Lower extremities	Moderate	F	35	Ethnic Han	Yellow
174	1-9	Normal skin 3	Healthy Skin	Lower extremities	Moderate	F	35	Ethnic Han	Yellow
175	1-10	Normal skin 3	Healthy Skin	Lower extremities	Moderate	F	35	Ethnic Han	Yellow
176	1-11	Normal skin 3	Healthy Skin	Lower extremities	Moderate	F	35	Ethnic Han	Yellow
177	1-12	Normal skin 3	Healthy Skin	Lower extremities	Moderate	F	35	Ethnic Han	Yellow
178	1-13	Normal skin 3	Healthy Skin	Lower extremities	Moderate	F	35	Ethnic Han	Yellow
179	1-14	Normal skin 3	Healthy Skin	Lower extremities	Moderate	F	35	Ethnic Han	Yellow
180	1-15	Normal skin 3	Healthy Skin	Lower extremities	Moderate	F	35	Ethnic Han	Yellow
181	2215208-3-1	Normal skin 4	Healthy Skin	Trunk	Moderate	F	45	Ethnic Han	Yellow
182	2215208-3-2	Normal skin 4	Healthy Skin	Trunk	Moderate	F	45	Ethnic Han	Yellow
183	2215208-3-3	Normal skin 4	Healthy Skin	Trunk	Moderate	F	45	Ethnic Han	Yellow
184	2215208-3-4	Normal skin 4	Healthy Skin	Trunk	Moderate	F	45	Ethnic Han	Yellow
185	2215208-3-5	Normal skin 4	Healthy Skin	Trunk	Moderate	F	45	Ethnic Han	Yellow
186	2215208-3-6	Normal skin 4	Healthy Skin	Trunk	Moderate	F	45	Ethnic Han	Yellow
187	2215208-3-7	Normal skin 4	Healthy Skin	Trunk	Moderate	F	45	Ethnic Han	Yellow
188	2215208-3-8	Normal skin 4	Healthy Skin	Trunk	Moderate	F	45	Ethnic Han	Yellow
189	2215208-3-9	Normal skin 4	Healthy Skin	Trunk	Moderate	F	45	Ethnic Han	Yellow
190	2215208-3-10	Normal skin 4	Healthy Skin	Trunk	Moderate	F	45	Ethnic Han	Yellow
191	2215208-3-11	Normal skin 4	Healthy Skin	Trunk	Moderate	F	45	Ethnic Han	Yellow
192	2215208-3-12	Normal skin 4	Healthy Skin	Trunk	Moderate	F	45	Ethnic Han	Yellow
193	2215208-3-13	Normal skin 4	Healthy Skin	Trunk	Moderate	F	45	Ethnic Han	Yellow
194	2215208-3-14	Normal skin 4	Healthy Skin	Trunk	Moderate	F	45	Ethnic Han	Yellow
195	2215208-3-15	Normal skin 4	Healthy Skin	Trunk	Moderate	F	45	Ethnic Han	Yellow
196	2213060-2-1	Normal skin 5	Healthy Skin	Trunk	Moderate	F	58	Ethnic Han	Yellow
197	2213060-2-2	Normal skin 5	Healthy Skin	Trunk	Moderate	F	58	Ethnic Han	Yellow
198	2213060-2-3	Normal skin 5	Healthy Skin	Trunk	Moderate	F	58	Ethnic Han	Yellow
199	2213060-2-4	Normal skin 5	Healthy Skin	Trunk	Moderate	F	58	Ethnic Han	Yellow
200	2213060-2-5	Normal skin 5	Healthy Skin	Trunk	Moderate	F	58	Ethnic Han	Yellow
201	2213060-2-6	Normal skin 5	Healthy Skin	Trunk	Moderate	F	58	Ethnic Han	Yellow
202	2213060-2-7	Normal skin 5	Healthy Skin	Trunk	Moderate	F	58	Ethnic Han	Yellow
203	2213060-2-8	Normal skin 5	Healthy Skin	Trunk	Moderate	F	58	Ethnic Han	Yellow
204	2213060-2-9	Normal skin 5	Healthy Skin	Trunk	Moderate	F	58	Ethnic Han	Yellow
205	2213060-2-10	Normal skin 5	Healthy Skin	Trunk	Moderate	F	58	Ethnic Han	Yellow
206	2213060-2-11	Normal skin 5	Healthy Skin	Trunk	Moderate	F	58	Ethnic Han	Yellow
207	2213060-2-12	Normal skin 5	Healthy Skin	Trunk	Moderate	F	58	Ethnic Han	Yellow
208	2213060-2-13	Normal skin 5	Healthy Skin	Trunk	Moderate	F	58	Ethnic Han	Yellow
209	2213060-2-14	Normal skin 5	Healthy Skin	Trunk	Moderate	F	58	Ethnic Han	Yellow
210	2213060-2-15	Normal skin 5	Healthy Skin	Trunk	Moderate	F	58	Ethnic Han	Yellow
211	2215065-4-1	Normal skin 6	Healthy Skin	Trunk	Moderate	M	53	Ethnic Han	Yellow
212	2215065-4-2	Normal skin 6	Healthy Skin	Trunk	Moderate	M	53	Ethnic Han	Yellow
213	2215065-4-3	Normal skin 6	Healthy Skin	Trunk	Moderate	M	53	Ethnic Han	Yellow
214	2215065-4-4	Normal skin 6	Healthy Skin	Trunk	Moderate	M	53	Ethnic Han	Yellow
215	2215065-4-5	Normal skin 6	Healthy Skin	Trunk	Moderate	M	53	Ethnic Han	Yellow
216	2215065-4-6	Normal skin 6	Healthy Skin	Trunk	Moderate	M	53	Ethnic Han	Yellow
217	2215065-4-7	Normal skin 6	Healthy Skin	Trunk	Moderate	M	53	Ethnic Han	Yellow
218	2215065-4-8	Normal skin 6	Healthy Skin	Trunk	Moderate	M	53	Ethnic Han	Yellow
219	2215065-4-9	Normal skin 6	Healthy Skin	Trunk	Moderate	M	53	Ethnic Han	Yellow
220	2215065-4-10	Normal skin 6	Healthy Skin	Trunk	Moderate	M	53	Ethnic Han	Yellow
221	2215065-4-11	Normal skin 6	Healthy Skin	Trunk	Moderate	M	53	Ethnic Han	Yellow
222	2215065-4-12	Normal skin 6	Healthy Skin	Trunk	Moderate	M	53	Ethnic Han	Yellow
223	2215065-4-13	Normal skin 6	Healthy Skin	Trunk	Moderate	M	53	Ethnic Han	Yellow
224	2215065-4-14	Normal skin 6	Healthy Skin	Trunk	Moderate	M	53	Ethnic Han	Yellow
225	2215065-4-15	Normal skin 6	Healthy Skin	Trunk	Moderate	M	53	Ethnic Han	Yellow
