# Supplementary material for: Generating detailed intercellular communication patterns in psoriasis at the single-cell level using social networking, pattern recognition, and manifold learning methods to optimize treatment strategies
Source: Aging (Albany NY). 2024 Jan 29;16(3):2194–231. doi: 10.18632/aging.205478 (PMC10911347; doi:10.18632/aging.205478)
Supplement: Supplementary Table 3 [file aging-16-205478-s004.xlsx]

## Sheet: Supplementary Table 3
Supplementary Table 3 Cellular subtype dataset for the distribution of cell type-specific regulons (CTSRs) and their target genes in psoriasis
Cell type	Regulons	TF name	RSS	RSS pval	Gene symbol	Gene id
Endo	Regulon1	E2F7	0.759755	0	A2M,CD74,CD93,ENG,EPAS1,HSPG2,IGFBP7,ITGA6,TCF4,TGFBR2,TM4SF1,VWF,CPD,EMP1,IFITM3,MYH9,NUAK1,SPTBN1	ENSG00000175899,ENSG00000019582,ENSG00000125810,ENSG00000106991,ENSG00000116016,ENSG00000142798,ENSG00000163453,ENSG00000091409,ENSG00000196628,ENSG00000163513,ENSG00000169908,ENSG00000110799,ENSG00000108582,ENSG00000134531,ENSG00000142089,ENSG00000100345,ENSG00000074590,ENSG00000115306
Endo	Regulon2	ETS2	0.75298	0	A2M,CD74,CD93,EMCN,ENG,EPAS1,ETS2,HSPG2,IGFBP7,SPARCL1,TCF4,TGFBR2,TM4SF1,VWF,ATP8B1,IFITM3,IL6ST,MSN,MYH9,SPARC,SPTBN1,TPM4	ENSG00000175899,ENSG00000019582,ENSG00000125810,ENSG00000164035,ENSG00000106991,ENSG00000116016,ENSG00000157557,ENSG00000142798,ENSG00000163453,ENSG00000152583,ENSG00000196628,ENSG00000163513,ENSG00000169908,ENSG00000110799,ENSG00000081923,ENSG00000142089,ENSG00000134352,ENSG00000147065,ENSG00000100345,ENSG00000113140,ENSG00000115306,ENSG00000167460
Endo	Regulon3	IRF3	0.751377	0	A2M,CD74,CD93,EPAS1,ETS2,IGFBP7,PDLIM1,SPARCL1,TCF4,TM4SF1,VWF,CD59,EMP1,EVA1C,IFITM3,SPARC	ENSG00000175899,ENSG00000019582,ENSG00000125810,ENSG00000116016,ENSG00000157557,ENSG00000163453,ENSG00000107438,ENSG00000152583,ENSG00000196628,ENSG00000169908,ENSG00000110799,ENSG00000085063,ENSG00000134531,ENSG00000166979,ENSG00000142089,ENSG00000113140
Endo	Regulon4	TBX21	0.75035	0	CD74,CD93,ENG,EPAS1,HSPG2,IGFBP7,ITGA6,TCF4,TGFBR2,TM4SF1,VWF,IFITM3,SPARC,SPTBN1	ENSG00000019582,ENSG00000125810,ENSG00000106991,ENSG00000116016,ENSG00000142798,ENSG00000163453,ENSG00000091409,ENSG00000196628,ENSG00000163513,ENSG00000169908,ENSG00000110799,ENSG00000142089,ENSG00000113140,ENSG00000115306
Endo	Regulon5	NFAC1	0.750283	0	A2M,CD74,CD93,EPAS1,IGFBP7,SPARCL1,TCF4,TM4SF1,VWF,CD59,EMP1,HIPK3,IFITM3,SPARC	ENSG00000175899,ENSG00000019582,ENSG00000125810,ENSG00000116016,ENSG00000163453,ENSG00000152583,ENSG00000196628,ENSG00000169908,ENSG00000110799,ENSG00000085063,ENSG00000134531,ENSG00000110422,ENSG00000142089,ENSG00000113140
Endo	Regulon6	ZN467	0.750262	0	A2M,CD74,CD93,EPAS1,IGFBP7,ITGA6,SPARCL1,TCF4,TM4SF1,VWF,CD59,EMP1,IFITM3,MGLL,MYH9,OLFM1,SPARC,SPTBN1	ENSG00000175899,ENSG00000019582,ENSG00000125810,ENSG00000116016,ENSG00000163453,ENSG00000091409,ENSG00000152583,ENSG00000196628,ENSG00000169908,ENSG00000110799,ENSG00000085063,ENSG00000134531,ENSG00000142089,ENSG00000074416,ENSG00000100345,ENSG00000130558,ENSG00000113140,ENSG00000115306
Endo	Regulon7	SP2	0.750261	0	A2M,CD74,CD93,ENG,HSPG2,IGFBP7,ITGA6,TCF4,TM4SF1,VWF,EMP1,IFITM3,MYH9,NUAK1,SPARC,SPTBN1	ENSG00000175899,ENSG00000019582,ENSG00000125810,ENSG00000106991,ENSG00000142798,ENSG00000163453,ENSG00000091409,ENSG00000196628,ENSG00000169908,ENSG00000110799,ENSG00000134531,ENSG00000142089,ENSG00000100345,ENSG00000074590,ENSG00000113140,ENSG00000115306
Endo	Regulon8	VEZF1	0.743319	0	A2M,CD74,CD93,EPAS1,ETS2,HSPG2,IGFBP7,ITGA6,PDLIM1,SPARCL1,TCF4,TGFBR2,TM4SF1,VWF,CAV2,CD59,EMP1,IFITM3,IL6ST,MSN,MYH9,NUAK1,PIK3C2A,PLEKHO2,SNRK,SPARC,SPTBN1,STOM,TMEM245,TPM4,UTRN	ENSG00000175899,ENSG00000019582,ENSG00000125810,ENSG00000116016,ENSG00000157557,ENSG00000142798,ENSG00000163453,ENSG00000091409,ENSG00000107438,ENSG00000152583,ENSG00000196628,ENSG00000163513,ENSG00000169908,ENSG00000110799,ENSG00000105971,ENSG00000085063,ENSG00000134531,ENSG00000142089,ENSG00000134352,ENSG00000147065,ENSG00000100345,ENSG00000074590,ENSG00000011405,ENSG00000241839,ENSG00000163788…
Endo	Regulon9	SPIB	0.737906	0	A2M,CD74,CD93,EPAS1,IGFBP7,SPARCL1,TCF4,TM4SF1,TSC22D1,CD59,EMP1,IFITM3,MYH9,SPARC	ENSG00000175899,ENSG00000019582,ENSG00000125810,ENSG00000116016,ENSG00000163453,ENSG00000152583,ENSG00000196628,ENSG00000169908,ENSG00000102804,ENSG00000085063,ENSG00000134531,ENSG00000142089,ENSG00000100345,ENSG00000113140
Endo	Regulon10	FLI1	0.731553	0	A2M,CAV1,CD74,CD93,EPAS1,ETS2,IGFBP7,PDLIM1,SPARCL1,TCF4,TM4SF1,TNFRSF10D,VWF,CAV2,CD59,DNAJA1,EMP1,ETS1,HSPH1,IFITM3,MSN,MYH9,SPARC,SPTBN1,TPM4	ENSG00000175899,ENSG00000105974,ENSG00000019582,ENSG00000125810,ENSG00000116016,ENSG00000157557,ENSG00000163453,ENSG00000107438,ENSG00000152583,ENSG00000196628,ENSG00000169908,ENSG00000173530,ENSG00000110799,ENSG00000105971,ENSG00000085063,ENSG00000086061,ENSG00000134531,ENSG00000134954,ENSG00000120694,ENSG00000142089,ENSG00000147065,ENSG00000100345,ENSG00000113140,ENSG00000115306,ENSG00000167460
Endo	Regulon11	KLF5	0.725048	0	A2M,CD74,CD93,EPAS1,IGFBP7,TM4SF1,TNFRSF10D,DNAJA1,HSPH1	ENSG00000175899,ENSG00000019582,ENSG00000125810,ENSG00000116016,ENSG00000163453,ENSG00000169908,ENSG00000173530,ENSG00000086061,ENSG00000120694
Endo	Regulon12	PRDM6	0.72191	0	A2M,CD74,CD93,EPAS1,IGFBP7,PLVAP,RALGAPA2,SPARCL1,TCF4,TM4SF1,VWF,APP,CD63,CD81,EMP1,GLG1,IFITM3,MYH9,S100A6,SPARC,SPTBN1	ENSG00000175899,ENSG00000019582,ENSG00000125810,ENSG00000116016,ENSG00000163453,ENSG00000130300,ENSG00000188559,ENSG00000152583,ENSG00000196628,ENSG00000169908,ENSG00000110799,ENSG00000142192,ENSG00000135404,ENSG00000110651,ENSG00000134531,ENSG00000090863,ENSG00000142089,ENSG00000100345,ENSG00000197956,ENSG00000113140,ENSG00000115306
Endo	Regulon13	MAZ	0.719023	0	A2M,CD74,IGFBP7,PDLIM1,SPARCL1,TCF4,TM4SF1,CAV2,CD59,MSN,SPARC,SPTBN1,TPM4	ENSG00000175899,ENSG00000019582,ENSG00000163453,ENSG00000107438,ENSG00000152583,ENSG00000196628,ENSG00000169908,ENSG00000105971,ENSG00000085063,ENSG00000147065,ENSG00000113140,ENSG00000115306,ENSG00000167460
Endo	Regulon14	ZN341	0.717418	0	A2M,CD74,CD93,ENG,EPAS1,ETS2,HSPG2,IGFBP7,ITGA6,PDLIM1,PLVAP,SPARCL1,TCF4,TGFBR2,TM4SF1,VWF,AKAP13,ANXA1,ATF4,ATP8B1,CD59,CDKN1A,DNAJA1,EMP1,FOXP1,HSPA8,HSPD1,IFITM3,IL6ST,ITM2A,KTN1,MSN,MYH9,OLFM1,PLXND1,PRKCH,PTTG1IP,S100A6,SPARC,SPTBN1,TPM4	ENSG00000175899,ENSG00000019582,ENSG00000125810,ENSG00000106991,ENSG00000116016,ENSG00000157557,ENSG00000142798,ENSG00000163453,ENSG00000091409,ENSG00000107438,ENSG00000130300,ENSG00000152583,ENSG00000196628,ENSG00000163513,ENSG00000169908,ENSG00000110799,ENSG00000170776,ENSG00000135046,ENSG00000128272,ENSG00000081923,ENSG00000085063,ENSG00000124762,ENSG00000086061,ENSG00000134531,ENSG00000114861…
Endo	Regulon15	PTF1A	0.707425	0	CD93,ENG,VWF,IFITM3,MSN,NUAK1,SPARC,SPTBN1	ENSG00000125810,ENSG00000106991,ENSG00000110799,ENSG00000142089,ENSG00000147065,ENSG00000074590,ENSG00000113140,ENSG00000115306
Endo	Regulon16	STAT1	0.693431	0	A2M,EPAS1,SPARCL1,TCF4,IFITM3,MYH9,PSIP1,SPARC,SPTBN1	ENSG00000175899,ENSG00000116016,ENSG00000152583,ENSG00000196628,ENSG00000142089,ENSG00000100345,ENSG00000164985,ENSG00000113140,ENSG00000115306
Endo	Regulon17	PATZ1	0.687133	0	A2M,BMPR2,CAV1,CD74,CD93,COL15A1,ECE1,EMCN,ENG,EPAS1,ETS2,FLT1,HSPG2,IGFBP7,ITGA6,NRP1,PDLIM1,PLVAP,PRSS23,SPARCL1,SWAP70,TCF4,TGFBR2,TM4SF1,VWF,WWTR1,ANXA1,APP,ATF4,ATP1A1,CCDC50,CCNI,CD59,CD63,CD81,CLIC4,COL4A1,EMP1,ENO1,ETS1,FSTL1,GNAI2,HSPA8,IFITM2,IFITM3,IL6ST,ITGA5,ITGB1,JAK1,KTN1,LAMC1,LGALS3,MACF1,MSN,MYH9,NDRG1,PEA15,PTTG1IP,RHOA,RTN4,S100A10,S100A6,SH3BP5,SPARC,SPTBN1,STOM,TM9SF3,TPM4,Y…	ENSG00000175899,ENSG00000204217,ENSG00000105974,ENSG00000019582,ENSG00000125810,ENSG00000204291,ENSG00000117298,ENSG00000164035,ENSG00000106991,ENSG00000116016,ENSG00000157557,ENSG00000102755,ENSG00000142798,ENSG00000163453,ENSG00000091409,ENSG00000099250,ENSG00000107438,ENSG00000130300,ENSG00000150687,ENSG00000152583,ENSG00000133789,ENSG00000196628,ENSG00000163513,ENSG00000169908,ENSG00000110799…
Endo	Regulon18	ZN263	0.674691	0	A2M,EPAS1,ETS2,IGFBP7,SPARCL1,TCF4,TGFBR2,TM4SF1,VWF,ADAMTSL4-AS1,AKAP13,ANXA1,APP,ATF4,CD59,CDKN1A,EMP1,HSPA8,HSPD1,HSPH1,IFITM3,IL6ST,ITM2A,MCL1,MSN,MYH9,S100A6,SPARC,SPTBN1	ENSG00000175899,ENSG00000116016,ENSG00000157557,ENSG00000163453,ENSG00000152583,ENSG00000196628,ENSG00000163513,ENSG00000169908,ENSG00000110799,ENSG00000143384,ENSG00000170776,ENSG00000135046,ENSG00000142192,ENSG00000128272,ENSG00000085063,ENSG00000124762,ENSG00000134531,ENSG00000109971,ENSG00000144381,ENSG00000120694,ENSG00000142089,ENSG00000134352,ENSG00000078596,ENSG00000147065,ENSG00000100345…
Endo	Regulon19	SP3	0.652544	0	BMPR2,CD74,CD93,COL15A1,ECE1,FLT1,HSPG2,NRP1,PDLIM1,SWAP70,TCF4,TGFBR2,WWTR1,APP,CLIC4,COL4A1,ENO1,ETS1,FSTL1,HSPA8,IFITM3,IL6ST,ITGB1,JAK1,LAMC1,LGALS3,MACF1,MYH9,NDRG1,PEA15,PTTG1IP,RHOA,S100A10,S100A6,SH3BP5,SPTBN1,STOM,TM9SF3,YBX3	ENSG00000204217,ENSG00000019582,ENSG00000125810,ENSG00000204291,ENSG00000117298,ENSG00000102755,ENSG00000142798,ENSG00000099250,ENSG00000107438,ENSG00000133789,ENSG00000196628,ENSG00000163513,ENSG00000018408,ENSG00000142192,ENSG00000169504,ENSG00000187498,ENSG00000074800,ENSG00000134954,ENSG00000163430,ENSG00000109971,ENSG00000142089,ENSG00000134352,ENSG00000150093,ENSG00000162434,ENSG00000135862…
Endo	Regulon20	SP1	0.644819	0	CD74,PDLIM1,TCF4,DNAJA1,DUSP6,HSPA8,IFITM3,MYH9,SPTBN1,UTRN	ENSG00000019582,ENSG00000107438,ENSG00000196628,ENSG00000086061,ENSG00000139318,ENSG00000109971,ENSG00000142089,ENSG00000100345,ENSG00000115306,ENSG00000152818
Endo	Regulon21	E2F6	0.608886	0	IGFBP7,TCF4,APP,DNAJA1,HSPA8,IFITM3,IL6ST,NOP58,SPARC,SPTBN1	ENSG00000163453,ENSG00000196628,ENSG00000142192,ENSG00000086061,ENSG00000109971,ENSG00000142089,ENSG00000134352,ENSG00000055044,ENSG00000113140,ENSG00000115306
Endo	Regulon22	WT1	0.536285	0	CAV1,GNG11,IGFBP7,PRSS23,SPARCL1,TCF4,TM4SF1,VWF,ADAMTSL4-AS1,ANXA1,APLP2,APP,ARID5B,ARPC2,ATF3,ATF4,BAG3,CAST,CCNI,CD59,CD63,CD81,COL4A1,COX4I1,CSDE1,CYB5R3,DDX3X,DNAJA1,DNAJB1,DSTN,EID1,EIF5,EMP1,ENO1,FOS,FSTL1,FTL,GADD45B,GNAI2,GSN,HNRNPU,HSPA8,HSPB1,HSPD1,HSPE1,HSPH1,IER5,IFITM3,IGFBP4,IL6ST,ITGB1,JAK1,LGALS3,MBNL1,MCL1,MTDH,PFDN5,PPP3CA,PTTG1IP,RAC1,RBM25,RBM3,RHOA,RHOB,RPL24,RPL28,RPL37,RPL…	ENSG00000105974,ENSG00000127920,ENSG00000163453,ENSG00000150687,ENSG00000152583,ENSG00000196628,ENSG00000169908,ENSG00000110799,ENSG00000143384,ENSG00000135046,ENSG00000084234,ENSG00000142192,ENSG00000150347,ENSG00000163466,ENSG00000162772,ENSG00000128272,ENSG00000151929,ENSG00000153113,ENSG00000118816,ENSG00000085063,ENSG00000135404,ENSG00000110651,ENSG00000187498,ENSG00000131143,ENSG00000009307…
Endo	Regulon23	CPEB1	0.533776	0	EPAS1,HSPG2,IGFBP7,SPARCL1,TCF4,CAST,CDKN1A,CFL1,CNBP,COX4I1,DDX21,EIF3A,EMP1,HSPH1,MBNL1,MTDH,MYH9,MYL12B,PFDN5,RAC1,RPL14,RPL24,RPS27A,RTN4,S100A10,SPARC,TPM4,UTRN,WAC	ENSG00000116016,ENSG00000142798,ENSG00000163453,ENSG00000152583,ENSG00000196628,ENSG00000153113,ENSG00000124762,ENSG00000172757,ENSG00000169714,ENSG00000131143,ENSG00000165732,ENSG00000107581,ENSG00000134531,ENSG00000120694,ENSG00000152601,ENSG00000147649,ENSG00000100345,ENSG00000118680,ENSG00000123349,ENSG00000136238,ENSG00000188846,ENSG00000114391,ENSG00000143947,ENSG00000115310,ENSG00000197747…
Fibro	Regulon1	SP4	0.793023	0	AEBP1,C1S,CCDC80,COL1A1,COL1A2,COL6A1,COL6A2,COL6A3,CTSK,DCN,FBN1,FSTL1,PDGFRB,SPARC	ENSG00000106624,ENSG00000182326,ENSG00000091986,ENSG00000108821,ENSG00000164692,ENSG00000142156,ENSG00000142173,ENSG00000163359,ENSG00000143387,ENSG00000011465,ENSG00000166147,ENSG00000163430,ENSG00000113721,ENSG00000113140
Fibro	Regulon2	ZN350	0.765868	0	AEBP1,COL1A2,COL6A1,COL6A2,CRISPLD2,FBLN2,FBN1,FSTL1,SERPING1	ENSG00000106624,ENSG00000164692,ENSG00000142156,ENSG00000142173,ENSG00000103196,ENSG00000163520,ENSG00000166147,ENSG00000163430,ENSG00000149131
Fibro	Regulon3	LMX1A	0.750267	0	AEBP1,C1S,CCDC80,COL3A1,COL6A3,DCN,FBN1,MMP2,SERPING1,IL6ST,SPARC,SPTBN1,ZBTB20	ENSG00000106624,ENSG00000182326,ENSG00000091986,ENSG00000168542,ENSG00000163359,ENSG00000011465,ENSG00000166147,ENSG00000087245,ENSG00000149131,ENSG00000134352,ENSG00000113140,ENSG00000115306,ENSG00000181722
Fibro	Regulon4	TFE2	0.744444	0	COL1A1,COL1A2,COL6A2,CRISPLD2,FBLN2,FBN1,FSTL1,SPARC	ENSG00000108821,ENSG00000164692,ENSG00000142173,ENSG00000103196,ENSG00000163520,ENSG00000166147,ENSG00000163430,ENSG00000113140
Fibro	Regulon5	VEZF1	0.696225	0	AEBP1,APCDD1,C1S,CCDC80,COL1A1,COL1A2,COL3A1,COL5A2,COL6A1,COL6A2,COL6A3,CRISPLD2,CTSK,DCN,FBLN2,FBN1,FMOD,FSTL1,IGFBP4,LRP1,MMP2,PCOLCE,SERPING1,SLIT3,THY1,TIMP2,ANXA1,ANXA5,APLP2,APP,CALD1,CCNI,CD59,CD63,CD81,COL18A1,EID1,EMP1,F2R,FTH1,FTL,GSN,IFITM3,IGFBP7,IL6ST,ITM2B,LAMA4,LAPTM4A,LGALS1,LGALS3,NUCKS1,RAB34,RHOA,S100A10,S100A6,SPARC,SPTBN1,STOM,TCF4,TGOLN2	ENSG00000106624,ENSG00000154856,ENSG00000182326,ENSG00000091986,ENSG00000108821,ENSG00000164692,ENSG00000168542,ENSG00000204262,ENSG00000142156,ENSG00000142173,ENSG00000163359,ENSG00000103196,ENSG00000143387,ENSG00000011465,ENSG00000163520,ENSG00000166147,ENSG00000122176,ENSG00000163430,ENSG00000141753,ENSG00000123384,ENSG00000087245,ENSG00000106333,ENSG00000149131,ENSG00000184347,ENSG00000154096…
Fibro	Regulon6	PATZ1	0.696115	0	AEBP1,ANGPTL2,C1S,CCDC80,CFH,COL1A1,COL1A2,COL3A1,COL5A2,COL6A1,COL6A2,COL6A3,CTSK,DCN,FBLN2,FBN1,FSTL1,HTRA1,IGFBP4,LRP1,MMP2,PCOLCE,PRRX1,SERPING1,THY1,TIMP2,VCAN,ACTB,ANXA5,APLP2,APP,CALD1,CALU,CCNI,CD59,CD63,CD81,CST3,EMP1,F2R,FAM114A1,FTH1,FTL,GSN,HDLBP,IFITM3,IGFBP7,IL6ST,ITM2B,LAMA4,LAPTM4A,LGALS1,LGALS3,NUCKS1,RHOA,S100A10,S100A6,SPARC,SPTBN1,TCF4,TIMP1,TPM4,ZFP36L1	ENSG00000106624,ENSG00000136859,ENSG00000182326,ENSG00000091986,ENSG00000000971,ENSG00000108821,ENSG00000164692,ENSG00000168542,ENSG00000204262,ENSG00000142156,ENSG00000142173,ENSG00000163359,ENSG00000143387,ENSG00000011465,ENSG00000163520,ENSG00000166147,ENSG00000163430,ENSG00000166033,ENSG00000141753,ENSG00000123384,ENSG00000087245,ENSG00000106333,ENSG00000116132,ENSG00000149131,ENSG00000154096…
Fibro	Regulon7	KLF12	0.692739	0	AEBP1,COL1A1,COL1A2,COL6A1,COL6A2,FBLN2,FBN1,FSTL1,IGFBP4,CD63,FTL,IL6ST,S100A6,SPARC,SPTBN1,TCF4,ZBTB20	ENSG00000106624,ENSG00000108821,ENSG00000164692,ENSG00000142156,ENSG00000142173,ENSG00000163520,ENSG00000166147,ENSG00000163430,ENSG00000141753,ENSG00000135404,ENSG00000087086,ENSG00000134352,ENSG00000197956,ENSG00000113140,ENSG00000115306,ENSG00000196628,ENSG00000181722
Fibro	Regulon8	ZN467	0.691489	0	AEBP1,C1S,CCDC80,CDH11,COL1A1,COL1A2,COL3A1,COL5A1,COL6A1,COL6A2,COL6A3,CTSK,CYBRD1,DCN,FBLN2,FBN1,FGFR1,FSTL1,HTRA1,IGFBP4,ITGB5,LPAR1,LRP1,LTBP1,MFAP4,MMP2,MXRA5,OLFML3,PCOLCE,PRRX1,SERPING1,SFRP2,THY1,TIMP2,VCAN,ACTB,ANXA5,APP,CALU,CAV1,CCNI,CD63,CD81,CD99,CIRBP,CKAP4,CLU,CNN3,COL18A1,COX6C,CST3,DAB2,EMP1,ENO1,FTH1,FTL,GPX4,GSN,HDLBP,HSPG2,IFITM3,IGFBP7,IL1R1,IL6ST,LAMA4,LAMC1,LAPTM4A,LGALS1,L…	ENSG00000106624,ENSG00000182326,ENSG00000091986,ENSG00000140937,ENSG00000108821,ENSG00000164692,ENSG00000168542,ENSG00000130635,ENSG00000142156,ENSG00000142173,ENSG00000163359,ENSG00000143387,ENSG00000071967,ENSG00000011465,ENSG00000163520,ENSG00000166147,ENSG00000077782,ENSG00000163430,ENSG00000166033,ENSG00000141753,ENSG00000082781,ENSG00000198121,ENSG00000123384,ENSG00000049323,ENSG00000166482…
Fibro	Regulon9	TBX1	0.690456	0	AEBP1,COL1A1,COL1A2,COL6A1,COL6A2,COL6A3,FBN1,FMOD,FSTL1,PDGFRB,SERPING1,TIMP2,CALU,CD63,CD81,FTH1,FTL,IFITM3,IGFBP7,IL6ST,LGALS1,S100A6,SPARC,SPTBN1,TCF4,TPM1	ENSG00000106624,ENSG00000108821,ENSG00000164692,ENSG00000142156,ENSG00000142173,ENSG00000163359,ENSG00000166147,ENSG00000122176,ENSG00000163430,ENSG00000113721,ENSG00000149131,ENSG00000035862,ENSG00000128595,ENSG00000135404,ENSG00000110651,ENSG00000167996,ENSG00000087086,ENSG00000142089,ENSG00000163453,ENSG00000134352,ENSG00000100097,ENSG00000197956,ENSG00000113140,ENSG00000115306,ENSG00000196628…
Fibro	Regulon10	ZN263	0.687166	0	AEBP1,C1S,CCDC80,COL1A2,COL3A1,COL6A1,COL6A2,COL6A3,CTSK,FBN1,FSTL1,IGFBP4,MMP2,SERPING1,SLIT3,TIMP2,ANXA5,APP,CALD1,CCNI,CD63,CD81,CLIC4,CST3,EMP1,EPB41L2,FTH1,FTL,IFITM3,IGFBP7,IL6ST,LGALS1,NUCKS1,S100A6,SPARC,SPTBN1,TCF4	ENSG00000106624,ENSG00000182326,ENSG00000091986,ENSG00000164692,ENSG00000168542,ENSG00000142156,ENSG00000142173,ENSG00000163359,ENSG00000143387,ENSG00000166147,ENSG00000163430,ENSG00000141753,ENSG00000087245,ENSG00000149131,ENSG00000184347,ENSG00000035862,ENSG00000164111,ENSG00000142192,ENSG00000122786,ENSG00000118816,ENSG00000135404,ENSG00000110651,ENSG00000169504,ENSG00000101439,ENSG00000134531…
Fibro	Regulon11	RXRA	0.676678	0	AEBP1,C1S,CCDC80,CDH11,CFH,COL1A1,COL1A2,COL3A1,COL5A1,COL5A2,COL6A1,COL6A2,COL6A3,CTSK,CYBRD1,DCN,DDR2,FBLN2,FBN1,FGFR1,FSTL1,HTRA1,IGFBP4,ITGB5,LPAR1,LRP1,LUM,MFAP4,MMP2,MXRA5,OLFML3,PAM,PCOLCE,PRRX1,SERPING1,SFRP2,THY1,TIMP2,VCAN,ACTB,ANXA1,ANXA5,APLP2,APP,CALD1,CALU,CAST,CAV1,CCNI,CD59,CD63,CD81,CD99,CIRBP,CKAP4,CLU,CNN3,COL15A1,COL18A1,COX6C,CST3,DAB2,DAD1,DPYSL3,EID1,EMP1,ENO1,FTH1,FTL,GPNM…	ENSG00000106624,ENSG00000182326,ENSG00000091986,ENSG00000140937,ENSG00000000971,ENSG00000108821,ENSG00000164692,ENSG00000168542,ENSG00000130635,ENSG00000204262,ENSG00000142156,ENSG00000142173,ENSG00000163359,ENSG00000143387,ENSG00000071967,ENSG00000011465,ENSG00000162733,ENSG00000163520,ENSG00000166147,ENSG00000077782,ENSG00000163430,ENSG00000166033,ENSG00000141753,ENSG00000082781,ENSG00000198121…
Fibro	Regulon12	CPEB1	0.661785	0	ANTXR1,C1S,CCDC80,COL1A1,COL3A1,COL5A2,COL6A3,DCN,FBLN1,FBN1,IGFBP4,ITGB5,LRP1,MMP2,OLFML3,PCOLCE,PRRX1,SERPING1,TIMP2,VCAN,BAG3,CALD1,CAST,CIRBP,CST3,DNAJA1,EID1,EMP1,FTL,GPX4,HDLBP,HSPA8,HSPB1,HSPG2,HSPH1,ID2,LAMB1,LGALS1,LGALS3,RAB34,RPL37,RTN4,S100A10,S100A6,SPARC,TCF4,TPM4	ENSG00000169604,ENSG00000182326,ENSG00000091986,ENSG00000108821,ENSG00000168542,ENSG00000204262,ENSG00000163359,ENSG00000011465,ENSG00000077942,ENSG00000166147,ENSG00000141753,ENSG00000082781,ENSG00000123384,ENSG00000087245,ENSG00000116774,ENSG00000106333,ENSG00000116132,ENSG00000149131,ENSG00000035862,ENSG00000038427,ENSG00000151929,ENSG00000122786,ENSG00000153113,ENSG00000099622,ENSG00000101439…
Fibro	Regulon13	SP1	0.610612	0	CCDC80,COL1A2,COL6A1,COL6A2,FBN1,FSTL1,IGFBP4,SERPING1,TIMP2,ANXA5,BAG3,CD63,CD81,DNAJA1,DNAJB1,FTH1,FTL,GADD45B,HSPA8,IFITM3,IGFBP7,IL6ST,LGALS1,MAN1A1,RAB31,S100A6,SPARC,SPTBN1,TCF4	ENSG00000091986,ENSG00000164692,ENSG00000142156,ENSG00000142173,ENSG00000166147,ENSG00000163430,ENSG00000141753,ENSG00000149131,ENSG00000035862,ENSG00000164111,ENSG00000151929,ENSG00000135404,ENSG00000110651,ENSG00000086061,ENSG00000132002,ENSG00000167996,ENSG00000087086,ENSG00000099860,ENSG00000109971,ENSG00000142089,ENSG00000163453,ENSG00000134352,ENSG00000100097,ENSG00000111885,ENSG00000168461…
Fibro	Regulon14	ZN770	0.578649	0	FSTL1,IGFBP4,SERPING1,TIMP2,CD63,CD81,FTL,IFITM3,IL6ST,REV3L,S100A6,SPARC,SPTBN1,TCF4	ENSG00000163430,ENSG00000141753,ENSG00000149131,ENSG00000035862,ENSG00000135404,ENSG00000110651,ENSG00000087086,ENSG00000142089,ENSG00000134352,ENSG00000009413,ENSG00000197956,ENSG00000113140,ENSG00000115306,ENSG00000196628
Fibro	Regulon15	Z324A	0.540088	0	FSTL1,CALD1,CD63,CD81,IFITM3,S100A6,SPARC,SPTBN1	ENSG00000163430,ENSG00000122786,ENSG00000135404,ENSG00000110651,ENSG00000142089,ENSG00000197956,ENSG00000113140,ENSG00000115306
Fibro	Regulon16	SP3	0.517062	0	COL1A2,COL6A1,FSTL1,IGFBP4,BAG3,DNAJB1,GADD45B,HSPA8,HSPD1,IFITM3,IGFBP7,MAN1A1,NR4A1,ROCK2,SPARC,SPTBN1,TCF4	ENSG00000164692,ENSG00000142156,ENSG00000163430,ENSG00000141753,ENSG00000151929,ENSG00000132002,ENSG00000099860,ENSG00000109971,ENSG00000144381,ENSG00000142089,ENSG00000163453,ENSG00000111885,ENSG00000123358,ENSG00000134318,ENSG00000113140,ENSG00000115306,ENSG00000196628
Fibro	Regulon17	SP2	0.48313	0.054	APP,CD63,GLG1,IL6ST,S100A6,SPTBN1,TCF4	ENSG00000142192,ENSG00000135404,ENSG00000090863,ENSG00000134352,ENSG00000197956,ENSG00000115306,ENSG00000196628
Fibro	Regulon18	ZN341	0.464807	0.126	APP,ARRDC3,EMP1,IFITM3,IGFBP7,IL6ST,SPARC,SPTBN1,TCF4	ENSG00000142192,ENSG00000113369,ENSG00000134531,ENSG00000142089,ENSG00000163453,ENSG00000134352,ENSG00000113140,ENSG00000115306,ENSG00000196628
Hair Follicle	Regulon1	VEZF1	0.209575	0.04	DSC3,DSP,PERP,SFN,ACTB,AKAP9,ALDH2,ALDOA,AQP3,ARF1,ARPC2,ATF4,CALML3,CAST,CCT3,CD44,CFL1,COX4I1,COX5B,COX6C,COX7C,CRABP2,CSDE1,DBI,DDX21,DMKN,DSG1,DSTN,DYNLL1,EDF1,EEF1A1,EIF5B,ENO1,ENSA,EZR,FXYD3,GJA1,GOLGA4,GSTP1,GUK1,HDGF,HSPB1,ITM2B,JUP,KTN1,LGALS3,MYL12B,NDUFS5,P4HB,PFDN5,PGK1,PKM,PKP1,PPL,PSMA7,RAC1,RBM3,RHOA,RPL10A,RPL14,RPL24,RPL26,RPL28,RPL36,RPL37,RPL38,RPS15,RPS15A,RPS2,RPS27A,RPS29,RT…	ENSG00000134762,ENSG00000096696,ENSG00000112378,ENSG00000175793,ENSG00000075624,ENSG00000127914,ENSG00000111275,ENSG00000149925,ENSG00000165272,ENSG00000143761,ENSG00000163466,ENSG00000128272,ENSG00000178363,ENSG00000153113,ENSG00000163468,ENSG00000026508,ENSG00000172757,ENSG00000131143,ENSG00000135940,ENSG00000164919,ENSG00000127184,ENSG00000143320,ENSG00000009307,ENSG00000155368,ENSG00000165732…
Hair Follicle	Regulon2	ZN770	0.209113	0.04	DSC3,DSP,PERP,SFN,ALDH2,ALDOA,ARPC2,BTF3,C4orf3,CFL1,CNBP,COX4I1,COX5B,DBI,DSTN,DYNLL1,EDF1,ENO1,ENSA,GSTP1,GUK1,HDGF,HSPB1,IDI1,JUP,MYL12B,P4HB,PFDN5,PGK1,PKM,PSMA7,RAC1,RBM3,RPL10A,RPL14,RPL24,RPL26,RPL28,RPL29,RPL36,RPL37,RPL38,RPS15,RPS15A,RPS2,RPS27A,RPS29,S100A11,S100A14,S100A16,S100A8,S100A9,SDC1,SERBP1,SLC25A3,SLC25A6,SNHG5,TSPO,UQCRH,YBX3,YWHAZ	ENSG00000134762,ENSG00000096696,ENSG00000112378,ENSG00000175793,ENSG00000111275,ENSG00000149925,ENSG00000163466,ENSG00000145741,ENSG00000164096,ENSG00000172757,ENSG00000169714,ENSG00000131143,ENSG00000135940,ENSG00000155368,ENSG00000125868,ENSG00000088986,ENSG00000107223,ENSG00000074800,ENSG00000143420,ENSG00000084207,ENSG00000143774,ENSG00000143321,ENSG00000106211,ENSG00000067064,ENSG00000173801…
Hair Follicle	Regulon3	SP3	0.208426	0.06	DSC3,DSP,PERP,SFN,ALDH2,ALDOA,ARPC2,BTF3,C4orf3,CFL1,CNBP,COX4I1,COX5B,DBI,DSTN,DYNLL1,EDF1,ENO1,ENSA,GSTP1,GUK1,HDGF,HSPB1,JUP,KTN1,MYL12B,P4HB,PFDN5,PGK1,PKM,PSMA7,RAC1,RBM3,RPL10A,RPL14,RPL24,RPL26,RPL28,RPL29,RPL36,RPL37,RPL38,RPS15,RPS15A,RPS2,RPS27A,RPS29,RTN4,S100A11,S100A14,S100A16,S100A9,SDC1,SERBP1,SERF2,SLC25A3,SLC25A6,SNHG5,TPI1,TSPO,UQCRH,UQCRQ,YWHAZ	ENSG00000134762,ENSG00000096696,ENSG00000112378,ENSG00000175793,ENSG00000111275,ENSG00000149925,ENSG00000163466,ENSG00000145741,ENSG00000164096,ENSG00000172757,ENSG00000169714,ENSG00000131143,ENSG00000135940,ENSG00000155368,ENSG00000125868,ENSG00000088986,ENSG00000107223,ENSG00000074800,ENSG00000143420,ENSG00000084207,ENSG00000143774,ENSG00000143321,ENSG00000106211,ENSG00000173801,ENSG00000126777…
Hair Follicle	Regulon4	RXRA	0.207744	0.095	DSC3,DSP,PERP,SFN,ALDH2,ALDOA,ARPC2,BTF3,C4orf3,CD44,CFL1,CNBP,COX4I1,COX5B,DBI,DSG1,DSTN,DYNLL1,EDF1,ENO1,ENSA,GJA1,GSTP1,GUK1,HDGF,HSPB1,ITM2B,JUP,KTN1,P4HB,PFDN5,PGK1,PKM,PSMA7,RAC1,RBM3,RPL10A,RPL14,RPL24,RPL26,RPL28,RPL29,RPL36,RPL37,RPL38,RPS15,RPS15A,RPS2,RPS27A,RPS29,RTN4,S100A11,S100A14,S100A16,S100A8,S100A9,SDC1,SERF2,SLC25A3,SLC25A6,SNHG5,TPI1,TSPO,UQCRH,UQCRQ,VIM,YBX3,YWHAZ	ENSG00000134762,ENSG00000096696,ENSG00000112378,ENSG00000175793,ENSG00000111275,ENSG00000149925,ENSG00000163466,ENSG00000145741,ENSG00000164096,ENSG00000026508,ENSG00000172757,ENSG00000169714,ENSG00000131143,ENSG00000135940,ENSG00000155368,ENSG00000134760,ENSG00000125868,ENSG00000088986,ENSG00000107223,ENSG00000074800,ENSG00000143420,ENSG00000152661,ENSG00000084207,ENSG00000143774,ENSG00000143321…
Hair Follicle	Regulon5	CPEB1	0.206724	0.13	ALDH2,AQP3,CAST,CCT3,CNBP,COX4I1,DDX21,DMKN,EDF1,GJA1,GSTP1,GUK1,HSPB1,IDI1,LGALS3,MYL12B,NDUFS5,PEBP1,PFDN5,PKM,RAC1,RBM3,RPL14,RPL24,RPL29,RPL36,RPL37,RPS15,RPS15A,RPS27A,RTN4,SLC25A3	ENSG00000111275,ENSG00000165272,ENSG00000153113,ENSG00000163468,ENSG00000169714,ENSG00000131143,ENSG00000165732,ENSG00000161249,ENSG00000107223,ENSG00000152661,ENSG00000084207,ENSG00000143774,ENSG00000106211,ENSG00000067064,ENSG00000131981,ENSG00000118680,ENSG00000168653,ENSG00000089220,ENSG00000123349,ENSG00000067225,ENSG00000136238,ENSG00000102317,ENSG00000188846,ENSG00000114391,ENSG00000162244…
Keratinocyte	Regulon1	SALL4	0.804528	0	ALDH2,DBI,DMKN,DSC3,DSP,GSTP1,JUP,LY6D,S100A14,S100A9,SFN,HSPB1	ENSG00000111275,ENSG00000155368,ENSG00000161249,ENSG00000134762,ENSG00000096696,ENSG00000084207,ENSG00000173801,ENSG00000167656,ENSG00000189334,ENSG00000163220,ENSG00000175793,ENSG00000106211
Keratinocyte	Regulon2	IRF3	0.803347	0	ALDH2,DBI,DMKN,DSC3,DSG1,DSP,GSTP1,JUP,KRT1,KRT10,LY6D,PERP,PKP1,S100A14,S100A8,S100A9,SFN,ARPC2,COX4I1,HSPB1,MX1	ENSG00000111275,ENSG00000155368,ENSG00000161249,ENSG00000134762,ENSG00000134760,ENSG00000096696,ENSG00000084207,ENSG00000173801,ENSG00000167768,ENSG00000186395,ENSG00000167656,ENSG00000112378,ENSG00000081277,ENSG00000189334,ENSG00000143546,ENSG00000163220,ENSG00000175793,ENSG00000163466,ENSG00000131143,ENSG00000106211,ENSG00000157601
Keratinocyte	Regulon3	ZN341	0.801196	0	ALDH2,DMKN,DSC3,DSG1,DSP,GSTP1,JUP,KRT1,KRT6A,KRTDAP,LY6D,PERP,PKP1,S100A14,S100A7,S100A8,S100A9,SFN,COX4I1	ENSG00000111275,ENSG00000161249,ENSG00000134762,ENSG00000134760,ENSG00000096696,ENSG00000084207,ENSG00000173801,ENSG00000167768,ENSG00000205420,ENSG00000188508,ENSG00000167656,ENSG00000112378,ENSG00000081277,ENSG00000189334,ENSG00000143556,ENSG00000143546,ENSG00000163220,ENSG00000175793,ENSG00000131143
Keratinocyte	Regulon4	PBX1	0.795791	0	LY6D,PERP,S100A14,S100A8,S100A9,SFN,COX4I1,ENO1,GOT2	ENSG00000167656,ENSG00000112378,ENSG00000189334,ENSG00000143546,ENSG00000163220,ENSG00000175793,ENSG00000131143,ENSG00000074800,ENSG00000125166
Keratinocyte	Regulon5	TBX1	0.795115	0	ALDH2,CRABP2,DBI,DMKN,DSC3,DSG1,DSP,GSTP1,JUP,KRT1,KRTDAP,LY6D,PERP,PKP1,S100A14,S100A16,S100A7,S100A8,S100A9,SFN,TRIM29,ARPC2,CD44,COX4I1,HSPB1,RPL10A,RPL37,RPL38,RPS2,TOLLIP,TSPO	ENSG00000111275,ENSG00000143320,ENSG00000155368,ENSG00000161249,ENSG00000134762,ENSG00000134760,ENSG00000096696,ENSG00000084207,ENSG00000173801,ENSG00000167768,ENSG00000188508,ENSG00000167656,ENSG00000112378,ENSG00000081277,ENSG00000189334,ENSG00000188643,ENSG00000143556,ENSG00000143546,ENSG00000163220,ENSG00000175793,ENSG00000137699,ENSG00000163466,ENSG00000026508,ENSG00000131143,ENSG00000106211…
Keratinocyte	Regulon6	ZN467	0.793775	0	ALDH2,CRABP2,DBI,DMKN,DSG1,DSP,GSTP1,JUP,KRT1,KRTDAP,PERP,PKP1,S100A14,S100A16,S100A7,S100A8,S100A9,SFN,TRIM29,ALDOA,ARPC2,COX4I1,HSPB1,P4HB,RPL37,SCD,TSPO	ENSG00000111275,ENSG00000143320,ENSG00000155368,ENSG00000161249,ENSG00000134760,ENSG00000096696,ENSG00000084207,ENSG00000173801,ENSG00000167768,ENSG00000188508,ENSG00000112378,ENSG00000081277,ENSG00000189334,ENSG00000188643,ENSG00000143556,ENSG00000143546,ENSG00000163220,ENSG00000175793,ENSG00000137699,ENSG00000149925,ENSG00000163466,ENSG00000131143,ENSG00000106211,ENSG00000185624,ENSG00000145592…
Keratinocyte	Regulon7	COT1	0.785306	0	DMKN,PERP,PKP1,S100A16,S100A8,SFN,TOLLIP	ENSG00000161249,ENSG00000112378,ENSG00000081277,ENSG00000188643,ENSG00000143546,ENSG00000175793,ENSG00000078902
Keratinocyte	Regulon8	NFIB	0.771552	0	ALDH2,DMKN,DSC3,JUP,KRT10,S100A8	ENSG00000111275,ENSG00000161249,ENSG00000134762,ENSG00000173801,ENSG00000186395,ENSG00000143546
Keratinocyte	Regulon9	NFAC1	0.769109	0	ALDH2,DBI,DMKN,DSG1,DSP,GSTP1,JUP,KRT1,KRT10,KRTDAP,PKP1,S100A14,S100A16,S100A7,ARPC2,COX4I1,GGCT,RPS2	ENSG00000111275,ENSG00000155368,ENSG00000161249,ENSG00000134760,ENSG00000096696,ENSG00000084207,ENSG00000173801,ENSG00000167768,ENSG00000186395,ENSG00000188508,ENSG00000081277,ENSG00000189334,ENSG00000188643,ENSG00000143556,ENSG00000163466,ENSG00000131143,ENSG00000006625,ENSG00000140988
Keratinocyte	Regulon10	ZN263	0.764663	0	ALDH2,DBI,DMKN,DSC3,GSTP1,JUP,KRT1,KRT10,KRT6A,LY6D,PERP,S100A14,S100A16,S100A7,S100A8,S100A9,SFN,ALDOA,ARPC2,BTF3,CD44,CFL1,CNBP,COX4I1,COX5B,COX7C,ENO1,ENSA,HSPB1,P4HB,RPL14,RPL28,RPL36,RPL38,RPS15,RPS2,RPS27A,SERF2,SLC25A6,TSPO,UQCRQ	ENSG00000111275,ENSG00000155368,ENSG00000161249,ENSG00000134762,ENSG00000084207,ENSG00000173801,ENSG00000167768,ENSG00000186395,ENSG00000205420,ENSG00000167656,ENSG00000112378,ENSG00000189334,ENSG00000188643,ENSG00000143556,ENSG00000143546,ENSG00000163220,ENSG00000175793,ENSG00000149925,ENSG00000163466,ENSG00000145741,ENSG00000026508,ENSG00000172757,ENSG00000169714,ENSG00000131143,ENSG00000135940…
Keratinocyte	Regulon11	SRBP2	0.762957	0	ALDH2,DBI,DMKN,DSC3,DSP,GSTP1,JUP,KRT1,LY6D,PERP,S100A14,S100A16,S100A7,S100A8,S100A9,SFN,ALDOA,ARPC2,BTF3,COX4I1,COX5B,COX7C,ENO1,ENSA,HSPB1,NDUFS7,RPL10A,RPL14,RPL26,RPL28,RPL36,RPL37,RPL38,RPS15,RPS2,RPS27A,RPS29,SERF2,SLC25A6,TSPO	ENSG00000111275,ENSG00000155368,ENSG00000161249,ENSG00000134762,ENSG00000096696,ENSG00000084207,ENSG00000173801,ENSG00000167768,ENSG00000167656,ENSG00000112378,ENSG00000189334,ENSG00000188643,ENSG00000143556,ENSG00000143546,ENSG00000163220,ENSG00000175793,ENSG00000149925,ENSG00000163466,ENSG00000145741,ENSG00000131143,ENSG00000135940,ENSG00000127184,ENSG00000074800,ENSG00000143420,ENSG00000106211…
Keratinocyte	Regulon12	EGR4	0.762671	0	ALDH2,CRABP2,DBI,DMKN,DSC3,DSP,GSTP1,JUP,KRT1,LY6D,PERP,S100A14,S100A7,S100A9,SFN,TRIM29,ALDOA,ARPC2,CFL1,CNBP,COX4I1,COX5B,ENO1,ENSA,HSPB1,RANGAP1,RPL10A,RPL14,RPL28,RPL36,RPL37,RPL38,RPS15,RPS2,RPS27A,RPS29,SLC25A6,TSPO	ENSG00000111275,ENSG00000143320,ENSG00000155368,ENSG00000161249,ENSG00000134762,ENSG00000096696,ENSG00000084207,ENSG00000173801,ENSG00000167768,ENSG00000167656,ENSG00000112378,ENSG00000189334,ENSG00000143556,ENSG00000163220,ENSG00000175793,ENSG00000137699,ENSG00000149925,ENSG00000163466,ENSG00000172757,ENSG00000169714,ENSG00000131143,ENSG00000135940,ENSG00000074800,ENSG00000143420,ENSG00000106211…
Keratinocyte	Regulon13	ETS2	0.762162	0	ALDH2,CRABP2,DBI,DMKN,DSC3,DSG1,DSP,EMP2,GSTP1,JUP,KRT1,KRT10,KRT6A,LY6D,PERP,PKP1,S100A14,S100A16,S100A7,S100A8,S100A9,SFN,TRIM29,ALDOA,ARPC2,BTF3,CD44,CFL1,CNBP,COX4I1,COX5B,COX7C,DYNLL1,ENO1,ENSA,GJA1,HSPB1,MYL12B,P4HB,PSMA7,RBM3,RPL10A,RPL14,RPL26,RPL28,RPL36,RPL37,RPL38,RPS15,RPS2,RPS27A,RPS29,SERF2,SLC25A5,SLC25A6,SPTSSA,TSPO,UQCRQ,YBX3,YWHAZ	ENSG00000111275,ENSG00000143320,ENSG00000155368,ENSG00000161249,ENSG00000134762,ENSG00000134760,ENSG00000096696,ENSG00000213853,ENSG00000084207,ENSG00000173801,ENSG00000167768,ENSG00000186395,ENSG00000205420,ENSG00000167656,ENSG00000112378,ENSG00000081277,ENSG00000189334,ENSG00000188643,ENSG00000143556,ENSG00000143546,ENSG00000163220,ENSG00000175793,ENSG00000137699,ENSG00000149925,ENSG00000163466…
Keratinocyte	Regulon14	TBX15	0.760192	0	ALDH2,DBI,DSC3,DSP,GSTP1,JUP,LY6D,PERP,S100A14,S100A16,S100A8,S100A9,SFN,ALDOA,ARPC2,COX4I1,COX5B,ENO1,ENSA,HSPB1,RPL10A,RPL14,RPL36,RPL37,RPL38,RPS15,RPS2,RPS27A,RPS29,SERF2,SLC25A6,TSPO	ENSG00000111275,ENSG00000155368,ENSG00000134762,ENSG00000096696,ENSG00000084207,ENSG00000173801,ENSG00000167656,ENSG00000112378,ENSG00000189334,ENSG00000188643,ENSG00000143546,ENSG00000163220,ENSG00000175793,ENSG00000149925,ENSG00000163466,ENSG00000131143,ENSG00000135940,ENSG00000074800,ENSG00000143420,ENSG00000106211,ENSG00000198755,ENSG00000188846,ENSG00000130255,ENSG00000145592,ENSG00000172809…
Keratinocyte	Regulon15	PRDM6	0.756689	0	ALDH2,DMKN,DSG1,DSP,GSTP1,JUP,KRT10,KRTDAP,PKP1,S100A16,S100A8,ARPC2,COX4I1,CYB5A,ENSA,HSPB1,RPL14,RPL36,RPL37,RPS15,RPS27A,RPS29	ENSG00000111275,ENSG00000161249,ENSG00000134760,ENSG00000096696,ENSG00000084207,ENSG00000173801,ENSG00000186395,ENSG00000188508,ENSG00000081277,ENSG00000188643,ENSG00000143546,ENSG00000163466,ENSG00000131143,ENSG00000166347,ENSG00000143420,ENSG00000106211,ENSG00000188846,ENSG00000130255,ENSG00000145592,ENSG00000115268,ENSG00000143947,ENSG00000213741
Keratinocyte	Regulon16	SPIB	0.746566	0	DMKN,KRT1,S100A7,S100A8,S100A9	ENSG00000161249,ENSG00000167768,ENSG00000143556,ENSG00000143546,ENSG00000163220
Keratinocyte	Regulon17	RARB	0.744878	0	CRABP2,DBI,DMKN,GSTP1,KRT1,LY6D,PERP,PKP1,S100A14,S100A7,S100A9,SFN,ARPC2,CNBP,COX4I1,COX5B,DNAJB1,ENSA,HSPB1,MAFB,RPL10A,RPL14,RPL28,RPL36,RPL37,RPL38,RPS15,RPS2,RPS27A,RPS29,SLC25A6,TSPO	ENSG00000143320,ENSG00000155368,ENSG00000161249,ENSG00000084207,ENSG00000167768,ENSG00000167656,ENSG00000112378,ENSG00000081277,ENSG00000189334,ENSG00000143556,ENSG00000163220,ENSG00000175793,ENSG00000163466,ENSG00000169714,ENSG00000131143,ENSG00000135940,ENSG00000132002,ENSG00000143420,ENSG00000106211,ENSG00000204103,ENSG00000198755,ENSG00000188846,ENSG00000108107,ENSG00000130255,ENSG00000145592…
Keratinocyte	Regulon18	KLF3	0.704921	0	ALDH2,AQP3,CA12,CALML3,CRABP2,DBI,DHCR24,DMKN,DSC3,DSP,EMP2,FXYD3,GLTP,GSTP1,IMPA2,JUP,KLF5,KRT16,LAD1,LY6D,LYPD3,NRARP,NSG1,PERP,PKP1,PKP3,RAB25,S100A14,S100A16,S100A9,SDC1,SERPINB5,SFN,SLC2A1,TMEM45A,TRIM29,ACTB,ALDOA,APLP2,APRT,ARF1,ARPC2,ATF4,ATP1B3,ATP6V1F,ATP6V1G1,BRK1,BTF3,CBR1,CCNI,CCT3,CD44,CDH1,CDKN1A,CFL1,CLTA,CNBP,COX4I1,COX5B,COX7A2,COX8A,CST3,CSTB,CYCS,DEGS1,DNAJB1,DSTN,DUSP1,DYNLL1…	ENSG00000111275,ENSG00000165272,ENSG00000074410,ENSG00000178363,ENSG00000143320,ENSG00000155368,ENSG00000116133,ENSG00000161249,ENSG00000134762,ENSG00000096696,ENSG00000213853,ENSG00000089356,ENSG00000139433,ENSG00000084207,ENSG00000141401,ENSG00000173801,ENSG00000102554,ENSG00000186832,ENSG00000159166,ENSG00000167656,ENSG00000124466,ENSG00000198435,ENSG00000168824,ENSG00000112378,ENSG00000081277…
Keratinocyte	Regulon19	RXRA	0.700141	0	ALDH2,AQP3,CRABP2,DBI,DMKN,DSC3,DSG1,DSP,EMP2,FXYD3,GLTP,GSTP1,JUP,KLF5,KRT1,KRT10,KRT6A,LAD1,LY6D,PERP,PKP1,RHOV,S100A14,S100A16,S100A7,S100A8,S100A9,SDC1,SERPINB5,SFN,TRIM29,ACTB,ALDOA,ARF1,ARPC2,ATF4,ATP1B3,ATP6V1G1,BICD2,BTF3,C4orf3,CALM2,CAP1,CAST,CCT3,CCT6A,CD44,CD9,CFL1,CNBP,COX4I1,COX5B,COX6B1,COX7C,COX8A,CSDE1,CSNK1A1,CSTB,DDX1,DDX21,DNAJB1,DSTN,DYNLL1,EDF1,EEF1A1,EIF3A,EIF3H,EIF4G1,EIF5…	ENSG00000111275,ENSG00000165272,ENSG00000143320,ENSG00000155368,ENSG00000161249,ENSG00000134762,ENSG00000134760,ENSG00000096696,ENSG00000213853,ENSG00000089356,ENSG00000139433,ENSG00000084207,ENSG00000173801,ENSG00000102554,ENSG00000167768,ENSG00000186395,ENSG00000205420,ENSG00000159166,ENSG00000167656,ENSG00000112378,ENSG00000081277,ENSG00000104140,ENSG00000189334,ENSG00000188643,ENSG00000143556…
Keratinocyte	Regulon20	WT1	0.698911	0	ALDH2,CALML3,CLCA2,DBI,DMKN,DSC3,DSG1,DSP,FXYD3,GLTP,GSTP1,JUP,KLF5,LAD1,PERP,PKP3,S100A14,S100A16,S100A8,S100A9,SDC1,SERPINB5,SFN,TRIM29,ACTB,ALDOA,APRT,ARF1,ARPC2,BTF3,CALM2,CAST,CCAR1,CCNI,CCT3,CCT6A,CD44,CFL1,CNBP,COX4I1,COX5B,COX7C,CSDE1,CSTB,DDX21,DSTN,DYNLL1,EDF1,EEF1A1,EIF3H,EIF5,EIF5B,ENO1,ENSA,EZR,GJA1,GOLGA4,GUK1,HDGF,HSPB1,KTN1,MYL12B,NDUFS5,NSA2,P4HB,PEBP1,PFDN5,PGK1,PKM,PPIB,PPIG,PR…	ENSG00000111275,ENSG00000178363,ENSG00000137975,ENSG00000155368,ENSG00000161249,ENSG00000134762,ENSG00000134760,ENSG00000096696,ENSG00000089356,ENSG00000139433,ENSG00000084207,ENSG00000173801,ENSG00000102554,ENSG00000159166,ENSG00000112378,ENSG00000184363,ENSG00000189334,ENSG00000188643,ENSG00000143546,ENSG00000163220,ENSG00000115884,ENSG00000206075,ENSG00000175793,ENSG00000137699,ENSG00000075624…
Keratinocyte	Regulon21	FOXJ3	0.697135	0	ALDH2,AQP3,DMKN,DSG1,DSP,GSTP1,KRT1,KRT10,PKP1,APRT,CAST,CCAR1,CCT3,CDKN1A,CNBP,COX4I1,COX6B1,CSTB,DDX21,EDF1,GJA1,GUK1,HINT1,HSPB1,IFI16,LGALS3,MYL12B,NDUFS5,PEBP1,PFDN5,PKM,PRDX1,PSMB6,RAC1,RBM3,RPL14,RPL24,RPL29,RPL36,RPL37,RPS15,RPS15A,RPS27A,RTN4,S100A11,SLC25A3,UBL5,VAMP8,ZFP36	ENSG00000111275,ENSG00000165272,ENSG00000161249,ENSG00000134760,ENSG00000096696,ENSG00000084207,ENSG00000167768,ENSG00000186395,ENSG00000081277,ENSG00000198931,ENSG00000153113,ENSG00000060339,ENSG00000163468,ENSG00000124762,ENSG00000169714,ENSG00000131143,ENSG00000126267,ENSG00000160213,ENSG00000165732,ENSG00000107223,ENSG00000152661,ENSG00000143774,ENSG00000169567,ENSG00000106211,ENSG00000163565…
Keratinocyte	Regulon22	SP3	0.692527	0	ALDH2,AQP3,CA12,CALML3,CLCA2,CRABP2,DBI,DHCR24,DMKN,DSC3,DSG3,DSP,EHF,EMP2,FGFBP1,FXYD3,GJB2,GLTP,GSTP1,JUP,KLF5,KRT16,KRT6A,KRTDAP,LAD1,LY6D,LYPD3,NRARP,NSG1,PERP,PKP1,PKP3,RAB25,S100A14,S100A16,S100A7,S100A8,S100A9,SDC1,SERPINB5,SFN,SLC2A1,TACSTD2,TMEM45A,TRIM29,ACTB,ADAMTSL4-AS1,ALDH3A2,ALDOA,APLP2,APRT,ARF1,ARPC2,ATP1A1,ATP1B3,ATP2A2,ATP6V1G1,BAG1,BHLHE40,BRK1,BTF3,C6orf132,CALM2,CAP1,CAPN1,C…	ENSG00000111275,ENSG00000165272,ENSG00000074410,ENSG00000178363,ENSG00000137975,ENSG00000143320,ENSG00000155368,ENSG00000116133,ENSG00000161249,ENSG00000134762,ENSG00000134757,ENSG00000096696,ENSG00000135373,ENSG00000213853,ENSG00000137440,ENSG00000089356,ENSG00000165474,ENSG00000139433,ENSG00000084207,ENSG00000173801,ENSG00000102554,ENSG00000186832,ENSG00000205420,ENSG00000188508,ENSG00000159166…
Keratinocyte	Regulon23	CPEB1	0.68811	0	ALDH2,AQP3,CA12,CSTA,DBI,DMKN,DSC3,DSG1,DSP,EHF,GSTP1,JUP,KRT1,KRT10,KRTDAP,LYPD3,NSG1,PKP1,RAB25,RHOV,S100A14,S100A16,S100A8,S100A9,ABLIM1,APRT,ARPC2,ATP6V1G1,BRK1,BTF3,CAMLG,CAST,CBR1,CCT3,CD44,CDKN1A,CFL1,CHCHD2,CLTB,CNBP,COX4I1,COX6A1,COX6B1,COX8A,CSNK1A1,CSTB,CTSD,DDX1,DDX21,DEGS1,EDF1,EIF2S2,EIF3A,EIF3L,EIF4B,EIF4G1,EIF5,EIF5B,EMP1,ENSA,GHITM,GJA1,GLO1,GM2A,GNA15,GRN,GUK1,HDLBP,HEBP2,HINT1,…	ENSG00000111275,ENSG00000165272,ENSG00000074410,ENSG00000121552,ENSG00000155368,ENSG00000161249,ENSG00000134762,ENSG00000134760,ENSG00000096696,ENSG00000135373,ENSG00000084207,ENSG00000173801,ENSG00000167768,ENSG00000186395,ENSG00000188508,ENSG00000124466,ENSG00000168824,ENSG00000081277,ENSG00000132698,ENSG00000104140,ENSG00000189334,ENSG00000188643,ENSG00000143546,ENSG00000163220,ENSG00000099204…
Keratinocyte	Regulon24	KLF1	0.687452	0	ALDH2,AQP3,CALML3,CLCA2,CRABP2,DBI,DMKN,DSC3,DSP,EMP2,FXYD3,GLTP,GSTP1,JUP,LAD1,PERP,PKP3,S100A14,S100A16,SDC1,SERPINB5,SFN,ACTB,ALDOA,APRT,ARF1,ARPC2,ATF4,ATP1B3,BTF3,CCT3,CD44,CFL1,CNBP,COX4I1,COX5B,COX6B1,COX6C,COX7C,CSDE1,CSNK1A1,DDX21,DSTN,DYNLL1,EDF1,EEF1A1,EIF3A,EIF5,EIF5B,ENO1,ENSA,EZR,GOLGA4,GUK1,HDGF,HDLBP,HSPB1,IQGAP1,KTN1,LGALS3,MTDH,MYH9,NDUFS5,P4HB,PEBP1,PFDN5,PGK1,PKM,PRPF40A,PSMA7…	ENSG00000111275,ENSG00000165272,ENSG00000178363,ENSG00000137975,ENSG00000143320,ENSG00000155368,ENSG00000161249,ENSG00000134762,ENSG00000096696,ENSG00000213853,ENSG00000089356,ENSG00000139433,ENSG00000084207,ENSG00000173801,ENSG00000159166,ENSG00000112378,ENSG00000184363,ENSG00000189334,ENSG00000188643,ENSG00000115884,ENSG00000206075,ENSG00000175793,ENSG00000075624,ENSG00000149925,ENSG00000198931…
Keratinocyte	Regulon25	PATZ1	0.685168	0	ALDH2,AQP3,C19orf33,CRABP2,DBI,DHCR24,DMKN,DSC3,DSG1,DSG3,DSP,EMP2,FXYD3,GLTP,GSTP1,JUP,KLF5,KRT1,KRT10,KRT6A,KRTDAP,LAD1,LY6D,LYPD3,PERP,PKP1,PTPRF,S100A14,S100A16,S100A7,S100A8,S100A9,SBSN,SDC1,SERPINB5,SFN,SLC2A1,TRIM29,ACTB,ACTR2,ALDH3A2,ALDOA,APLP2,ARF1,ARPC2,ARPC5L,ATF4,ATP1A1,ATP1B3,ATP6V1G1,BAIAP2,BTF3,C1orf21,CALM2,CAP1,CAST,CBR1,CCNI,CCT3,CCT6A,CD44,CD82,CDKN1A,CFL1,CHD4,CKAP4,CLTA,CLTB…	ENSG00000111275,ENSG00000165272,ENSG00000167644,ENSG00000143320,ENSG00000155368,ENSG00000116133,ENSG00000161249,ENSG00000134762,ENSG00000134760,ENSG00000134757,ENSG00000096696,ENSG00000213853,ENSG00000089356,ENSG00000139433,ENSG00000084207,ENSG00000173801,ENSG00000102554,ENSG00000167768,ENSG00000186395,ENSG00000205420,ENSG00000188508,ENSG00000159166,ENSG00000167656,ENSG00000124466,ENSG00000112378…
Keratinocyte	Regulon26	MAZ	0.683941	0	ALDH2,AQP3,CALML3,CRABP2,DBI,DHCR24,DMKN,DSC3,DSG3,DSP,EMP2,FGFBP1,FXYD3,GLTP,GSTP1,JUP,KLF5,LAD1,LY6D,PERP,PKP1,RAB25,S100A14,S100A16,S100A7,S100A8,S100A9,SDC1,SERPINB5,SFN,SLC2A1,TRIM29,ABLIM1,ACTB,ALDOA,APLP2,ARF1,ARPC2,ARPC5L,ATF4,ATP1B3,BPTF,BTF3,CALM2,CAP1,CAST,CCNI,CCT3,CD44,CD82,CFL1,CNBP,COX4I1,COX5B,COX6C,CSDE1,CSNK1A1,CSTB,CYC1,DDX21,DSTN,DYNLL1,EDF1,EEF1A1,EI24,EIF3A,EIF3H,EIF5,EIF5B,…	ENSG00000111275,ENSG00000165272,ENSG00000178363,ENSG00000143320,ENSG00000155368,ENSG00000116133,ENSG00000161249,ENSG00000134762,ENSG00000134757,ENSG00000096696,ENSG00000213853,ENSG00000137440,ENSG00000089356,ENSG00000139433,ENSG00000084207,ENSG00000173801,ENSG00000102554,ENSG00000159166,ENSG00000167656,ENSG00000112378,ENSG00000081277,ENSG00000132698,ENSG00000189334,ENSG00000188643,ENSG00000143556…
Keratinocyte	Regulon27	SP1	0.676806	0	AKR1B10,ALDH2,ALDH3B2,AQP3,C19orf33,CA12,CALML3,CLCA2,CRABP2,DBI,DHCR24,DMKN,DSC2,DSC3,DSG1,DSG3,DSP,EHF,EMP2,FXYD3,GJB2,GLTP,GSTP1,IMPA2,JUP,KLF5,KRT1,KRT16,KRT6A,KRTDAP,LAD1,LY6D,LYPD3,NSG1,PERP,PKP1,PKP3,PTPRF,RAB25,RHOV,S100A14,S100A16,S100A7,S100A8,S100A9,SBSN,SDC1,SERPINB5,SFN,SLC2A1,TACSTD2,TMEM45A,TRIM29,ABLIM1,ACTB,ACTR2,ACTR3,AHCYL1,ALDOA,ANP32B,AP2S1,APRT,ARF1,ARPC2,ARPC5L,ATF4,ATP1A1,…	ENSG00000198074,ENSG00000111275,ENSG00000132746,ENSG00000165272,ENSG00000167644,ENSG00000074410,ENSG00000178363,ENSG00000137975,ENSG00000143320,ENSG00000155368,ENSG00000116133,ENSG00000161249,ENSG00000134755,ENSG00000134762,ENSG00000134760,ENSG00000134757,ENSG00000096696,ENSG00000135373,ENSG00000213853,ENSG00000089356,ENSG00000165474,ENSG00000139433,ENSG00000084207,ENSG00000141401,ENSG00000173801…
Keratinocyte	Regulon28	ZFX	0.676232	0	ALDH2,AQP3,CA12,CALML3,CLCA2,CRABP2,DBI,DHCR24,DMKN,DSC3,DSP,EHF,EMP2,FGFBP1,FXYD3,GLTP,GSTP1,JUP,KLF5,KRT1,KRT16,KRT6A,KRTDAP,LAD1,LY6D,NRARP,NSG1,PERP,PKP1,PKP3,RAB25,S100A14,S100A16,S100A7,S100A8,S100A9,SDC1,SERPINB5,SFN,SLC2A1,TACSTD2,TMEM45A,TRIM29,ABLIM1,ACTB,ADAMTSL4-AS1,ALDOA,ANP32B,APLP2,APRT,ARF1,ARPC2,ARPC5L,ATF3,ATF4,ATP1A1,ATP1B3,ATP6V1G1,BHLHE40,BPTF,BRK1,BTF3,C1orf43,C6orf132,CALM2…	ENSG00000111275,ENSG00000165272,ENSG00000074410,ENSG00000178363,ENSG00000137975,ENSG00000143320,ENSG00000155368,ENSG00000116133,ENSG00000161249,ENSG00000134762,ENSG00000096696,ENSG00000135373,ENSG00000213853,ENSG00000137440,ENSG00000089356,ENSG00000139433,ENSG00000084207,ENSG00000173801,ENSG00000102554,ENSG00000167768,ENSG00000186832,ENSG00000205420,ENSG00000188508,ENSG00000159166,ENSG00000167656…
Keratinocyte	Regulon29	SP2	0.666763	0	ALDH2,AQP3,CALML3,CRABP2,DBI,DHCR24,DMKN,DSC2,DSC3,DSG1,DSP,EMP2,FXYD3,GLTP,GSTP1,IMPA2,JUP,KLF5,KRT1,KRT6A,LAD1,LY6D,LYPD3,PERP,PKP1,PKP3,PTPRF,RAB25,RHOV,S100A14,S100A16,S100A7,S100A8,S100A9,SDC1,SERPINB5,SFN,SLC2A1,TACSTD2,TMEM45A,TRIM29,ABLIM1,ACTB,ACTR2,ACTR3,AHCY,ALDOA,ANP32B,APLP2,APRT,ARF1,ARHGDIA,ARPC2,ARPC5L,ATF4,ATP1B3,ATP6V1G1,BICD2,BTF3,C1orf43,CALM2,CALR,CAP1,CAPG,CAST,CCDC47,CCNI,C…	ENSG00000111275,ENSG00000165272,ENSG00000178363,ENSG00000143320,ENSG00000155368,ENSG00000116133,ENSG00000161249,ENSG00000134755,ENSG00000134762,ENSG00000134760,ENSG00000096696,ENSG00000213853,ENSG00000089356,ENSG00000139433,ENSG00000084207,ENSG00000141401,ENSG00000173801,ENSG00000102554,ENSG00000167768,ENSG00000205420,ENSG00000159166,ENSG00000167656,ENSG00000124466,ENSG00000112378,ENSG00000081277…
Keratinocyte	Regulon30	ZN770	0.664663	0	ALDH2,ALDH3B2,AQP3,C19orf33,CA12,CALML3,CLCA2,CRABP2,DBI,DHCR24,DMKN,DSC3,DSG1,DSP,EMP2,FXYD3,GJB2,GLTP,GSTP1,IMPA2,JUP,KLF5,KRT1,KRT10,KRT16,KRT6A,KRTDAP,LAD1,LY6D,LYPD3,NSG1,PERP,PKP1,PKP3,PTPRF,RAB25,RHOV,S100A14,S100A16,S100A7,S100A8,S100A9,SBSN,SDC1,SERPINB5,SFN,SLC2A1,SLPI,TACSTD2,TMEM45A,TRIM29,ABLIM1,ACTB,ACTR2,ACTR3,ADAMTSL4-AS1,AHCY,ALDOA,ANKRD12,ANP32B,AP2S1,APLP2,APRT,ARF1,ARL8B,ARPC2…	ENSG00000111275,ENSG00000132746,ENSG00000165272,ENSG00000167644,ENSG00000074410,ENSG00000178363,ENSG00000137975,ENSG00000143320,ENSG00000155368,ENSG00000116133,ENSG00000161249,ENSG00000134762,ENSG00000134760,ENSG00000096696,ENSG00000213853,ENSG00000089356,ENSG00000165474,ENSG00000139433,ENSG00000084207,ENSG00000141401,ENSG00000173801,ENSG00000102554,ENSG00000167768,ENSG00000186395,ENSG00000186832…
Keratinocyte	Regulon31	PITX2	0.664579	0	GSTP1,KLF5,KRT1,LYPD3,PKP1,RHOV,S100A9,SERPINB5,TACSTD2,ABLIM1,AHCY,AK2,APRT,ATP6V1F,CAST,CCT3,CCT6A,CDKN1A,CFL1,CNBP,COX4I1,COX6A1,COX6B1,COX7B,COX7C,CSDE1,CSTB,CTSD,CYC1,DDX1,DDX21,EBNA1BP2,EDF1,EIF3A,EIF3I,EIF3L,EIF3M,EIF4G1,EIF5,GDI2,GLO1,GM2A,GNA15,GRN,GUK1,HNRNPAB,HNRNPC,HNRNPK,HNRNPM,HSD17B10,HSPB1,IFITM3,ITM2B,LAMP1,MPZL2,MRFAP1,MYL12B,NAPA,NDUFB2,NDUFS5,NPM1,P4HB,PA2G4,PEBP1,PFDN5,PKM,PL…	ENSG00000084207,ENSG00000102554,ENSG00000167768,ENSG00000124466,ENSG00000081277,ENSG00000104140,ENSG00000163220,ENSG00000206075,ENSG00000184292,ENSG00000099204,ENSG00000101444,ENSG00000004455,ENSG00000198931,ENSG00000128524,ENSG00000153113,ENSG00000163468,ENSG00000146731,ENSG00000124762,ENSG00000172757,ENSG00000169714,ENSG00000131143,ENSG00000111775,ENSG00000126267,ENSG00000131174,ENSG00000127184…
Keratinocyte	Regulon32	VEZF1	0.656506	0	ALDH2,AQP3,CALML3,CLCA2,CRABP2,DBI,DMKN,DSC3,DSG1,DSP,EMP2,FXYD3,GLTP,GSTP1,JUP,KLF5,KRT1,KRT10,KRT6A,KRTDAP,LAD1,LY6D,PERP,PKP1,S100A14,S100A16,S100A7,S100A8,S100A9,SDC1,SERPINB5,SFN,TACSTD2,TRIM29,ABLIM1,ACTB,ACTR2,ACTR3,ADAMTSL4-AS1,AKAP9,ALDOA,ANP32B,ANXA1,APLP2,APRT,ARF1,ARPC2,ARPC5,ARPC5L,ATF4,ATP1A1,ATP1B3,ATP6V1G1,BAG3,BTF3,C1orf43,CALM2,CALR,CAP1,CAST,CCDC47,CCNI,CCT2,CCT3,CCT6A,CD44,CD8…	ENSG00000111275,ENSG00000165272,ENSG00000178363,ENSG00000137975,ENSG00000143320,ENSG00000155368,ENSG00000161249,ENSG00000134762,ENSG00000134760,ENSG00000096696,ENSG00000213853,ENSG00000089356,ENSG00000139433,ENSG00000084207,ENSG00000173801,ENSG00000102554,ENSG00000167768,ENSG00000186395,ENSG00000205420,ENSG00000188508,ENSG00000159166,ENSG00000167656,ENSG00000112378,ENSG00000081277,ENSG00000189334…
Lymphatic	Regulon1	SP1	0.238647	0.121	ANXA5,CD63,FTH1,FTL,LGALS1,RAB31,S100A6	ENSG00000164111,ENSG00000135404,ENSG00000167996,ENSG00000087086,ENSG00000100097,ENSG00000168461,ENSG00000197956
Mast	Regulon1	ZN148	0.681522	0	ANXA1,ARHGAP18,BMP2K,CD44,CPA3,CTSG,FTH1,GLUL,KIT,LAPTM5,LGALS3,SRGN,TPSAB1,FTL	ENSG00000135046,ENSG00000146376,ENSG00000138756,ENSG00000026508,ENSG00000163751,ENSG00000100448,ENSG00000167996,ENSG00000135821,ENSG00000157404,ENSG00000162511,ENSG00000131981,ENSG00000122862,ENSG00000172236,ENSG00000087086
Mast	Regulon2	SP2	0.236446	1	ACTG1,ANXA2,BTG1,DDX5,EIF4G2,FAU,HNRNPA2B1,MALAT1,NACA,NCL,OAZ1,PRRC2C,PTMA,RPL12,RPL13A,RPL15,RPL18,RPL23,RPL27,RPL27A,RPL31,RPL32,RPL34,RPL35A,RPL37A,RPL4,RPL5,RPLP2,RPS13,RPS16,RPS19,RPS20,RPS21,RPS23,RPS24,YWHAB	ENSG00000184009,ENSG00000182718,ENSG00000133639,ENSG00000108654,ENSG00000110321,ENSG00000149806,ENSG00000122566,ENSG00000251562,ENSG00000196531,ENSG00000115053,ENSG00000104904,ENSG00000117523,ENSG00000187514,ENSG00000197958,ENSG00000142541,ENSG00000174748,ENSG00000063177,ENSG00000125691,ENSG00000131469,ENSG00000166441,ENSG00000071082,ENSG00000144713,ENSG00000109475,ENSG00000182899,ENSG00000197756…
Myeloid	Regulon1	CPEB1	0.303765	0.135	BAG3,DNAJA1,FTL,HSPA8,HSPB1,HSPH1,ID2	ENSG00000151929,ENSG00000086061,ENSG00000087086,ENSG00000109971,ENSG00000106211,ENSG00000120694,ENSG00000115738
Myeloid	Regulon2	SP3	0.297966	0.168	BAG3,DNAJA1,DNAJB1,FTL,HSPA8,HSPB1,HSPD1,HSPH1,ID2	ENSG00000151929,ENSG00000086061,ENSG00000132002,ENSG00000087086,ENSG00000109971,ENSG00000106211,ENSG00000144381,ENSG00000120694,ENSG00000115738
Myeloid	Regulon3	PRDM6	0.271107	0.603	BAG3,GADD45B,HSPB1,HSPH1,NR4A1	ENSG00000151929,ENSG00000099860,ENSG00000106211,ENSG00000120694,ENSG00000123358
Plasma	Regulon1	ZN341	0.16828	1	ACTG1,ANXA2,BTG1,DDX5,EIF1,EIF4G2,FAU,HNRNPA2B1,HSP90AA1,HSP90AB1,HSPA5,JUN,NCL,NFKBIA,OAZ1,PPP1R15A,PTMA,RPL12,RPL13,RPL13A,RPL15,RPL18,RPL19,RPL23,RPL27,RPL27A,RPL3,RPL30,RPL31,RPL32,RPL34,RPL35,RPL35A,RPL37A,RPL4,RPL5,RPLP0,RPLP2,RPS12,RPS13,RPS14,RPS16,RPS19,RPS20,RPS21,RPS23,RPS24,RPS5,UBA52,UBB,UBC	ENSG00000184009,ENSG00000182718,ENSG00000133639,ENSG00000108654,ENSG00000173812,ENSG00000110321,ENSG00000149806,ENSG00000122566,ENSG00000080824,ENSG00000096384,ENSG00000044574,ENSG00000177606,ENSG00000115053,ENSG00000100906,ENSG00000104904,ENSG00000087074,ENSG00000187514,ENSG00000197958,ENSG00000167526,ENSG00000142541,ENSG00000174748,ENSG00000063177,ENSG00000108298,ENSG00000125691,ENSG00000131469…
Plasma	Regulon2	KAISO	0.168212	1	NCL,PRRC2C,RPL13,RPL27,RPL27A,RPL4,RPS13,RPS19,RPS21	ENSG00000115053,ENSG00000117523,ENSG00000167526,ENSG00000131469,ENSG00000166441,ENSG00000174444,ENSG00000110700,ENSG00000105372,ENSG00000171858
Plasma	Regulon3	MAZ	0.16821	1	ANXA2,BTG1,DDX5,EIF1,EIF4G2,FAU,HNRNPA2B1,HSPA5,JUN,KLF6,NACA,NCL,NFKBIA,OAZ1,PPP1R15A,PTMA,RPL12,RPL13A,RPL15,RPL18,RPL23,RPL27,RPL27A,RPL3,RPL30,RPL31,RPL32,RPL34,RPL35,RPL35A,RPL37A,RPL4,RPL5,RPLP0,RPS13,RPS20,RPS23,RPS24,RPS5,UBA52,UBB,UBC	ENSG00000182718,ENSG00000133639,ENSG00000108654,ENSG00000173812,ENSG00000110321,ENSG00000149806,ENSG00000122566,ENSG00000044574,ENSG00000177606,ENSG00000067082,ENSG00000196531,ENSG00000115053,ENSG00000100906,ENSG00000104904,ENSG00000087074,ENSG00000187514,ENSG00000197958,ENSG00000142541,ENSG00000174748,ENSG00000063177,ENSG00000125691,ENSG00000131469,ENSG00000166441,ENSG00000100316,ENSG00000156482…
Plasma	Regulon4	HXD13	0.168133	1	FAU,PPP1R15A,RPL23,RPL30,RPL32,RPL35,RPLP0,RPS13,UBA52,UBB	ENSG00000149806,ENSG00000087074,ENSG00000125691,ENSG00000156482,ENSG00000144713,ENSG00000136942,ENSG00000089157,ENSG00000110700,ENSG00000221983,ENSG00000170315
Plasma	Regulon5	RXRA	0.16808	1	ACTB,ACTG1,AHNAK,ALDH2,ALDOA,APLP2,AQP3,ARPC2,ATF4,ATP1A1,ATP2A2,ATP6V1G1,BTF3,CAP1,CAST,CCNI,CCT3,CD44,CDKN1A,CFL1,CNBP,COX4I1,COX5B,COX6B1,COX7C,CRABP2,CSDE1,CSNK1A1,CSTB,CYC1,DDX17,DDX21,DMKN,DSC3,DSP,DSTN,DYNLL1,EDF1,EEF1A1,EHF,EIF1,EIF3A,EIF4G1,EIF4G2,EIF5,EIF5B,EMP1,EMP2,ENO1,ENSA,EZR,FAU,FGFBP1,FXYD3,GJA1,GJB2,GLO1,GLTP,GOLGA4,GSTP1,GUK1,HDGF,HINT1,HNRNPAB,HNRNPK,HNRNPU,HSPA8,HSPB1,IFI16,I…	ENSG00000075624,ENSG00000184009,ENSG00000124942,ENSG00000111275,ENSG00000149925,ENSG00000084234,ENSG00000165272,ENSG00000163466,ENSG00000128272,ENSG00000163399,ENSG00000174437,ENSG00000136888,ENSG00000145741,ENSG00000131236,ENSG00000153113,ENSG00000118816,ENSG00000163468,ENSG00000026508,ENSG00000124762,ENSG00000172757,ENSG00000169714,ENSG00000131143,ENSG00000135940,ENSG00000126267,ENSG00000127184…
Plasma	Regulon6	ZN770	0.168078	1	ABLIM1,ACTB,ACTG1,ACTR2,ACTR3,ADAMTSL4-AS1,AHCY,AK2,AKR1B10,ALDH2,ALDOA,ANP32B,ANXA2,AP2S1,APLP2,APRT,AQP3,ARF1,ARL8B,ARPC2,ARPC5L,ATF3,ATF4,ATP1A1,ATP1B3,ATP6V1F,ATP6V1G1,BRK1,BTF3,BTG1,C19orf33,C1orf43,C6orf132,CA12,CALM2,CALML3,CALR,CAMLG,CAP1,CAPG,CAPN1,CAPZB,CAST,CBR1,CCDC47,CCNI,CCT2,CCT3,CCT6A,CCT8,CD44,CDC42,CDH1,CDKN1A,CEBPD,CFL1,CHCHD2,CHD4,CHMP2A,CKAP4,CLCA2,CLTA,CLTB,CLUH,CNBP,COX4I1,…	ENSG00000099204,ENSG00000075624,ENSG00000184009,ENSG00000138071,ENSG00000115091,ENSG00000143384,ENSG00000101444,ENSG00000004455,ENSG00000198074,ENSG00000111275,ENSG00000149925,ENSG00000136938,ENSG00000182718,ENSG00000042753,ENSG00000084234,ENSG00000198931,ENSG00000165272,ENSG00000143761,ENSG00000134108,ENSG00000163466,ENSG00000136950,ENSG00000162772,ENSG00000128272,ENSG00000163399,ENSG00000069849…
Plasma	Regulon7	SP1	0.168038	1	ABLIM1,ACTB,ACTG1,ACTR2,ACTR3,AKR1B10,ALDH2,ALDOA,ANP32B,ANXA2,APRT,AQP3,ARF1,ARPC2,ARPC5L,ATF4,ATP1A1,ATP1B3,ATP6V1G1,BRK1,BTF3,BTG1,C19orf33,C1orf43,CA12,CALM2,CALML3,CALR,CAP1,CAPG,CCNI,CCT2,CCT3,CCT6A,CD44,CD81,CD82,CDKN1A,CFL1,CHCHD2,CLTA,CLTB,CNBP,COX4I1,COX5B,COX6A1,COX6B1,COX6C,COX8A,CRABP2,CSDE1,CSNK1A1,CSTB,CTNNA1,CTSD,CYC1,DBI,DDX1,DDX21,DDX3X,DDX5,DHCR24,DMKN,DNAJB1,DNTTIP2,DSC2,DSC3,…	ENSG00000099204,ENSG00000075624,ENSG00000184009,ENSG00000138071,ENSG00000115091,ENSG00000198074,ENSG00000111275,ENSG00000149925,ENSG00000136938,ENSG00000182718,ENSG00000198931,ENSG00000165272,ENSG00000143761,ENSG00000163466,ENSG00000136950,ENSG00000128272,ENSG00000163399,ENSG00000069849,ENSG00000136888,ENSG00000254999,ENSG00000145741,ENSG00000133639,ENSG00000167644,ENSG00000143612,ENSG00000074410…
Plasma	Regulon8	PITX2	0.167957	1	ABLIM1,AHCY,AK2,APRT,ATP6V1F,CAST,CCT2,CCT3,CCT6A,CDKN1A,CFL1,CNBP,COX4I1,COX6A1,COX6B1,COX7B,COX7C,CSDE1,CSTB,CTSD,CYC1,DDX1,DDX21,EBNA1BP2,EDF1,EIF3A,EIF3I,EIF3L,EIF3M,EIF4B,EIF4G1,EIF5,FAU,FUS,GDI2,GLO1,GM2A,GNA15,GRN,GSTP1,GUK1,HNRNPAB,HNRNPC,HNRNPK,HNRNPM,HSD17B10,HSPB1,IFITM3,ILF2,ITM2B,KLF5,KPNB1,KRT1,LAMP1,LYPD3,METAP2,MPZL2,MRFAP1,MYL12B,NAPA,NDUFB2,NDUFS5,NDUFV1,NPM1,P4HB,PA2G4,PCBP2,PD…	ENSG00000099204,ENSG00000101444,ENSG00000004455,ENSG00000198931,ENSG00000128524,ENSG00000153113,ENSG00000166226,ENSG00000163468,ENSG00000146731,ENSG00000124762,ENSG00000172757,ENSG00000169714,ENSG00000131143,ENSG00000111775,ENSG00000126267,ENSG00000131174,ENSG00000127184,ENSG00000009307,ENSG00000160213,ENSG00000117984,ENSG00000179091,ENSG00000079785,ENSG00000165732,ENSG00000117395,ENSG00000107223…
Plasma	Regulon9	CPEB1	0.167899	1	ABLIM1,AKR1B10,ALDH2,ANXA2,AP2S1,APRT,AQP3,ATP6V1G1,BMPR2,BRK1,BTG1,CA12,CAMLG,CAST,CBR1,CCT2,CCT3,CCT6A,CD93,CDKN1A,CFL1,CHCHD2,CLIC4,CLTB,CNBP,COX4I1,COX6A1,COX6B1,COX8A,CSNK1A1,CSTA,CSTB,CTSD,CYC1,DDX1,DDX21,DEGS1,DMKN,DSG1,DSG3,EDF1,EHF,EIF3A,EIF3L,EIF3M,EIF4B,EIF4G1,EIF5,EIF5B,EMP1,EPAS1,FAU,G3BP1,GHITM,GJA1,GLO1,GM2A,GNA15,GRN,GSTP1,GUK1,HDLBP,HEBP2,HINT1,HK1,HNRNPAB,HNRNPC,HNRNPD,HNRNPM,HN…	ENSG00000099204,ENSG00000198074,ENSG00000111275,ENSG00000182718,ENSG00000042753,ENSG00000198931,ENSG00000165272,ENSG00000136888,ENSG00000204217,ENSG00000254999,ENSG00000133639,ENSG00000074410,ENSG00000164615,ENSG00000153113,ENSG00000159228,ENSG00000166226,ENSG00000163468,ENSG00000146731,ENSG00000125810,ENSG00000124762,ENSG00000172757,ENSG00000106153,ENSG00000169504,ENSG00000175416,ENSG00000169714…
Plasma	Regulon10	PATZ1	0.167868	1	ABLIM1,ACTB,AKR1B10,ALDH2,ALDOA,AP2S1,APRT,AQP3,ARF1,ARPC2,ARPC5L,ATF4,ATP1B3,ATP6V1G1,BCAP31,BTF3,CALM2,CALML3,CALR,CAP1,CAPG,CAPN1,CAST,CCDC47,CCNI,CCT3,CCT6A,CD44,CD82,CDH1,CDKN1A,CFL1,CHCHD2,CLCA2,CLTA,CLTB,CNBP,COX4I1,COX5B,COX6B1,COX6C,COX7A2,COX7C,COX8A,CSDE1,CSNK1A1,CTNNA1,CYC1,DBI,DDX1,DDX21,DDX3X,DHCR24,DMKN,DSC3,DSP,DSTN,DYNLL1,EBNA1BP2,EDF1,EEF1A1,EIF3A,EIF3H,EIF3M,EIF4A1,EIF4G1,EIF5,…	ENSG00000099204,ENSG00000075624,ENSG00000198074,ENSG00000111275,ENSG00000149925,ENSG00000042753,ENSG00000198931,ENSG00000165272,ENSG00000143761,ENSG00000163466,ENSG00000136950,ENSG00000128272,ENSG00000069849,ENSG00000136888,ENSG00000185825,ENSG00000145741,ENSG00000143933,ENSG00000178363,ENSG00000179218,ENSG00000131236,ENSG00000042493,ENSG00000014216,ENSG00000153113,ENSG00000108588,ENSG00000118816…
Plasma	Regulon11	VEZF1	0.167859	1	ACTB,ACTG1,ADAMTSL4-AS1,ALDOA,ANXA1,ANXA2,APLP2,ARF1,ARPC2,ARPC5,ATF4,ATP1A1,BAG3,BTF3,BTG1,CCNI,CDKN1A,CFL1,CNBP,COX4I1,DDX21,DDX3X,DDX5,DNAJA1,DNAJB1,DSTN,DYNLL1,EIF3A,EIF3H,EIF3L,EIF4B,EIF4G1,EIF4G2,EMP1,ENO1,FAU,GUK1,HINT1,HNRNPA2B1,HNRNPC,HNRNPM,HNRNPU,HSPA8,HSPB1,HSPD1,HSPH1,IFI16,IQGAP1,KTN1,MALAT1,MCL1,MRFAP1,MTDH,MYH9,MYL12B,NACA,NCL,NUCKS1,OAZ1,PAPOLA,PCBP1,PEBP1,PFDN5,PGK1,PKM,PPIB,PRD…	ENSG00000075624,ENSG00000184009,ENSG00000143384,ENSG00000149925,ENSG00000135046,ENSG00000182718,ENSG00000084234,ENSG00000143761,ENSG00000163466,ENSG00000162704,ENSG00000128272,ENSG00000163399,ENSG00000151929,ENSG00000145741,ENSG00000133639,ENSG00000118816,ENSG00000124762,ENSG00000172757,ENSG00000169714,ENSG00000131143,ENSG00000165732,ENSG00000215301,ENSG00000108654,ENSG00000086061,ENSG00000132002…
Plasma	Regulon12	SP3	0.167858	1	ACTB,ALDH2,ALDOA,APLP2,APP,AQP3,ARPC2,ATP1A1,ATP2A2,ATP6V1G1,BMPR2,BTF3,CAP1,CCNI,CCT3,CD44,CD74,CD93,CDKN1A,CFL1,CLIC4,CNBP,COL15A1,COL4A1,COX4I1,COX5B,COX6B1,CRABP2,CSDE1,CSNK1A1,CSTB,CYC1,DDX17,DDX21,DMKN,DSC3,DSG3,DSP,DSTN,DYNLL1,ECE1,EDF1,EEF1A1,EHF,EIF3A,EIF4G1,EIF5,EIF5B,EMP1,EMP2,ENO1,ENSA,ETS1,EZR,FGFBP1,FLT1,FSTL1,FXYD3,GJB2,GLO1,GLTP,GOLGA4,GSTP1,GUK1,HDGF,HINT1,HNRNPAB,HNRNPK,HSPA8,HS…	ENSG00000075624,ENSG00000111275,ENSG00000149925,ENSG00000084234,ENSG00000142192,ENSG00000165272,ENSG00000163466,ENSG00000163399,ENSG00000174437,ENSG00000136888,ENSG00000204217,ENSG00000145741,ENSG00000131236,ENSG00000118816,ENSG00000163468,ENSG00000026508,ENSG00000019582,ENSG00000125810,ENSG00000124762,ENSG00000172757,ENSG00000169504,ENSG00000169714,ENSG00000204291,ENSG00000187498,ENSG00000131143…
Plasma	Regulon13	WT1	0.167839	1	ADAMTSL4-AS1,ANXA1,APLP2,APP,ARPC2,ATF3,ATF4,BAG3,CAST,CAV1,CCNI,CD59,CD81,COL4A1,COX4I1,CSDE1,CYB5R3,DDX3X,DNAJA1,DNAJB1,DSTN,EID1,EIF5,ENO1,FOS,FTL,GADD45B,GNAI2,GNG11,GSN,HNRNPU,HSPA8,HSPB1,HSPD1,HSPE1,HSPH1,IER5,IFITM3,IGFBP4,IL6ST,ITGB1,JAK1,LGALS3,MBNL1,MCL1,MTDH,PFDN5,PPP3CA,PRSS23,PTTG1IP,RAC1,RBM25,RBM3,RHOA,RHOB,RPL24,RPL28,RPL37,RPL38,RPS2,RPS27A,S100A10,S100A6,SERF2,SON,SPARC,SPTBN1,T…	ENSG00000143384,ENSG00000135046,ENSG00000084234,ENSG00000142192,ENSG00000163466,ENSG00000162772,ENSG00000128272,ENSG00000151929,ENSG00000153113,ENSG00000105974,ENSG00000118816,ENSG00000085063,ENSG00000110651,ENSG00000187498,ENSG00000131143,ENSG00000009307,ENSG00000100243,ENSG00000215301,ENSG00000086061,ENSG00000132002,ENSG00000125868,ENSG00000255302,ENSG00000100664,ENSG00000074800,ENSG00000170345…
Plasma	Regulon14	ZFX	0.167834	1	ACTB,ALDH2,ALDH3B2,ALDOA,AP2S1,APLP2,APRT,AQP3,ARF1,ARPC2,ARPC5,ARPC5L,ATF4,ATP1B3,ATP6V1F,ATP6V1G1,BTF3,CA12,CALM2,CALML3,CALR,CAP1,CAPG,CAPN1,CAPZB,CCDC47,CCNI,CCT3,CD44,CD82,CDH1,CDKN1A,CFL1,CHCHD2,CLTA,CLTB,CNBP,COPS6,COX4I1,COX5B,COX6B1,COX6C,COX7B,COX7C,COX8A,CRABP2,CSDE1,CSNK1A1,CST3,CSTB,CTNNA1,CTSD,CYC1,CYCS,DBI,DDX21,DHCR24,DMKN,DNTTIP2,DSC3,DSP,DSTN,DYNLL1,EBNA1BP2,EDF1,EEA1,EEF1A1,EIF…	ENSG00000075624,ENSG00000111275,ENSG00000132746,ENSG00000149925,ENSG00000042753,ENSG00000084234,ENSG00000198931,ENSG00000165272,ENSG00000143761,ENSG00000163466,ENSG00000162704,ENSG00000136950,ENSG00000128272,ENSG00000069849,ENSG00000128524,ENSG00000136888,ENSG00000145741,ENSG00000074410,ENSG00000143933,ENSG00000178363,ENSG00000179218,ENSG00000131236,ENSG00000042493,ENSG00000014216,ENSG00000077549…
Plasma	Regulon15	SP2	0.167714	1	ACTB,ADAMTSL4-AS1,ALDOA,ARF1,ARPC2,ATF3,ATF4,ATP1A1,BAG3,BTF3,CCNI,CDKN1A,CFL1,CNBP,COX4I1,COX5B,CSDE1,CTNNA1,DDX17,DDX3X,DNAJA1,DNAJB1,DYNLL1,EEF1A1,EIF3A,EIF3L,EIF5,EMP1,ENO1,ETS2,FOSB,GAS5,GBP2,GUK1,HNRNPK,HNRNPU,HSPA8,HSPB1,HSPH1,IFITM3,IQGAP1,ITM2B,JUND,KTN1,LAPTM4A,LGALS3,MATR3,MCL1,MRFAP1,MTDH,NDRG1,NFKBIZ,NUCKS1,P4HB,PCBP1,PFDN5,PGK1,PKM,PNRC1,PRDX1,PSMB4,RAC1,RBM3,RHOA,RPL10A,RPL14,RPL24…	ENSG00000075624,ENSG00000143384,ENSG00000149925,ENSG00000143761,ENSG00000163466,ENSG00000162772,ENSG00000128272,ENSG00000163399,ENSG00000151929,ENSG00000145741,ENSG00000118816,ENSG00000124762,ENSG00000172757,ENSG00000169714,ENSG00000131143,ENSG00000135940,ENSG00000009307,ENSG00000044115,ENSG00000100201,ENSG00000215301,ENSG00000086061,ENSG00000132002,ENSG00000088986,ENSG00000156508,ENSG00000107581…
Plasma	Regulon16	PRDM6	0.167713	1	ABLIM1,ACTB,ACTR2,ACTR3,CCT2,CLTA,COX4I1,COX7C,DDX21,EIF3A,FUS,HEBP2,HNRNPC,HNRNPM,IQGAP1,LGALS3,MSN,PCBP2,PDIA3,PDIA6,PEBP1,PFDN5,PRDX1,PSMB4,RPL14,RPL26,RPL6,SET,SLK,SNHG5	ENSG00000099204,ENSG00000075624,ENSG00000138071,ENSG00000115091,ENSG00000166226,ENSG00000122705,ENSG00000131143,ENSG00000127184,ENSG00000165732,ENSG00000107581,ENSG00000089280,ENSG00000051620,ENSG00000092199,ENSG00000099783,ENSG00000140575,ENSG00000131981,ENSG00000147065,ENSG00000197111,ENSG00000167004,ENSG00000143870,ENSG00000089220,ENSG00000123349,ENSG00000117450,ENSG00000159377,ENSG00000188846…
Plasma	Regulon17	ZN467	0.167636	1	ACTB,AEBP1,ANXA5,APP,CALU,CAV1,CCNI,CD63,CD81,CD99,CDH11,CIRBP,CKAP4,CLU,CNN3,COL18A1,COL1A1,COL1A2,COL3A1,COL5A1,COL6A1,COL6A2,COL6A3,COX6C,CST3,CTSK,CYBRD1,DAB2,EMP1,ENO1,FBLN2,FBN1,FGFR1,FSTL1,FTH1,FTL,GPX4,GSN,HDLBP,HSPG2,HTRA1,IFITM3,IGFBP4,IGFBP7,IL1R1,IL6ST,ITGB5,LAMA4,LAMC1,LAPTM4A,LGALS1,LGALS3,LGALS3BP,LPAR1,LRP1,LTBP1,MAP4,MFAP4,MMP2,MXRA5,NDUFA4,NFIX,NNMT,NUCKS1,OLFML3,PCOLCE,PDIA6,PG…	ENSG00000075624,ENSG00000106624,ENSG00000164111,ENSG00000142192,ENSG00000128595,ENSG00000105974,ENSG00000118816,ENSG00000135404,ENSG00000110651,ENSG00000002586,ENSG00000140937,ENSG00000099622,ENSG00000136026,ENSG00000120885,ENSG00000117519,ENSG00000182871,ENSG00000108821,ENSG00000164692,ENSG00000168542,ENSG00000130635,ENSG00000142156,ENSG00000142173,ENSG00000163359,ENSG00000164919,ENSG00000101439…
Schwann	Regulon1	ZN467	0.168063	1	ACTB,AEBP1,ANXA5,APP,CALU,CAV1,CCNI,CD63,CD81,CD99,CDH11,CIRBP,CKAP4,CLU,CNN3,COL18A1,COL1A1,COL1A2,COL3A1,COL5A1,COL6A1,COL6A2,COL6A3,COX6C,CST3,CTSK,CYBRD1,DAB2,EMP1,ENO1,FBLN2,FBN1,FGFR1,FSTL1,FTH1,FTL,GPX4,GSN,HDLBP,HSPG2,HTRA1,IFITM3,IGFBP4,IGFBP7,IL1R1,IL6ST,ITGB5,LAMA4,LAMC1,LAPTM4A,LGALS1,LGALS3,LGALS3BP,LPAR1,LRP1,LTBP1,MAP4,MFAP4,MMP2,MXRA5,NDUFA4,NFIX,NNMT,NUCKS1,OLFML3,PCOLCE,PDIA6,PG…	ENSG00000075624,ENSG00000106624,ENSG00000164111,ENSG00000142192,ENSG00000128595,ENSG00000105974,ENSG00000118816,ENSG00000135404,ENSG00000110651,ENSG00000002586,ENSG00000140937,ENSG00000099622,ENSG00000136026,ENSG00000120885,ENSG00000117519,ENSG00000182871,ENSG00000108821,ENSG00000164692,ENSG00000168542,ENSG00000130635,ENSG00000142156,ENSG00000142173,ENSG00000163359,ENSG00000164919,ENSG00000101439…
Schwann	Regulon2	PATZ1	0.167835	1	A2M,ANXA1,APP,ATF4,ATP1A1,BMPR2,CAV1,CCDC50,CCNI,CD59,CD63,CD74,CD81,CD93,CLIC4,COL15A1,COL4A1,ECE1,EMCN,EMP1,ENG,ENO1,EPAS1,ETS1,ETS2,FLT1,FSTL1,GNAI2,HSPA8,HSPG2,IFITM2,IFITM3,IGFBP7,IL6ST,ITGA5,ITGA6,ITGB1,JAK1,KTN1,LAMC1,LGALS3,MACF1,MSN,MYH9,NDRG1,NRP1,PDLIM1,PEA15,PLVAP,PRSS23,PTTG1IP,RHOA,RTN4,S100A10,S100A6,SH3BP5,SPARC,SPARCL1,SPTBN1,STOM,SWAP70,TCF4,TGFBR2,TM4SF1,TM9SF3,TPM4,VWF,WWTR1,Y…	ENSG00000175899,ENSG00000135046,ENSG00000142192,ENSG00000128272,ENSG00000163399,ENSG00000204217,ENSG00000105974,ENSG00000152492,ENSG00000118816,ENSG00000085063,ENSG00000135404,ENSG00000019582,ENSG00000110651,ENSG00000125810,ENSG00000169504,ENSG00000204291,ENSG00000187498,ENSG00000117298,ENSG00000164035,ENSG00000134531,ENSG00000106991,ENSG00000074800,ENSG00000116016,ENSG00000134954,ENSG00000157557…
Schwann	Regulon3	WT1	0.167764	1	ADAMTSL4-AS1,ANXA1,APLP2,APP,ARPC2,ATF3,ATF4,BAG3,CAST,CAV1,CCNI,CD59,CD81,COL4A1,COX4I1,CSDE1,CYB5R3,DDX3X,DNAJA1,DNAJB1,DSTN,EID1,EIF5,ENO1,FOS,FTL,GADD45B,GNAI2,GNG11,GSN,HNRNPU,HSPA8,HSPB1,HSPD1,HSPE1,HSPH1,IER5,IFITM3,IGFBP4,IL6ST,ITGB1,JAK1,LGALS3,MBNL1,MCL1,MTDH,PFDN5,PPP3CA,PRSS23,PTTG1IP,RAC1,RBM25,RBM3,RHOA,RHOB,RPL24,RPL28,RPL37,RPL38,RPS2,RPS27A,S100A10,S100A6,SERF2,SON,SPARC,SPTBN1,T…	ENSG00000143384,ENSG00000135046,ENSG00000084234,ENSG00000142192,ENSG00000163466,ENSG00000162772,ENSG00000128272,ENSG00000151929,ENSG00000153113,ENSG00000105974,ENSG00000118816,ENSG00000085063,ENSG00000110651,ENSG00000187498,ENSG00000131143,ENSG00000009307,ENSG00000100243,ENSG00000215301,ENSG00000086061,ENSG00000132002,ENSG00000125868,ENSG00000255302,ENSG00000100664,ENSG00000074800,ENSG00000170345…
Schwann	Regulon4	SP2	0.167631	1	ABLIM1,ACTB,ACTR2,ACTR3,ALDOA,ANP32B,ARF1,ARHGDIA,ARPC2,ARPC5L,ATF4,ATP1B3,C1orf43,CALM2,CALR,CCDC47,CCNI,CCT2,CCT6A,CD81,CFL1,CLTA,CNBP,COX4I1,COX5B,CSDE1,DDX21,DDX3X,DSTN,DYNLL1,EEF1A1,EIF3A,EIF3H,EIF3L,EIF4B,EIF4G1,EIF5,EMP1,ENO1,FUS,G3BP1,GDI2,GNB1,GUK1,HADHA,HDLBP,HEBP2,HINT1,HNRNPC,HNRNPDL,HNRNPF,HNRNPM,HSPA8,HSPA9,HSPB1,IFITM3,ILF2,IQGAP1,KPNB1,KTN1,LGALS3,LRRFIP1,MBD2,METAP2,MRFAP1,MSN,MY…	ENSG00000099204,ENSG00000075624,ENSG00000138071,ENSG00000115091,ENSG00000149925,ENSG00000136938,ENSG00000143761,ENSG00000141522,ENSG00000163466,ENSG00000136950,ENSG00000128272,ENSG00000069849,ENSG00000143612,ENSG00000143933,ENSG00000179218,ENSG00000108588,ENSG00000118816,ENSG00000166226,ENSG00000146731,ENSG00000110651,ENSG00000172757,ENSG00000122705,ENSG00000169714,ENSG00000131143,ENSG00000135940…
Schwann	Regulon5	CPEB1	0.167621	1	ABLIM1,ALDH2,ANXA2,AP2S1,APRT,AQP3,ATP6V1G1,BRK1,BTG1,C1S,CA12,CAMLG,CAST,CBR1,CCT2,CCT3,CDKN1A,CFL1,CHCHD2,CIRBP,CLTB,CNBP,COL6A3,COX4I1,COX6A1,COX6B1,COX8A,CSNK1A1,CSTB,CTR9,CTSD,CYC1,DDX1,DDX17,DDX21,DEGS1,DMKN,EDF1,EID1,EIF3A,EIF3L,EIF4B,EIF4G1,EIF5,EIF5B,EMP1,FAU,G3BP1,GHITM,GJA1,GM2A,GNA15,GNG11,GPX4,GRN,GSN,GSTP1,GUK1,HDLBP,HEBP2,HINT1,HK1,HNRNPAB,HNRNPC,HNRNPD,HNRNPM,HSP90AA1,HSPA4L,HSPB1…	ENSG00000099204,ENSG00000111275,ENSG00000182718,ENSG00000042753,ENSG00000198931,ENSG00000165272,ENSG00000136888,ENSG00000254999,ENSG00000133639,ENSG00000182326,ENSG00000074410,ENSG00000164615,ENSG00000153113,ENSG00000159228,ENSG00000166226,ENSG00000163468,ENSG00000124762,ENSG00000172757,ENSG00000106153,ENSG00000099622,ENSG00000175416,ENSG00000169714,ENSG00000163359,ENSG00000131143,ENSG00000111775…
Schwann	Regulon6	ZN770	0.167583	1	ABLIM1,ACTB,ACTG1,ACTR2,ACTR3,ADAMTSL4-AS1,AHCY,AHNAK,AK2,AKR1B10,ALDH2,ALDH3B2,ALDOA,ANP32B,ANXA2,AP2S1,APLP2,APRT,AQP3,ARF1,ARPC2,ARPC5,ARPC5L,ATF3,ATF4,ATP1A1,ATP1B3,ATP6V1F,ATP6V1G1,BRK1,BTF3,BTG1,C19orf33,C1orf43,C6orf132,CA12,CALM2,CALML3,CALR,CAMLG,CAP1,CAPG,CAPN1,CAPZB,CAST,CBR1,CCDC47,CCNI,CCT2,CCT3,CCT6A,CD44,CD82,CDC42,CDH1,CDKN1A,CEBPD,CFL1,CHCHD2,CHD4,CHMP2A,CKAP4,CLCA2,CLTA,CLTB,CNB…	ENSG00000099204,ENSG00000075624,ENSG00000184009,ENSG00000138071,ENSG00000115091,ENSG00000143384,ENSG00000101444,ENSG00000124942,ENSG00000004455,ENSG00000198074,ENSG00000111275,ENSG00000132746,ENSG00000149925,ENSG00000136938,ENSG00000182718,ENSG00000042753,ENSG00000084234,ENSG00000198931,ENSG00000165272,ENSG00000143761,ENSG00000163466,ENSG00000162704,ENSG00000136950,ENSG00000162772,ENSG00000128272…
Schwann	Regulon7	KAISO	0.167581	1	NCL,PRRC2C,RPL13,RPL27,RPL27A,RPL4,RPS13,RPS19,RPS21	ENSG00000115053,ENSG00000117523,ENSG00000167526,ENSG00000131469,ENSG00000166441,ENSG00000174444,ENSG00000110700,ENSG00000105372,ENSG00000171858
Schwann	Regulon8	PRDM6	0.167571	1	ABLIM1,ACTB,ACTR2,ACTR3,CCT2,CLTA,COX4I1,COX7C,DDX21,EIF3A,FUS,HEBP2,HNRNPC,HNRNPM,IQGAP1,LGALS3,MSN,PCBP2,PDIA3,PDIA6,PEBP1,PFDN5,PRDX1,PSMB4,RPL14,RPL26,RPL6,SET,SLK,SNHG5	ENSG00000099204,ENSG00000075624,ENSG00000138071,ENSG00000115091,ENSG00000166226,ENSG00000122705,ENSG00000131143,ENSG00000127184,ENSG00000165732,ENSG00000107581,ENSG00000089280,ENSG00000051620,ENSG00000092199,ENSG00000099783,ENSG00000140575,ENSG00000131981,ENSG00000147065,ENSG00000197111,ENSG00000167004,ENSG00000143870,ENSG00000089220,ENSG00000123349,ENSG00000117450,ENSG00000159377,ENSG00000188846…
Schwann	Regulon9	KLF12	0.167559	1	ACTG1,ANXA2,BTG1,DDX5,EIF4G2,HNRNPA2B1,MALAT1,NCL,OAZ1,PTMA,RPL12,RPL15,RPL18,RPL27A,RPL31,RPL37A,RPL4,RPLP2,RPS13,RPS16,RPS19,RPS20,RPS21,RPS23,YWHAB	ENSG00000184009,ENSG00000182718,ENSG00000133639,ENSG00000108654,ENSG00000110321,ENSG00000122566,ENSG00000251562,ENSG00000115053,ENSG00000104904,ENSG00000187514,ENSG00000197958,ENSG00000174748,ENSG00000063177,ENSG00000166441,ENSG00000071082,ENSG00000197756,ENSG00000174444,ENSG00000177600,ENSG00000110700,ENSG00000105193,ENSG00000105372,ENSG00000008988,ENSG00000171858,ENSG00000186468,ENSG00000166913
Schwann	Regulon10	VEZF1	0.167544	1	ABLIM1,ACTB,ACTG1,ALDOA,ANP32B,ANXA2,APLP2,ARF1,ARPC2,ARPC5L,ATF4,ATP1A1,ATP1B3,ATP6V1G1,BTF3,BTG1,C1orf43,CAST,CCDC47,CCNI,CCT2,CCT6A,CD81,CDKN1A,CFL1,CLTA,CNBP,COX4I1,CST3,DDX21,DDX3X,DDX5,DSTN,DYNLL1,EEF1A1,EIF3A,EIF3D,EIF3H,EIF4A1,EIF4B,EIF4G1,EIF4G2,EIF5,EIF5B,EMP1,ENO1,FAU,FUS,G3BP1,GDI2,GNG12,GUK1,HADHA,HDLBP,HINT1,HNRNPA2B1,HNRNPC,HNRNPK,HNRNPM,HNRNPU,HSPA8,HSPB1,IFI16,IFITM3,ILF2,IQGAP1,…	ENSG00000099204,ENSG00000075624,ENSG00000184009,ENSG00000149925,ENSG00000136938,ENSG00000182718,ENSG00000084234,ENSG00000143761,ENSG00000163466,ENSG00000136950,ENSG00000128272,ENSG00000163399,ENSG00000069849,ENSG00000136888,ENSG00000145741,ENSG00000133639,ENSG00000143612,ENSG00000153113,ENSG00000108588,ENSG00000118816,ENSG00000166226,ENSG00000146731,ENSG00000110651,ENSG00000124762,ENSG00000172757…
Schwann	Regulon11	PITX2	0.167531	1	ABLIM1,CCT2,CCT6A,CNBP,COX4I1,COX7C,CSDE1,DDX21,EIF3A,EIF3L,EIF4B,EIF4G1,EIF5,FAU,FUS,GDI2,GUK1,HNRNPC,HNRNPM,HSPB1,IFITM3,ILF2,ITM2B,KPNB1,METAP2,MRFAP1,MYL12B,NDUFS5,NDUFV1,PCBP2,PDIA6,PDLIM1,PEBP1,PFDN5,PKM,PSMB4,PSMD2,RAB11A,RAB7A,RAC1,RAN,RBM3,RPL11,RPL12,RPL13,RPL13A,RPL14,RPL18,RPL19,RPL23,RPL24,RPL27A,RPL30,RPL32,RPL35,RPL35A,RPL36,RPL37,RPL6,RPLP0,RPS12,RPS13,RPS14,RPS15,RPS15A,RPS23,RPS…	ENSG00000099204,ENSG00000166226,ENSG00000146731,ENSG00000169714,ENSG00000131143,ENSG00000127184,ENSG00000009307,ENSG00000165732,ENSG00000107581,ENSG00000100129,ENSG00000063046,ENSG00000114867,ENSG00000100664,ENSG00000149806,ENSG00000089280,ENSG00000057608,ENSG00000143774,ENSG00000092199,ENSG00000099783,ENSG00000106211,ENSG00000142089,ENSG00000143621,ENSG00000136156,ENSG00000108424,ENSG00000111142…
Schwann	Regulon12	MAZ	0.16753	1	ABLIM1,ACTB,ACTG1,ALDH2,ALDOA,ANXA2,APLP2,AQP3,ARF1,ARPC2,ARPC5L,ATF4,ATP1B3,BPTF,BTF3,BTG1,CALM2,CALML3,CAP1,CAST,CCNI,CCT3,CD44,CD82,CFL1,CNBP,COX4I1,COX5B,COX6C,CRABP2,CSDE1,CSNK1A1,CSTB,CYC1,DBI,DDX21,DDX5,DHCR24,DMKN,DSC3,DSG3,DSP,DSTN,DYNLL1,EDF1,EEF1A1,EI24,EIF3A,EIF3H,EIF4G2,EIF5,EIF5B,EIF6,EMP2,ENO1,ENSA,ETF1,EZR,FAU,FGFBP1,FUS,FXYD3,GDI2,GJA1,GLTP,GOLGA4,GRN,GSTP1,GUK1,HADHA,HDGF,HDLBP,…	ENSG00000099204,ENSG00000075624,ENSG00000184009,ENSG00000111275,ENSG00000149925,ENSG00000182718,ENSG00000084234,ENSG00000165272,ENSG00000143761,ENSG00000163466,ENSG00000136950,ENSG00000128272,ENSG00000069849,ENSG00000171634,ENSG00000145741,ENSG00000133639,ENSG00000143933,ENSG00000178363,ENSG00000131236,ENSG00000153113,ENSG00000118816,ENSG00000163468,ENSG00000026508,ENSG00000085117,ENSG00000172757…
Schwann	Regulon13	SP1	0.167529	1	ABLIM1,ACTB,ACTG1,AHNAK,AKR1B10,ALDH2,ALDOA,ANP32B,ANXA2,APRT,AQP3,ARF1,ARPC2,ARPC5L,ATP1B3,ATP6V1G1,BRK1,BTF3,BTG1,C19orf33,C1orf43,CALM2,CALML3,CALR,CAP1,CAPG,CCNI,CCT2,CCT3,CD44,CDKN1A,CFL1,CHCHD2,CLTA,CLTB,CNBP,COX4I1,COX5B,COX6B1,COX6C,COX8A,CSNK1A1,CTNNA1,CYC1,DBI,DDX1,DDX3X,DDX5,DHCR24,DMKN,DNTTIP2,DSC2,DSC3,DSG1,DSG3,DSP,DYNLL1,EEF1A1,EHF,EIF1,EIF3A,EIF3B,EIF3H,EIF3J,EIF4G1,EIF4G2,EIF5,EI…	ENSG00000099204,ENSG00000075624,ENSG00000184009,ENSG00000124942,ENSG00000198074,ENSG00000111275,ENSG00000149925,ENSG00000136938,ENSG00000182718,ENSG00000198931,ENSG00000165272,ENSG00000143761,ENSG00000163466,ENSG00000136950,ENSG00000069849,ENSG00000136888,ENSG00000254999,ENSG00000145741,ENSG00000133639,ENSG00000167644,ENSG00000143612,ENSG00000143933,ENSG00000178363,ENSG00000179218,ENSG00000131236…
Schwann	Regulon14	SP3	0.167528	1	ACTB,ACTG1,ALDH2,ALDOA,ANXA2,APLP2,APP,AQP3,ARPC2,ATP1A1,ATP2A2,ATP6V1G1,BMPR2,BTF3,CAP1,CCNI,CCT3,CD44,CD74,CD93,CDKN1A,CFL1,CLIC4,CNBP,COL15A1,COL4A1,COX4I1,COX5B,COX6B1,CRABP2,CSDE1,CSNK1A1,CSTB,CYC1,DDX17,DDX21,DDX5,DMKN,DSC3,DSG3,DSP,DSTN,DYNLL1,ECE1,EDF1,EEF1A1,EEF2,EHF,EIF1,EIF3A,EIF4G1,EIF4G2,EIF5,EIF5B,EMP1,EMP2,ENO1,ENSA,ETS1,EZR,FAU,FGFBP1,FLT1,FSTL1,FXYD3,GAPDH,GJB2,GLO1,GLTP,GOLGA4,G…	ENSG00000075624,ENSG00000184009,ENSG00000111275,ENSG00000149925,ENSG00000182718,ENSG00000084234,ENSG00000142192,ENSG00000165272,ENSG00000163466,ENSG00000163399,ENSG00000174437,ENSG00000136888,ENSG00000204217,ENSG00000145741,ENSG00000131236,ENSG00000118816,ENSG00000163468,ENSG00000026508,ENSG00000019582,ENSG00000125810,ENSG00000124762,ENSG00000172757,ENSG00000169504,ENSG00000169714,ENSG00000204291…
Schwann	Regulon15	RXRA	0.167502	1	ACTB,ACTG1,AHNAK,ALDH2,ALDOA,APLP2,AQP3,ARPC2,ATF4,ATP1A1,ATP2A2,ATP6V1G1,BTF3,CAP1,CAST,CCNI,CCT3,CD44,CDKN1A,CFL1,CNBP,COX4I1,COX5B,COX6B1,COX7C,CRABP2,CSDE1,CSNK1A1,CSTB,CYC1,DDX17,DDX21,DMKN,DSC3,DSP,DSTN,DYNLL1,EDF1,EEF1A1,EHF,EIF1,EIF3A,EIF4G1,EIF4G2,EIF5,EIF5B,EMP1,EMP2,ENO1,ENSA,EZR,FAU,FGFBP1,FXYD3,GJA1,GJB2,GLO1,GLTP,GOLGA4,GSTP1,GUK1,HDGF,HINT1,HNRNPAB,HNRNPK,HNRNPU,HSPA8,HSPB1,IFI16,I…	ENSG00000075624,ENSG00000184009,ENSG00000124942,ENSG00000111275,ENSG00000149925,ENSG00000084234,ENSG00000165272,ENSG00000163466,ENSG00000128272,ENSG00000163399,ENSG00000174437,ENSG00000136888,ENSG00000145741,ENSG00000131236,ENSG00000153113,ENSG00000118816,ENSG00000163468,ENSG00000026508,ENSG00000124762,ENSG00000172757,ENSG00000169714,ENSG00000131143,ENSG00000135940,ENSG00000126267,ENSG00000127184…
Schwann	Regulon16	RARA	0.167473	1	EIF1,FAU,RPL19,RPL27,RPL34,RPL35A,RPL37A,RPL4,RPLP0,RPLP2,RPS11,RPS12,RPS19,RPS23,RPS24,RPS3,RPS6,RPS8,UBA52,UBB,YWHAB	ENSG00000173812,ENSG00000149806,ENSG00000108298,ENSG00000131469,ENSG00000109475,ENSG00000182899,ENSG00000197756,ENSG00000174444,ENSG00000089157,ENSG00000177600,ENSG00000142534,ENSG00000112306,ENSG00000105372,ENSG00000186468,ENSG00000138326,ENSG00000149273,ENSG00000137154,ENSG00000142937,ENSG00000221983,ENSG00000170315,ENSG00000166913
Sebocyte	Regulon1	PITX2	0.184301	1	FAU,RPL13,RPL13A,RPL18,RPL19,RPL23,RPL27,RPL35,RPL35A,RPLP0,RPS11,RPS12,RPS23,RPS24,RPS3,RPS6,RPS8,UBA52,UBB	ENSG00000149806,ENSG00000167526,ENSG00000142541,ENSG00000063177,ENSG00000108298,ENSG00000125691,ENSG00000131469,ENSG00000136942,ENSG00000182899,ENSG00000089157,ENSG00000142534,ENSG00000112306,ENSG00000186468,ENSG00000138326,ENSG00000149273,ENSG00000137154,ENSG00000142937,ENSG00000221983,ENSG00000170315
Sebocyte	Regulon2	VEZF1	0.183703	1	MYL6,ACTG1,CALM1,EEF2,EIF1,EIF4G2,FAU,GAPDH,NACA,NCL,OAZ1,PTMA,RPL11,RPL12,RPL13,RPL13A,RPL15,RPL18,RPL19,RPL23,RPL27,RPL27A,RPL3,RPL30,RPL31,RPL32,RPL34,RPL35,RPL35A,RPL37A,RPL5,RPL8,RPLP0,RPLP1,RPLP2,RPS11,RPS12,RPS13,RPS14,RPS16,RPS19,RPS20,RPS21,RPS23,RPS24,RPS3,RPS5,RPS8,UBA52,UBB,YWHAB	ENSG00000092841,ENSG00000184009,ENSG00000198668,ENSG00000167658,ENSG00000173812,ENSG00000110321,ENSG00000149806,ENSG00000111640,ENSG00000196531,ENSG00000115053,ENSG00000104904,ENSG00000187514,ENSG00000142676,ENSG00000197958,ENSG00000167526,ENSG00000142541,ENSG00000174748,ENSG00000063177,ENSG00000108298,ENSG00000125691,ENSG00000131469,ENSG00000166441,ENSG00000100316,ENSG00000156482,ENSG00000071082…
Sebocyte	Regulon3	ZN770	0.183532	1	ACTG1,AHNAK,EIF4G2,FAU,JUN,NCL,RPL12,RPL13,RPL13A,RPL18,RPL19,RPL23,RPL27,RPL27A,RPL30,RPL32,RPL35,RPL5,RPLP0,RPLP1,RPLP2,RPS11,RPS12,RPS13,RPS14,RPS20,RPS21,RPS23,RPS24,RPS5,RPS6,RPS8,UBA52,UBB	ENSG00000184009,ENSG00000124942,ENSG00000110321,ENSG00000149806,ENSG00000177606,ENSG00000115053,ENSG00000197958,ENSG00000167526,ENSG00000142541,ENSG00000063177,ENSG00000108298,ENSG00000125691,ENSG00000131469,ENSG00000166441,ENSG00000156482,ENSG00000144713,ENSG00000136942,ENSG00000122406,ENSG00000089157,ENSG00000137818,ENSG00000177600,ENSG00000142534,ENSG00000112306,ENSG00000110700,ENSG00000164587…
Sebocyte	Regulon4	SP1	0.183201	1	ACTG1,AHNAK,EIF1,EIF4G2,FAU,JUN,NACA,NCL,OAZ1,RPL12,RPL13,RPL13A,RPL15,RPL18,RPL19,RPL23,RPL27A,RPL3,RPL30,RPL31,RPL35,RPL35A,RPL37A,RPL4,RPL5,RPLP0,RPLP1,RPLP2,RPS11,RPS12,RPS13,RPS14,RPS16,RPS19,RPS20,RPS21,RPS23,RPS24,RPS5,RPS6,RPS8,UBA52,UBB,YWHAB	ENSG00000184009,ENSG00000124942,ENSG00000173812,ENSG00000110321,ENSG00000149806,ENSG00000177606,ENSG00000196531,ENSG00000115053,ENSG00000104904,ENSG00000197958,ENSG00000167526,ENSG00000142541,ENSG00000174748,ENSG00000063177,ENSG00000108298,ENSG00000125691,ENSG00000166441,ENSG00000100316,ENSG00000156482,ENSG00000071082,ENSG00000136942,ENSG00000182899,ENSG00000197756,ENSG00000174444,ENSG00000122406…
T cell	Regulon1	PITX2	0.377608	0.202	DNAJA1,HSPA8,HSPD1,HSPH1,NOP58	ENSG00000086061,ENSG00000109971,ENSG00000144381,ENSG00000120694,ENSG00000055044
T cell	Regulon2	ZN281	0.363651	0.374	EIF1,GAPDH,NCL,RPL11,RPL35,RPS11,RPS13,RPS14,RPS23,RPS8,UBA52,UBB	ENSG00000173812,ENSG00000111640,ENSG00000115053,ENSG00000142676,ENSG00000136942,ENSG00000142534,ENSG00000110700,ENSG00000164587,ENSG00000186468,ENSG00000142937,ENSG00000221983,ENSG00000170315
VSMC	Regulon1	CPEB1	0.322221	0	EPAS1,MYH9,SPARCL1,TCF4,UTRN	ENSG00000116016,ENSG00000100345,ENSG00000152583,ENSG00000196628,ENSG00000152818
VSMC	Regulon2	SP2	0.311599	0.014	CD63,CRTAP,EPAS1,IGFBP7,MYH9,SPARC,SPTBN1,TCF4	ENSG00000135404,ENSG00000170275,ENSG00000116016,ENSG00000163453,ENSG00000100345,ENSG00000113140,ENSG00000115306,ENSG00000196628
VSMC	Regulon3	ZN263	0.276697	0.182	CD63,CD81,CRTAP,FSTL1,IFITM3,IL6ST,S100A6,SPARC,TCF4	ENSG00000135404,ENSG00000110651,ENSG00000170275,ENSG00000163430,ENSG00000142089,ENSG00000134352,ENSG00000197956,ENSG00000113140,ENSG00000196628
VSMC	Regulon4	ZN467	0.275551	0.21	IFITM3,RHOC,S100A6,SPARC,SPTBN1,TCF4	ENSG00000142089,ENSG00000155366,ENSG00000197956,ENSG00000113140,ENSG00000115306,ENSG00000196628
VSMC	Regulon5	PRDM6	0.272716	0.259	APP,CD63,CD81,GLG1,IFITM3,S100A6,SPARC,SPTBN1,TCF4	ENSG00000142192,ENSG00000135404,ENSG00000110651,ENSG00000090863,ENSG00000142089,ENSG00000197956,ENSG00000113140,ENSG00000115306,ENSG00000196628
VSMC	Regulon6	MAZ	0.21995	1	ANXA2,BTG1,DDX5,EIF1,EIF4G2,FAU,HNRNPA2B1,HSPA5,JUN,KLF6,NACA,NCL,NFKBIA,OAZ1,PPP1R15A,PTMA,RPL12,RPL13A,RPL15,RPL18,RPL23,RPL27,RPL27A,RPL3,RPL30,RPL31,RPL32,RPL34,RPL35,RPL35A,RPL37A,RPL4,RPL5,RPLP0,RPS13,RPS20,RPS23,RPS24,RPS5,UBA52,UBB,UBC	ENSG00000182718,ENSG00000133639,ENSG00000108654,ENSG00000173812,ENSG00000110321,ENSG00000149806,ENSG00000122566,ENSG00000044574,ENSG00000177606,ENSG00000067082,ENSG00000196531,ENSG00000115053,ENSG00000100906,ENSG00000104904,ENSG00000087074,ENSG00000187514,ENSG00000197958,ENSG00000142541,ENSG00000174748,ENSG00000063177,ENSG00000125691,ENSG00000131469,ENSG00000166441,ENSG00000100316,ENSG00000156482…
VSMC	Regulon7	SP1	0.21967	1	ANXA2,BTG1,DDX5,EIF1,EIF4G2,HNRNPA2B1,JUN,KLF6,NCL,NFKBIA,OAZ1,PPP1R15A,PTMA,RPL12,RPL13A,RPL18,RPL23,RPL27A,RPL3,RPL30,RPL31,RPL35,RPL35A,RPL37A,RPL4,RPLP0,RPS13,RPS20,RPS23,RPS24,UBA52,UBB,UBC	ENSG00000182718,ENSG00000133639,ENSG00000108654,ENSG00000173812,ENSG00000110321,ENSG00000122566,ENSG00000177606,ENSG00000067082,ENSG00000115053,ENSG00000100906,ENSG00000104904,ENSG00000087074,ENSG00000187514,ENSG00000197958,ENSG00000142541,ENSG00000063177,ENSG00000125691,ENSG00000166441,ENSG00000100316,ENSG00000156482,ENSG00000071082,ENSG00000136942,ENSG00000182899,ENSG00000197756,ENSG00000174444…
