# Supplementary material for: Generating detailed intercellular communication patterns in psoriasis at the single-cell level using social networking, pattern recognition, and manifold learning methods to optimize treatment strategies
Source: Aging (Albany NY). 2024 Jan 29;16(3):2194–231. doi: 10.18632/aging.205478 (PMC10911347; doi:10.18632/aging.205478)
Supplement: Supplementary Table 5 [file aging-16-205478-s006.xlsx]

## Sheet: Supplementary Table 5
Supplementary Table 5. Proteins detected in pathological sections of psoriasis and normal skin and their protein profile.
Protein accession	Protein description	Gene name	Coverage [%]	Peptides	PSMs	Unique Peptides	Razor + unique peptides	MW [kDa]	Intensity Normal skin 1	Intensity Normal skin 2	Intensity Normal skin 3	Intensity Normal skin 4	Intensity Normal skin 5	Intensity Normal skin 6	Intensity Psoriasis 1	Intensity Psoriasis 2	Intensity Psoriasis 3	Intensity Psoriasis 4	Intensity Psoriasis 5	Intensity Psoriasis 6	Intensity Psoriasis 7	Intensity Psoriasis 8	Intensity Psoriasis 9	Normal skin 1	Normal skin 2	Normal skin 3	Normal skin 4	Normal skin 5	Normal skin 6	Psoriasis 1	Psoriasis 2	Psoriasis 3	Psoriasis 4	Psoriasis 5	Psoriasis 6	Psoriasis 7	Psoriasis 8	Psoriasis 9	Psoriasis/Normal skin Ratio	Psoriasis/Normal P value	Subcellular localization	KEGG KO No.	KEGG Gene	KEGG pathway	Biological Process	Cellular Component	Molecular Function	Pfam ID	Domain description
P38606	V-type proton ATPase catalytic subunit A OS=Homo sapiens OX=9606 GN=ATP6V1A PE=1 SV=2	ATP6V1A	28	17	252	17	17	68.3	9.78491e+07	2.26352e+07	7.66314e+06	4.23254e+07	6.39966e+07	4.61424e+07	5.59866e+07	4.88846e+07	3.03644e+07	9.35388e+07	5.15679e+07	9.77585e+07	9.10699e+07	7.61749e+07	5.22249e+07	1.423	1.018	0.484	1.119	1.1	1.012	1.202	0.934	0.947	1.481	1.077	1.068	0.951	1.155	1.141	1.078	0.412116	cytoplasm	K02145	ATPeV1A; V-type H+-transporting ATPase subunit A [EC:7.1.2.2]	hsa05120 Epithelial cell signaling in Helicobacter pylori infection; hsa04721 Synaptic vesicle cycle; hsa04150 mTOR signaling pathway; hsa00190 Oxidative phosphorylation; hsa04966 Collecting duct acid secretion; hsa05110 Vibrio cholerae infection; hsa05165 Human papillomavirus infection; hsa04145 Phagosome; hsa05323 Rheumatoid arthritis; hsa01100 Metabolic pathways	GO:0000041 transition metal ion transport; GO:0006810 transport; GO:0006811 ion transport; GO:0006812 cation transport; GO:0006826 iron ion transport; GO:0006873 cellular ion homeostasis; GO:0006875 cellular metal ion homeostasis; GO:0006879 cellular iron ion homeostasis; GO:0007154 cell communication; GO:0007165 signal transduction; GO:0007166 cell surface receptor signaling pathway; GO:0007167 …	GO:0000323 lytic vacuole; GO:0005622 intracellular; GO:0005623 cell; GO:0005737 cytoplasm; GO:0005764 lysosome; GO:0005765 lysosomal membrane; GO:0005773 vacuole; GO:0005774 vacuolar membrane; GO:0005829 cytosol; GO:0005886 plasma membrane; GO:0005902 microvillus; GO:0016020 membrane; GO:0016324 apical plasma membrane; GO:0016469 proton-transporting two-sector ATPase complex; GO:0031090 organelle…	GO:0003824 catalytic activity; GO:0005215 transporter activity; GO:0008324 cation transmembrane transporter activity; GO:0015075 ion transmembrane transporter activity; GO:0015077 monovalent inorganic cation transmembrane transporter activity; GO:0015078 proton transmembrane transporter activity; GO:0015318 inorganic molecular entity transmembrane transporter activity; GO:0015399 primary active t…	PF02874; PF00006	ATP synthase alpha/beta family, beta-barrel domain; ATP synthase alpha/beta family, nucleotide-binding domain
Q9BZH6	WD repeat-containing protein 11 OS=Homo sapiens OX=9606 GN=WDR11 PE=1 SV=1	WDR11	4	3	11	3	3	136.6	1.3184e+06		1.46611e+06	1.10305e+06	2059318		1.03387e+06	2597415		749013	813639	4.6793e+06	2.92389e+06	4.01864e+06	2.76998e+06	0.528		2.547	0.802	0.974		0.611	1.366		0.326	0.467	1.407	0.84	1.677	1.665	0.862	0.763677	nucleus	K24260				GO:0005622 intracellular; GO:0005623 cell; GO:0005737 cytoplasm; GO:0005829 cytosol; GO:0005856 cytoskeleton; GO:0005929 cilium; GO:0015630 microtubule cytoskeleton; GO:0042995 cell projection; GO:0043226 organelle; GO:0043228 non-membrane-bounded organelle; GO:0043229 intracellular organelle; GO:0043232 intracellular non-membrane-bounded organelle; GO:0120025 plasma membrane bounded cell project…
Q7Z3T8	Zinc finger FYVE domain-containing protein 16 OS=Homo sapiens OX=9606 GN=ZFYVE16 PE=1 SV=3	ZFYVE16	1	1	1	1	1	168.8	2.05216e+06		581130	686622	1.02907e+06	808990				1.19253e+06		989800	903447	534208	422334																		nucleus	K04679	MADHIP; MAD, mothers against decapentaplegic interacting protein	hsa04350 TGF-beta signaling pathway; hsa04144 Endocytosis	GO:0006355 regulation of transcription, DNA-templated; GO:0006357 regulation of transcription by RNA polymerase II; GO:0006605 protein targeting; GO:0006622 protein targeting to lysosome; GO:0006623 protein targeting to vacuole; GO:0006810 transport; GO:0006886 intracellular protein transport; GO:0006996 organelle organization; GO:0007034 vacuolar transport; GO:0007041 lysosomal transport; GO:000…	GO:0005622 intracellular; GO:0005623 cell; GO:0005737 cytoplasm; GO:0005768 endosome; GO:0005769 early endosome; GO:0005829 cytosol; GO:0010008 endosome membrane; GO:0012505 endomembrane system; GO:0016020 membrane; GO:0031090 organelle membrane; GO:0031410 cytoplasmic vesicle; GO:0031901 early endosome membrane; GO:0031982 vesicle; GO:0043226 organelle; GO:0043227 membrane-bounded organelle; GO:…	GO:0005215 transporter activity; GO:0005488 binding; GO:0005543 phospholipid binding; GO:0005545 1-phosphatidylinositol binding; GO:0005547 phosphatidylinositol-3,4,5-trisphosphate binding; GO:0008289 lipid binding; GO:0035091 phosphatidylinositol binding; GO:0043167 ion binding; GO:0043168 anion binding; GO:1901981 phosphatidylinositol phosphate binding;	PF01363	FYVE zinc finger
Q9C0B5	Palmitoyltransferase ZDHHC5 OS=Homo sapiens OX=9606 GN=ZDHHC5 PE=1 SV=2	ZDHHC5	2	1	2	1	1	77.5	1.27527e+06				620949	990758								1.05069e+06																			plasma membrane	K20030			GO:0006464 cellular protein modification process; GO:0006497 protein lipidation; GO:0006807 nitrogen compound metabolic process; GO:0008152 metabolic process; GO:0009058 biosynthetic process; GO:0009059 macromolecule biosynthetic process; GO:0009987 cellular process; GO:0018345 protein palmitoylation; GO:0019538 protein metabolic process; GO:0034645 cellular macromolecule biosynthetic process; GO…	GO:0005622 intracellular; GO:0005623 cell; GO:0005737 cytoplasm; GO:0005886 plasma membrane; GO:0016020 membrane; GO:0030425 dendrite; GO:0036477 somatodendritic compartment; GO:0042995 cell projection; GO:0043005 neuron projection; GO:0071944 cell periphery; GO:0097447 dendritic tree; GO:0120025 plasma membrane bounded cell projection;	GO:0003824 catalytic activity; GO:0016409 palmitoyltransferase activity; GO:0016740 transferase activity; GO:0016746 transferase activity, transferring acyl groups; GO:0016747 transferase activity, transferring acyl groups other than amino-acyl groups;
Q99536	Synaptic vesicle membrane protein VAT-1 homolog OS=Homo sapiens OX=9606 GN=VAT1 PE=1 SV=2	VAT1	33	10	204	10	10	41.9	5.71175e+07	2.20008e+07	5.6974e+06	3.49879e+07	4.5446e+07	39508418	3.04846e+07	3.1749e+07	1.87558e+07	4.40511e+07	4.56093e+07	3.9098e+07	4.36003e+07	3.7926e+07	3.65442e+07	1.37	1.632	0.593	1.525	1.288	1.428	1.079	1	0.964	1.15	1.57	0.704	0.751	0.948	1.316	0.807	0.245079	cytoplasm	K23167			GO:0001775 cell activation; GO:0002252 immune effector process; GO:0002263 cell activation involved in immune response; GO:0002274 myeloid leukocyte activation; GO:0002275 myeloid cell activation involved in immune response; GO:0002283 neutrophil activation involved in immune response; GO:0002366 leukocyte activation involved in immune response; GO:0002376 immune system process; GO:0002443 leukoc…	GO:0000323 lytic vacuole; GO:0005576 extracellular region; GO:0005622 intracellular; GO:0005623 cell; GO:0005737 cytoplasm; GO:0005739 mitochondrion; GO:0005740 mitochondrial envelope; GO:0005741 mitochondrial outer membrane; GO:0005764 lysosome; GO:0005766 primary lysosome; GO:0005773 vacuole; GO:0005775 vacuolar lumen; GO:0012505 endomembrane system; GO:0016020 membrane; GO:0016021 integral com…		PF08240; PF13602	Alcohol dehydrogenase GroES-like domain; Zinc-binding dehydrogenase
Q5BKZ1	DBIRD complex subunit ZNF326 OS=Homo sapiens OX=9606 GN=ZNF326 PE=1 SV=2	ZNF326	11	6	20	6	6	65.6	1.84255e+06			338767	1.51003e+06		1.48026e+06	449611	278240	150539	1.39347e+06	1.84754e+06	4.44875e+06	5.39479e+06	1.26817e+06	0.923			0.308	0.894		1.094	0.296	0.299	0.082	1.002	0.695	1.6	2.817	0.954	1.387	0.951657	nucleus	K13204			GO:0006139 nucleobase-containing compound metabolic process; GO:0006355 regulation of transcription, DNA-templated; GO:0006396 RNA processing; GO:0006725 cellular aromatic compound metabolic process; GO:0006807 nitrogen compound metabolic process; GO:0008152 metabolic process; GO:0008380 RNA splicing; GO:0009889 regulation of biosynthetic process; GO:0009987 cellular process; GO:0010467 gene expr…	GO:0005622 intracellular; GO:0005623 cell; GO:0005634 nucleus; GO:0005654 nucleoplasm; GO:0016363 nuclear matrix; GO:0031974 membrane-enclosed lumen; GO:0031981 nuclear lumen; GO:0032991 protein-containing complex; GO:0034399 nuclear periphery; GO:0043226 organelle; GO:0043227 membrane-bounded organelle; GO:0043229 intracellular organelle; GO:0043231 intracellular membrane-bounded organelle; GO:0…	GO:0000993 RNA polymerase II complex binding; GO:0001098 basal transcription machinery binding; GO:0001099 basal RNA polymerase II transcription machinery binding; GO:0005488 binding; GO:0005515 protein binding; GO:0019899 enzyme binding; GO:0043175 RNA polymerase core enzyme binding; GO:0044877 protein-containing complex binding; GO:0070063 RNA polymerase binding;
O15156	Zinc finger and BTB domain-containing protein 7B OS=Homo sapiens OX=9606 GN=ZBTB7B PE=1 SV=2	ZBTB7B	8	3	6	3	3	58	864423			500226	1.21837e+06	832903		824678		416666		1.69366e+06	1.74479e+06	1.17923e+06	924365	0.722			0.759	1.202	1.048		0.905		0.379		1.062	1.046	1.026	1.159	0.997	0.871259	nucleus	K10494			GO:0000122 negative regulation of transcription by RNA polymerase II; GO:0001775 cell activation; GO:0001816 cytokine production; GO:0001865 NK T cell differentiation; GO:0002376 immune system process; GO:0002520 immune system development; GO:0002521 leukocyte differentiation; GO:0002682 regulation of immune system process; GO:0002683 negative regulation of immune system process; GO:0002684 posit…	GO:0005622 intracellular; GO:0005623 cell; GO:0005634 nucleus; GO:0005654 nucleoplasm; GO:0031974 membrane-enclosed lumen; GO:0031981 nuclear lumen; GO:0043226 organelle; GO:0043227 membrane-bounded organelle; GO:0043229 intracellular organelle; GO:0043231 intracellular membrane-bounded organelle; GO:0043233 organelle lumen; GO:0070013 intracellular organelle lumen;	GO:0000976 transcription regulatory region sequence-specific DNA binding; GO:0000977 RNA polymerase II transcription regulatory region sequence-specific DNA binding; GO:0000978 RNA polymerase II cis-regulatory region sequence-specific DNA binding; GO:0000981 DNA-binding transcription factor activity, RNA polymerase II-specific; GO:0000987 cis-regulatory region sequence-specific DNA binding; GO:00…	PF00651; PF00096	BTB/POZ domain; Zinc finger, C2H2 type
Q6UXN9	WD repeat-containing protein 82 OS=Homo sapiens OX=9606 GN=WDR82 PE=1 SV=1	WDR82	15	5	28	5	5	35.1	2357918	340543	52552.5	1.72643e+06	1.59007e+06	973147	2.64012e+06	1.6046e+06	1.85156e+06	3.5066e+06	1.35074e+06	5.20401e+06	4.58279e+06	5.60709e+06	3.32378e+06	0.82	0.366	0.079	1.091	0.654	0.51	1.356	0.733	1.381	1.328	0.675	1.36	1.145	2.034	1.736	2.225	0.011188	cytoplasm	K14962	WDR82; COMPASS component SWD2	hsa03015 mRNA surveillance pathway	GO:0006325 chromatin organization; GO:0006464 cellular protein modification process; GO:0006479 protein methylation; GO:0006807 nitrogen compound metabolic process; GO:0006996 organelle organization; GO:0008152 metabolic process; GO:0008213 protein alkylation; GO:0009987 cellular process; GO:0016043 cellular component organization; GO:0016569 covalent chromatin modification; GO:0016570 histone mo…	GO:0000785 chromatin; GO:0005622 intracellular; GO:0005623 cell; GO:0005634 nucleus; GO:0005654 nucleoplasm; GO:0005694 chromosome; GO:0005730 nucleolus; GO:0008287 protein serine/threonine phosphatase complex; GO:0031974 membrane-enclosed lumen; GO:0031981 nuclear lumen; GO:0032991 protein-containing complex; GO:0034708 methyltransferase complex; GO:0035097 histone methyltransferase complex; GO:…	GO:0003682 chromatin binding; GO:0005488 binding;
Q6RFH5	WD repeat-containing protein 74 OS=Homo sapiens OX=9606 GN=WDR74 PE=1 SV=1	WDR74	3	1	1	1	1	42.4																																	cytoplasm,nucleus	K14841			GO:0001701 in utero embryonic development; GO:0001824 blastocyst development; GO:0001825 blastocyst formation; GO:0006139 nucleobase-containing compound metabolic process; GO:0006725 cellular aromatic compound metabolic process; GO:0006807 nitrogen compound metabolic process; GO:0007275 multicellular organism development; GO:0008152 metabolic process; GO:0009653 anatomical structure morphogenesis…	GO:0005622 intracellular; GO:0005623 cell; GO:0005634 nucleus; GO:0005730 nucleolus; GO:0030684 preribosome; GO:0030687 preribosome, large subunit precursor; GO:0031974 membrane-enclosed lumen; GO:0031981 nuclear lumen; GO:0032991 protein-containing complex; GO:0043226 organelle; GO:0043227 membrane-bounded organelle; GO:0043228 non-membrane-bounded organelle; GO:0043229 intracellular organelle; …
O14980	Exportin-1 OS=Homo sapiens OX=9606 GN=XPO1 PE=1 SV=1	XPO1	28	23	216	23	23	123.3	2.05402e+07	2.25396e+07	1.48413e+07	1.07167e+07	2.28754e+07	1.68231e+07	1.79376e+07	1.99196e+07	2.04689e+07	2.67613e+07	1.26903e+07	4.90985e+07	4.0851e+07	2.38262e+07	1.53773e+07	0.782	2.656	2.454	0.742	1.03	0.966	1.009	0.997	1.671	1.11	0.694	1.405	1.117	0.946	0.88	0.759	0.461372	cytoplasm	K14290	XPO1; exportin-1	hsa03008 Ribosome biogenesis in eukaryotes; hsa03013 Nucleocytoplasmic transport; hsa05164 Influenza A; hsa05166 Human T-cell leukemia virus 1 infection	GO:0000054 ribosomal subunit export from nucleus; GO:0000055 ribosomal large subunit export from nucleus; GO:0000056 ribosomal small subunit export from nucleus; GO:0006403 RNA localization; GO:0006405 RNA export from nucleus; GO:0006611 protein export from nucleus; GO:0006810 transport; GO:0006886 intracellular protein transport; GO:0006913 nucleocytoplasmic transport; GO:0008104 protein localiz…	GO:0000775 chromosome, centromeric region; GO:0000776 kinetochore; GO:0005622 intracellular; GO:0005623 cell; GO:0005634 nucleus; GO:0005635 nuclear envelope; GO:0005642 annulate lamellae; GO:0005654 nucleoplasm; GO:0005694 chromosome; GO:0005730 nucleolus; GO:0005737 cytoplasm; GO:0005829 cytosol; GO:0012505 endomembrane system; GO:0015030 Cajal body; GO:0016020 membrane; GO:0016604 nuclear body…	GO:0005049 nuclear export signal receptor activity; GO:0005215 transporter activity; GO:0140104 molecular carrier activity; GO:0140142 nucleocytoplasmic carrier activity;
Q07157	Tight junction protein ZO-1 OS=Homo sapiens OX=9606 GN=TJP1 PE=1 SV=3	TJP1	10	13	74	13	13	195.3	1.17249e+08	7.39333e+07	4.04308e+07	8.37544e+07	1.70265e+08	113898510	1.09151e+08	8.03582e+07	7.24346e+07	1.80265e+08	9.20128e+07	2.31404e+08	2.57103e+08	8.67739e+07	64186033	0.844	1.647	1.264	1.096	1.449	1.237	1.161	0.76	1.118	1.414	0.951	1.252	1.33	0.652	0.694	0.825	0.170605	nucleus	K05701	TJP1; tight junction protein 1	hsa05120 Epithelial cell signaling in Helicobacter pylori infection; hsa04520 Adherens junction; hsa05130 Pathogenic Escherichia coli infection; hsa04540 Gap junction; hsa05110 Vibrio cholerae infection; hsa04530 Tight junction	GO:0001701 in utero embryonic development; GO:0001824 blastocyst development; GO:0001825 blastocyst formation; GO:0001885 endothelial cell development; GO:0002064 epithelial cell development; GO:0003008 system process; GO:0003158 endothelium development; GO:0007043 cell-cell junction assembly; GO:0007154 cell communication; GO:0007165 signal transduction; GO:0007267 cell-cell signaling; GO:000727…	GO:0005622 intracellular; GO:0005623 cell; GO:0005634 nucleus; GO:0005737 cytoplasm; GO:0005829 cytosol; GO:0005886 plasma membrane; GO:0005911 cell-cell junction; GO:0005912 adherens junction; GO:0005923 bicellular tight junction; GO:0009986 cell surface; GO:0014704 intercalated disc; GO:0016020 membrane; GO:0016323 basolateral plasma membrane; GO:0016324 apical plasma membrane; GO:0016327 apico…	GO:0005488 binding; GO:0005515 protein binding; GO:0008022 protein C-terminus binding; GO:0019904 protein domain specific binding; GO:0071253 connexin binding;	PF00595; PF07653; PF00625	PDZ domain (Also known as DHR or GLGF); Variant SH3 domain; Guanylate kinase
Q96F44	E3 ubiquitin-protein ligase TRIM11 OS=Homo sapiens OX=9606 GN=TRIM11 PE=1 SV=2	TRIM11	2	1	1	1	1	52.7				486656	232233	164686							193679	409031	266368																		nucleus	K10650			GO:0002376 immune system process; GO:0006355 regulation of transcription, DNA-templated; GO:0006464 cellular protein modification process; GO:0006807 nitrogen compound metabolic process; GO:0006950 response to stress; GO:0006952 defense response; GO:0006955 immune response; GO:0007275 multicellular organism development; GO:0007399 nervous system development; GO:0008152 metabolic process; GO:00098…	GO:0005622 intracellular; GO:0005623 cell; GO:0005634 nucleus; GO:0005737 cytoplasm; GO:0005829 cytosol; GO:0043226 organelle; GO:0043227 membrane-bounded organelle; GO:0043229 intracellular organelle; GO:0043231 intracellular membrane-bounded organelle;	GO:0003824 catalytic activity; GO:0004842 ubiquitin-protein transferase activity; GO:0005488 binding; GO:0005515 protein binding; GO:0008134 transcription factor binding; GO:0016740 transferase activity; GO:0019787 ubiquitin-like protein transferase activity; GO:0019904 protein domain specific binding; GO:0061630 ubiquitin protein ligase activity; GO:0061659 ubiquitin-like protein ligase activity…	PF00643	B-box zinc finger
P67936	Tropomyosin alpha-4 chain OS=Homo sapiens OX=9606 GN=TPM4 PE=1 SV=3	TPM4	64	20	405	10	17	28.5	2.97664e+08	4.73551e+07	3.28111e+07	1.03795e+08	1.42402e+08	106729474	1.22554e+08	1.24529e+08	6.10547e+07	1.84946e+08	1.02902e+08	1.42864e+08	2.30783e+08	1.64014e+08	9.36523e+07	1.941	0.955	0.929	1.23	1.098	1.05	1.18	1.067	0.854	1.314	0.963	0.7	1.081	1.115	0.917	0.851	0.247414	cytoplasm	K10375	TPM4; tropomyosin 4	hsa04260 Cardiac muscle contraction; hsa05410 Hypertrophic cardiomyopathy; hsa05414 Dilated cardiomyopathy; hsa04261 Adrenergic signaling in cardiomyocytes	GO:0003008 system process; GO:0003012 muscle system process; GO:0006936 muscle contraction; GO:0006996 organelle organization; GO:0007010 cytoskeleton organization; GO:0007015 actin filament organization; GO:0009987 cellular process; GO:0016043 cellular component organization; GO:0030029 actin filament-based process; GO:0030036 actin cytoskeleton organization; GO:0032501 multicellular organismal …	GO:0001725 stress fiber; GO:0002102 podosome; GO:0005622 intracellular; GO:0005623 cell; GO:0005737 cytoplasm; GO:0005856 cytoskeleton; GO:0005862 muscle thin filament tropomyosin; GO:0005865 striated muscle thin filament; GO:0005884 actin filament; GO:0005938 cell cortex; GO:0015629 actin cytoskeleton; GO:0030016 myofibril; GO:0030017 sarcomere; GO:0030863 cortical cytoskeleton; GO:0032432 actin…	GO:0003779 actin binding; GO:0005198 structural molecule activity; GO:0005488 binding; GO:0005515 protein binding; GO:0008092 cytoskeletal protein binding; GO:0008307 structural constituent of muscle; GO:0042802 identical protein binding; GO:0042803 protein homodimerization activity; GO:0044877 protein-containing complex binding; GO:0046982 protein heterodimerization activity; GO:0046983 protein …
Q7L0Y3	tRNA methyltransferase 10 homolog C OS=Homo sapiens OX=9606 GN=TRMT10C PE=1 SV=2	TRMT10C	14	6	17	6	6	47.3	2.86756e+07	4.18707e+06	2.24112e+06	119723	626454	1.6898e+06	1.5982e+07	2.06423e+07	12185559	2.38416e+07	1.01012e+07	3.97672e+07	2.73146e+07	1.2204e+07	7.5874e+06	1.768	0.798	0.6	0.013	0.046	0.157	1.454	1.672	1.61	1.601	0.894	1.842	1.209	0.785	0.702	2.32	0.066567	mitochondria	K17654			GO:0000959 mitochondrial RNA metabolic process; GO:0000963 mitochondrial RNA processing; GO:0000964 mitochondrial RNA 5'-end processing; GO:0000965 mitochondrial RNA 3'-end processing; GO:0000966 RNA 5'-end processing; GO:0001510 RNA methylation; GO:0006139 nucleobase-containing compound metabolic process; GO:0006396 RNA processing; GO:0006399 tRNA metabolic process; GO:0006400 tRNA modification;…	GO:0005622 intracellular; GO:0005623 cell; GO:0005634 nucleus; GO:0005654 nucleoplasm; GO:0005737 cytoplasm; GO:0005739 mitochondrion; GO:0005759 mitochondrial matrix; GO:0030677 ribonuclease P complex; GO:0030678 mitochondrial ribonuclease P complex; GO:0031974 membrane-enclosed lumen; GO:0031981 nuclear lumen; GO:0032991 protein-containing complex; GO:0043226 organelle; GO:0043227 membrane-boun…	GO:0000049 tRNA binding; GO:0003676 nucleic acid binding; GO:0003723 RNA binding; GO:0003824 catalytic activity; GO:0005488 binding; GO:0008168 methyltransferase activity; GO:0008173 RNA methyltransferase activity; GO:0008174 mRNA methyltransferase activity; GO:0008175 tRNA methyltransferase activity; GO:0008757 S-adenosylmethionine-dependent methyltransferase activity; GO:0009019 tRNA (guanine-N…
Q9BRJ7	Tudor-interacting repair regulator protein OS=Homo sapiens OX=9606 GN=NUDT16L1 PE=1 SV=1	NUDT16L1	30	5	16	4	5	23.3	1.17394e+06	78260		644237	964583	827904	67121	839529	348411	397255	275785	2.2316e+06	2.0169e+06	1.17111e+06	528828	1.21	0.249		1.207	1.175	1.286	0.102	1.137	0.77	0.446	0.408	1.728	1.493	1.259	0.818	0.884	0.628394	cytoplasm	K16867	NUDT16L1; NUDT16-like protein 1	hsa05205 Proteoglycans in cancer	GO:0006282 regulation of DNA repair; GO:0009892 negative regulation of metabolic process; GO:0010605 negative regulation of macromolecule metabolic process; GO:0019219 regulation of nucleobase-containing compound metabolic process; GO:0019222 regulation of metabolic process; GO:0031323 regulation of cellular metabolic process; GO:0031324 negative regulation of cellular metabolic process; GO:00457…	GO:0005622 intracellular; GO:0005623 cell; GO:0005634 nucleus; GO:0043226 organelle; GO:0043227 membrane-bounded organelle; GO:0043229 intracellular organelle; GO:0043231 intracellular membrane-bounded organelle;	GO:0003676 nucleic acid binding; GO:0003723 RNA binding; GO:0005488 binding; GO:0030515 snoRNA binding; GO:0097159 organic cyclic compound binding; GO:1901363 heterocyclic compound binding;
Q9Y5S1	Transient receptor potential cation channel subfamily V member 2 OS=Homo sapiens OX=9606 GN=TRPV2 PE=1 SV=1	TRPV2	6	4	11	4	4	85.9	7.57242e+06	136237		3.217e+06	7783997	1.14361e+06	837710	3.73607e+06	190618	6.41328e+06	5.40004e+06	8.49082e+06	6.39838e+06	3.81435e+06	6.1784e+06	1.472	0.082		1.137	1.788	0.335	0.24	0.954	0.079	1.358	1.507	1.24	0.893	0.773	1.804	1.021	0.775819	plasma membrane	K04971	TRPV2; transient receptor potential cation channel subfamily V member 2	hsa04750 Inflammatory mediator regulation of TRP channels; hsa04621 NOD-like receptor signaling pathway	GO:0001558 regulation of cell growth; GO:0003008 system process; GO:0006810 transport; GO:0006811 ion transport; GO:0006812 cation transport; GO:0006816 calcium ion transport; GO:0006950 response to stress; GO:0007275 multicellular organism development; GO:0007399 nervous system development; GO:0007600 sensory perception; GO:0008285 negative regulation of cell population proliferation; GO:0008361…	GO:0005622 intracellular; GO:0005623 cell; GO:0005737 cytoplasm; GO:0005886 plasma membrane; GO:0005887 integral component of plasma membrane; GO:0009986 cell surface; GO:0012505 endomembrane system; GO:0016020 membrane; GO:0016021 integral component of membrane; GO:0030027 lamellipodium; GO:0030424 axon; GO:0030426 growth cone; GO:0030427 site of polarized growth; GO:0031224 intrinsic component …	GO:0005215 transporter activity; GO:0005216 ion channel activity; GO:0005261 cation channel activity; GO:0005262 calcium channel activity; GO:0005488 binding; GO:0005515 protein binding; GO:0008324 cation transmembrane transporter activity; GO:0015075 ion transmembrane transporter activity; GO:0015085 calcium ion transmembrane transporter activity; GO:0015267 channel activity; GO:0015318 inorgani…
Q8TD43	Transient receptor potential cation channel subfamily M member 4 OS=Homo sapiens OX=9606 GN=TRPM4 PE=1 SV=1	TRPM4	5	4	11	4	4	134.2	225393	109237	372044	70570.4	258560	81041.5	1.10638e+06	767485	717553	539887	223334	1.58885e+06	495566	517120		0.38	0.569	2.722	0.216	0.515	0.206	2.752	1.699	2.592	0.991	0.54	2.012	0.6	0.909		1.969	0.0414691	plasma membrane	K04979	TRPM4; transient receptor potential cation channel subfamily M member 4	hsa04911 Insulin secretion	GO:0001508 action potential; GO:0001817 regulation of cytokine production; GO:0002027 regulation of heart rate; GO:0002376 immune system process; GO:0002407 dendritic cell chemotaxis; GO:0002682 regulation of immune system process; GO:0002697 regulation of immune effector process; GO:0002700 regulation of production of molecular mediator of immune response; GO:0002703 regulation of leukocyte medi…	GO:0005622 intracellular; GO:0005623 cell; GO:0005634 nucleus; GO:0005654 nucleoplasm; GO:0005737 cytoplasm; GO:0005783 endoplasmic reticulum; GO:0005794 Golgi apparatus; GO:0005829 cytosol; GO:0005886 plasma membrane; GO:0005887 integral component of plasma membrane; GO:0012505 endomembrane system; GO:0016020 membrane; GO:0016021 integral component of membrane; GO:0031224 intrinsic component of …	GO:0000166 nucleotide binding; GO:0005215 transporter activity; GO:0005216 ion channel activity; GO:0005227 calcium activated cation channel activity; GO:0005244 voltage-gated ion channel activity; GO:0005261 cation channel activity; GO:0005262 calcium channel activity; GO:0005272 sodium channel activity; GO:0005488 binding; GO:0005509 calcium ion binding; GO:0005524 ATP binding; GO:0008144 drug …
Q16831	Uridine phosphorylase 1 OS=Homo sapiens OX=9606 GN=UPP1 PE=1 SV=1	UPP1	8	3	8	3	3	33.9		437686	136346	493844	321614		354246	916085	265860	465881	156714	387413	1.92433e+06	1.18627e+06	691595		1.937	0.847	1.284	0.544		0.748	1.722	0.815	0.726	0.322	0.416	1.976	1.769	1.486	0.962	0.787696	cytoplasm	K00757	udp; uridine phosphorylase [EC:2.4.2.3]	hsa00983 Drug metabolism - other enzymes; hsa00240 Pyrimidine metabolism; hsa01100 Metabolic pathways	GO:0006139 nucleobase-containing compound metabolic process; GO:0006213 pyrimidine nucleoside metabolic process; GO:0006218 uridine catabolic process; GO:0006220 pyrimidine nucleotide metabolic process; GO:0006725 cellular aromatic compound metabolic process; GO:0006753 nucleoside phosphate metabolic process; GO:0006793 phosphorus metabolic process; GO:0006796 phosphate-containing compound metabo…	GO:0005622 intracellular; GO:0005623 cell; GO:0005634 nucleus; GO:0005654 nucleoplasm; GO:0005737 cytoplasm; GO:0005829 cytosol; GO:0031974 membrane-enclosed lumen; GO:0031981 nuclear lumen; GO:0043226 organelle; GO:0043227 membrane-bounded organelle; GO:0043229 intracellular organelle; GO:0043231 intracellular membrane-bounded organelle; GO:0043233 organelle lumen; GO:0070013 intracellular organ…	GO:0003824 catalytic activity; GO:0004850 uridine phosphorylase activity; GO:0016740 transferase activity; GO:0016757 transferase activity, transferring glycosyl groups; GO:0016763 transferase activity, transferring pentosyl groups;	PF01048	Phosphorylase superfamily
Q9BZX2	Uridine-cytidine kinase 2 OS=Homo sapiens OX=9606 GN=UCK2 PE=1 SV=1	UCK2	3	1	5	1	1	29.3	378453	442422			173338		213911	254456			319482	626450	845959	127705																			cytoplasm	K00876	udk; uridine kinase [EC:2.7.1.48]	hsa00983 Drug metabolism - other enzymes; hsa00240 Pyrimidine metabolism; hsa01100 Metabolic pathways	GO:0006139 nucleobase-containing compound metabolic process; GO:0006206 pyrimidine nucleobase metabolic process; GO:0006213 pyrimidine nucleoside metabolic process; GO:0006220 pyrimidine nucleotide metabolic process; GO:0006221 pyrimidine nucleotide biosynthetic process; GO:0006222 UMP biosynthetic process; GO:0006464 cellular protein modification process; GO:0006508 proteolysis; GO:0006725 cellu…	GO:0005622 intracellular; GO:0005623 cell; GO:0005737 cytoplasm; GO:0005829 cytosol; GO:0043226 organelle; GO:0043227 membrane-bounded organelle; GO:0043229 intracellular organelle; GO:0043231 intracellular membrane-bounded organelle;	GO:0003824 catalytic activity; GO:0004849 uridine kinase activity; GO:0016301 kinase activity; GO:0016740 transferase activity; GO:0016772 transferase activity, transferring phosphorus-containing groups; GO:0019205 nucleobase-containing compound kinase activity; GO:0019206 nucleoside kinase activity;	PF00485	Phosphoribulokinase / Uridine kinase family
O95847	Mitochondrial uncoupling protein 4 OS=Homo sapiens OX=9606 GN=SLC25A27 PE=2 SV=1	SLC25A27	2	1	5	1	1	36	1.04601e+06				400652	374912	342837	920212	812942	1.0921e+06	746917	1.09602e+06	1.60097e+06	843306	454846																		cytoplasm	K15112			GO:0006810 transport; GO:0006839 mitochondrial transport; GO:0006950 response to stress; GO:0009266 response to temperature stimulus; GO:0009409 response to cold; GO:0009628 response to abiotic stimulus; GO:0042391 regulation of membrane potential; GO:0050896 response to stimulus; GO:0051179 localization; GO:0051234 establishment of localization; GO:0051881 regulation of mitochondrial membrane po…	GO:0005622 intracellular; GO:0005623 cell; GO:0005737 cytoplasm; GO:0005739 mitochondrion; GO:0005740 mitochondrial envelope; GO:0005743 mitochondrial inner membrane; GO:0016020 membrane; GO:0016021 integral component of membrane; GO:0019866 organelle inner membrane; GO:0031090 organelle membrane; GO:0031224 intrinsic component of membrane; GO:0031966 mitochondrial membrane; GO:0031967 organelle …	GO:0005215 transporter activity; GO:0022857 transmembrane transporter activity;
Q8N0U8	Vitamin K epoxide reductase complex subunit 1-like protein 1 OS=Homo sapiens OX=9606 GN=VKORC1L1 PE=1 SV=2	VKORC1L1	12	2	20	2	2	19.8	2.21048e+06	254734	85032	392977	1.4636e+06	2.21046e+06	1.37405e+06	695954	324583	1.27245e+06	1.16027e+06	777744	751022	2.69672e+06	523237	1.743	0.621	0.291	0.563	1.364	2.628	1.6	0.721	0.549	1.093	1.314	0.461	0.425	2.218	0.62	0.832	0.826952	plasma membrane	K05357	VKORC1; vitamin-K-epoxide reductase (warfarin-sensitive) [EC:1.17.4.4]	hsa00130 Ubiquinone and other terpenoid-quinone biosynthesis; hsa01240 Biosynthesis of cofactors; hsa01100 Metabolic pathways	GO:0006464 cellular protein modification process; GO:0006766 vitamin metabolic process; GO:0006775 fat-soluble vitamin metabolic process; GO:0006807 nitrogen compound metabolic process; GO:0006950 response to stress; GO:0006979 response to oxidative stress; GO:0008152 metabolic process; GO:0009987 cellular process; GO:0017187 peptidyl-glutamic acid carboxylation; GO:0018193 peptidyl-amino acid mo…	GO:0005622 intracellular; GO:0005623 cell; GO:0005737 cytoplasm; GO:0005783 endoplasmic reticulum; GO:0005789 endoplasmic reticulum membrane; GO:0012505 endomembrane system; GO:0016020 membrane; GO:0031984 organelle subcompartment; GO:0042175 nuclear outer membrane-endoplasmic reticulum membrane network; GO:0043226 organelle; GO:0043227 membrane-bounded organelle; GO:0043229 intracellular organel…	GO:0003824 catalytic activity; GO:0016491 oxidoreductase activity; GO:0016614 oxidoreductase activity, acting on CH-OH group of donors; GO:0016900 oxidoreductase activity, acting on the CH-OH group of donors, disulfide as acceptor; GO:0047057 vitamin-K-epoxide reductase (warfarin-sensitive) activity;	PF07884	Vitamin K epoxide reductase family
P55060	Exportin-2 OS=Homo sapiens OX=9606 GN=CSE1L PE=1 SV=3	CSE1L	27	25	236	25	25	110.3	9.87791e+08	4.47153e+08	3.25265e+08	6.79155e+08	1.03555e+09	1.1105e+09	6.08531e+08	7.08079e+08	4.44303e+08	9.26984e+08	8.40614e+08	1.1768e+09	1.28121e+09	8.1206e+08	6.15034e+08	1.051	1.472	1.503	1.314	1.303	1.782	0.956	0.99	1.014	1.074	1.284	0.941	0.979	0.901	0.983	0.722	0.000678443	cytoplasm,nucleus	K18423	CSE1; exportin-2 (importin alpha re-exporter)	hsa05132 Salmonella infection; hsa03013 Nucleocytoplasmic transport	GO:0006606 protein import into nucleus; GO:0006611 protein export from nucleus; GO:0006810 transport; GO:0006886 intracellular protein transport; GO:0006913 nucleocytoplasmic transport; GO:0006915 apoptotic process; GO:0008104 protein localization; GO:0008219 cell death; GO:0008283 cell population proliferation; GO:0009987 cellular process; GO:0012501 programmed cell death; GO:0015031 protein tra…	GO:0005622 intracellular; GO:0005623 cell; GO:0005634 nucleus; GO:0005635 nuclear envelope; GO:0005654 nucleoplasm; GO:0005737 cytoplasm; GO:0005829 cytosol; GO:0012505 endomembrane system; GO:0031967 organelle envelope; GO:0031974 membrane-enclosed lumen; GO:0031975 envelope; GO:0031981 nuclear lumen; GO:0043226 organelle; GO:0043227 membrane-bounded organelle; GO:0043229 intracellular organelle…	GO:0005049 nuclear export signal receptor activity; GO:0140104 molecular carrier activity; GO:0140142 nucleocytoplasmic carrier activity;
O00401	Neural Wiskott-Aldrich syndrome protein OS=Homo sapiens OX=9606 GN=WASL PE=1 SV=2	WASL	5	3	13	3	3	54.8	3.11819e+06			388883	1.62806e+06	1.00255e+06	1.86603e+06	2.60049e+06	669269	1980800	605458	2.73259e+06	2768904	2.51925e+06	1.89074e+06	1.452			0.329	0.896	0.704	1.283	1.591	0.668	1.004	0.405	0.956	0.926	1.223	1.322	1.233	0.361678	mitochondria	K23612	WASL; neural Wiskott-Aldrich syndrome protein	hsa05131 Shigellosis; hsa05132 Salmonella infection; hsa04810 Regulation of actin cytoskeleton; hsa05100 Bacterial invasion of epithelial cells; hsa05130 Pathogenic Escherichia coli infection; hsa04520 Adherens junction; hsa04144 Endocytosis; hsa05135 Yersinia infection	GO:0000902 cell morphogenesis; GO:0000904 cell morphogenesis involved in differentiation; GO:0002252 immune effector process; GO:0002253 activation of immune response; GO:0002376 immune system process; GO:0002429 immune response-activating cell surface receptor signaling pathway; GO:0002431 Fc receptor mediated stimulatory signaling pathway; GO:0002433 immune response-regulating cell surface rece…	GO:0000139 Golgi membrane; GO:0005622 intracellular; GO:0005623 cell; GO:0005737 cytoplasm; GO:0005794 Golgi apparatus; GO:0005829 cytosol; GO:0005856 cytoskeleton; GO:0005886 plasma membrane; GO:0005938 cell cortex; GO:0012505 endomembrane system; GO:0012506 vesicle membrane; GO:0015629 actin cytoskeleton; GO:0016020 membrane; GO:0030027 lamellipodium; GO:0030139 endocytic vesicle; GO:0030478 ac…	GO:0005488 binding; GO:0005515 protein binding; GO:0008092 cytoskeletal protein binding; GO:0030234 enzyme regulator activity; GO:0030695 GTPase regulator activity; GO:0042802 identical protein binding; GO:0060589 nucleoside-triphosphatase regulator activity; GO:0098772 molecular function regulator;	PF00568; PF00786	WH1 domain; P21-Rho-binding domain
Q9Y5A9	YTH domain-containing family protein 2 OS=Homo sapiens OX=9606 GN=YTHDF2 PE=1 SV=2	YTHDF2	8	4	17	2	2	62.3	871683				373776	288538	856892	268697	965893	2.09243e+06	977520	2.22869e+06	1.85428e+06	1.27247e+06	293856	0.721				0.366	0.36	1.047	0.292	1.714	1.886	1.161	1.386	1.102	1.098	0.365	2.315	0.0948619	cytoplasm,nucleus	K20102			GO:0000003 reproduction; GO:0000902 cell morphogenesis; GO:0000904 cell morphogenesis involved in differentiation; GO:0001556 oocyte maturation; GO:0002376 immune system process; GO:0002682 regulation of immune system process; GO:0003006 developmental process involved in reproduction; GO:0006417 regulation of translation; GO:0006446 regulation of translational initiation; GO:0006955 immune respon…	GO:0000932 P-body; GO:0005622 intracellular; GO:0005623 cell; GO:0005634 nucleus; GO:0005737 cytoplasm; GO:0005815 microtubule organizing center; GO:0005829 cytosol; GO:0005856 cytoskeleton; GO:0015630 microtubule cytoskeleton; GO:0032991 protein-containing complex; GO:0035770 ribonucleoprotein granule; GO:0036464 cytoplasmic ribonucleoprotein granule; GO:0043226 organelle; GO:0043227 membrane-bo…	GO:0003676 nucleic acid binding; GO:0003723 RNA binding; GO:0005488 binding; GO:0097159 organic cyclic compound binding; GO:1901363 heterocyclic compound binding; GO:1990247 N6-methyladenosine-containing RNA binding;	PF04146	YT521-B-like domain
Q96S55	ATPase WRNIP1 OS=Homo sapiens OX=9606 GN=WRNIP1 PE=1 SV=2	WRNIP1	6	4	23	4	4	72.1	1.78185e+06	569796	97698.2		2.36848e+06	1.17668e+06	1.34868e+06	1.75669e+06	948045	3.5253e+06	2.06845e+06	5.49984e+06	5771011	2.28857e+06	1.72534e+06	0.687	0.679	0.163		1.079	0.684	0.767	0.89	0.783	1.48	1.144	1.593	1.597	0.92	0.999	1.717	0.0299744	nucleus	K07478			GO:0000731 DNA synthesis involved in DNA repair; GO:0006139 nucleobase-containing compound metabolic process; GO:0006259 DNA metabolic process; GO:0006275 regulation of DNA replication; GO:0006281 DNA repair; GO:0006725 cellular aromatic compound metabolic process; GO:0006807 nitrogen compound metabolic process; GO:0006950 response to stress; GO:0006974 cellular response to DNA damage stimulus; G…	GO:0005622 intracellular; GO:0005623 cell; GO:0005634 nucleus; GO:0005737 cytoplasm; GO:0043226 organelle; GO:0043227 membrane-bounded organelle; GO:0043229 intracellular organelle; GO:0043231 intracellular membrane-bounded organelle; GO:0048471 perinuclear region of cytoplasm;	GO:0003824 catalytic activity; GO:0005488 binding; GO:0005515 protein binding; GO:0016462 pyrophosphatase activity; GO:0016787 hydrolase activity; GO:0016817 hydrolase activity, acting on acid anhydrides; GO:0016818 hydrolase activity, acting on acid anhydrides, in phosphorus-containing anhydrides; GO:0016887 ATPase activity; GO:0017111 nucleoside-triphosphatase activity; GO:0042802 identical pro…	PF00004; PF12002	ATPase family associated with various cellular activities (AAA); MgsA AAA+ ATPase C terminal
O75083	WD repeat-containing protein 1 OS=Homo sapiens OX=9606 GN=WDR1 PE=1 SV=4	WDR1	53	24	323	24	24	66.2	1.20941e+08	3.62739e+07	1.59005e+07	7.82416e+07	7.49743e+07	8.55557e+07	7.88434e+07	7.28361e+07	5.06019e+07	1.25955e+08	7.22067e+07	1.37705e+08	1.62698e+08	8.97905e+07	5.36495e+07	1.229	1.141	0.702	1.446	0.901	1.311	1.183	0.973	1.103	1.395	1.054	1.052	1.188	0.952	0.819	0.963	0.855229	cytoplasm	K24736			GO:0000902 cell morphogenesis; GO:0000904 cell morphogenesis involved in differentiation; GO:0001736 establishment of planar polarity; GO:0001738 morphogenesis of a polarized epithelium; GO:0002009 morphogenesis of an epithelium; GO:0002252 immune effector process; GO:0002376 immune system process; GO:0002443 leukocyte mediated immunity; GO:0002444 myeloid leukocyte mediated immunity; GO:0002446 …	GO:0005576 extracellular region; GO:0005622 intracellular; GO:0005623 cell; GO:0005737 cytoplasm; GO:0005829 cytosol; GO:0005856 cytoskeleton; GO:0005884 actin filament; GO:0005886 plasma membrane; GO:0005911 cell-cell junction; GO:0005938 cell cortex; GO:0015629 actin cytoskeleton; GO:0016020 membrane; GO:0030054 cell junction; GO:0030863 cortical cytoskeleton; GO:0030864 cortical actin cytoskel…	GO:0003779 actin binding; GO:0005488 binding; GO:0005515 protein binding; GO:0008092 cytoskeletal protein binding; GO:0044877 protein-containing complex binding; GO:0051015 actin filament binding;
Q8NEZ2	Vacuolar protein sorting-associated protein 37A OS=Homo sapiens OX=9606 GN=VPS37A PE=1 SV=1	VPS37A	5	1	5	1	1	44.3	210159				201834								250589		107316																		mitochondria	K12185	VPS37; ESCRT-I complex subunit VPS37	hsa04144 Endocytosis	GO:0006508 proteolysis; GO:0006511 ubiquitin-dependent protein catabolic process; GO:0006807 nitrogen compound metabolic process; GO:0006810 transport; GO:0006914 autophagy; GO:0006996 organelle organization; GO:0007032 endosome organization; GO:0008152 metabolic process; GO:0009056 catabolic process; GO:0009057 macromolecule catabolic process; GO:0009987 cellular process; GO:0010256 endomembrane…	GO:0000813 ESCRT I complex; GO:0005622 intracellular; GO:0005623 cell; GO:0005634 nucleus; GO:0005654 nucleoplasm; GO:0005737 cytoplasm; GO:0005768 endosome; GO:0005770 late endosome; GO:0005813 centrosome; GO:0005815 microtubule organizing center; GO:0005829 cytosol; GO:0005856 cytoskeleton; GO:0010008 endosome membrane; GO:0012505 endomembrane system; GO:0015630 microtubule cytoskeleton; GO:001…		PF07200	Modifier of rudimentary (Mod(r)) protein
Q4G0F5	Vacuolar protein sorting-associated protein 26B OS=Homo sapiens OX=9606 GN=VPS26B PE=1 SV=2	VPS26B	11	4	23	3	3	39.1		375324						1.14883e+06				2.98167e+06	2.24324e+06	1.43736e+06			0.604						0.785				1.165	0.838	0.779		1.476		cytoplasm	K18466	VPS26; vacuolar protein sorting-associated protein 26	hsa04144 Endocytosis	GO:0002376 immune system process; GO:0006810 transport; GO:0006886 intracellular protein transport; GO:0006950 response to stress; GO:0006952 defense response; GO:0006955 immune response; GO:0008104 protein localization; GO:0009894 regulation of catabolic process; GO:0009987 cellular process; GO:0010033 response to organic substance; GO:0010506 regulation of autophagy; GO:0015031 protein transpor…	GO:0005622 intracellular; GO:0005623 cell; GO:0005737 cytoplasm; GO:0005768 endosome; GO:0005769 early endosome; GO:0005770 late endosome; GO:0012505 endomembrane system; GO:0016020 membrane; GO:0030139 endocytic vesicle; GO:0030904 retromer complex; GO:0030906 retromer, cargo-selective complex; GO:0031410 cytoplasmic vesicle; GO:0031982 vesicle; GO:0032991 protein-containing complex; GO:0043226 …	GO:0005215 transporter activity;
Q9UIA9	Exportin-7 OS=Homo sapiens OX=9606 GN=XPO7 PE=1 SV=3	XPO7	12	13	77	13	13	123.8	6.22591e+06	4.11896e+06	3.68542e+06	7.84028e+06	8.73791e+06	6.60895e+06	6.42014e+06	2.4236e+07	3.57522e+06	8.28335e+06	7.39774e+06	1.01883e+07	9.84259e+06	1.00654e+07	7.95191e+06	0.635	1.3	1.632	1.454	1.054	1.017	0.967	3.249	0.782	0.92	1.083	0.781	0.721	1.071	1.218	1.014	0.791896	nucleus	K18460	XPO7; exportin-7	hsa03013 Nucleocytoplasmic transport	GO:0006611 protein export from nucleus; GO:0006810 transport; GO:0006886 intracellular protein transport; GO:0006913 nucleocytoplasmic transport; GO:0008104 protein localization; GO:0015031 protein transport; GO:0015833 peptide transport; GO:0033036 macromolecule localization; GO:0034613 cellular protein localization; GO:0042886 amide transport; GO:0045184 establishment of protein localization; G…	GO:0005622 intracellular; GO:0005623 cell; GO:0005634 nucleus; GO:0005635 nuclear envelope; GO:0005643 nuclear pore; GO:0005737 cytoplasm; GO:0012505 endomembrane system; GO:0031967 organelle envelope; GO:0031975 envelope; GO:0032991 protein-containing complex; GO:0043226 organelle; GO:0043227 membrane-bounded organelle; GO:0043229 intracellular organelle; GO:0043231 intracellular membrane-bounde…	GO:0005049 nuclear export signal receptor activity; GO:0005488 binding; GO:0005515 protein binding; GO:0008536 Ran GTPase binding; GO:0017016 Ras GTPase binding; GO:0019899 enzyme binding; GO:0031267 small GTPase binding; GO:0051020 GTPase binding; GO:0140104 molecular carrier activity; GO:0140142 nucleocytoplasmic carrier activity;
Q8NI36	WD repeat-containing protein 36 OS=Homo sapiens OX=9606 GN=WDR36 PE=1 SV=1	WDR36	8	7	26	7	7	105.3	1.31936e+06	322098	565474		1.35331e+06	740792	1.51571e+06	3296073	647461	1.74601e+06	1.39203e+06	6.4053e+06	7.50513e+06	1.81284e+06	1.55556e+06	0.521	0.394	0.97		0.632	0.441	0.884	1.711	0.548	0.751	0.789	1.901	2.129	0.747	0.923	1.95	0.0292673	cytoplasm,nucleus	K14554	UTP21; U3 small nucleolar RNA-associated protein 21	hsa03008 Ribosome biogenesis in eukaryotes	GO:0006139 nucleobase-containing compound metabolic process; GO:0006364 rRNA processing; GO:0006396 RNA processing; GO:0006725 cellular aromatic compound metabolic process; GO:0006807 nitrogen compound metabolic process; GO:0008152 metabolic process; GO:0009987 cellular process; GO:0010467 gene expression; GO:0016070 RNA metabolic process; GO:0016072 rRNA metabolic process; GO:0022613 ribonucleop…	GO:0005622 intracellular; GO:0005623 cell; GO:0005634 nucleus; GO:0005654 nucleoplasm; GO:0005730 nucleolus; GO:0030684 preribosome; GO:0030686 90S preribosome; GO:0031974 membrane-enclosed lumen; GO:0031981 nuclear lumen; GO:0032040 small-subunit processome; GO:0032991 protein-containing complex; GO:0034388 Pwp2p-containing subcomplex of 90S preribosome; GO:0043226 organelle; GO:0043227 membrane…		PF04192	Utp21 specific WD40 associated putative domain
Q9NQH7	Xaa-Pro aminopeptidase 3 OS=Homo sapiens OX=9606 GN=XPNPEP3 PE=1 SV=1	XPNPEP3	3	2	12	1	1	57												690129	308181																				mitochondria	K01262			GO:0003008 system process; GO:0003014 renal system process; GO:0003094 glomerular filtration; GO:0006508 proteolysis; GO:0006807 nitrogen compound metabolic process; GO:0008152 metabolic process; GO:0010467 gene expression; GO:0016485 protein processing; GO:0019538 protein metabolic process; GO:0032501 multicellular organismal process; GO:0043170 macromolecule metabolic process; GO:0044238 primar…	GO:0005622 intracellular; GO:0005623 cell; GO:0005737 cytoplasm; GO:0005739 mitochondrion; GO:0043226 organelle; GO:0043227 membrane-bounded organelle; GO:0043229 intracellular organelle; GO:0043231 intracellular membrane-bounded organelle;	GO:0003824 catalytic activity; GO:0004177 aminopeptidase activity; GO:0005488 binding; GO:0005515 protein binding; GO:0008233 peptidase activity; GO:0008235 metalloexopeptidase activity; GO:0008237 metallopeptidase activity; GO:0008238 exopeptidase activity; GO:0016787 hydrolase activity; GO:0030145 manganese ion binding; GO:0042802 identical protein binding; GO:0042803 protein homodimerization a…	PF05195; PF00557	Aminopeptidase P, N-terminal domain; Metallopeptidase family M24
P98170	E3 ubiquitin-protein ligase XIAP OS=Homo sapiens OX=9606 GN=XIAP PE=1 SV=2	XIAP	4	1	3	1	1	56.6	214884											164718																					cytoplasm	K04725	XIAP; E3 ubiquitin-protein ligase XIAP [EC:2.3.2.27]	hsa04215 Apoptosis - multiple species; hsa04510 Focal adhesion; hsa05166 Human T-cell leukemia virus 1 infection; hsa05200 Pathways in cancer; hsa05207 Chemical carcinogenesis - receptor activation; hsa05222 Small cell lung cancer; hsa04621 NOD-like receptor signaling pathway; hsa01524 Platinum drug resistance; hsa04064 NF-kappa B signaling pathway; hsa04210 Apoptosis; hsa05145 Toxoplasmosis; hsa…	GO:0002682 regulation of immune system process; GO:0006355 regulation of transcription, DNA-templated; GO:0006357 regulation of transcription by RNA polymerase II; GO:0006464 cellular protein modification process; GO:0006807 nitrogen compound metabolic process; GO:0006915 apoptotic process; GO:0006950 response to stress; GO:0006974 cellular response to DNA damage stimulus; GO:0008152 metabolic pr…	GO:0005622 intracellular; GO:0005623 cell; GO:0005634 nucleus; GO:0005654 nucleoplasm; GO:0005737 cytoplasm; GO:0005829 cytosol; GO:0031974 membrane-enclosed lumen; GO:0031981 nuclear lumen; GO:0032991 protein-containing complex; GO:0043226 organelle; GO:0043227 membrane-bounded organelle; GO:0043229 intracellular organelle; GO:0043231 intracellular membrane-bounded organelle; GO:0043233 organell…	GO:0002020 protease binding; GO:0003824 catalytic activity; GO:0004842 ubiquitin-protein transferase activity; GO:0004857 enzyme inhibitor activity; GO:0004866 endopeptidase inhibitor activity; GO:0004869 cysteine-type endopeptidase inhibitor activity; GO:0005488 binding; GO:0005515 protein binding; GO:0016740 transferase activity; GO:0019787 ubiquitin-like protein transferase activity; GO:001989…	PF00653; PF13920	Inhibitor of Apoptosis domain; Zinc finger, C3HC4 type (RING finger)
P47914	60S ribosomal protein L29 OS=Homo sapiens OX=9606 GN=RPL29 PE=1 SV=2	RPL29	9	1	17	1	1	17.7	2.84536e+07			3.22987e+06	8748401	7.12193e+06	13549618	13574487		9.07358e+06	1.43038e+07	3.89945e+07	4.63397e+07	2.4462e+07	1.40397e+07																		nucleus	K02905	RP-L29e; large subunit ribosomal protein L29e	hsa03010 Ribosome; hsa05171 Coronavirus disease - COVID-19	GO:0000003 reproduction; GO:0000184 nuclear-transcribed mRNA catabolic process, nonsense-mediated decay; GO:0000956 nuclear-transcribed mRNA catabolic process; GO:0002181 cytoplasmic translation; GO:0006139 nucleobase-containing compound metabolic process; GO:0006401 RNA catabolic process; GO:0006402 mRNA catabolic process; GO:0006412 translation; GO:0006413 translational initiation; GO:0006518 p…	GO:0005622 intracellular; GO:0005623 cell; GO:0005737 cytoplasm; GO:0005783 endoplasmic reticulum; GO:0005789 endoplasmic reticulum membrane; GO:0005791 rough endoplasmic reticulum; GO:0005829 cytosol; GO:0005840 ribosome; GO:0012505 endomembrane system; GO:0015934 large ribosomal subunit; GO:0016020 membrane; GO:0022625 cytosolic large ribosomal subunit; GO:0022626 cytosolic ribosome; GO:0030867…	GO:0003735 structural constituent of ribosome; GO:0005198 structural molecule activity; GO:0005488 binding; GO:0005539 glycosaminoglycan binding; GO:0008201 heparin binding; GO:0043167 ion binding; GO:0043168 anion binding; GO:0097367 carbohydrate derivative binding; GO:1901681 sulfur compound binding;
P09493	Tropomyosin alpha-1 chain OS=Homo sapiens OX=9606 GN=TPM1 PE=1 SV=2	TPM1	55	20	375	8	21	32.7	4.81394e+08	1.16117e+08	1.01228e+08	3.78882e+08	3.77917e+08	2.86059e+08	2.78816e+08	2.37242e+08	1.4043e+08	3.90496e+08	1.72917e+08	1.84294e+08	3.62741e+08	2.1152e+08	1.39302e+08	1.593	1.189	1.454	2.278	1.478	1.427	1.362	1.031	0.996	1.407	0.821	0.458	0.862	0.73	0.692	0.592	0.00420581	cytoplasm	K10373	TPM1; tropomyosin 1	hsa04260 Cardiac muscle contraction; hsa05410 Hypertrophic cardiomyopathy; hsa05206 MicroRNAs in cancer; hsa05414 Dilated cardiomyopathy; hsa04261 Adrenergic signaling in cardiomyocytes	GO:0000302 response to reactive oxygen species; GO:0001701 in utero embryonic development; GO:0001993 regulation of systemic arterial blood pressure by norepinephrine-epinephrine; GO:0001996 positive regulation of heart rate by epinephrine-norepinephrine; GO:0002027 regulation of heart rate; GO:0003007 heart morphogenesis; GO:0003008 system process; GO:0003012 muscle system process; GO:0003013 ci…	GO:0001725 stress fiber; GO:0001726 ruffle; GO:0005622 intracellular; GO:0005623 cell; GO:0005737 cytoplasm; GO:0005829 cytosol; GO:0005856 cytoskeleton; GO:0005862 muscle thin filament tropomyosin; GO:0005865 striated muscle thin filament; GO:0005884 actin filament; GO:0005886 plasma membrane; GO:0015629 actin cytoskeleton; GO:0016020 membrane; GO:0030016 myofibril; GO:0030017 sarcomere; GO:0031…	GO:0003779 actin binding; GO:0005198 structural molecule activity; GO:0005200 structural constituent of cytoskeleton; GO:0005488 binding; GO:0005515 protein binding; GO:0008092 cytoskeletal protein binding; GO:0008307 structural constituent of muscle; GO:0019904 protein domain specific binding; GO:0042802 identical protein binding; GO:0042803 protein homodimerization activity; GO:0044877 protein-…
Q9NXH9	tRNA (guanine(26)-N(2))-dimethyltransferase OS=Homo sapiens OX=9606 GN=TRMT1 PE=1 SV=1	TRMT1	7	5	25	5	5	72.2	2.33431e+06	932208	54876.5	1.12113e+06	834940	671512	941387	1.42779e+06	995662	2.45517e+06	2.05402e+06	4.52305e+06	5.25089e+06	2.52003e+06	953293	1.101	1.36	0.112	0.961	0.466	0.478	0.656	0.885	1.007	1.261	1.391	1.603	1.779	1.24	0.675	1.563	0.0716152	mitochondria	K00555			GO:0001510 RNA methylation; GO:0002940 tRNA N2-guanine methylation; GO:0006139 nucleobase-containing compound metabolic process; GO:0006396 RNA processing; GO:0006399 tRNA metabolic process; GO:0006400 tRNA modification; GO:0006725 cellular aromatic compound metabolic process; GO:0006807 nitrogen compound metabolic process; GO:0008033 tRNA processing; GO:0008152 metabolic process; GO:0009451 RNA …	GO:0005622 intracellular; GO:0005623 cell; GO:0005634 nucleus; GO:0005654 nucleoplasm; GO:0005737 cytoplasm; GO:0005739 mitochondrion; GO:0031974 membrane-enclosed lumen; GO:0031981 nuclear lumen; GO:0043226 organelle; GO:0043227 membrane-bounded organelle; GO:0043229 intracellular organelle; GO:0043231 intracellular membrane-bounded organelle; GO:0043233 organelle lumen; GO:0070013 intracellular…	GO:0003824 catalytic activity; GO:0004809 tRNA (guanine-N2-)-methyltransferase activity; GO:0008168 methyltransferase activity; GO:0008170 N-methyltransferase activity; GO:0008173 RNA methyltransferase activity; GO:0008175 tRNA methyltransferase activity; GO:0008757 S-adenosylmethionine-dependent methyltransferase activity; GO:0016423 tRNA (guanine) methyltransferase activity; GO:0016740 transfer…
Q5T0D9	Tumor protein p63-regulated gene 1-like protein OS=Homo sapiens OX=9606 GN=TPRG1L PE=1 SV=1	TPRG1L	7	1	3	1	1	30.2	377298	107406		509079	462986	491128	1.43018e+06	827245	101597	838206	700187	748286		397988	282730																		cytoplasm					GO:0005622 intracellular; GO:0005623 cell; GO:0005737 cytoplasm; GO:0008021 synaptic vesicle; GO:0012505 endomembrane system; GO:0030133 transport vesicle; GO:0031410 cytoplasmic vesicle; GO:0031982 vesicle; GO:0043226 organelle; GO:0043227 membrane-bounded organelle; GO:0043229 intracellular organelle; GO:0045202 synapse; GO:0070382 exocytic vesicle; GO:0097708 intracellular vesicle; GO:0098793 …	GO:0005488 binding; GO:0005515 protein binding; GO:0042802 identical protein binding;
Q9Y4G6	Talin-2 OS=Homo sapiens OX=9606 GN=TLN2 PE=1 SV=4	TLN2	11	26	233	12	12	271.4	1.81536e+07	6.59711e+06	5.45603e+06	8.10878e+06	1.23373e+07	1.56241e+07	1.29855e+07	1.73633e+07	1.22991e+07	2.18196e+07	1.42595e+07	1.77316e+07	2.29313e+07	1.40436e+07	1.03703e+07	1.104	1.241	1.44	0.896	0.886	1.432	1.165	1.387	1.603	1.445	1.244	0.81	1.001	0.89	0.947	0.999	0.96111	cytoplasm	K06271	TLN; talin	hsa04510 Focal adhesion; hsa04015 Rap1 signaling pathway; hsa04611 Platelet activation; hsa05166 Human T-cell leukemia virus 1 infection; hsa05131 Shigellosis	GO:0007043 cell-cell junction assembly; GO:0007155 cell adhesion; GO:0009987 cellular process; GO:0016043 cellular component organization; GO:0022607 cellular component assembly; GO:0022610 biological adhesion; GO:0034329 cell junction assembly; GO:0034330 cell junction organization; GO:0044085 cellular component biogenesis; GO:0045216 cell-cell junction organization; GO:0071840 cellular componen…	GO:0005622 intracellular; GO:0005623 cell; GO:0005856 cytoskeleton; GO:0005911 cell-cell junction; GO:0005912 adherens junction; GO:0005916 fascia adherens; GO:0014704 intercalated disc; GO:0015629 actin cytoskeleton; GO:0030054 cell junction; GO:0043226 organelle; GO:0043228 non-membrane-bounded organelle; GO:0043229 intracellular organelle; GO:0043232 intracellular non-membrane-bounded organell…	GO:0003779 actin binding; GO:0005198 structural molecule activity; GO:0005488 binding; GO:0005515 protein binding; GO:0008092 cytoskeletal protein binding;	PF09379; PF00373; PF09141; PF08913	FERM N-terminal domain ; FERM central domain; Talin, middle domain; Vinculin Binding Site
Q3KQV9	UDP-N-acetylhexosamine pyrophosphorylase-like protein 1 OS=Homo sapiens OX=9606 GN=UAP1L1 PE=1 SV=2	UAP1L1	14	7	54	6	7	57	3.38002e+06	265207	125737	1.61603e+06	2.76145e+06	1.53499e+06	577546	1.96345e+06	726127	3.78838e+06	1.70944e+06	2.85206e+06	4.48138e+06	3.17047e+06	2.10414e+06	1.39	0.337	0.224	1.208	1.342	0.952	0.351	1.061	0.64	1.697	1.009	0.881	1.323	1.36	1.299	1.176	0.397503	nucleus	K00972	UAP1; UDP-N-acetylglucosamine/UDP-N-acetylgalactosamine diphosphorylase [EC:2.7.7.23 2.7.7.83]	hsa01250 Biosynthesis of nucleotide sugars; hsa00520 Amino sugar and nucleotide sugar metabolism; hsa01100 Metabolic pathways	GO:0006040 amino sugar metabolic process; GO:0006047 UDP-N-acetylglucosamine metabolic process; GO:0006048 UDP-N-acetylglucosamine biosynthetic process; GO:0006139 nucleobase-containing compound metabolic process; GO:0006725 cellular aromatic compound metabolic process; GO:0006793 phosphorus metabolic process; GO:0006807 nitrogen compound metabolic process; GO:0008152 metabolic process; GO:000905…	GO:0005622 intracellular; GO:0005623 cell; GO:0005737 cytoplasm; GO:0005829 cytosol;	GO:0003824 catalytic activity; GO:0003977 UDP-N-acetylglucosamine diphosphorylase activity; GO:0016740 transferase activity; GO:0016772 transferase activity, transferring phosphorus-containing groups; GO:0016779 nucleotidyltransferase activity; GO:0070569 uridylyltransferase activity;
P62328	Thymosin beta-4 OS=Homo sapiens OX=9606 GN=TMSB4X PE=1 SV=2	TMSB4X	77	5	104	4	5	5.1	6.54929e+08	3.25676e+07	2.14658e+07	1.33479e+08	151965878	1.26501e+08	9.88439e+07	1.15997e+08	55221988	1.21971e+08	2.11471e+08	1.28692e+08	3.67469e+08	1.83005e+08	79425279	3.368	0.518	0.479	1.248	0.924	0.981	0.751	0.784	0.609	0.683	1.561	0.497	1.357	0.982	0.613	0.695	0.492868	nucleus	K05764	TMSB4; thymosin, beta 4	hsa04810 Regulation of actin cytoskeleton	GO:0001817 regulation of cytokine production; GO:0001818 negative regulation of cytokine production; GO:0002576 platelet degranulation; GO:0002791 regulation of peptide secretion; GO:0002792 negative regulation of peptide secretion; GO:0006140 regulation of nucleotide metabolic process; GO:0006355 regulation of transcription, DNA-templated; GO:0006810 transport; GO:0006887 exocytosis; GO:0007154 …	GO:0005622 intracellular; GO:0005623 cell; GO:0005634 nucleus; GO:0005737 cytoplasm; GO:0005829 cytosol; GO:0005856 cytoskeleton; GO:0012505 endomembrane system; GO:0030141 secretory granule; GO:0031091 platelet alpha granule; GO:0031093 platelet alpha granule lumen; GO:0031410 cytoplasmic vesicle; GO:0031974 membrane-enclosed lumen; GO:0031982 vesicle; GO:0031983 vesicle lumen; GO:0034774 secret…	GO:0003779 actin binding; GO:0003785 actin monomer binding; GO:0005488 binding; GO:0005515 protein binding; GO:0008092 cytoskeletal protein binding; GO:0019899 enzyme binding;
Q6IBS0	Twinfilin-2 OS=Homo sapiens OX=9606 GN=TWF2 PE=1 SV=2	TWF2	39	10	85	8	10	39.5	9.76231e+06	4.23246e+06	1.02416e+06	9.93886e+06	1.06376e+07	6.56716e+06	1.14443e+07	1.01799e+07	4.53824e+06	1.59625e+07	8.91429e+06	1.69721e+07	1.71191e+07	1.41639e+07	7.00099e+06	0.84	1.126	0.382	1.554	1.081	0.852	1.453	1.151	0.837	1.495	1.101	1.097	1.057	1.271	0.904	1.184	0.202027	cytoplasm	K08870			GO:0001101 response to acid chemical; GO:0001558 regulation of cell growth; GO:0007154 cell communication; GO:0007165 signal transduction; GO:0007275 multicellular organism development; GO:0007399 nervous system development; GO:0008064 regulation of actin polymerization or depolymerization; GO:0008104 protein localization; GO:0008361 regulation of cell size; GO:0009987 cellular process; GO:001003…	GO:0005622 intracellular; GO:0005623 cell; GO:0005737 cytoplasm; GO:0030016 myofibril; GO:0030027 lamellipodium; GO:0030175 filopodium; GO:0030424 axon; GO:0030426 growth cone; GO:0030427 site of polarized growth; GO:0031252 cell leading edge; GO:0032420 stereocilium; GO:0032421 stereocilium bundle; GO:0042995 cell projection; GO:0043005 neuron projection; GO:0043226 organelle; GO:0043228 non-mem…	GO:0000166 nucleotide binding; GO:0003779 actin binding; GO:0003785 actin monomer binding; GO:0005080 protein kinase C binding; GO:0005488 binding; GO:0005515 protein binding; GO:0005524 ATP binding; GO:0005543 phospholipid binding; GO:0005546 phosphatidylinositol-4,5-bisphosphate binding; GO:0008092 cytoskeletal protein binding; GO:0008144 drug binding; GO:0008289 lipid binding; GO:0017076 purin…	PF00241	Cofilin/tropomyosin-type actin-binding protein
Q9UMX0	Ubiquilin-1 OS=Homo sapiens OX=9606 GN=UBQLN1 PE=1 SV=2	UBQLN1	18	7	72	2	3	62.5	2.47975e+06	232605	305201	1.0418e+06	3.02315e+06	1.45809e+06	3.39203e+06	5.0395e+06	2.13051e+06	4.6215e+06	2.55021e+06	7.52096e+06	6.18724e+06	4.2678e+06	3.68212e+06	0.661	0.192	0.353	0.504	0.952	0.586	1.334	1.764	1.217	1.341	0.975	1.506	1.184	1.186	1.473	2.459	0.000191972	nucleus	K04523	UBQLN; ubiquilin	hsa05014 Amyotrophic lateral sclerosis; hsa04141 Protein processing in endoplasmic reticulum	GO:0000045 autophagosome assembly; GO:0001666 response to hypoxia; GO:0002682 regulation of immune system process; GO:0002683 negative regulation of immune system process; GO:0006508 proteolysis; GO:0006511 ubiquitin-dependent protein catabolic process; GO:0006807 nitrogen compound metabolic process; GO:0006914 autophagy; GO:0006950 response to stress; GO:0006996 organelle organization; GO:000703…	GO:0005622 intracellular; GO:0005623 cell; GO:0005634 nucleus; GO:0005654 nucleoplasm; GO:0005737 cytoplasm; GO:0005773 vacuole; GO:0005776 autophagosome; GO:0005783 endoplasmic reticulum; GO:0005829 cytosol; GO:0005886 plasma membrane; GO:0012505 endomembrane system; GO:0016020 membrane; GO:0016234 inclusion body; GO:0016235 aggresome; GO:0031974 membrane-enclosed lumen; GO:0031981 nuclear lumen…	GO:0005102 signaling receptor binding; GO:0005488 binding; GO:0005515 protein binding; GO:0019215 intermediate filament binding; GO:0019899 enzyme binding; GO:0019900 kinase binding; GO:0019904 protein domain specific binding; GO:0031593 polyubiquitin modification-dependent protein binding; GO:0042802 identical protein binding; GO:0044877 protein-containing complex binding; GO:0140030 modificatio…	PF00240; PF00627	Ubiquitin family; UBA/TS-N domain
Q5BJH7	Protein YIF1B OS=Homo sapiens OX=9606 GN=YIF1B PE=1 SV=1	YIF1B	8	1	1	1	1	34.4																																	plasma membrane	K20362			GO:0006810 transport; GO:0006888 endoplasmic reticulum to Golgi vesicle-mediated transport; GO:0016192 vesicle-mediated transport; GO:0046907 intracellular transport; GO:0048193 Golgi vesicle transport; GO:0051179 localization; GO:0051234 establishment of localization; GO:0051641 cellular localization; GO:0051649 establishment of localization in cell;	GO:0000139 Golgi membrane; GO:0005622 intracellular; GO:0005623 cell; GO:0005737 cytoplasm; GO:0005783 endoplasmic reticulum; GO:0005789 endoplasmic reticulum membrane; GO:0005793 endoplasmic reticulum-Golgi intermediate compartment; GO:0005794 Golgi apparatus; GO:0005798 Golgi-associated vesicle; GO:0012505 endomembrane system; GO:0016020 membrane; GO:0016021 integral component of membrane; GO:0…
P25311	Zinc-alpha-2-glycoprotein OS=Homo sapiens OX=9606 GN=AZGP1 PE=1 SV=2	AZGP1	46	16	246	16	16	34.2	2.22211e+07	2.36213e+07	3.65959e+07	1.16323e+08	9.36286e+07	6.93158e+07	2.48428e+07	7.70113e+07	2.38981e+07	5.12801e+07	6.72185e+07	4.82571e+07	8.8772e+07	4.59927e+07	9.3404e+07	0.322	1.058	2.299	3.059	1.601	1.513	0.531	1.464	0.741	0.808	1.397	0.525	0.923	0.694	2.03	0.617	0.256637	extracellular				GO:0001580 detection of chemical stimulus involved in sensory perception of bitter taste; GO:0003008 system process; GO:0006139 nucleobase-containing compound metabolic process; GO:0006725 cellular aromatic compound metabolic process; GO:0006807 nitrogen compound metabolic process; GO:0006810 transport; GO:0007155 cell adhesion; GO:0007600 sensory perception; GO:0007606 sensory perception of chem…	GO:0005576 extracellular region; GO:0005615 extracellular space; GO:0005623 cell; GO:0005886 plasma membrane; GO:0016020 membrane; GO:0071944 cell periphery;	GO:0003824 catalytic activity; GO:0004518 nuclease activity; GO:0004540 ribonuclease activity; GO:0005215 transporter activity; GO:0008320 protein transmembrane transporter activity; GO:0016787 hydrolase activity; GO:0016788 hydrolase activity, acting on ester bonds; GO:0022857 transmembrane transporter activity; GO:0022884 macromolecule transmembrane transporter activity; GO:0042887 amide transm…	PF00129; PF07654	Class I Histocompatibility antigen, domains alpha 1 and 2; Immunoglobulin C1-set domain
Q96TA2	ATP-dependent zinc metalloprotease YME1L1 OS=Homo sapiens OX=9606 GN=YME1L1 PE=1 SV=2	YME1L1	1	1	1	1	1	86.4					134705	272569		123217	257299			308233	668038																				plasma membrane	K08955			GO:0006508 proteolysis; GO:0006515 protein quality control for misfolded or incompletely synthesized proteins; GO:0006807 nitrogen compound metabolic process; GO:0006996 organelle organization; GO:0007005 mitochondrion organization; GO:0008152 metabolic process; GO:0008283 cell population proliferation; GO:0009056 catabolic process; GO:0009057 macromolecule catabolic process; GO:0009987 cellular …	GO:0005622 intracellular; GO:0005623 cell; GO:0005634 nucleus; GO:0005654 nucleoplasm; GO:0005737 cytoplasm; GO:0005739 mitochondrion; GO:0005740 mitochondrial envelope; GO:0005743 mitochondrial inner membrane; GO:0016020 membrane; GO:0016604 nuclear body; GO:0019866 organelle inner membrane; GO:0031090 organelle membrane; GO:0031966 mitochondrial membrane; GO:0031967 organelle envelope; GO:00319…	GO:0003824 catalytic activity; GO:0004176 ATP-dependent peptidase activity; GO:0008233 peptidase activity; GO:0008237 metallopeptidase activity; GO:0016462 pyrophosphatase activity; GO:0016787 hydrolase activity; GO:0016817 hydrolase activity, acting on acid anhydrides; GO:0016818 hydrolase activity, acting on acid anhydrides, in phosphorus-containing anhydrides; GO:0016887 ATPase activity; GO:00…	PF00004; PF01434	ATPase family associated with various cellular activities (AAA); Peptidase family M41
O75832	26S proteasome non-ATPase regulatory subunit 10 OS=Homo sapiens OX=9606 GN=PSMD10 PE=1 SV=1	PSMD10	8	1	2	1	1	24.4			341016		246992	161224	395159			467095	419628	720216	585653	306337	202389																		cytoplasm	K06694			GO:0000079 regulation of cyclin-dependent protein serine/threonine kinase activity; GO:0000122 negative regulation of transcription by RNA polymerase II; GO:0001558 regulation of cell growth; GO:0001932 regulation of protein phosphorylation; GO:0001933 negative regulation of protein phosphorylation; GO:0001934 positive regulation of protein phosphorylation; GO:0006355 regulation of transcription,…	GO:0000502 proteasome complex; GO:0005622 intracellular; GO:0005623 cell; GO:0005634 nucleus; GO:0005654 nucleoplasm; GO:0005737 cytoplasm; GO:0005829 cytosol; GO:0005838 proteasome regulatory particle; GO:0005856 cytoskeleton; GO:0022624 proteasome accessory complex; GO:0031974 membrane-enclosed lumen; GO:0031981 nuclear lumen; GO:0032991 protein-containing complex; GO:0043226 organelle; GO:0043…	GO:0005488 binding; GO:0005515 protein binding; GO:0008134 transcription factor binding;
P31939	Bifunctional purine biosynthesis protein ATIC OS=Homo sapiens OX=9606 GN=ATIC PE=1 SV=3	ATIC	62	29	248	29	29	64.6	3.45889e+07	1.23516e+07	1.75385e+07	2.24125e+07	2.53887e+07	2.32226e+07	2.62841e+07	3.68121e+07	2.01878e+07	6.261e+07	4.42903e+07	5.63425e+07	5.24445e+07	1.22374e+08	2.91627e+07	0.754	0.833	1.659	0.888	0.654	0.763	0.846	1.054	0.943	1.486	1.386	0.923	0.821	2.781	0.954	1.344	0.190676	cytoplasm	K00602	purH; phosphoribosylaminoimidazolecarboxamide formyltransferase / IMP cyclohydrolase [EC:2.1.2.3 3.5.4.10]	hsa00670 One carbon pool by folate; hsa01523 Antifolate resistance; hsa00230 Purine metabolism; hsa01100 Metabolic pathways	GO:0003360 brainstem development; GO:0006082 organic acid metabolic process; GO:0006139 nucleobase-containing compound metabolic process; GO:0006163 purine nucleotide metabolic process; GO:0006164 purine nucleotide biosynthetic process; GO:0006188 IMP biosynthetic process; GO:0006189 'de novo' IMP biosynthetic process; GO:0006575 cellular modified amino acid metabolic process; GO:0006725 cellular…	GO:0005622 intracellular; GO:0005623 cell; GO:0005737 cytoplasm; GO:0005829 cytosol; GO:0005886 plasma membrane; GO:0016020 membrane; GO:0071944 cell periphery;	GO:0003824 catalytic activity; GO:0003937 IMP cyclohydrolase activity; GO:0004643 phosphoribosylaminoimidazolecarboxamide formyltransferase activity; GO:0005488 binding; GO:0005515 protein binding; GO:0016740 transferase activity; GO:0016741 transferase activity, transferring one-carbon groups; GO:0016742 hydroxymethyl-, formyl- and related transferase activity; GO:0016787 hydrolase activity; GO:…	PF02142	MGS-like domain
O95758	Polypyrimidine tract-binding protein 3 OS=Homo sapiens OX=9606 GN=PTBP3 PE=1 SV=2	PTBP3	19	8	57	5	5	59.7	1.86354e+06	724661		846122	2.29239e+06	336130	1.38221e+06	2.36987e+06	1.7295e+06	3.52703e+06	770907	5.77235e+06	6.09193e+06	3.87357e+06	1.61066e+06	0.669	0.805		0.552	0.973	0.182	0.733	1.118	1.331	1.379	0.397	1.557	1.571	1.451	0.869	1.817	0.0470078	cytoskeleton	K17844			GO:0009653 anatomical structure morphogenesis; GO:0009892 negative regulation of metabolic process; GO:0010468 regulation of gene expression; GO:0010605 negative regulation of macromolecule metabolic process; GO:0010629 negative regulation of gene expression; GO:0019219 regulation of nucleobase-containing compound metabolic process; GO:0019222 regulation of metabolic process; GO:0031323 regulatio…		GO:0003676 nucleic acid binding; GO:0003723 RNA binding; GO:0005488 binding; GO:0097159 organic cyclic compound binding; GO:1901363 heterocyclic compound binding;	PF11835; PF13893; PF00076	Domain of unknown function (DUF3355); RNA recognition motif. (a.k.a. RRM, RBD, or RNP domain); RNA recognition motif. (a.k.a. RRM, RBD, or RNP domain)
Q96PZ0	Pseudouridylate synthase 7 homolog OS=Homo sapiens OX=9606 GN=PUS7 PE=1 SV=2	PUS7	5	3	9	3	3	75			464266		400302	1.96557e+06		663259		1.06732e+06	1.08112e+06	2.67701e+06	2553538	1.57985e+06	1.70356e+06			1.212		0.285	1.782		0.524		0.699	0.933	1.21	1.103	0.991	1.539	0.915	0.788306	cytoplasm	K06176			GO:0001522 pseudouridine synthesis; GO:0002682 regulation of immune system process; GO:0006139 nucleobase-containing compound metabolic process; GO:0006396 RNA processing; GO:0006399 tRNA metabolic process; GO:0006400 tRNA modification; GO:0006417 regulation of translation; GO:0006725 cellular aromatic compound metabolic process; GO:0006807 nitrogen compound metabolic process; GO:0008033 tRNA pro…	GO:0005622 intracellular; GO:0005623 cell; GO:0005634 nucleus; GO:0043226 organelle; GO:0043227 membrane-bounded organelle; GO:0043229 intracellular organelle; GO:0043231 intracellular membrane-bounded organelle;	GO:0003824 catalytic activity; GO:0005488 binding; GO:0005515 protein binding; GO:0009982 pseudouridine synthase activity; GO:0016853 isomerase activity; GO:0016866 intramolecular transferase activity; GO:0019899 enzyme binding;
O95980	Reversion-inducing cysteine-rich protein with Kazal motifs OS=Homo sapiens OX=9606 GN=RECK PE=1 SV=1	RECK	2	2	9	2	2	106.4	429308			1.17173e+06	1.41614e+06	1.20801e+06					478736	288899	552956	576784	501533	0.497			2.463	1.936	2.107					0.795	0.251	0.459	0.696	0.871	0.351	0.0507268	extracellular	K17461	RECK; reversion-inducing-cysteine-rich protein with kazal motifs	hsa05206 MicroRNAs in cancer	GO:0000003 reproduction; GO:0001568 blood vessel development; GO:0001944 vasculature development; GO:0001955 blood vessel maturation; GO:0007275 multicellular organism development; GO:0007565 female pregnancy; GO:0007566 embryo implantation; GO:0009653 anatomical structure morphogenesis; GO:0009790 embryo development; GO:0009892 negative regulation of metabolic process; GO:0009987 cellular proces…	GO:0005576 extracellular region; GO:0005623 cell; GO:0005886 plasma membrane; GO:0016020 membrane; GO:0071944 cell periphery;	GO:0004857 enzyme inhibitor activity; GO:0004866 endopeptidase inhibitor activity; GO:0008191 metalloendopeptidase inhibitor activity; GO:0030234 enzyme regulator activity; GO:0030414 peptidase inhibitor activity; GO:0061134 peptidase regulator activity; GO:0061135 endopeptidase regulator activity; GO:0098772 molecular function regulator;	PF07648	Kazal-type serine protease inhibitor domain
P51159	Ras-related protein Rab-27A OS=Homo sapiens OX=9606 GN=RAB27A PE=1 SV=3	RAB27A	25	5	53	3	5	24.9	3.74366e+06	1.98714e+06	312037	4.6827e+06	2.46608e+06	2.05909e+06	3029017	4.34302e+06	1.48118e+06	4.32557e+06	3.28437e+06	7.38762e+06	8.39483e+06	9.7678e+06	4.4962e+06	0.774	1.271	0.28	1.76	0.603	0.642	0.925	1.18	0.657	0.974	0.975	1.148	1.246	2.106	1.396	1.327	0.134072	cytoplasm	K07885			GO:0001775 cell activation; GO:0001906 cell killing; GO:0001909 leukocyte mediated cytotoxicity; GO:0001913 T cell mediated cytotoxicity; GO:0002228 natural killer cell mediated immunity; GO:0002250 adaptive immune response; GO:0002252 immune effector process; GO:0002263 cell activation involved in immune response; GO:0002274 myeloid leukocyte activation; GO:0002275 myeloid cell activation involv…	GO:0000323 lytic vacuole; GO:0001750 photoreceptor outer segment; GO:0005576 extracellular region; GO:0005622 intracellular; GO:0005623 cell; GO:0005737 cytoplasm; GO:0005764 lysosome; GO:0005768 endosome; GO:0005770 late endosome; GO:0005771 multivesicular body; GO:0005773 vacuole; GO:0005794 Golgi apparatus; GO:0005829 cytosol; GO:0005886 plasma membrane; GO:0005929 cilium; GO:0010008 endosome …	GO:0000166 nucleotide binding; GO:0001882 nucleoside binding; GO:0001883 purine nucleoside binding; GO:0003824 catalytic activity; GO:0003924 GTPase activity; GO:0005488 binding; GO:0005515 protein binding; GO:0005525 GTP binding; GO:0008092 cytoskeletal protein binding; GO:0016462 pyrophosphatase activity; GO:0016787 hydrolase activity; GO:0016817 hydrolase activity, acting on acid anhydrides; G…	PF00071	Ras family
Q9Y3P9	Rab GTPase-activating protein 1 OS=Homo sapiens OX=9606 GN=RABGAP1 PE=1 SV=3	RABGAP1	1	1	1	1	1	121.7				936400	399254			812116		24056.2		582438		922227																			cytoplasm	K20284			GO:0006810 transport; GO:0006886 intracellular protein transport; GO:0008104 protein localization; GO:0015031 protein transport; GO:0015833 peptide transport; GO:0031338 regulation of vesicle fusion; GO:0032879 regulation of localization; GO:0033036 macromolecule localization; GO:0033043 regulation of organelle organization; GO:0034613 cellular protein localization; GO:0042886 amide transport; GO…	GO:0005622 intracellular; GO:0005623 cell; GO:0005737 cytoplasm; GO:0005813 centrosome; GO:0005815 microtubule organizing center; GO:0005829 cytosol; GO:0005856 cytoskeleton; GO:0005875 microtubule associated complex; GO:0012505 endomembrane system; GO:0015630 microtubule cytoskeleton; GO:0032991 protein-containing complex; GO:0043226 organelle; GO:0043228 non-membrane-bounded organelle; GO:00432…	GO:0005096 GTPase activator activity; GO:0005488 binding; GO:0005515 protein binding; GO:0008047 enzyme activator activity; GO:0008092 cytoskeletal protein binding; GO:0015631 tubulin binding; GO:0017016 Ras GTPase binding; GO:0017137 Rab GTPase binding; GO:0019899 enzyme binding; GO:0030234 enzyme regulator activity; GO:0030695 GTPase regulator activity; GO:0031267 small GTPase binding; GO:00510…	PF00640	Phosphotyrosine interaction domain (PTB/PID)
Q96NR8	Retinol dehydrogenase 12 OS=Homo sapiens OX=9606 GN=RDH12 PE=1 SV=3	RDH12	20	5	15	4	5	35.1	14044538	1.49515e+06	1.14703e+06		205024	463975	8.67165e+06	2.22631e+07	4.5711e+06	2.07307e+07	968525	1.02583e+07	1.89351e+07	5.37324e+06	898877	1.521	0.501	0.539		0.026	0.076	1.387	3.169	1.062	2.446	0.151	0.835	1.473	0.607	0.146	2.352	0.115403	extracellular	K11153	RDH12; retinol dehydrogenase 12 [EC:1.1.1.300]	hsa01240 Biosynthesis of cofactors; hsa00830 Retinol metabolism; hsa01100 Metabolic pathways	GO:0001523 retinoid metabolic process; GO:0001894 tissue homeostasis; GO:0001895 retina homeostasis; GO:0003008 system process; GO:0006066 alcohol metabolic process; GO:0006629 lipid metabolic process; GO:0006720 isoprenoid metabolic process; GO:0006721 terpenoid metabolic process; GO:0007600 sensory perception; GO:0007601 visual perception; GO:0008152 metabolic process; GO:0009987 cellular proce…	GO:0001917 photoreceptor inner segment; GO:0005622 intracellular; GO:0005623 cell; GO:0005886 plasma membrane; GO:0016020 membrane; GO:0060342 photoreceptor inner segment membrane; GO:0071944 cell periphery; GO:0098590 plasma membrane region;	GO:0003824 catalytic activity; GO:0004033 aldo-keto reductase (NADP) activity; GO:0004745 retinol dehydrogenase activity; GO:0008106 alcohol dehydrogenase (NADP+) activity; GO:0016491 oxidoreductase activity; GO:0016614 oxidoreductase activity, acting on CH-OH group of donors; GO:0016616 oxidoreductase activity, acting on the CH-OH group of donors, NAD or NADP as acceptor; GO:0052650 NADP-retinol…	PF00106	short chain dehydrogenase
P20336	Ras-related protein Rab-3A OS=Homo sapiens OX=9606 GN=RAB3A PE=1 SV=1	RAB3A	20	4	24	1	1	25																																	cytoskeleton	K07882	RAB3A; Ras-related protein Rab-3A	hsa04721 Synaptic vesicle cycle; hsa04911 Insulin secretion	GO:0000902 cell morphogenesis; GO:0000904 cell morphogenesis involved in differentiation; GO:0001505 regulation of neurotransmitter levels; GO:0001775 cell activation; GO:0002252 immune effector process; GO:0002263 cell activation involved in immune response; GO:0002274 myeloid leukocyte activation; GO:0002275 myeloid cell activation involved in immune response; GO:0002283 neutrophil activation i…	GO:0001669 acrosomal vesicle; GO:0005622 intracellular; GO:0005623 cell; GO:0005737 cytoplasm; GO:0005768 endosome; GO:0005829 cytosol; GO:0005886 plasma membrane; GO:0008021 synaptic vesicle; GO:0012505 endomembrane system; GO:0012506 vesicle membrane; GO:0016020 membrane; GO:0030133 transport vesicle; GO:0030135 coated vesicle; GO:0030136 clathrin-coated vesicle; GO:0030141 secretory granule; G…	GO:0000166 nucleotide binding; GO:0001671 ATPase activator activity; GO:0001882 nucleoside binding; GO:0001883 purine nucleoside binding; GO:0003824 catalytic activity; GO:0003924 GTPase activity; GO:0005488 binding; GO:0005515 protein binding; GO:0005525 GTP binding; GO:0008022 protein C-terminus binding; GO:0008047 enzyme activator activity; GO:0008092 cytoskeletal protein binding; GO:0016462 p…	PF00071	Ras family
Q9HB40	Retinoid-inducible serine carboxypeptidase OS=Homo sapiens OX=9606 GN=SCPEP1 PE=1 SV=1	SCPEP1	10	4	25	4	4	50.8	1.98619e+06	355140	237425	516806	2.01285e+06	543904	636535	1.30877e+06	587114	2.38572e+06	1.32702e+06	1.94053e+06	2.8946e+06	2729280	1.94477e+06	1.185	0.655	0.615	0.56	1.419	0.489	0.561	1.026	0.751	1.55	1.136	0.87	1.24	1.698	1.742	1.432	0.098952	extracellular	K09646			GO:0001523 retinoid metabolic process; GO:0003008 system process; GO:0003013 circulatory system process; GO:0003018 vascular process in circulatory system; GO:0006082 organic acid metabolic process; GO:0006508 proteolysis; GO:0006629 lipid metabolic process; GO:0006720 isoprenoid metabolic process; GO:0006721 terpenoid metabolic process; GO:0006807 nitrogen compound metabolic process; GO:0008015 …	GO:0005622 intracellular; GO:0005623 cell; GO:0005737 cytoplasm; GO:0005829 cytosol;	GO:0003824 catalytic activity; GO:0004180 carboxypeptidase activity; GO:0004185 serine-type carboxypeptidase activity; GO:0008233 peptidase activity; GO:0008236 serine-type peptidase activity; GO:0008238 exopeptidase activity; GO:0016787 hydrolase activity; GO:0017171 serine hydrolase activity; GO:0070008 serine-type exopeptidase activity; GO:0070011 peptidase activity, acting on L-amino acid pep…	PF00450	Serine carboxypeptidase
Q9UNX3	60S ribosomal protein L26-like 1 OS=Homo sapiens OX=9606 GN=RPL26L1 PE=1 SV=1	RPL26L1	30	8	101	1	1	17.2								2.26559e+06		615003		1427855	1.29185e+06	567339																			nucleus	K02898	RP-L26e; large subunit ribosomal protein L26e	hsa03010 Ribosome; hsa05171 Coronavirus disease - COVID-19	GO:0002181 cytoplasmic translation; GO:0006412 translation; GO:0006518 peptide metabolic process; GO:0006807 nitrogen compound metabolic process; GO:0008152 metabolic process; GO:0009058 biosynthetic process; GO:0009059 macromolecule biosynthetic process; GO:0009987 cellular process; GO:0010467 gene expression; GO:0019538 protein metabolic process; GO:0022613 ribonucleoprotein complex biogenesis;…	GO:0005622 intracellular; GO:0005623 cell; GO:0005737 cytoplasm; GO:0005829 cytosol; GO:0005840 ribosome; GO:0015934 large ribosomal subunit; GO:0022625 cytosolic large ribosomal subunit; GO:0022626 cytosolic ribosome; GO:0032991 protein-containing complex; GO:0043226 organelle; GO:0043228 non-membrane-bounded organelle; GO:0043229 intracellular organelle; GO:0043232 intracellular non-membrane-bo…	GO:0003676 nucleic acid binding; GO:0003723 RNA binding; GO:0003735 structural constituent of ribosome; GO:0005198 structural molecule activity; GO:0005488 binding; GO:0097159 organic cyclic compound binding; GO:1901363 heterocyclic compound binding;
P62829	60S ribosomal protein L23 OS=Homo sapiens OX=9606 GN=RPL23 PE=1 SV=1	RPL23	55	7	183	7	7	14.9	4.47123e+07	1.15795e+07	1.78344e+06	1.60101e+07	3.29858e+07	2.38116e+07	3.99185e+07	5.66079e+07	3.14046e+07	7.00686e+07	2.5375e+07	9.4341e+07	5.63621e+07	4.7028e+07	3.11283e+07	0.979	0.784	0.17	0.637	0.854	0.786	1.291	1.629	1.474	1.671	0.798	1.552	0.886	1.074	1.024	1.805	0.0137299	cytoplasm	K02894	RP-L23e; large subunit ribosomal protein L23e	hsa03010 Ribosome; hsa05171 Coronavirus disease - COVID-19	GO:0000122 negative regulation of transcription by RNA polymerase II; GO:0000184 nuclear-transcribed mRNA catabolic process, nonsense-mediated decay; GO:0000956 nuclear-transcribed mRNA catabolic process; GO:0006139 nucleobase-containing compound metabolic process; GO:0006355 regulation of transcription, DNA-templated; GO:0006357 regulation of transcription by RNA polymerase II; GO:0006401 RNA ca…	GO:0005622 intracellular; GO:0005623 cell; GO:0005634 nucleus; GO:0005654 nucleoplasm; GO:0005730 nucleolus; GO:0005737 cytoplasm; GO:0005783 endoplasmic reticulum; GO:0005789 endoplasmic reticulum membrane; GO:0005791 rough endoplasmic reticulum; GO:0005829 cytosol; GO:0005840 ribosome; GO:0012505 endomembrane system; GO:0015934 large ribosomal subunit; GO:0016020 membrane; GO:0022625 cytosolic …	GO:0001221 transcription cofactor binding; GO:0001223 transcription coactivator binding; GO:0003676 nucleic acid binding; GO:0003723 RNA binding; GO:0003735 structural constituent of ribosome; GO:0004857 enzyme inhibitor activity; GO:0005198 structural molecule activity; GO:0005488 binding; GO:0005515 protein binding; GO:0008134 transcription factor binding; GO:0019843 rRNA binding; GO:0019899 en…	PF00238	Ribosomal protein L14p/L23e
Q96E11	Ribosome-recycling factor, mitochondrial OS=Homo sapiens OX=9606 GN=MRRF PE=1 SV=1	MRRF	9	2	12	2	2	29.3	2.31683e+06	327758	117604	718885	1.75648e+06	980122	1.2929e+06	2.56021e+06	1.02897e+06	2.59595e+06	1.72291e+06	3.74843e+06	1.89225e+06	1.72021e+06	1.87499e+06	1.2	0.525	0.264	0.677	1.075	0.765	0.989	1.742	1.143	1.464	1.281	1.459	0.704	0.929	1.459	1.653	0.0183676	cytoplasm	K02838			GO:0006412 translation; GO:0006415 translational termination; GO:0006518 peptide metabolic process; GO:0006807 nitrogen compound metabolic process; GO:0006996 organelle organization; GO:0008152 metabolic process; GO:0009058 biosynthetic process; GO:0009059 macromolecule biosynthetic process; GO:0009987 cellular process; GO:0010467 gene expression; GO:0016043 cellular component organization; GO:00…	GO:0005622 intracellular; GO:0005623 cell; GO:0005737 cytoplasm; GO:0005739 mitochondrion; GO:0005759 mitochondrial matrix; GO:0031974 membrane-enclosed lumen; GO:0043226 organelle; GO:0043227 membrane-bounded organelle; GO:0043229 intracellular organelle; GO:0043231 intracellular membrane-bounded organelle; GO:0043233 organelle lumen; GO:0070013 intracellular organelle lumen;	GO:0005488 binding; GO:0043021 ribonucleoprotein complex binding; GO:0043023 ribosomal large subunit binding; GO:0044877 protein-containing complex binding;	PF01765	Ribosome recycling factor
P53814	Smoothelin OS=Homo sapiens OX=9606 GN=SMTN PE=1 SV=7	SMTN	14	12	51	12	12	99	1.53429e+07	7.16543e+06	1.67462e+06	2.29656e+07	2.39856e+07	1.85329e+07	1.02284e+07	8.86024e+06	7.53719e+06	2.17591e+07	1.20377e+07	1.06623e+07	1.96116e+07	9.21921e+06	7.52723e+06	0.994	1.436	0.471	2.704	1.837	1.81	0.978	0.754	1.047	1.535	1.12	0.519	0.912	0.623	0.732	0.592	0.0926595	nucleus				GO:0003008 system process; GO:0003012 muscle system process; GO:0006936 muscle contraction; GO:0006939 smooth muscle contraction; GO:0007275 multicellular organism development; GO:0007517 muscle organ development; GO:0032501 multicellular organismal process; GO:0032502 developmental process; GO:0048513 animal organ development; GO:0048731 system development; GO:0048856 anatomical structure develo…	GO:0005622 intracellular; GO:0005623 cell; GO:0005856 cytoskeleton; GO:0015629 actin cytoskeleton; GO:0043226 organelle; GO:0043228 non-membrane-bounded organelle; GO:0043229 intracellular organelle; GO:0043232 intracellular non-membrane-bounded organelle;	GO:0003779 actin binding; GO:0005198 structural molecule activity; GO:0005488 binding; GO:0005515 protein binding; GO:0008092 cytoskeletal protein binding; GO:0008307 structural constituent of muscle;	PF00307	Calponin homology (CH) domain
P51531	Probable global transcription activator SNF2L2 OS=Homo sapiens OX=9606 GN=SMARCA2 PE=1 SV=2	SMARCA2	8	11	80	5	10	181.2	1.07895e+07	1.94673e+06	4.96585e+06	5.81026e+06	1.13963e+07	9.80327e+06	4.25164e+06	6.2071e+06	3.94031e+06	8.89286e+06	1.78171e+07	1.07022e+07	1.191e+07	1.24011e+07	1.01622e+07	1.052	0.587	2.102	1.029	1.313	1.441	0.612	0.795	0.824	0.944	2.493	0.784	0.834	1.261	1.488	0.889	0.54989	nucleus	K11647	SMARCA2_4; SWI/SNF-related matrix-associated actin-dependent regulator of chromatin subfamily A member 2/4 [EC:5.6.2.-]	hsa05225 Hepatocellular carcinoma; hsa04714 Thermogenesis	GO:0000122 negative regulation of transcription by RNA polymerase II; GO:0001558 regulation of cell growth; GO:0001944 vasculature development; GO:0006323 DNA packaging; GO:0006325 chromatin organization; GO:0006333 chromatin assembly or disassembly; GO:0006334 nucleosome assembly; GO:0006338 chromatin remodeling; GO:0006355 regulation of transcription, DNA-templated; GO:0006357 regulation of tra…	GO:0000228 nuclear chromosome; GO:0000785 chromatin; GO:0000790 nuclear chromatin; GO:0005622 intracellular; GO:0005623 cell; GO:0005634 nucleus; GO:0005654 nucleoplasm; GO:0005694 chromosome; GO:0005856 cytoskeleton; GO:0016514 SWI/SNF complex; GO:0031974 membrane-enclosed lumen; GO:0031981 nuclear lumen; GO:0032991 protein-containing complex; GO:0043226 organelle; GO:0043227 membrane-bounded or…	GO:0001067 regulatory region nucleic acid binding; GO:0003676 nucleic acid binding; GO:0003677 DNA binding; GO:0003682 chromatin binding; GO:0003712 transcription coregulator activity; GO:0003713 transcription coactivator activity; GO:0003824 catalytic activity; GO:0004386 helicase activity; GO:0005488 binding; GO:0008094 DNA-dependent ATPase activity; GO:0016462 pyrophosphatase activity; GO:0016…	PF08880; PF07529; PF07533; PF00439	QLQ; HSA; BRK domain; Bromodomain
Q8NBJ7	Inactive C-alpha-formylglycine-generating enzyme 2 OS=Homo sapiens OX=9606 GN=SUMF2 PE=1 SV=2	SUMF2	31	9	81	9	9	33.8	5.11167e+07	8.80851e+06	1.50558e+07	3.89331e+07	3.0684e+07	4.425e+07	1.24684e+07	2.53763e+07	2.05249e+07	1.62191e+07	3.00186e+07	1.45915e+07	2.00532e+07	1.73044e+07	3.49929e+07	1.716	0.915	2.194	2.375	1.217	2.24	0.618	1.119	1.477	0.593	1.447	0.368	0.483	0.606	1.764	0.53	0.0182137	extracellular					GO:0005622 intracellular; GO:0005623 cell; GO:0005737 cytoplasm; GO:0005783 endoplasmic reticulum; GO:0012505 endomembrane system; GO:0043226 organelle; GO:0043227 membrane-bounded organelle; GO:0043229 intracellular organelle; GO:0043231 intracellular membrane-bounded organelle;	GO:0005488 binding; GO:0005515 protein binding; GO:0042802 identical protein binding; GO:0042803 protein homodimerization activity; GO:0046983 protein dimerization activity;	PF03781	Formylglycine-generating sulfatase enzyme
Q9UH99	SUN domain-containing protein 2 OS=Homo sapiens OX=9606 GN=SUN2 PE=1 SV=3	SUN2	23	12	85	12	12	80.3	1.50498e+07	3.06358e+06	713012	7.53312e+06	1.41637e+07	7.46254e+06	7.56819e+06	9.27954e+06	4.17305e+06	9.54716e+06	6.10774e+06	1.80844e+07	2.07874e+07	1.03268e+07	5.21846e+06	1.382	0.87	0.284	1.257	1.537	1.033	1.026	1.12	0.821	0.955	0.805	1.248	1.371	0.989	0.72	0.949	0.823671	nucleus	K19347			GO:0000226 microtubule cytoskeleton organization; GO:0000278 mitotic cell cycle; GO:0006810 transport; GO:0006928 movement of cell or subcellular component; GO:0006996 organelle organization; GO:0006997 nucleus organization; GO:0006998 nuclear envelope organization; GO:0007010 cytoskeleton organization; GO:0007017 microtubule-based process; GO:0007018 microtubule-based movement; GO:0007049 cell c…	GO:0000228 nuclear chromosome; GO:0000781 chromosome, telomeric region; GO:0000784 nuclear chromosome, telomeric region; GO:0000793 condensed chromosome; GO:0000794 condensed nuclear chromosome; GO:0005622 intracellular; GO:0005623 cell; GO:0005634 nucleus; GO:0005635 nuclear envelope; GO:0005637 nuclear inner membrane; GO:0005694 chromosome; GO:0012505 endomembrane system; GO:0016020 membrane; G…	GO:0005488 binding; GO:0005515 protein binding; GO:0005521 lamin binding; GO:0008017 microtubule binding; GO:0008092 cytoskeletal protein binding; GO:0015631 tubulin binding; GO:0042802 identical protein binding; GO:0043495 protein-membrane adaptor activity;
Q9P2R7	Succinate--CoA ligase [ADP-forming] subunit beta, mitochondrial OS=Homo sapiens OX=9606 GN=SUCLA2 PE=1 SV=3	SUCLA2	14	7	37	7	7	50.3	4.7002e+06	1.14513e+06	343891	4.76279e+06	3.63934e+06	4.02637e+06	1.47655e+06	1.0687e+06	670708	1.60025e+06	1.37804e+06	8.82868e+06	5.09423e+06	4.64575e+06	2.34929e+06	1.313	0.989	0.417	2.417	1.201	1.695	0.609	0.392	0.402	0.487	0.552	1.852	1.022	1.353	0.985	0.635	0.144711	mitochondria	K01900	LSC2; succinyl-CoA synthetase beta subunit [EC:6.2.1.4 6.2.1.5]	hsa00640 Propanoate metabolism; hsa01200 Carbon metabolism; hsa00020 Citrate cycle (TCA cycle); hsa01100 Metabolic pathways	GO:0006082 organic acid metabolic process; GO:0006091 generation of precursor metabolites and energy; GO:0006099 tricarboxylic acid cycle; GO:0006101 citrate metabolic process; GO:0006104 succinyl-CoA metabolic process; GO:0006105 succinate metabolic process; GO:0006139 nucleobase-containing compound metabolic process; GO:0006163 purine nucleotide metabolic process; GO:0006637 acyl-CoA metabolic …	GO:0005622 intracellular; GO:0005623 cell; GO:0005737 cytoplasm; GO:0005739 mitochondrion; GO:0005759 mitochondrial matrix; GO:0031974 membrane-enclosed lumen; GO:0043209 myelin sheath; GO:0043226 organelle; GO:0043227 membrane-bounded organelle; GO:0043229 intracellular organelle; GO:0043231 intracellular membrane-bounded organelle; GO:0043233 organelle lumen; GO:0070013 intracellular organelle …	GO:0003824 catalytic activity; GO:0004774 succinate-CoA ligase activity; GO:0004775 succinate-CoA ligase (ADP-forming) activity; GO:0016874 ligase activity; GO:0016877 ligase activity, forming carbon-sulfur bonds; GO:0016878 acid-thiol ligase activity;	PF08442; PF00549	ATP-grasp domain; CoA-ligase
Q9UGT4	Sushi domain-containing protein 2 OS=Homo sapiens OX=9606 GN=SUSD2 PE=1 SV=1	SUSD2	1	1	13	1	1	90.2	339055			561394	483299	452181				383092	141322	256306	138463	220610	131176																		extracellular	K23820			GO:0010564 regulation of cell cycle process; GO:0010948 negative regulation of cell cycle process; GO:0045786 negative regulation of cell cycle; GO:0048519 negative regulation of biological process; GO:0048523 negative regulation of cellular process; GO:0050789 regulation of biological process; GO:0050794 regulation of cellular process; GO:0051302 regulation of cell division; GO:0051726 regulatio…	GO:0005623 cell; GO:0005886 plasma membrane; GO:0016020 membrane; GO:0071944 cell periphery;		PF03782; PF00084	AMOP domain; Sushi domain (SCR repeat)
P11277	Spectrin beta chain, erythrocytic OS=Homo sapiens OX=9606 GN=SPTB PE=1 SV=5	SPTB	47	81	546	75	76	246.3	5.33734e+07	1.70726e+08	3.97242e+08	8.6826e+07	9.88978e+07	1.04314e+08	9.14857e+07	3.58298e+07	3.96383e+07	6.37364e+07	6.13181e+07	1.05652e+08	1.38705e+08	1.99877e+08	1.27221e+08	0.384	3.8	12.408	1.135	0.841	1.132	0.972	0.339	0.611	0.499	0.633	0.571	0.717	1.5	1.375	0.244	0.0912638	nucleus	K06115			GO:0000165 MAPK cascade; GO:0000902 cell morphogenesis; GO:0000904 cell morphogenesis involved in differentiation; GO:0002376 immune system process; GO:0002520 immune system development; GO:0006464 cellular protein modification process; GO:0006468 protein phosphorylation; GO:0006725 cellular aromatic compound metabolic process; GO:0006778 porphyrin-containing compound metabolic process; GO:000677…	GO:0005622 intracellular; GO:0005623 cell; GO:0005737 cytoplasm; GO:0005794 Golgi apparatus; GO:0005829 cytosol; GO:0005856 cytoskeleton; GO:0005886 plasma membrane; GO:0005938 cell cortex; GO:0008091 spectrin; GO:0009898 cytoplasmic side of plasma membrane; GO:0009986 cell surface; GO:0012505 endomembrane system; GO:0014731 spectrin-associated cytoskeleton; GO:0015629 actin cytoskeleton; GO:0016…	GO:0003779 actin binding; GO:0005085 guanyl-nucleotide exchange factor activity; GO:0005088 Ras guanyl-nucleotide exchange factor activity; GO:0005488 binding; GO:0005515 protein binding; GO:0008092 cytoskeletal protein binding; GO:0017016 Ras GTPase binding; GO:0019899 enzyme binding; GO:0030506 ankyrin binding; GO:0031267 small GTPase binding; GO:0044877 protein-containing complex binding; GO:0…	PF00307; PF00435	Calponin homology (CH) domain; Spectrin repeat
Q96SB4	SRSF protein kinase 1 OS=Homo sapiens OX=9606 GN=SRPK1 PE=1 SV=2	SRPK1	5	2	3	1	1	74.3																																	nucleus	K15409	SRPK1; serine/threonine-protein kinase SRPK1 [EC:2.7.11.1]	hsa05168 Herpes simplex virus 1 infection	GO:0000003 reproduction; GO:0000245 spliceosomal complex assembly; GO:0000375 RNA splicing, via transesterification reactions; GO:0000377 RNA splicing, via transesterification reactions with bulged adenosine as nucleophile; GO:0000398 mRNA splicing, via spliceosome; GO:0002376 immune system process; GO:0003006 developmental process involved in reproduction; GO:0006139 nucleobase-containing compou…	GO:0005622 intracellular; GO:0005623 cell; GO:0005634 nucleus; GO:0005737 cytoplasm; GO:0005829 cytosol; GO:0005886 plasma membrane; GO:0016020 membrane; GO:0016363 nuclear matrix; GO:0031974 membrane-enclosed lumen; GO:0031981 nuclear lumen; GO:0034399 nuclear periphery; GO:0043226 organelle; GO:0043227 membrane-bounded organelle; GO:0043229 intracellular organelle; GO:0043231 intracellular memb…	GO:0000166 nucleotide binding; GO:0000287 magnesium ion binding; GO:0003824 catalytic activity; GO:0004672 protein kinase activity; GO:0004674 protein serine/threonine kinase activity; GO:0005488 binding; GO:0005524 ATP binding; GO:0008144 drug binding; GO:0016301 kinase activity; GO:0016740 transferase activity; GO:0016772 transferase activity, transferring phosphorus-containing groups; GO:00167…	PF00069	Protein kinase domain
Q9BX66	Sorbin and SH3 domain-containing protein 1 OS=Homo sapiens OX=9606 GN=SORBS1 PE=1 SV=3	SORBS1	13	13	56	13	13	142.4	2.61122e+07	4.01056e+07	1.61213e+07	37108130	2.80661e+07	3.67338e+07	2.55696e+07	2.21359e+07	2.14753e+07	1.69374e+07	2.23515e+07	1.89181e+07	1.88341e+07	1.93371e+07	2.51762e+07	0.889	4.225	2.383	2.297	1.13	1.886	1.286	0.991	1.568	0.628	1.093	0.484	0.461	0.687	1.288	0.442	0.0110006	nucleus	K06086	SORBS1; sorbin and SH3 domain containing protein 1	hsa04520 Adherens junction; hsa03320 PPAR signaling pathway; hsa04910 Insulin signaling pathway	GO:0003008 system process; GO:0003012 muscle system process; GO:0005979 regulation of glycogen biosynthetic process; GO:0006109 regulation of carbohydrate metabolic process; GO:0006936 muscle contraction; GO:0006950 response to stress; GO:0006996 organelle organization; GO:0007010 cytoskeleton organization; GO:0007015 actin filament organization; GO:0007044 cell-substrate junction assembly; GO:00…	GO:0001725 stress fiber; GO:0005622 intracellular; GO:0005623 cell; GO:0005634 nucleus; GO:0005737 cytoplasm; GO:0005813 centrosome; GO:0005815 microtubule organizing center; GO:0005829 cytosol; GO:0005856 cytoskeleton; GO:0005886 plasma membrane; GO:0005887 integral component of plasma membrane; GO:0005899 insulin receptor complex; GO:0005911 cell-cell junction; GO:0005912 adherens junction; GO:…	GO:0003779 actin binding; GO:0005102 signaling receptor binding; GO:0005158 insulin receptor binding; GO:0005488 binding; GO:0005515 protein binding; GO:0008092 cytoskeletal protein binding; GO:0008134 transcription factor binding; GO:0019899 enzyme binding; GO:0019900 kinase binding; GO:0019901 protein kinase binding; GO:0030674 protein-macromolecule adaptor activity; GO:0031625 ubiquitin protei…	PF07653; PF00018	Variant SH3 domain; SH3 domain
Q9NZD8	Maspardin OS=Homo sapiens OX=9606 GN=SPG21 PE=1 SV=1	SPG21	10	3	8	3	3	34.9	3553110	325111	1.67141e+06	79399.7		76685.6	108309	56036.1	274164	837476	655230	3.38394e+06	1.23633e+06	1.5062e+06	1.36318e+06	2.8	0.792	5.717	0.114		0.091	0.126	0.058	0.463	0.719	0.741	2.003	0.7	1.238	1.613	0.447	0.824174	cytoplasm	K19367	SPG21; maspardin	hsa04144 Endocytosis	GO:0002253 activation of immune response; GO:0002376 immune system process; GO:0002429 immune response-activating cell surface receptor signaling pathway; GO:0002682 regulation of immune system process; GO:0002684 positive regulation of immune system process; GO:0002757 immune response-activating signal transduction; GO:0002764 immune response-regulating signaling pathway; GO:0002768 immune respo…	GO:0005622 intracellular; GO:0005623 cell; GO:0005737 cytoplasm; GO:0005798 Golgi-associated vesicle; GO:0005829 cytosol; GO:0012505 endomembrane system; GO:0030133 transport vesicle; GO:0030135 coated vesicle; GO:0030136 clathrin-coated vesicle; GO:0030140 trans-Golgi network transport vesicle; GO:0031410 cytoplasmic vesicle; GO:0031982 vesicle; GO:0043226 organelle; GO:0043227 membrane-bounded …	GO:0005102 signaling receptor binding; GO:0005488 binding; GO:0005515 protein binding; GO:0042609 CD4 receptor binding;	PF00561	alpha/beta hydrolase fold
Q9NUQ6	SPATS2-like protein OS=Homo sapiens OX=9606 GN=SPATS2L PE=1 SV=2	SPATS2L	11	5	6	5	5	61.7	4.1536e+06	821640	5.63571e+06	2.79973e+06	697389	4.82519e+06	5.23803e+06	2.4259e+06	81975.2	316061	4.54608e+06	3.69371e+06	4.00097e+06	2.42773e+06	6.48541e+06	1.102	0.674	6.489	1.349	0.219	1.93	2.051	0.845	0.047	0.091	1.731	0.736	0.762	0.671	2.583	0.539	0.349437	nucleus					GO:0005622 intracellular; GO:0005623 cell; GO:0005634 nucleus; GO:0005730 nucleolus; GO:0005737 cytoplasm; GO:0005829 cytosol; GO:0031974 membrane-enclosed lumen; GO:0031981 nuclear lumen; GO:0032991 protein-containing complex; GO:0043226 organelle; GO:0043227 membrane-bounded organelle; GO:0043228 non-membrane-bounded organelle; GO:0043229 intracellular organelle; GO:0043231 intracellular membra…
Q14247	Src substrate cortactin OS=Homo sapiens OX=9606 GN=CTTN PE=1 SV=2	CTTN	44	22	184	22	22	61.5	5.24878e+07	8.3911e+07	2.04438e+07	1.40454e+07	3.06454e+07	1.7883e+07	3.55833e+07	3.8295e+07	1.80607e+07	5.5277e+07	4.90036e+07	6.72958e+07	6.49726e+07	4.63415e+07	2.33651e+07	1.085	5.367	1.835	0.528	0.749	0.558	1.086	1.04	0.801	1.245	1.455	1.045	0.965	0.999	0.726	0.617	0.750865	cytoplasm	K06106	CTTN; cortactin	hsa05100 Bacterial invasion of epithelial cells; hsa05130 Pathogenic Escherichia coli infection; hsa05205 Proteoglycans in cancer; hsa04530 Tight junction; hsa05131 Shigellosis	GO:0000902 cell morphogenesis; GO:0001558 regulation of cell growth; GO:0006810 transport; GO:0006886 intracellular protein transport; GO:0006897 endocytosis; GO:0006898 receptor-mediated endocytosis; GO:0006928 movement of cell or subcellular component; GO:0006929 substrate-dependent cell migration; GO:0006930 substrate-dependent cell migration, cell extension; GO:0006937 regulation of muscle co…	GO:0001726 ruffle; GO:0002102 podosome; GO:0005622 intracellular; GO:0005623 cell; GO:0005737 cytoplasm; GO:0005794 Golgi apparatus; GO:0005819 spindle; GO:0005829 cytosol; GO:0005856 cytoskeleton; GO:0005886 plasma membrane; GO:0005905 clathrin-coated pit; GO:0005938 cell cortex; GO:0012505 endomembrane system; GO:0015629 actin cytoskeleton; GO:0015630 microtubule cytoskeleton; GO:0016020 membra…	GO:0005488 binding; GO:0005515 protein binding; GO:0005522 profilin binding; GO:0044877 protein-containing complex binding; GO:0070064 proline-rich region binding; GO:0071933 Arp2/3 complex binding;
Q9Y3C8	Ubiquitin-fold modifier-conjugating enzyme 1 OS=Homo sapiens OX=9606 GN=UFC1 PE=1 SV=3	UFC1	19	3	37	3	3	19.4	5.67257e+06	374086	393213	2.15285e+06	7.85271e+06	4.07204e+06	2.41513e+06	2.99979e+06	1.57377e+06	2.6075e+06	4.2982e+06	9.54939e+06	7.00538e+06	9.98469e+06	7.3455e+06	1.061	0.216	0.319	0.732	1.735	1.148	0.667	0.737	0.631	0.531	1.154	1.342	0.941	1.947	2.063	1.281	0.287865	cytoplasm	K12165			GO:0006464 cellular protein modification process; GO:0006807 nitrogen compound metabolic process; GO:0006950 response to stress; GO:0008152 metabolic process; GO:0009987 cellular process; GO:0019538 protein metabolic process; GO:0032446 protein modification by small protein conjugation; GO:0033554 cellular response to stress; GO:0034976 response to endoplasmic reticulum stress; GO:0036211 protein…	GO:0005622 intracellular; GO:0005623 cell; GO:0005737 cytoplasm;	GO:0003824 catalytic activity; GO:0016740 transferase activity; GO:0019787 ubiquitin-like protein transferase activity; GO:0071568 UFM1 transferase activity; GO:0140096 catalytic activity, acting on a protein;	PF08694	Ubiquitin-fold modifier-conjugating enzyme 1
Q9Y285	Phenylalanine--tRNA ligase alpha subunit OS=Homo sapiens OX=9606 GN=FARSA PE=1 SV=3	FARSA	30	13	94	13	13	57.5	1.06195e+07	2.35294e+06	1.05549e+06	4.88319e+06	7.31171e+06	4.21312e+06	7.1983e+06	7.18516e+06	4.75815e+06	1.19268e+07	5.73894e+06	2.08072e+07	1.62068e+07	1.3562e+07	8.71186e+06	1.072	0.735	0.462	0.896	0.872	0.641	1.073	0.953	1.03	1.311	0.831	1.578	1.175	1.427	1.32	1.525	0.0048333	nucleus	K01889	FARSA; phenylalanyl-tRNA synthetase alpha chain [EC:6.1.1.20]	hsa00970 Aminoacyl-tRNA biosynthesis	GO:0006082 organic acid metabolic process; GO:0006139 nucleobase-containing compound metabolic process; GO:0006399 tRNA metabolic process; GO:0006412 translation; GO:0006418 tRNA aminoacylation for protein translation; GO:0006432 phenylalanyl-tRNA aminoacylation; GO:0006518 peptide metabolic process; GO:0006520 cellular amino acid metabolic process; GO:0006725 cellular aromatic compound metabolic…	GO:0005622 intracellular; GO:0005623 cell; GO:0005737 cytoplasm; GO:0005829 cytosol; GO:0009328 phenylalanine-tRNA ligase complex; GO:0032991 protein-containing complex; GO:1902494 catalytic complex;	GO:0003824 catalytic activity; GO:0004812 aminoacyl-tRNA ligase activity; GO:0004826 phenylalanine-tRNA ligase activity; GO:0016874 ligase activity; GO:0016875 ligase activity, forming carbon-oxygen bonds; GO:0140098 catalytic activity, acting on RNA; GO:0140101 catalytic activity, acting on a tRNA;	PF01409	tRNA synthetases class II core domain (F)
Q9P2J5	Leucine--tRNA ligase, cytoplasmic OS=Homo sapiens OX=9606 GN=LARS1 PE=1 SV=2	LARS1	23	22	124	22	22	134.4	1.98207e+07	1.31988e+07	1.1165e+07	9.82502e+06	1.56088e+07	1.21621e+07	1.60556e+07	1.59247e+07	1.80493e+07	1.9672e+07	1.61634e+07	3.9474e+07	3.76458e+07	2.24557e+07	1.57327e+07	0.895	1.843	2.188	0.806	0.833	0.828	1.07	0.944	1.746	0.967	1.047	1.339	1.22	1.057	1.066	0.943	0.925133	nucleus	K01869	LARS; leucyl-tRNA synthetase [EC:6.1.1.4]	hsa00970 Aminoacyl-tRNA biosynthesis	GO:0001101 response to acid chemical; GO:0006082 organic acid metabolic process; GO:0006139 nucleobase-containing compound metabolic process; GO:0006399 tRNA metabolic process; GO:0006412 translation; GO:0006418 tRNA aminoacylation for protein translation; GO:0006425 glutaminyl-tRNA aminoacylation; GO:0006429 leucyl-tRNA aminoacylation; GO:0006438 valyl-tRNA aminoacylation; GO:0006518 peptide met…	GO:0000323 lytic vacuole; GO:0005622 intracellular; GO:0005623 cell; GO:0005634 nucleus; GO:0005654 nucleoplasm; GO:0005737 cytoplasm; GO:0005764 lysosome; GO:0005773 vacuole; GO:0005783 endoplasmic reticulum; GO:0005829 cytosol; GO:0012505 endomembrane system; GO:0016604 nuclear body; GO:0017101 aminoacyl-tRNA synthetase multienzyme complex; GO:0031974 membrane-enclosed lumen; GO:0031981 nuclear…	GO:0003824 catalytic activity; GO:0004812 aminoacyl-tRNA ligase activity; GO:0004819 glutamine-tRNA ligase activity; GO:0004823 leucine-tRNA ligase activity; GO:0004832 valine-tRNA ligase activity; GO:0005096 GTPase activator activity; GO:0008047 enzyme activator activity; GO:0016874 ligase activity; GO:0016875 ligase activity, forming carbon-oxygen bonds; GO:0030234 enzyme regulator activity; GO…	PF08264	Anticodon-binding domain of tRNA
Q9Y228	TRAF3-interacting JNK-activating modulator OS=Homo sapiens OX=9606 GN=TRAF3IP3 PE=1 SV=2	TRAF3IP3	3	2	6	2	2	63.6	1.42919e+06										1.43385e+06	1.02518e+06	768398	1137616	638047	1.135										1.635	0.612	0.438	0.942	0.761	0.773		peroxisome
P47897	Glutamine--tRNA ligase OS=Homo sapiens OX=9606 GN=QARS1 PE=1 SV=1	QARS1	42	28	311	27	27	87.7	4.30474e+07	1.33052e+07	6.88764e+06	1.70364e+07	2.63522e+07	1.93092e+07	3.79095e+07	3.0305e+07	2.29909e+07	5.12225e+07	2.6026e+07	9.73031e+07	6.3385e+07	3.38697e+07	2.1306e+07	1.077	1.03	0.748	0.775	0.779	0.729	1.401	0.997	1.234	1.396	0.935	1.83	1.139	0.884	0.801	1.378	0.0293637	cytoplasm	K01886	QARS; glutaminyl-tRNA synthetase [EC:6.1.1.18]	hsa00970 Aminoacyl-tRNA biosynthesis; hsa01100 Metabolic pathways	GO:0001932 regulation of protein phosphorylation; GO:0001933 negative regulation of protein phosphorylation; GO:0006082 organic acid metabolic process; GO:0006139 nucleobase-containing compound metabolic process; GO:0006355 regulation of transcription, DNA-templated; GO:0006399 tRNA metabolic process; GO:0006412 translation; GO:0006418 tRNA aminoacylation for protein translation; GO:0006425 gluta…	GO:0005622 intracellular; GO:0005623 cell; GO:0005737 cytoplasm; GO:0005739 mitochondrion; GO:0005759 mitochondrial matrix; GO:0005829 cytosol; GO:0017101 aminoacyl-tRNA synthetase multienzyme complex; GO:0031974 membrane-enclosed lumen; GO:0032991 protein-containing complex; GO:0043226 organelle; GO:0043227 membrane-bounded organelle; GO:0043229 intracellular organelle; GO:0043231 intracellular …	GO:0003824 catalytic activity; GO:0004812 aminoacyl-tRNA ligase activity; GO:0004819 glutamine-tRNA ligase activity; GO:0004857 enzyme inhibitor activity; GO:0004860 protein kinase inhibitor activity; GO:0005488 binding; GO:0005515 protein binding; GO:0016874 ligase activity; GO:0016875 ligase activity, forming carbon-oxygen bonds; GO:0019207 kinase regulator activity; GO:0019210 kinase inhibitor…	PF00749; PF03950	tRNA synthetases class I (E and Q), catalytic domain; tRNA synthetases class I (E and Q), anti-codon binding domain
P26640	Valine--tRNA ligase OS=Homo sapiens OX=9606 GN=VARS1 PE=1 SV=4	VARS1	28	31	233	31	31	140.4	5.93977e+07	9.06227e+06	5.9612e+06	13936080	4.0011e+07	2.64985e+07	2.91501e+07	2.84829e+07	1.27633e+07	5.21105e+07	2.91182e+07	8.6554e+07	7.18667e+07	5.22006e+07	3.0236e+07	1.386	0.654	0.604	0.591	1.103	0.932	1.004	0.873	0.638	1.324	0.975	1.517	1.204	1.27	1.059	1.248	0.14089	cytoplasm	K01873	VARS; valyl-tRNA synthetase [EC:6.1.1.9]	hsa00970 Aminoacyl-tRNA biosynthesis	GO:0006082 organic acid metabolic process; GO:0006139 nucleobase-containing compound metabolic process; GO:0006399 tRNA metabolic process; GO:0006412 translation; GO:0006418 tRNA aminoacylation for protein translation; GO:0006438 valyl-tRNA aminoacylation; GO:0006518 peptide metabolic process; GO:0006520 cellular amino acid metabolic process; GO:0006725 cellular aromatic compound metabolic proces…	GO:0005622 intracellular; GO:0005623 cell; GO:0005737 cytoplasm; GO:0005829 cytosol;	GO:0003824 catalytic activity; GO:0004812 aminoacyl-tRNA ligase activity; GO:0004832 valine-tRNA ligase activity; GO:0016874 ligase activity; GO:0016875 ligase activity, forming carbon-oxygen bonds; GO:0140098 catalytic activity, acting on RNA; GO:0140101 catalytic activity, acting on a tRNA;	PF00043; PF08264	Glutathione S-transferase, C-terminal domain; Anticodon-binding domain of tRNA
Q01085	Nucleolysin TIAR OS=Homo sapiens OX=9606 GN=TIAL1 PE=1 SV=1	TIAL1	18	6	32	4	6	41.6	5.9549e+06	1.27072e+06	2.30757e+06	2.25146e+06	4.70167e+06	3.49738e+06	3.11312e+06	4.70473e+06	1.71777e+06	4.50178e+06	1.64686e+06	5.97227e+06	9.15295e+06	8.92907e+06	5.18856e+06	1.172	0.773	1.971	0.805	1.093	1.037	0.904	1.216	0.725	0.965	0.465	0.883	1.293	1.832	1.533	0.955	0.750221	nucleus	K13201			GO:0000003 reproduction; GO:0003006 developmental process involved in reproduction; GO:0006355 regulation of transcription, DNA-templated; GO:0006357 regulation of transcription by RNA polymerase II; GO:0006915 apoptotic process; GO:0006950 response to stress; GO:0006952 defense response; GO:0007154 cell communication; GO:0007165 signal transduction; GO:0007166 cell surface receptor signaling pat…	GO:0000323 lytic vacuole; GO:0005622 intracellular; GO:0005623 cell; GO:0005634 nucleus; GO:0005654 nucleoplasm; GO:0005737 cytoplasm; GO:0005764 lysosome; GO:0005773 vacuole; GO:0010494 cytoplasmic stress granule; GO:0031974 membrane-enclosed lumen; GO:0031981 nuclear lumen; GO:0032991 protein-containing complex; GO:0035770 ribonucleoprotein granule; GO:0036464 cytoplasmic ribonucleoprotein gran…	GO:0003676 nucleic acid binding; GO:0003723 RNA binding; GO:0005488 binding; GO:0017091 AU-rich element binding; GO:0097159 organic cyclic compound binding; GO:1901363 heterocyclic compound binding;	PF00076	RNA recognition motif. (a.k.a. RRM, RBD, or RNP domain)
P49368	T-complex protein 1 subunit gamma OS=Homo sapiens OX=9606 GN=CCT3 PE=1 SV=4	CCT3	47	26	344	26	26	60.5	2.14442e+08	1.60302e+08	7.27056e+07	1.683e+08	4.4033e+08	2.18608e+08	2.33327e+08	2.30587e+08	1.84743e+08	1.67615e+08	2.42702e+08	2.68865e+08	2.51995e+08	2.28322e+08	1.6335e+08	0.844	1.951	1.242	1.203	2.047	1.297	1.355	1.192	1.558	0.718	1.371	0.795	0.712	0.937	0.965	0.746	0.102807	mitochondria	K09495			GO:0006457 protein folding; GO:0006458 'de novo' protein folding; GO:0009889 regulation of biosynthetic process; GO:0009891 positive regulation of biosynthetic process; GO:0009893 positive regulation of metabolic process; GO:0009987 cellular process; GO:0010556 regulation of macromolecule biosynthetic process; GO:0010557 positive regulation of macromolecule biosynthetic process; GO:0010604 positi…	GO:0005622 intracellular; GO:0005623 cell; GO:0005737 cytoplasm; GO:0005829 cytosol; GO:0005832 chaperonin-containing T-complex; GO:0005856 cytoskeleton; GO:0005874 microtubule; GO:0005886 plasma membrane; GO:0015630 microtubule cytoskeleton; GO:0016020 membrane; GO:0032991 protein-containing complex; GO:0043226 organelle; GO:0043228 non-membrane-bounded organelle; GO:0043229 intracellular organe…	GO:0005488 binding; GO:0005515 protein binding; GO:0051082 unfolded protein binding;
Q9BV44	THUMP domain-containing protein 3 OS=Homo sapiens OX=9606 GN=THUMPD3 PE=1 SV=1	THUMPD3	4	2	2	2	2	57	587051											1.05506e+06	566763	377410		0.773											1.044	0.536	0.518		0.905		cytoplasm				GO:0001510 RNA methylation; GO:0006139 nucleobase-containing compound metabolic process; GO:0006396 RNA processing; GO:0006399 tRNA metabolic process; GO:0006400 tRNA modification; GO:0006725 cellular aromatic compound metabolic process; GO:0006807 nitrogen compound metabolic process; GO:0008033 tRNA processing; GO:0008152 metabolic process; GO:0009451 RNA modification; GO:0009987 cellular proces…	GO:0005622 intracellular; GO:0005623 cell; GO:0005634 nucleus; GO:0005730 nucleolus; GO:0005737 cytoplasm; GO:0005829 cytosol; GO:0031974 membrane-enclosed lumen; GO:0031981 nuclear lumen; GO:0043226 organelle; GO:0043227 membrane-bounded organelle; GO:0043228 non-membrane-bounded organelle; GO:0043229 intracellular organelle; GO:0043231 intracellular membrane-bounded organelle; GO:0043232 intrac…	GO:0003824 catalytic activity; GO:0008168 methyltransferase activity; GO:0008173 RNA methyltransferase activity; GO:0008175 tRNA methyltransferase activity; GO:0008757 S-adenosylmethionine-dependent methyltransferase activity; GO:0016423 tRNA (guanine) methyltransferase activity; GO:0016740 transferase activity; GO:0016741 transferase activity, transferring one-carbon groups; GO:0140098 catalytic…	PF02926; PF01170	THUMP domain; Putative RNA methylase family UPF0020
Q92526	T-complex protein 1 subunit zeta-2 OS=Homo sapiens OX=9606 GN=CCT6B PE=1 SV=5	CCT6B	10	5	63	1	1	57.8	3.60236e+06	2.36256e+06		2.86934e+06	2.12091e+06	3.39815e+06	3.59381e+06	4.13435e+06	325015	4977842	3.83752e+06	8505159	6.39535e+06	6.26255e+06	3.67069e+06																		cytoplasm	K09498			GO:0000003 reproduction; GO:0006457 protein folding; GO:0006458 'de novo' protein folding; GO:0006810 transport; GO:0007276 gamete generation; GO:0007283 spermatogenesis; GO:0008104 protein localization; GO:0009987 cellular process; GO:0015031 protein transport; GO:0015833 peptide transport; GO:0016043 cellular component organization; GO:0019953 sexual reproduction; GO:0022414 reproductive proces…	GO:0005622 intracellular; GO:0005623 cell; GO:0005737 cytoplasm; GO:0005829 cytosol; GO:0005832 chaperonin-containing T-complex; GO:0032991 protein-containing complex; GO:0101031 chaperone complex;	GO:0005215 transporter activity; GO:0005488 binding; GO:0005515 protein binding; GO:0044183 protein folding chaperone; GO:0051082 unfolded protein binding;
Q00403	Transcription initiation factor IIB OS=Homo sapiens OX=9606 GN=GTF2B PE=1 SV=1	GTF2B	13	3	8	3	3	34.8	699393	122722	639782	538529	1.09728e+06	594523	142775	556502		665153	173305	1.37183e+06	1.47659e+06	1.67252e+06	840682	0.787	0.427	3.126	1.101	1.459	1.009	0.237	0.823		0.815	0.28	1.16	1.193	1.963	1.421	0.748	0.441776	nucleus	K03124	TFIIB; transcription initiation factor TFIIB	hsa03022 Basal transcription factors; hsa05017 Spinocerebellar ataxia; hsa05203 Viral carcinogenesis	GO:0001173 DNA-templated transcriptional start site selection; GO:0001174 transcriptional start site selection at RNA polymerase II promoter; GO:0006139 nucleobase-containing compound metabolic process; GO:0006351 transcription, DNA-templated; GO:0006352 DNA-templated transcription, initiation; GO:0006355 regulation of transcription, DNA-templated; GO:0006357 regulation of transcription by RNA po…	GO:0000428 DNA-directed RNA polymerase complex; GO:0005622 intracellular; GO:0005623 cell; GO:0005634 nucleus; GO:0005654 nucleoplasm; GO:0005667 transcription regulator complex; GO:0005669 transcription factor TFIID complex; GO:0005694 chromosome; GO:0016591 RNA polymerase II, holoenzyme; GO:0016604 nuclear body; GO:0030880 RNA polymerase complex; GO:0031974 membrane-enclosed lumen; GO:0031981 n…	GO:0000976 transcription regulatory region sequence-specific DNA binding; GO:0000977 RNA polymerase II transcription regulatory region sequence-specific DNA binding; GO:0000979 RNA polymerase II core promoter sequence-specific DNA binding; GO:0000993 RNA polymerase II complex binding; GO:0001046 core promoter sequence-specific DNA binding; GO:0001067 regulatory region nucleic acid binding; GO:000…	PF08271; PF00382	TFIIB zinc-binding; Transcription factor TFIIB repeat
Q8WUY1	Protein THEM6 OS=Homo sapiens OX=9606 GN=THEM6 PE=1 SV=2	THEM6	12	2	5	2	2	23.9	887467	723075	138941		629938	628482	1.25894e+06	1.70413e+06	932218	515549	954341	1.38203e+06	1.64006e+06	471000	284901	0.871	2.194	0.592		0.73	0.93	1.823	2.196	1.96	0.551	1.344	1.019	1.155	0.482	0.42	1.144	0.791427	extracellular							PF13279	Thioesterase-like superfamily
Q5TEJ8	Protein THEMIS2 OS=Homo sapiens OX=9606 GN=THEMIS2 PE=1 SV=1	THEMIS2	10	5	21	5	5	72	3.83353e+06	49850.9		472042	385711	296648	184798	238006	192349	898894	803158	639523	1.24547e+06	1.56271e+06	463980	4.055	0.163		0.908	0.482	0.473	0.289	0.331	0.436	1.036	1.22	0.508	0.946	1.724	0.737	0.66	0.9735	cytoplasm,nucleus				GO:0002253 activation of immune response; GO:0002376 immune system process; GO:0002429 immune response-activating cell surface receptor signaling pathway; GO:0002682 regulation of immune system process; GO:0002684 positive regulation of immune system process; GO:0002757 immune response-activating signal transduction; GO:0002764 immune response-regulating signaling pathway; GO:0002768 immune respo…	GO:0005622 intracellular; GO:0005623 cell; GO:0005634 nucleus; GO:0005737 cytoplasm; GO:0043226 organelle; GO:0043227 membrane-bounded organelle; GO:0043229 intracellular organelle; GO:0043231 intracellular membrane-bounded organelle;		PF12736	Cell-cycle sustaining, positive selection,
P24821	Tenascin OS=Homo sapiens OX=9606 GN=TNC PE=1 SV=3	TNC	37	61	655	61	61	240.7	4.00599e+08	5.1336e+07	1.64846e+07	8.78732e+07	7.49159e+07	6.49329e+07	2.40396e+08	6.94701e+08	1.24287e+08	7.70181e+08	7.02608e+07	1.25263e+08	7.67185e+08	1.67653e+08	6.45472e+07	1.375	0.545	0.246	0.548	0.304	0.336	1.218	3.133	0.915	2.879	0.346	0.323	1.891	0.6	0.333	2.313	0.143376	extracellular	K06252	TN; tenascin	hsa04510 Focal adhesion; hsa04512 ECM-receptor interaction; hsa05165 Human papillomavirus infection; hsa05206 MicroRNAs in cancer; hsa04151 PI3K-Akt signaling pathway	GO:0000003 reproduction; GO:0001655 urogenital system development; GO:0001763 morphogenesis of a branching structure; GO:0002009 morphogenesis of an epithelium; GO:0003006 developmental process involved in reproduction; GO:0003401 axis elongation; GO:0006464 cellular protein modification process; GO:0006807 nitrogen compound metabolic process; GO:0006950 response to stress; GO:0007154 cell commun…	GO:0005576 extracellular region; GO:0005604 basement membrane; GO:0005614 interstitial matrix; GO:0005622 intracellular; GO:0005623 cell; GO:0005737 cytoplasm; GO:0005783 endoplasmic reticulum; GO:0005788 endoplasmic reticulum lumen; GO:0012505 endomembrane system; GO:0031012 extracellular matrix; GO:0031974 membrane-enclosed lumen; GO:0043226 organelle; GO:0043227 membrane-bounded organelle; GO:…	GO:0001968 fibronectin binding; GO:0005488 binding; GO:0005515 protein binding; GO:0043394 proteoglycan binding; GO:0045545 syndecan binding; GO:0097367 carbohydrate derivative binding;	PF07974; PF00041; PF00147	EGF-like domain; Fibronectin type III domain; Fibrinogen beta and gamma chains, C-terminal globular domain
Q9NY65	Tubulin alpha-8 chain OS=Homo sapiens OX=9606 GN=TUBA8 PE=1 SV=1	TUBA8	39	14	472	1	1	50.1																																	cytoskeleton	K07374	TUBA; tubulin alpha	hsa05016 Huntington disease; hsa04540 Gap junction; hsa04530 Tight junction; hsa05012 Parkinson disease; hsa05010 Alzheimer disease; hsa05132 Salmonella infection; hsa04145 Phagosome; hsa05130 Pathogenic Escherichia coli infection; hsa04210 Apoptosis; hsa05022 Pathways of neurodegeneration - multiple diseases; hsa05014 Amyotrophic lateral sclerosis; hsa05020 Prion disease	GO:0000226 microtubule cytoskeleton organization; GO:0006996 organelle organization; GO:0007010 cytoskeleton organization; GO:0007017 microtubule-based process; GO:0009987 cellular process; GO:0016043 cellular component organization; GO:0071840 cellular component organization or biogenesis;	GO:0005622 intracellular; GO:0005623 cell; GO:0005856 cytoskeleton; GO:0005874 microtubule; GO:0015630 microtubule cytoskeleton; GO:0043226 organelle; GO:0043228 non-membrane-bounded organelle; GO:0043229 intracellular organelle; GO:0043232 intracellular non-membrane-bounded organelle; GO:0099080 supramolecular complex; GO:0099081 supramolecular polymer; GO:0099512 supramolecular fiber; GO:009951…	GO:0005198 structural molecule activity; GO:0005200 structural constituent of cytoskeleton;	PF00091; PF03953	Tubulin/FtsZ family, GTPase domain; Tubulin C-terminal domain
Q9UJA5	tRNA (adenine(58)-N(1))-methyltransferase non-catalytic subunit TRM6 OS=Homo sapiens OX=9606 GN=TRMT6 PE=1 SV=1	TRMT6	8	4	8	4	4	55.8	2.83699e+06	203524	392800	359706	1.02118e+06	563063	1.46753e+06	350482	1.02637e+06	913931	2.53533e+06	1.90604e+06	4.03059e+06	1.0478e+06	993979	1.844	0.409	1.108	0.425	0.784	0.552	1.408	0.299	1.43	0.647	2.365	0.931	1.881	0.71	0.97	1.385	0.335139	nucleus	K03256			GO:0001510 RNA methylation; GO:0006139 nucleobase-containing compound metabolic process; GO:0006725 cellular aromatic compound metabolic process; GO:0006807 nitrogen compound metabolic process; GO:0008152 metabolic process; GO:0009451 RNA modification; GO:0009987 cellular process; GO:0016070 RNA metabolic process; GO:0016071 mRNA metabolic process; GO:0016556 mRNA modification; GO:0032259 methyla…	GO:0005622 intracellular; GO:0005623 cell; GO:0005634 nucleus; GO:0005654 nucleoplasm; GO:0031974 membrane-enclosed lumen; GO:0031981 nuclear lumen; GO:0043226 organelle; GO:0043227 membrane-bounded organelle; GO:0043229 intracellular organelle; GO:0043231 intracellular membrane-bounded organelle; GO:0043233 organelle lumen; GO:0070013 intracellular organelle lumen;
Q9BXI6	TBC1 domain family member 10A OS=Homo sapiens OX=9606 GN=TBC1D10A PE=1 SV=1	TBC1D10A	6	3	16	3	3	57.1	1.54649e+06			1.26754e+06	1.49265e+06	980177		459033			1.13127e+06	2340761	1.55699e+06	1.06007e+06	429137	1.074			1.599	1.225	1.026		0.419			1.127	1.221	0.776	0.767	0.447	0.644	0.0707623	cytoplasm	K19944			GO:0006508 proteolysis; GO:0006807 nitrogen compound metabolic process; GO:0006810 transport; GO:0006886 intracellular protein transport; GO:0008104 protein localization; GO:0008152 metabolic process; GO:0009893 positive regulation of metabolic process; GO:0010467 gene expression; GO:0010604 positive regulation of macromolecule metabolic process; GO:0010950 positive regulation of endopeptidase ac…	GO:0005622 intracellular; GO:0005623 cell; GO:0005886 plasma membrane; GO:0005902 microvillus; GO:0012505 endomembrane system; GO:0016020 membrane; GO:0042995 cell projection; GO:0071944 cell periphery; GO:0098858 actin-based cell projection; GO:0120025 plasma membrane bounded cell projection;	GO:0005096 GTPase activator activity; GO:0005488 binding; GO:0005515 protein binding; GO:0008047 enzyme activator activity; GO:0017016 Ras GTPase binding; GO:0017137 Rab GTPase binding; GO:0019899 enzyme binding; GO:0019904 protein domain specific binding; GO:0030165 PDZ domain binding; GO:0030234 enzyme regulator activity; GO:0030695 GTPase regulator activity; GO:0031267 small GTPase binding; GO…
P23469	Receptor-type tyrosine-protein phosphatase epsilon OS=Homo sapiens OX=9606 GN=PTPRE PE=1 SV=1	PTPRE	6	4	5	3	3	80.6	3.01752e+06		61484.7	1.26911e+06	991815	535017	829456	1.13243e+06	1.07642e+06	913953	320387	1.20893e+06	1.56065e+06	637929	416672	2.574		0.228	1.968	1	0.688	1.045	1.269	1.969	0.849	0.392	0.775	0.956	0.568	0.534	0.719	0.727675	plasma membrane	K18033			GO:0002682 regulation of immune system process; GO:0002694 regulation of leukocyte activation; GO:0006464 cellular protein modification process; GO:0006470 protein dephosphorylation; GO:0006793 phosphorus metabolic process; GO:0006796 phosphate-containing compound metabolic process; GO:0006807 nitrogen compound metabolic process; GO:0007154 cell communication; GO:0007165 signal transduction; GO:0…	GO:0005622 intracellular; GO:0005623 cell; GO:0005634 nucleus; GO:0005737 cytoplasm; GO:0005886 plasma membrane; GO:0016020 membrane; GO:0043226 organelle; GO:0043227 membrane-bounded organelle; GO:0043229 intracellular organelle; GO:0043231 intracellular membrane-bounded organelle; GO:0071944 cell periphery;	GO:0003824 catalytic activity; GO:0004721 phosphoprotein phosphatase activity; GO:0004725 protein tyrosine phosphatase activity; GO:0004888 transmembrane signaling receptor activity; GO:0005001 transmembrane receptor protein tyrosine phosphatase activity; GO:0005488 binding; GO:0005515 protein binding; GO:0016787 hydrolase activity; GO:0016788 hydrolase activity, acting on ester bonds; GO:0016791…	PF00102	Protein-tyrosine phosphatase
O14684	Prostaglandin E synthase OS=Homo sapiens OX=9606 GN=PTGES PE=1 SV=2	PTGES	11	2	21	2	2	17.1	7.23281e+06	939320	409340	2.47115e+06	2.37457e+06	1.88745e+06	2.82001e+06	2.32889e+06	1.78757e+06	6.87e+06	6.01511e+06	4.21376e+06	4637031	3.33599e+06	3.05348e+06	1.833	0.737	0.45	1.138	0.711	0.721	1.055	0.776	0.971	1.897	2.189	0.803	0.844	0.882	1.162	1.262	0.252288	extracellular	K15729	PTGES; microsomal prostaglandin-E synthase 1 [EC:5.3.99.3]	hsa00590 Arachidonic acid metabolism; hsa01100 Metabolic pathways	GO:0001516 prostaglandin biosynthetic process; GO:0001676 long-chain fatty acid metabolic process; GO:0006082 organic acid metabolic process; GO:0006629 lipid metabolic process; GO:0006631 fatty acid metabolic process; GO:0006633 fatty acid biosynthetic process; GO:0006636 unsaturated fatty acid biosynthetic process; GO:0006690 icosanoid metabolic process; GO:0006692 prostanoid metabolic process;…	GO:0005622 intracellular; GO:0005623 cell; GO:0005634 nucleus; GO:0005635 nuclear envelope; GO:0005641 nuclear envelope lumen; GO:0005737 cytoplasm; GO:0005783 endoplasmic reticulum; GO:0005789 endoplasmic reticulum membrane; GO:0012505 endomembrane system; GO:0016020 membrane; GO:0016021 integral component of membrane; GO:0031224 intrinsic component of membrane; GO:0031967 organelle envelope; GO…	GO:0003824 catalytic activity; GO:0004667 prostaglandin-D synthase activity; GO:0005488 binding; GO:0016853 isomerase activity; GO:0016860 intramolecular oxidoreductase activity; GO:0033218 amide binding; GO:0042277 peptide binding; GO:0043167 ion binding; GO:0043168 anion binding; GO:0043295 glutathione binding; GO:0048037 cofactor binding; GO:0050220 prostaglandin-E synthase activity; GO:007234…
P10586	Receptor-type tyrosine-protein phosphatase F OS=Homo sapiens OX=9606 GN=PTPRF PE=1 SV=2	PTPRF	3	4	8	4	4	212.7				236557	477908	271919	1.0477e+06	498642	494521	1.48002e+06	258275	1.85742e+06	1.10358e+06	482814					0.49	0.644	0.468	1.764	0.747	1.209	1.839	0.423	1.592	0.904	0.574		2.119	0.084821	plasma membrane	K05695	PTPRF; receptor-type tyrosine-protein phosphatase F [EC:3.1.3.48]	hsa04520 Adherens junction; hsa04514 Cell adhesion molecules; hsa04910 Insulin signaling pathway; hsa04931 Insulin resistance	GO:0001959 regulation of cytokine-mediated signaling pathway; GO:0001960 negative regulation of cytokine-mediated signaling pathway; GO:0006464 cellular protein modification process; GO:0006470 protein dephosphorylation; GO:0006793 phosphorus metabolic process; GO:0006796 phosphate-containing compound metabolic process; GO:0006807 nitrogen compound metabolic process; GO:0006928 movement of cell o…	GO:0005622 intracellular; GO:0005623 cell; GO:0005737 cytoplasm; GO:0005768 endosome; GO:0005886 plasma membrane; GO:0005887 integral component of plasma membrane; GO:0012505 endomembrane system; GO:0016020 membrane; GO:0016021 integral component of membrane; GO:0030424 axon; GO:0030426 growth cone; GO:0030427 site of polarized growth; GO:0031224 intrinsic component of membrane; GO:0031226 intrin…	GO:0003824 catalytic activity; GO:0004721 phosphoprotein phosphatase activity; GO:0004725 protein tyrosine phosphatase activity; GO:0004888 transmembrane signaling receptor activity; GO:0005001 transmembrane receptor protein tyrosine phosphatase activity; GO:0005102 signaling receptor binding; GO:0005158 insulin receptor binding; GO:0005488 binding; GO:0005515 protein binding; GO:0005539 glycosam…	PF07679; PF00041; PF00102	Immunoglobulin I-set domain; Fibronectin type III domain; Protein-tyrosine phosphatase
Q15257	Serine/threonine-protein phosphatase 2A activator OS=Homo sapiens OX=9606 GN=PTPA PE=1 SV=3	PTPA	27	9	84	9	9	40.6	1.04652e+07	3.56371e+06	971636	7.59782e+06	1.22136e+07	1.07043e+07	6763169	1.37841e+07	5.37642e+06	1.30954e+07	1.14575e+07	1.82363e+07	1.91143e+07	1.70882e+07	1.19834e+07	0.823	0.867	0.332	1.086	1.135	1.269	0.785	1.424	0.906	1.121	1.293	1.077	1.079	1.401	1.415	1.27	0.121404	cytoplasm	K17605	PPP2R4; serine/threonine-protein phosphatase 2A activator	hsa05415 Diabetic cardiomyopathy; hsa04931 Insulin resistance	GO:0000413 protein peptidyl-prolyl isomerization; GO:0006464 cellular protein modification process; GO:0006807 nitrogen compound metabolic process; GO:0008152 metabolic process; GO:0009892 negative regulation of metabolic process; GO:0009893 positive regulation of metabolic process; GO:0009987 cellular process; GO:0010562 positive regulation of phosphorus metabolic process; GO:0010563 negative re…	GO:0000159 protein phosphatase type 2A complex; GO:0005622 intracellular; GO:0005623 cell; GO:0005634 nucleus; GO:0005654 nucleoplasm; GO:0005737 cytoplasm; GO:0008287 protein serine/threonine phosphatase complex; GO:0016020 membrane; GO:0016021 integral component of membrane; GO:0031224 intrinsic component of membrane; GO:0031974 membrane-enclosed lumen; GO:0031981 nuclear lumen; GO:0032991 prot…	GO:0000166 nucleotide binding; GO:0003755 peptidyl-prolyl cis-trans isomerase activity; GO:0003824 catalytic activity; GO:0005102 signaling receptor binding; GO:0005488 binding; GO:0005515 protein binding; GO:0005524 ATP binding; GO:0008047 enzyme activator activity; GO:0008144 drug binding; GO:0008160 protein tyrosine phosphatase activator activity; GO:0016853 isomerase activity; GO:0016859 cis-…
P26599	Polypyrimidine tract-binding protein 1 OS=Homo sapiens OX=9606 GN=PTBP1 PE=1 SV=1	PTBP1	41	14	189	11	15	57.2	4.46196e+07	9.71867e+06	2.29711e+07	2.28551e+07	4.96303e+07	3.13884e+07	3.71966e+07	5.42145e+07	3.60276e+07	5.41425e+07	4.31096e+07	1.02038e+08	1.0294e+08	7.22274e+07	4.00383e+07	0.788	0.531	1.761	0.734	1.036	0.836	0.97	1.258	1.364	1.041	1.093	1.354	1.305	1.33	1.062	1.264	0.0559603	cytoplasm,nucleus	K13218			GO:0000381 regulation of alternative mRNA splicing, via spliceosome; GO:0000956 nuclear-transcribed mRNA catabolic process; GO:0002791 regulation of peptide secretion; GO:0002793 positive regulation of peptide secretion; GO:0003205 cardiac chamber development; GO:0003231 cardiac ventricle development; GO:0006139 nucleobase-containing compound metabolic process; GO:0006259 DNA metabolic process; G…	GO:0005622 intracellular; GO:0005623 cell; GO:0005634 nucleus; GO:0005737 cytoplasm; GO:0042995 cell projection; GO:0043005 neuron projection; GO:0043226 organelle; GO:0043227 membrane-bounded organelle; GO:0043229 intracellular organelle; GO:0043231 intracellular membrane-bounded organelle; GO:0044306 neuron projection terminus; GO:0120025 plasma membrane bounded cell projection;	GO:0000014 single-stranded DNA endodeoxyribonuclease activity; GO:0001067 regulatory region nucleic acid binding; GO:0001069 regulatory region RNA binding; GO:0003676 nucleic acid binding; GO:0003677 DNA binding; GO:0003697 single-stranded DNA binding; GO:0003723 RNA binding; GO:0003729 mRNA binding; GO:0003824 catalytic activity; GO:0004518 nuclease activity; GO:0004519 endonuclease activity; GO…	PF13893; PF11835; PF00076	RNA recognition motif. (a.k.a. RRM, RBD, or RNP domain); Domain of unknown function (DUF3355); RNA recognition motif. (a.k.a. RRM, RBD, or RNP domain)
Q5T8P6	RNA-binding protein 26 OS=Homo sapiens OX=9606 GN=RBM26 PE=1 SV=3	RBM26	3	3	9	3	3	113.5	1.15061e+06			359964	626187	622657	969118	542437		4.0554e+06	256909	2.06963e+06	2.43272e+06	2.00426e+06	452612	0.756			0.43	0.486	0.617	0.94	0.468		2.903	0.242	1.022	1.148	1.374	0.447	1.866	0.354883	nucleus	K13192			GO:0009892 negative regulation of metabolic process; GO:0010563 negative regulation of phosphorus metabolic process; GO:0010921 regulation of phosphatase activity; GO:0010923 negative regulation of phosphatase activity; GO:0019220 regulation of phosphate metabolic process; GO:0019222 regulation of metabolic process; GO:0031323 regulation of cellular metabolic process; GO:0031324 negative regulati…
P62979	Ubiquitin-40S ribosomal protein S27a OS=Homo sapiens OX=9606 GN=RPS27A PE=1 SV=2	RPS27A	65	11	397	11	11	18	2.94552e+08	8.9124e+07	7.13002e+07	1.44562e+08	2.73354e+08	2.39873e+08	1.76436e+08	2.9245e+08	1.2139e+08	3.08088e+08	1.78538e+08	3.95747e+08	4.46076e+08	3.19714e+08	3.28781e+08	1.022	0.957	1.074	0.912	1.121	1.255	0.904	1.334	0.903	1.164	0.889	1.032	1.112	1.157	1.713	1.073	0.577547	extracellular	K02977	RP-S27Ae; ubiquitin-small subunit ribosomal protein S27Ae	hsa04137 Mitophagy - animal; hsa05167 Kaposi sarcoma-associated herpesvirus infection; hsa05022 Pathways of neurodegeneration - multiple diseases; hsa04120 Ubiquitin mediated proteolysis; hsa03010 Ribosome; hsa05171 Coronavirus disease - COVID-19; hsa05131 Shigellosis; hsa05012 Parkinson disease	GO:0000122 negative regulation of transcription by RNA polymerase II; GO:0000165 MAPK cascade; GO:0000184 nuclear-transcribed mRNA catabolic process, nonsense-mediated decay; GO:0000187 activation of MAPK activity; GO:0000209 protein polyubiquitination; GO:0000715 nucleotide-excision repair, DNA damage recognition; GO:0000731 DNA synthesis involved in DNA repair; GO:0000956 nuclear-transcribed mR…	GO:0005622 intracellular; GO:0005623 cell; GO:0005634 nucleus; GO:0005654 nucleoplasm; GO:0005737 cytoplasm; GO:0005739 mitochondrion; GO:0005740 mitochondrial envelope; GO:0005741 mitochondrial outer membrane; GO:0005768 endosome; GO:0005783 endoplasmic reticulum; GO:0005789 endoplasmic reticulum membrane; GO:0005829 cytosol; GO:0005840 ribosome; GO:0005886 plasma membrane; GO:0010008 endosome m…		PF00240; PF01599	Ubiquitin family; Ribosomal protein S27a
P62306	Small nuclear ribonucleoprotein F OS=Homo sapiens OX=9606 GN=SNRPF PE=1 SV=1	SNRPF	31	3	44	3	3	9.7	6.80586e+06	392608		494727	3.93765e+06	2.01632e+06	1.94035e+06	4.26743e+06	799645	1.25752e+06	1.09462e+07	6.43713e+06	1.30633e+07	1.47228e+07	5.78528e+06	1.113	0.199		0.147	0.761	0.497	0.469	0.917	0.28	0.224	2.57	0.791	1.534	2.511	1.421	2.191	0.156174	cytoplasm	K11098	SNRPF; small nuclear ribonucleoprotein F	hsa03040 Spliceosome	GO:0000375 RNA splicing, via transesterification reactions; GO:0000377 RNA splicing, via transesterification reactions with bulged adenosine as nucleophile; GO:0000387 spliceosomal snRNP assembly; GO:0000398 mRNA splicing, via spliceosome; GO:0006139 nucleobase-containing compound metabolic process; GO:0006351 transcription, DNA-templated; GO:0006353 DNA-templated transcription, termination; GO:0…	GO:0005622 intracellular; GO:0005623 cell; GO:0005634 nucleus; GO:0005654 nucleoplasm; GO:0005681 spliceosomal complex; GO:0005683 U7 snRNP; GO:0005684 U2-type spliceosomal complex; GO:0005685 U1 snRNP; GO:0005687 U4 snRNP; GO:0005689 U12-type spliceosomal complex; GO:0005737 cytoplasm; GO:0005829 cytosol; GO:0030532 small nuclear ribonucleoprotein complex; GO:0031974 membrane-enclosed lumen; GO:…	GO:0003676 nucleic acid binding; GO:0003723 RNA binding; GO:0005488 binding; GO:0097159 organic cyclic compound binding; GO:1901363 heterocyclic compound binding;	PF01423	LSM domain
Q9H446	RWD domain-containing protein 1 OS=Homo sapiens OX=9606 GN=RWDD1 PE=1 SV=1	RWDD1	7	2	18	2	2	27.9	1.61026e+06	301844			871099	236620	1.35375e+06	2063884	401880	1.8495e+06	429876	2475318	1.03504e+06	1.21144e+06	915653	1.208	0.7			0.772	0.268	1.499	2.034	0.646	1.511	0.463	1.395	0.557	0.948	1.031	1.52	0.206366	cytoplasm				GO:0002181 cytoplasmic translation; GO:0006412 translation; GO:0006518 peptide metabolic process; GO:0006807 nitrogen compound metabolic process; GO:0008152 metabolic process; GO:0009058 biosynthetic process; GO:0009059 macromolecule biosynthetic process; GO:0009987 cellular process; GO:0010467 gene expression; GO:0019538 protein metabolic process; GO:0034641 cellular nitrogen compound metabolic …	GO:0005844 polysome; GO:0032991 protein-containing complex; GO:1990904 ribonucleoprotein complex;		PF05773	RWD domain
Q9Y291	28S ribosomal protein S33, mitochondrial OS=Homo sapiens OX=9606 GN=MRPS33 PE=1 SV=1	MRPS33	8	1	7	1	1	12.6	121981	201631		267452	457733		486406	226941	304400	317333	267269	971564	623919	830872	597869																		nucleus	K17411			GO:0006412 translation; GO:0006414 translational elongation; GO:0006415 translational termination; GO:0006518 peptide metabolic process; GO:0006807 nitrogen compound metabolic process; GO:0008152 metabolic process; GO:0009058 biosynthetic process; GO:0009059 macromolecule biosynthetic process; GO:0009987 cellular process; GO:0010467 gene expression; GO:0016043 cellular component organization; GO:…	GO:0000313 organellar ribosome; GO:0000314 organellar small ribosomal subunit; GO:0005622 intracellular; GO:0005623 cell; GO:0005737 cytoplasm; GO:0005739 mitochondrion; GO:0005740 mitochondrial envelope; GO:0005743 mitochondrial inner membrane; GO:0005759 mitochondrial matrix; GO:0005761 mitochondrial ribosome; GO:0005763 mitochondrial small ribosomal subunit; GO:0005840 ribosome; GO:0015935 sma…	GO:0003735 structural constituent of ribosome; GO:0005198 structural molecule activity;
Q9BY42	Replication termination factor 2 OS=Homo sapiens OX=9606 GN=RTF2 PE=1 SV=3	RTF2	3	1	2	1	1	33.9																																	mitochondria	K25186			GO:0006139 nucleobase-containing compound metabolic process; GO:0006259 DNA metabolic process; GO:0006260 DNA replication; GO:0006261 DNA-dependent DNA replication; GO:0006274 DNA replication termination; GO:0006725 cellular aromatic compound metabolic process; GO:0006807 nitrogen compound metabolic process; GO:0008152 metabolic process; GO:0009058 biosynthetic process; GO:0009059 macromolecule b…	GO:0005622 intracellular; GO:0005623 cell; GO:0005634 nucleus; GO:0043226 organelle; GO:0043227 membrane-bounded organelle; GO:0043229 intracellular organelle; GO:0043231 intracellular membrane-bounded organelle;
A6ZKI3	Retrotransposon Gag-like protein 8C OS=Homo sapiens OX=9606 GN=RTL8C PE=1 SV=1	RTL8C	17	2	15	2	2	13.2	1.30521e+06			667512	917738	957999	493216	690818		1.00122e+06	783361	332857	1.75349e+06	1.13583e+06	726237	1.239			1.151	1.029	1.371	0.691	0.861		1.035	1.067	0.237	1.195	1.124	1.035	0.756	0.214612	mitochondria
P08621	U1 small nuclear ribonucleoprotein 70 kDa OS=Homo sapiens OX=9606 GN=SNRNP70 PE=1 SV=2	SNRNP70	18	11	97	11	11	51.5	3.43452e+07	4.31537e+06	1.79282e+06	6.20084e+06	1.84147e+07	1.57504e+07	8.74197e+06	1.01987e+07	5.24201e+06	1.02794e+07	1.81749e+07	3.26922e+07	4.79198e+07	3.1513e+07	2.0852e+07	1.646	0.64	0.373	0.54	1.043	1.138	0.619	0.642	0.539	0.537	1.251	1.177	1.649	1.575	1.501	1.176	0.505984	nucleus	K11093	SNRP70; U1 small nuclear ribonucleoprotein 70kDa	hsa03040 Spliceosome	GO:0000375 RNA splicing, via transesterification reactions; GO:0000377 RNA splicing, via transesterification reactions with bulged adenosine as nucleophile; GO:0000398 mRNA splicing, via spliceosome; GO:0006139 nucleobase-containing compound metabolic process; GO:0006396 RNA processing; GO:0006397 mRNA processing; GO:0006725 cellular aromatic compound metabolic process; GO:0006807 nitrogen compou…	GO:0000243 commitment complex; GO:0005622 intracellular; GO:0005623 cell; GO:0005634 nucleus; GO:0005654 nucleoplasm; GO:0005681 spliceosomal complex; GO:0005684 U2-type spliceosomal complex; GO:0005685 U1 snRNP; GO:0005737 cytoplasm; GO:0030532 small nuclear ribonucleoprotein complex; GO:0031974 membrane-enclosed lumen; GO:0031981 nuclear lumen; GO:0032991 protein-containing complex; GO:0043226 …	GO:0003676 nucleic acid binding; GO:0003723 RNA binding; GO:0003729 mRNA binding; GO:0005488 binding; GO:0017069 snRNA binding; GO:0030619 U1 snRNA binding; GO:0043021 ribonucleoprotein complex binding; GO:0044877 protein-containing complex binding; GO:0070990 snRNP binding; GO:0097159 organic cyclic compound binding; GO:1901363 heterocyclic compound binding; GO:1990446 U1 snRNP binding;	PF00076	RNA recognition motif. (a.k.a. RRM, RBD, or RNP domain)
O00442	RNA 3'-terminal phosphate cyclase OS=Homo sapiens OX=9606 GN=RTCA PE=1 SV=1	RTCA	10	3	9	3	3	39.3	1.8449e+06	2.77616e+06	5.07577e+06			1.10362e+06	3.26732e+06	2.94077e+06	1.71808e+06	3.16968e+06	1.20403e+06	858873	1.31934e+06	1.34828e+06	826666	0.744	3.462	8.883			0.671	1.945	1.558	1.485	1.392	0.697	0.26	0.382	0.567	0.5	0.284	0.116194	endoplasmic reticulum,mitochondria	K01974				GO:0005622 intracellular; GO:0005623 cell; GO:0005634 nucleus; GO:0005654 nucleoplasm; GO:0031974 membrane-enclosed lumen; GO:0031981 nuclear lumen; GO:0043226 organelle; GO:0043227 membrane-bounded organelle; GO:0043229 intracellular organelle; GO:0043231 intracellular membrane-bounded organelle; GO:0043233 organelle lumen; GO:0070013 intracellular organelle lumen;	GO:0003824 catalytic activity; GO:0003963 RNA-3'-phosphate cyclase activity; GO:0009975 cyclase activity; GO:0016874 ligase activity; GO:0016886 ligase activity, forming phosphoric ester bonds; GO:0140098 catalytic activity, acting on RNA;	PF01137; PF05189	RNA 3'-terminal phosphate cyclase; RNA 3'-terminal phosphate cyclase (RTC), insert domain
Q9Y3D9	28S ribosomal protein S23, mitochondrial OS=Homo sapiens OX=9606 GN=MRPS23 PE=1 SV=2	MRPS23	11	2	17	2	2	21.8	1.41056e+06	301619		573843	785035	543477	819541	2.05849e+06	452447	846471	1.64805e+06	3.44093e+06	3.13692e+06	1.11324e+06	1.07156e+06	0.924	0.611		0.683	0.608	0.537	0.792	1.771	0.635	0.604	1.549	1.693	1.475	0.76	1.054	1.707	0.0178756	mitochondria	K17402			GO:0006412 translation; GO:0006414 translational elongation; GO:0006415 translational termination; GO:0006518 peptide metabolic process; GO:0006807 nitrogen compound metabolic process; GO:0008152 metabolic process; GO:0009058 biosynthetic process; GO:0009059 macromolecule biosynthetic process; GO:0009987 cellular process; GO:0010467 gene expression; GO:0016043 cellular component organization; GO:…	GO:0000313 organellar ribosome; GO:0000314 organellar small ribosomal subunit; GO:0005622 intracellular; GO:0005623 cell; GO:0005634 nucleus; GO:0005635 nuclear envelope; GO:0005737 cytoplasm; GO:0005739 mitochondrion; GO:0005740 mitochondrial envelope; GO:0005743 mitochondrial inner membrane; GO:0005759 mitochondrial matrix; GO:0005761 mitochondrial ribosome; GO:0005763 mitochondrial small ribos…	GO:0003735 structural constituent of ribosome; GO:0005198 structural molecule activity;
Q8IY34	Solute carrier family 15 member 3 OS=Homo sapiens OX=9606 GN=SLC15A3 PE=1 SV=2	SLC15A3	1	1	1	1	1	63.5	355458													120803	64098.3																		plasma membrane	K14638			GO:0006807 nitrogen compound metabolic process; GO:0006810 transport; GO:0006811 ion transport; GO:0006812 cation transport; GO:0006857 oligopeptide transport; GO:0008152 metabolic process; GO:0009056 catabolic process; GO:0009057 macromolecule catabolic process; GO:0015672 monovalent inorganic cation transport; GO:0015833 peptide transport; GO:0019538 protein metabolic process; GO:0030163 protei…	GO:0000323 lytic vacuole; GO:0005622 intracellular; GO:0005623 cell; GO:0005737 cytoplasm; GO:0005764 lysosome; GO:0005765 lysosomal membrane; GO:0005773 vacuole; GO:0005774 vacuolar membrane; GO:0016020 membrane; GO:0031090 organelle membrane; GO:0043226 organelle; GO:0043227 membrane-bounded organelle; GO:0043229 intracellular organelle; GO:0043231 intracellular membrane-bounded organelle; GO:0…	GO:0005215 transporter activity; GO:0005427 proton-dependent oligopeptide secondary active transmembrane transporter activity; GO:0008324 cation transmembrane transporter activity; GO:0015075 ion transmembrane transporter activity; GO:0015077 monovalent inorganic cation transmembrane transporter activity; GO:0015078 proton transmembrane transporter activity; GO:0015291 secondary active transmembr…
Q9BXP2	Solute carrier family 12 member 9 OS=Homo sapiens OX=9606 GN=SLC12A9 PE=1 SV=1	SLC12A9	9	5	10	5	5	96	2.15425e+06		640261		1.47432e+06	124896	243075	265185		478381	255165	375081	619494	2.28584e+06	844861	2.255		2.909		1.824	0.197	0.376	0.365		0.545	0.383	0.295	0.466	2.495	1.328	0.435	0.210185	plasma membrane	K14429			GO:0006810 transport; GO:0006811 ion transport; GO:0006812 cation transport; GO:0006813 potassium ion transport; GO:0006820 anion transport; GO:0006821 chloride transport; GO:0009987 cellular process; GO:0015672 monovalent inorganic cation transport; GO:0015698 inorganic anion transport; GO:0030001 metal ion transport; GO:0034220 ion transmembrane transport; GO:0051179 localization; GO:0051234 es…	GO:0016020 membrane; GO:0016021 integral component of membrane; GO:0031224 intrinsic component of membrane;	GO:0005215 transporter activity; GO:0008324 cation transmembrane transporter activity; GO:0008509 anion transmembrane transporter activity; GO:0015075 ion transmembrane transporter activity; GO:0015077 monovalent inorganic cation transmembrane transporter activity; GO:0015079 potassium ion transmembrane transporter activity; GO:0015103 inorganic anion transmembrane transporter activity; GO:001510…
Q15750	TGF-beta-activated kinase 1 and MAP3K7-binding protein 1 OS=Homo sapiens OX=9606 GN=TAB1 PE=1 SV=1	TAB1	5	2	4	2	2	54.6						485269					596226			673954	444914						1.132					1.325			1.088	1.034	1.015		nucleus	K04403	MAP3K7IP1; TAK1-binding protein 1	hsa04380 Osteoclast differentiation; hsa05161 Hepatitis B; hsa05170 Human immunodeficiency virus 1 infection; hsa05169 Epstein-Barr virus infection; hsa05131 Shigellosis; hsa05132 Salmonella infection; hsa05168 Herpes simplex virus 1 infection; hsa04621 NOD-like receptor signaling pathway; hsa05145 Toxoplasmosis; hsa05135 Yersinia infection; hsa04010 MAPK signaling pathway; hsa04936 Alcoholic liv…	GO:0000165 MAPK cascade; GO:0000185 activation of MAPKKK activity; GO:0000187 activation of MAPK activity; GO:0001932 regulation of protein phosphorylation; GO:0001934 positive regulation of protein phosphorylation; GO:0002218 activation of innate immune response; GO:0002220 innate immune response activating cell surface receptor signaling pathway; GO:0002221 pattern recognition receptor signalin…	GO:0005622 intracellular; GO:0005623 cell; GO:0005634 nucleus; GO:0005654 nucleoplasm; GO:0005737 cytoplasm; GO:0005768 endosome; GO:0005829 cytosol; GO:0010008 endosome membrane; GO:0012505 endomembrane system; GO:0016020 membrane; GO:0016604 nuclear body; GO:0016607 nuclear speck; GO:0031090 organelle membrane; GO:0031410 cytoplasmic vesicle; GO:0031974 membrane-enclosed lumen; GO:0031981 nucle…	GO:0008047 enzyme activator activity; GO:0030234 enzyme regulator activity; GO:0098772 molecular function regulator;
P60059	Protein transport protein Sec61 subunit gamma OS=Homo sapiens OX=9606 GN=SEC61G PE=1 SV=1	SEC61G	18	1	15	1	1	7.7	823961					242060	1.00274e+06	1.34007e+06		442852	865544	828839	859212	715673																			cytoplasm	K07342	SEC61G; protein transport protein SEC61 subunit gamma and related proteins	hsa04145 Phagosome; hsa03060 Protein export; hsa05110 Vibrio cholerae infection; hsa04141 Protein processing in endoplasmic reticulum
Q92791	Endoplasmic reticulum protein SC65 OS=Homo sapiens OX=9606 GN=P3H4 PE=1 SV=1	P3H4	9	4	7	4	4	50.3	3.55816e+06	1.18204e+06		402556	1.14808e+06	363644	1.94878e+06	788589	366731	1.66817e+06	1.02419e+06	1.90172e+06	1.83317e+06	1.93709e+06	377598	2.292	2.356		0.471	0.874	0.353	1.854	0.668	0.507	1.171	0.947	0.921	0.848	1.301	0.365	0.751	0.782507	extracellular	K22461			GO:0000003 reproduction; GO:0000280 nuclear division; GO:0006464 cellular protein modification process; GO:0006807 nitrogen compound metabolic process; GO:0006996 organelle organization; GO:0007049 cell cycle; GO:0007059 chromosome segregation; GO:0007127 meiosis I; GO:0007129 synapsis; GO:0007130 synaptonemal complex assembly; GO:0008152 metabolic process; GO:0009058 biosynthetic process; GO:000…	GO:0000228 nuclear chromosome; GO:0000793 condensed chromosome; GO:0000794 condensed nuclear chromosome; GO:0000795 synaptonemal complex; GO:0005622 intracellular; GO:0005623 cell; GO:0005634 nucleus; GO:0005694 chromosome; GO:0005730 nucleolus; GO:0005737 cytoplasm; GO:0005783 endoplasmic reticulum; GO:0012505 endomembrane system; GO:0031974 membrane-enclosed lumen; GO:0031981 nuclear lumen; GO:…
Q9NVA2	Septin-11 OS=Homo sapiens OX=9606 GN=SEPTIN11 PE=1 SV=3	SEPTIN11	40	15	160	7	16	49.4	3.91756e+07	2.21898e+07	9.14871e+06	3.06675e+07	4.94689e+07	4.9327e+07	3.34972e+07	2.94469e+07	2.69579e+07	3.30394e+07	4.94949e+07	2.24731e+07	5.78915e+07	3.06961e+07	2.65778e+07	0.981	1.719	0.994	1.395	1.464	1.862	1.238	0.969	1.447	0.901	1.779	0.423	1.041	0.801	0.999	0.76	0.124916	nucleus	K16939	SEPT6_8_11; septin 6/8/11	hsa05100 Bacterial invasion of epithelial cells; hsa05131 Shigellosis	GO:0009987 cellular process; GO:0016043 cellular component organization; GO:0022607 cellular component assembly; GO:0043933 protein-containing complex subunit organization; GO:0044085 cellular component biogenesis; GO:0051259 protein complex oligomerization; GO:0051291 protein heterooligomerization; GO:0065003 protein-containing complex assembly; GO:0071840 cellular component organization or biog…	GO:0001725 stress fiber; GO:0005622 intracellular; GO:0005623 cell; GO:0005856 cytoskeleton; GO:0015629 actin cytoskeleton; GO:0030424 axon; GO:0030425 dendrite; GO:0032432 actin filament bundle; GO:0036477 somatodendritic compartment; GO:0042641 actomyosin; GO:0042995 cell projection; GO:0043005 neuron projection; GO:0043197 dendritic spine; GO:0043226 organelle; GO:0043228 non-membrane-bounded …		PF00735	Septin
P61619	Protein transport protein Sec61 subunit alpha isoform 1 OS=Homo sapiens OX=9606 GN=SEC61A1 PE=1 SV=2	SEC61A1	12	6	31	6	6	52.2	1.30374e+07	1.13018e+06	2.3412e+06	4.05225e+06	6.24299e+06	5.20387e+06	6.85065e+06	5.84165e+06	1.53748e+06	5.52253e+06	3.91235e+06	1.0352e+07	1.12718e+07	1.41466e+07	4.19936e+06	1.741	0.467	1.357	0.983	0.985	1.048	1.35	1.025	0.44	0.803	0.75	1.039	1.081	1.97	0.842	0.942	0.7895	plasma membrane	K10956	SEC61A; protein transport protein SEC61 subunit alpha	hsa04145 Phagosome; hsa03060 Protein export; hsa05110 Vibrio cholerae infection; hsa04141 Protein processing in endoplasmic reticulum	GO:0001655 urogenital system development; GO:0001822 kidney development; GO:0002376 immune system process; GO:0006605 protein targeting; GO:0006612 protein targeting to membrane; GO:0006613 cotranslational protein targeting to membrane; GO:0006614 SRP-dependent cotranslational protein targeting to membrane; GO:0006620 posttranslational protein targeting to endoplasmic reticulum membrane; GO:00068…	GO:0005622 intracellular; GO:0005623 cell; GO:0005737 cytoplasm; GO:0005783 endoplasmic reticulum; GO:0005789 endoplasmic reticulum membrane; GO:0005791 rough endoplasmic reticulum; GO:0005829 cytosol; GO:0012505 endomembrane system; GO:0012506 vesicle membrane; GO:0016020 membrane; GO:0016021 integral component of membrane; GO:0030139 endocytic vesicle; GO:0030176 integral component of endoplasm…	GO:0005215 transporter activity; GO:0005488 binding; GO:0022857 transmembrane transporter activity; GO:0043021 ribonucleoprotein complex binding; GO:0043022 ribosome binding; GO:0044877 protein-containing complex binding;	PF10559	Plug domain of Sec61p
Q9Y3A5	Ribosome maturation protein SBDS OS=Homo sapiens OX=9606 GN=SBDS PE=1 SV=4	SBDS	43	12	109	12	12	28.7	5.78278e+07	1.59152e+07	8.57189e+06	1.7728e+07	4.23067e+07	2.46984e+07	5.40263e+07	8.1586e+07	5.45561e+07	5.68407e+07	5.97576e+07	9.31288e+07	1.30937e+08	6.17565e+07	4.86985e+07	0.914	0.778	0.588	0.509	0.79	0.588	1.26	1.694	1.848	0.978	1.355	1.105	1.485	1.017	1.155	1.903	0.000110971	mitochondria	K14574	SDO1; ribosome maturation protein SDO1	hsa03008 Ribosome biogenesis in eukaryotes	GO:0000226 microtubule cytoskeleton organization; GO:0000278 mitotic cell cycle; GO:0001501 skeletal system development; GO:0001503 ossification; GO:0001701 in utero embryonic development; GO:0001824 blastocyst development; GO:0001832 blastocyst growth; GO:0001833 inner cell mass cell proliferation; GO:0002376 immune system process; GO:0002520 immune system development; GO:0006139 nucleobase-cont…	GO:0000922 spindle pole; GO:0005622 intracellular; GO:0005623 cell; GO:0005634 nucleus; GO:0005654 nucleoplasm; GO:0005730 nucleolus; GO:0005737 cytoplasm; GO:0005819 spindle; GO:0005829 cytosol; GO:0005856 cytoskeleton; GO:0015630 microtubule cytoskeleton; GO:0031974 membrane-enclosed lumen; GO:0031981 nuclear lumen; GO:0043226 organelle; GO:0043227 membrane-bounded organelle; GO:0043228 non-mem…	GO:0003676 nucleic acid binding; GO:0003723 RNA binding; GO:0005488 binding; GO:0005515 protein binding; GO:0008017 microtubule binding; GO:0008092 cytoskeletal protein binding; GO:0015631 tubulin binding; GO:0019843 rRNA binding; GO:0043021 ribonucleoprotein complex binding; GO:0043022 ribosome binding; GO:0044877 protein-containing complex binding; GO:0097159 organic cyclic compound binding; GO…	PF09377	SBDS protein C-terminal domain
Q9NR31	GTP-binding protein SAR1a OS=Homo sapiens OX=9606 GN=SAR1A PE=1 SV=1	SAR1A	63	8	80	5	9	22.4	2.50333e+07	3.82798e+06	1.63395e+06	7.64476e+06	1.60596e+07	1.27548e+07	4.95466e+06	8.05859e+06	3.5151e+06	1.74311e+07	7.33688e+06	2.06074e+07	2.16268e+07	1.94348e+07	1.22804e+07	1.755	0.83	0.497	0.974	1.33	1.348	0.513	0.742	0.528	1.331	0.738	1.085	1.088	1.421	1.293	0.865	0.552944	cytoplasm	K07953	SAR1; GTP-binding protein SAR1 [EC:3.6.5.-]	hsa05134 Legionellosis; hsa04141 Protein processing in endoplasmic reticulum	GO:0006810 transport; GO:0006888 endoplasmic reticulum to Golgi vesicle-mediated transport; GO:0006900 vesicle budding from membrane; GO:0006996 organelle organization; GO:0009987 cellular process; GO:0010639 negative regulation of organelle organization; GO:0016043 cellular component organization; GO:0016050 vesicle organization; GO:0016192 vesicle-mediated transport; GO:0022607 cellular compone…	GO:0005622 intracellular; GO:0005623 cell; GO:0005737 cytoplasm; GO:0005783 endoplasmic reticulum; GO:0005794 Golgi apparatus; GO:0005798 Golgi-associated vesicle; GO:0012505 endomembrane system; GO:0012506 vesicle membrane; GO:0012507 ER to Golgi transport vesicle membrane; GO:0016020 membrane; GO:0016528 sarcoplasm; GO:0016529 sarcoplasmic reticulum; GO:0030117 membrane coat; GO:0030120 vesicle…		PF00025	ADP-ribosylation factor family
O14828	Secretory carrier-associated membrane protein 3 OS=Homo sapiens OX=9606 GN=SCAMP3 PE=1 SV=3	SCAMP3	17	3	17	3	3	38.3	3.68141e+06	3.75944e+06	2.2586e+06	769649	138575	127422	3.47413e+06	2.29451e+06	114720	2.83188e+06	2.28016e+06	3.27536e+06	1.95084e+06	2.19109e+06	1.00131e+06	1.559	4.926	4.153	0.592	0.069	0.081	2.173	1.277	0.104	1.306	1.386	1.042	0.593	0.968	0.637	0.556	0.819233	plasma membrane	K19995			GO:0001101 response to acid chemical; GO:0006810 transport; GO:0006886 intracellular protein transport; GO:0006892 post-Golgi vesicle-mediated transport; GO:0008104 protein localization; GO:0010033 response to organic substance; GO:0015031 protein transport; GO:0015833 peptide transport; GO:0016192 vesicle-mediated transport; GO:0032526 response to retinoic acid; GO:0033036 macromolecule localiza…	GO:0000139 Golgi membrane; GO:0005622 intracellular; GO:0005623 cell; GO:0005737 cytoplasm; GO:0005794 Golgi apparatus; GO:0012505 endomembrane system; GO:0016020 membrane; GO:0031090 organelle membrane; GO:0031984 organelle subcompartment; GO:0043226 organelle; GO:0043227 membrane-bounded organelle; GO:0043229 intracellular organelle; GO:0043231 intracellular membrane-bounded organelle; GO:00985…	GO:0005488 binding; GO:0005515 protein binding; GO:0019899 enzyme binding; GO:0031625 ubiquitin protein ligase binding; GO:0044389 ubiquitin-like protein ligase binding;
Q9BW04	Specifically androgen-regulated gene protein OS=Homo sapiens OX=9606 GN=SARG PE=1 SV=2	SARG	11	4	19	4	4	63.9	3230967	10481854	12753400	13964685	1.08947e+07	22010814	6881104	3.17195e+06	1.0492e+07	4.72115e+06	5704247	6.93982e+06	4.63409e+06	6.47462e+06	1.28764e+07	0.305	3.062	5.228	2.397	1.216	3.134	0.959	0.394	2.124	0.486	0.773	0.492	0.314	0.638	1.826	0.348	0.0437618	nucleus					GO:0005622 intracellular; GO:0005623 cell; GO:0005737 cytoplasm; GO:0005829 cytosol; GO:0005886 plasma membrane; GO:0016020 membrane; GO:0071944 cell periphery;
Q6P3W7	SCY1-like protein 2 OS=Homo sapiens OX=9606 GN=SCYL2 PE=1 SV=1	SCYL2	3	3	7	3	3	103.6	449011	147326		204863	260371	400538	267913	758450		1.63186e+06	301477	2.15523e+06	2.01707e+06	1.37212e+06	328581	0.483	0.49		0.4	0.331	0.649	0.425	1.071		1.911	0.465	1.741	1.557	1.538	0.531	2.454	0.0277012	cytoplasm	K17541			GO:0002090 regulation of receptor internalization; GO:0002092 positive regulation of receptor internalization; GO:0006810 transport; GO:0006897 endocytosis; GO:0006898 receptor-mediated endocytosis; GO:0007034 vacuolar transport; GO:0007041 lysosomal transport; GO:0007154 cell communication; GO:0007165 signal transduction; GO:0007166 cell surface receptor signaling pathway; GO:0007267 cell-cell s…	GO:0000139 Golgi membrane; GO:0005622 intracellular; GO:0005623 cell; GO:0005737 cytoplasm; GO:0005768 endosome; GO:0005794 Golgi apparatus; GO:0005802 trans-Golgi network; GO:0010008 endosome membrane; GO:0012505 endomembrane system; GO:0016020 membrane; GO:0030135 coated vesicle; GO:0030136 clathrin-coated vesicle; GO:0031090 organelle membrane; GO:0031410 cytoplasmic vesicle; GO:0031982 vesicl…	GO:0005102 signaling receptor binding; GO:0005488 binding; GO:0005515 protein binding;	PF00069	Protein kinase domain
P50452	Serpin B8 OS=Homo sapiens OX=9606 GN=SERPINB8 PE=1 SV=2	SERPINB8	33	13	109	10	12	42.7	8.13043e+06	2.60855e+06	1.18026e+06	2.39054e+06	3.93561e+06	5.26342e+06	5.98696e+06	7.04553e+06	1.67638e+06	1.19743e+07	6.35066e+06	1.83064e+07	1.75658e+07	7.4356e+06	8.12174e+06	0.962	0.954	0.606	0.514	0.55	0.939	1.045	1.095	0.425	1.542	1.078	1.627	1.492	0.917	1.443	1.571	0.0506721	cytoplasm	K13965			GO:0007155 cell adhesion; GO:0009892 negative regulation of metabolic process; GO:0010466 negative regulation of peptidase activity; GO:0010605 negative regulation of macromolecule metabolic process; GO:0010951 negative regulation of endopeptidase activity; GO:0019222 regulation of metabolic process; GO:0022610 biological adhesion; GO:0030162 regulation of proteolysis; GO:0031323 regulation of ce…	GO:0005576 extracellular region; GO:0005615 extracellular space; GO:0005622 intracellular; GO:0005623 cell; GO:0005737 cytoplasm; GO:0005829 cytosol;	GO:0004857 enzyme inhibitor activity; GO:0004866 endopeptidase inhibitor activity; GO:0004867 serine-type endopeptidase inhibitor activity; GO:0030234 enzyme regulator activity; GO:0030414 peptidase inhibitor activity; GO:0061134 peptidase regulator activity; GO:0061135 endopeptidase regulator activity; GO:0098772 molecular function regulator;	PF00079	Serpin (serine protease inhibitor)
Q96RF0	Sorting nexin-18 OS=Homo sapiens OX=9606 GN=SNX18 PE=1 SV=2	SNX18	10	5	33	5	5	68.9	8.81223e+06		451187	2.48003e+06	5.41617e+06	3.75378e+06	1.43095e+06	1.49589e+06	1.8117e+06	2.4325e+06	1.30629e+06	3.46979e+06	4.31471e+06	9.18774e+06	2.02721e+06	2.171		0.482	1.11	1.577	1.394	0.52	0.484	0.957	0.653	0.462	0.642	0.763	2.36	0.75	0.626	0.114638	nucleus	K17923	SNX9_18_33; sorting nexin-9/18/33	hsa05132 Salmonella infection	GO:0000278 mitotic cell cycle; GO:0000281 mitotic cytokinesis; GO:0000910 cytokinesis; GO:0006810 transport; GO:0006897 endocytosis; GO:0007049 cell cycle; GO:0009987 cellular process; GO:0010324 membrane invagination; GO:0016043 cellular component organization; GO:0016192 vesicle-mediated transport; GO:0016197 endosomal transport; GO:0022402 cell cycle process; GO:0032506 cytokinetic process; GO…	GO:0005576 extracellular region; GO:0005615 extracellular space; GO:0005622 intracellular; GO:0005623 cell; GO:0005737 cytoplasm; GO:0005768 endosome; GO:0005886 plasma membrane; GO:0009898 cytoplasmic side of plasma membrane; GO:0010008 endosome membrane; GO:0012505 endomembrane system; GO:0012506 vesicle membrane; GO:0016020 membrane; GO:0019897 extrinsic component of plasma membrane; GO:001989…	GO:0005488 binding; GO:0005543 phospholipid binding; GO:0005546 phosphatidylinositol-4,5-bisphosphate binding; GO:0008289 lipid binding; GO:0035091 phosphatidylinositol binding; GO:0043167 ion binding; GO:0043168 anion binding; GO:1901981 phosphatidylinositol phosphate binding; GO:1902936 phosphatidylinositol bisphosphate binding;	PF00787; PF10456	PX domain; WASP-binding domain of Sorting nexin protein
Q8TAQ2	SWI/SNF complex subunit SMARCC2 OS=Homo sapiens OX=9606 GN=SMARCC2 PE=1 SV=1	SMARCC2	16	15	118	9	16	132.8	1.91481e+08	2.22396e+07	1.38125e+07	4.67569e+07	1.01155e+08	5.85312e+07	8.10822e+07	9.39219e+07	3.88755e+07	8.96655e+07	9.21135e+07	1.08906e+08	1.81104e+08	1.50549e+08	7.88265e+07	1.813	0.651	0.568	0.804	1.132	0.835	1.133	1.168	0.789	0.924	1.252	0.775	1.231	1.486	1.121	1.135	0.280524	nucleus	K11649	SMARCC; SWI/SNF related-matrix-associated actin-dependent regulator of chromatin subfamily C	hsa05225 Hepatocellular carcinoma; hsa04714 Thermogenesis	GO:0000122 negative regulation of transcription by RNA polymerase II; GO:0006325 chromatin organization; GO:0006333 chromatin assembly or disassembly; GO:0006337 nucleosome disassembly; GO:0006338 chromatin remodeling; GO:0006355 regulation of transcription, DNA-templated; GO:0006357 regulation of transcription by RNA polymerase II; GO:0006996 organelle organization; GO:0007275 multicellular orga…	GO:0000228 nuclear chromosome; GO:0000785 chromatin; GO:0000790 nuclear chromatin; GO:0005622 intracellular; GO:0005623 cell; GO:0005634 nucleus; GO:0005654 nucleoplasm; GO:0005694 chromosome; GO:0016514 SWI/SNF complex; GO:0031974 membrane-enclosed lumen; GO:0031981 nuclear lumen; GO:0032991 protein-containing complex; GO:0043226 organelle; GO:0043227 membrane-bounded organelle; GO:0043228 non-m…	GO:0000981 DNA-binding transcription factor activity, RNA polymerase II-specific; GO:0003682 chromatin binding; GO:0003700 DNA-binding transcription factor activity; GO:0003712 transcription coregulator activity; GO:0003713 transcription coactivator activity; GO:0005488 binding; GO:0140110 transcription regulator activity;	PF04433; PF00249	SWIRM domain; Myb-like DNA-binding domain
Q92922	SWI/SNF complex subunit SMARCC1 OS=Homo sapiens OX=9606 GN=SMARCC1 PE=1 SV=3	SMARCC1	10	10	82	4	4	122.8	1.79526e+06	224377	290207	326691	206255	405835	414442	1.04001e+06	1.13168e+06	1.3503e+06	537901	2.71799e+06	3.21947e+06	2.31729e+06	975744	1.352	0.523	0.949	0.447	0.184	0.461	0.461	1.029	1.828	1.108	0.582	1.538	1.741	1.82	1.104	1.909	0.0319962	cytoplasm	K11649	SMARCC; SWI/SNF related-matrix-associated actin-dependent regulator of chromatin subfamily C	hsa05225 Hepatocellular carcinoma; hsa04714 Thermogenesis	GO:0006323 DNA packaging; GO:0006325 chromatin organization; GO:0006333 chromatin assembly or disassembly; GO:0006337 nucleosome disassembly; GO:0006338 chromatin remodeling; GO:0006355 regulation of transcription, DNA-templated; GO:0006357 regulation of transcription by RNA polymerase II; GO:0006996 organelle organization; GO:0007154 cell communication; GO:0007165 signal transduction; GO:0007166…	GO:0000228 nuclear chromosome; GO:0000785 chromatin; GO:0000790 nuclear chromatin; GO:0000803 sex chromosome; GO:0001741 XY body; GO:0005622 intracellular; GO:0005623 cell; GO:0005634 nucleus; GO:0005654 nucleoplasm; GO:0005694 chromosome; GO:0005737 cytoplasm; GO:0016514 SWI/SNF complex; GO:0031974 membrane-enclosed lumen; GO:0031981 nuclear lumen; GO:0032991 protein-containing complex; GO:00432…	GO:0000981 DNA-binding transcription factor activity, RNA polymerase II-specific; GO:0003682 chromatin binding; GO:0003700 DNA-binding transcription factor activity; GO:0003712 transcription coregulator activity; GO:0003713 transcription coactivator activity; GO:0005488 binding; GO:0005515 protein binding; GO:0047485 protein N-terminus binding; GO:0140110 transcription regulator activity;	PF04433; PF00249	SWIRM domain; Myb-like DNA-binding domain
P35326	Small proline-rich protein 2A OS=Homo sapiens OX=9606 GN=SPRR2A PE=1 SV=1	SPRR2A	92	5	72	1	1	8	543759	423668	613330	1.35704e+06	903230	1.57075e+06	2.08002e+07	3.27653e+07	17452432	2.47696e+07	6.8991e+06	2.20874e+07	3.05868e+07	1.98798e+07	2.30009e+07																		extracellular
Q9NSD9	Phenylalanine--tRNA ligase beta subunit OS=Homo sapiens OX=9606 GN=FARSB PE=1 SV=3	FARSB	24	15	150	15	15	66.1	1.61926e+07	1.74625e+07	6.15128e+06	1.17685e+07	1.72407e+07	1.21736e+07	3.91374e+07	2.76904e+07	1.83924e+07	5.3779e+07	1.04409e+07	7.85979e+07	4.37974e+07	2.67775e+07	1.77704e+07	0.52	1.736	0.858	0.687	0.655	0.59	1.857	1.169	1.267	1.882	0.482	1.898	1.011	0.897	0.858	1.496	0.106072	cytoplasm	K01890	FARSB; phenylalanyl-tRNA synthetase beta chain [EC:6.1.1.20]	hsa00970 Aminoacyl-tRNA biosynthesis	GO:0006082 organic acid metabolic process; GO:0006139 nucleobase-containing compound metabolic process; GO:0006399 tRNA metabolic process; GO:0006412 translation; GO:0006418 tRNA aminoacylation for protein translation; GO:0006432 phenylalanyl-tRNA aminoacylation; GO:0006518 peptide metabolic process; GO:0006520 cellular amino acid metabolic process; GO:0006725 cellular aromatic compound metabolic…	GO:0005622 intracellular; GO:0005623 cell; GO:0005737 cytoplasm; GO:0005829 cytosol; GO:0009328 phenylalanine-tRNA ligase complex; GO:0032991 protein-containing complex; GO:1902494 catalytic complex;	GO:0003824 catalytic activity; GO:0004812 aminoacyl-tRNA ligase activity; GO:0004826 phenylalanine-tRNA ligase activity; GO:0016874 ligase activity; GO:0016875 ligase activity, forming carbon-oxygen bonds; GO:0140098 catalytic activity, acting on RNA; GO:0140101 catalytic activity, acting on a tRNA;	PF03483; PF03484	B3/4 domain; tRNA synthetase B5 domain
P14868	Aspartate--tRNA ligase, cytoplasmic OS=Homo sapiens OX=9606 GN=DARS1 PE=1 SV=2	DARS1	47	21	265	21	21	57.1	5.94829e+07	1.33632e+07	1.64838e+07	2.45875e+07	3.35967e+07	2.56296e+07	3.69431e+07	4.04974e+07	2.72613e+07	5.7901e+07	3.83005e+07	9.29873e+07	7.37801e+07	5.38623e+07	2.78609e+07	1.22	0.848	1.468	0.917	0.815	0.793	1.119	1.092	1.199	1.294	1.128	1.433	1.087	1.152	0.858	1.14	0.159167	cytoplasm	K22503	DARS1; aspartyl-tRNA synthetase [EC:6.1.1.12]	hsa00970 Aminoacyl-tRNA biosynthesis	GO:0006082 organic acid metabolic process; GO:0006139 nucleobase-containing compound metabolic process; GO:0006399 tRNA metabolic process; GO:0006412 translation; GO:0006418 tRNA aminoacylation for protein translation; GO:0006422 aspartyl-tRNA aminoacylation; GO:0006518 peptide metabolic process; GO:0006520 cellular amino acid metabolic process; GO:0006725 cellular aromatic compound metabolic pro…	GO:0005622 intracellular; GO:0005623 cell; GO:0005737 cytoplasm; GO:0005829 cytosol; GO:0017101 aminoacyl-tRNA synthetase multienzyme complex; GO:0032991 protein-containing complex; GO:0045202 synapse;	GO:0003824 catalytic activity; GO:0004046 aminoacylase activity; GO:0004812 aminoacyl-tRNA ligase activity; GO:0004815 aspartate-tRNA ligase activity; GO:0016787 hydrolase activity; GO:0016810 hydrolase activity, acting on carbon-nitrogen (but not peptide) bonds; GO:0016811 hydrolase activity, acting on carbon-nitrogen (but not peptide) bonds, in linear amides; GO:0016874 ligase activity; GO:0016…	PF01336; PF00152	OB-fold nucleic acid binding domain; tRNA synthetases class II (D, K and N)
Q8N511	Transmembrane protein 199 OS=Homo sapiens OX=9606 GN=TMEM199 PE=1 SV=1	TMEM199	10	2	3	2	2	23.1	1.53918e+06	342387		322805	415318	199563	3.43465e+06					683964	852749	1.54585e+06		1.263	0.869		0.481	0.403	0.247	4.161					0.422	0.503	1.323		2.455	0.303479	plasma membrane	K23542			GO:0006807 nitrogen compound metabolic process; GO:0006873 cellular ion homeostasis; GO:0006875 cellular metal ion homeostasis; GO:0006879 cellular iron ion homeostasis; GO:0006885 regulation of pH; GO:0006996 organelle organization; GO:0007033 vacuole organization; GO:0007035 vacuolar acidification; GO:0007039 protein catabolic process in the vacuole; GO:0007040 lysosome organization; GO:0007042…	GO:0005622 intracellular; GO:0005623 cell; GO:0005737 cytoplasm; GO:0005773 vacuole; GO:0005774 vacuolar membrane; GO:0005783 endoplasmic reticulum; GO:0005793 endoplasmic reticulum-Golgi intermediate compartment; GO:0005798 Golgi-associated vesicle; GO:0012505 endomembrane system; GO:0012506 vesicle membrane; GO:0016020 membrane; GO:0016469 proton-transporting two-sector ATPase complex; GO:00164…
Q6ZUI0	Tumor protein p63-regulated gene 1 protein OS=Homo sapiens OX=9606 GN=TPRG1 PE=1 SV=1	TPRG1	3	1	4	1	1	31.2										300940		823808		339217																			cytoskeleton					GO:0005622 intracellular; GO:0005623 cell; GO:0005737 cytoplasm;
Q12931	Heat shock protein 75 kDa, mitochondrial OS=Homo sapiens OX=9606 GN=TRAP1 PE=1 SV=3	TRAP1	21	13	119	12	12	80.1	1.0536e+07	1.57056e+06	1.02081e+06	3.76762e+06	4.57305e+06	4.6132e+06	8.5856e+06	6.75066e+06	3.71508e+06	9.51895e+06	4.62463e+06	2.14797e+07	1.57387e+07	6.91503e+06	4.75736e+06	1.244	0.574	0.523	0.808	0.638	0.821	1.496	1.047	0.94	1.224	0.784	1.905	1.334	0.851	0.844	1.508	0.0237558	mitochondria	K09488	TRAP1; TNF receptor-associated protein 1	hsa05022 Pathways of neurodegeneration - multiple diseases; hsa05012 Parkinson disease	GO:0006417 regulation of translation; GO:0006457 protein folding; GO:0009386 translational attenuation; GO:0009889 regulation of biosynthetic process; GO:0009890 negative regulation of biosynthetic process; GO:0009892 negative regulation of metabolic process; GO:0009966 regulation of signal transduction; GO:0009968 negative regulation of signal transduction; GO:0009987 cellular process; GO:001046…	GO:0005622 intracellular; GO:0005623 cell; GO:0005634 nucleus; GO:0005654 nucleoplasm; GO:0005737 cytoplasm; GO:0005739 mitochondrion; GO:0005740 mitochondrial envelope; GO:0005743 mitochondrial inner membrane; GO:0005758 mitochondrial intermembrane space; GO:0005759 mitochondrial matrix; GO:0016020 membrane; GO:0019866 organelle inner membrane; GO:0031090 organelle membrane; GO:0031966 mitochond…	GO:0003676 nucleic acid binding; GO:0003723 RNA binding; GO:0005102 signaling receptor binding; GO:0005126 cytokine receptor binding; GO:0005164 tumor necrosis factor receptor binding; GO:0005488 binding; GO:0005515 protein binding; GO:0019899 enzyme binding; GO:0019900 kinase binding; GO:0019901 protein kinase binding; GO:0032813 tumor necrosis factor receptor superfamily binding; GO:0097159 org…	PF13589	Histidine kinase-, DNA gyrase B-, and HSP90-like ATPase
P12270	Nucleoprotein TPR OS=Homo sapiens OX=9606 GN=TPR PE=1 SV=3	TPR	18	35	160	35	35	267.1	6.06298e+07	4.73273e+07	1.16579e+07	1.69987e+07	7.62569e+07	2.59441e+07	7.27947e+07	6.39329e+07	5.58814e+07	5.06305e+07	5.27014e+07	7.67142e+07	7.84041e+07	5.49698e+07	2.34151e+07	1.008	2.434	0.841	0.514	1.498	0.65	1.786	1.396	1.991	0.917	1.258	0.958	0.936	0.953	0.585	1.035	0.654178	nucleus	K09291	TPR; nucleoprotein TPR	hsa05216 Thyroid cancer; hsa03013 Nucleocytoplasmic transport; hsa05014 Amyotrophic lateral sclerosis; hsa05200 Pathways in cancer	GO:0000075 cell cycle checkpoint; GO:0000122 negative regulation of transcription by RNA polymerase II; GO:0000278 mitotic cell cycle; GO:0001672 regulation of chromatin assembly or disassembly; GO:0006355 regulation of transcription, DNA-templated; GO:0006357 regulation of transcription by RNA polymerase II; GO:0006403 RNA localization; GO:0006404 RNA import into nucleus; GO:0006405 RNA export f…	GO:0000775 chromosome, centromeric region; GO:0000776 kinetochore; GO:0005622 intracellular; GO:0005623 cell; GO:0005634 nucleus; GO:0005635 nuclear envelope; GO:0005643 nuclear pore; GO:0005654 nucleoplasm; GO:0005694 chromosome; GO:0005737 cytoplasm; GO:0005819 spindle; GO:0005856 cytoskeleton; GO:0005868 cytoplasmic dynein complex; GO:0005875 microtubule associated complex; GO:0012505 endomemb…	GO:0003676 nucleic acid binding; GO:0003682 chromatin binding; GO:0003723 RNA binding; GO:0003729 mRNA binding; GO:0005198 structural molecule activity; GO:0005488 binding; GO:0005515 protein binding; GO:0008092 cytoskeletal protein binding; GO:0015631 tubulin binding; GO:0017056 structural constituent of nuclear pore; GO:0019899 enzyme binding; GO:0019900 kinase binding; GO:0019901 protein kinas…
Q9Y490	Talin-1 OS=Homo sapiens OX=9606 GN=TLN1 PE=1 SV=3	TLN1	53	105	1332	91	106	269.6	5.02114e+08	1.29862e+08	7.76571e+07	2.53129e+08	2.69677e+08	2.61941e+08	2.60089e+08	2.15601e+08	1.12671e+08	3.86553e+08	2.10702e+08	2.90979e+08	3.99667e+08	3.36595e+08	1.79339e+08	1.65	1.32	1.108	1.512	1.047	1.298	1.262	0.931	0.794	1.383	0.994	0.718	0.943	1.153	0.885	0.761	0.0193372	cytoplasm,nucleus	K06271	TLN; talin	hsa04510 Focal adhesion; hsa04015 Rap1 signaling pathway; hsa04611 Platelet activation; hsa05166 Human T-cell leukemia virus 1 infection; hsa05131 Shigellosis	GO:0002576 platelet degranulation; GO:0003008 system process; GO:0003012 muscle system process; GO:0006810 transport; GO:0006887 exocytosis; GO:0006936 muscle contraction; GO:0006950 response to stress; GO:0006986 response to unfolded protein; GO:0006996 organelle organization; GO:0007010 cytoskeleton organization; GO:0007043 cell-cell junction assembly; GO:0007044 cell-substrate junction assembl…	GO:0001726 ruffle; GO:0005576 extracellular region; GO:0005622 intracellular; GO:0005623 cell; GO:0005737 cytoplasm; GO:0005829 cytosol; GO:0005912 adherens junction; GO:0005925 focal adhesion; GO:0030054 cell junction; GO:0030055 cell-substrate junction; GO:0031252 cell leading edge; GO:0042995 cell projection; GO:0070161 anchoring junction; GO:0120025 plasma membrane bounded cell projection;	GO:0001786 phosphatidylserine binding; GO:0005102 signaling receptor binding; GO:0005178 integrin binding; GO:0005198 structural molecule activity; GO:0005200 structural constituent of cytoskeleton; GO:0005488 binding; GO:0005515 protein binding; GO:0005543 phospholipid binding; GO:0008092 cytoskeletal protein binding; GO:0008289 lipid binding; GO:0017166 vinculin binding; GO:0019904 protein doma…	PF09379; PF00373; PF09141; PF08913	FERM N-terminal domain ; FERM central domain; Talin, middle domain; Vinculin Binding Site
O95292	Vesicle-associated membrane protein-associated protein B/C OS=Homo sapiens OX=9606 GN=VAPB PE=1 SV=3	VAPB	19	5	42	4	4	27.2	3.77912e+06	1.66554e+06	100319	1.39973e+06	4.40376e+06	2.10789e+06	1.6559e+06	3.515e+06		3.66237e+06	1.9961e+06	3370643	3.20879e+06	3.95083e+06	2.43106e+06	1.209	1.649	0.139	0.814	1.665	1.017	0.782	1.478		1.276	0.917	0.81	0.737	1.318	1.168	0.98	0.594478	cytoplasm	K10707	VAPB; vesicle-associated membrane protein-associated protein B	hsa04979 Cholesterol metabolism; hsa05022 Pathways of neurodegeneration - multiple diseases; hsa05014 Amyotrophic lateral sclerosis	GO:0006629 lipid metabolic process; GO:0006643 membrane lipid metabolic process; GO:0006665 sphingolipid metabolic process; GO:0006807 nitrogen compound metabolic process; GO:0006810 transport; GO:0006873 cellular ion homeostasis; GO:0006874 cellular calcium ion homeostasis; GO:0006875 cellular metal ion homeostasis; GO:0006888 endoplasmic reticulum to Golgi vesicle-mediated transport; GO:0006900…	GO:0005622 intracellular; GO:0005623 cell; GO:0005737 cytoplasm; GO:0005783 endoplasmic reticulum; GO:0005789 endoplasmic reticulum membrane; GO:0005794 Golgi apparatus; GO:0012505 endomembrane system; GO:0016020 membrane; GO:0031984 organelle subcompartment; GO:0042175 nuclear outer membrane-endoplasmic reticulum membrane network; GO:0043226 organelle; GO:0043227 membrane-bounded organelle; GO:0…	GO:0005488 binding; GO:0005515 protein binding; GO:0008017 microtubule binding; GO:0008092 cytoskeletal protein binding; GO:0015631 tubulin binding; GO:0019899 enzyme binding; GO:0019904 protein domain specific binding; GO:0033149 FFAT motif binding; GO:0042802 identical protein binding; GO:0042803 protein homodimerization activity; GO:0046982 protein heterodimerization activity; GO:0046983 prote…	PF00635	MSP (Major sperm protein) domain
O94888	UBX domain-containing protein 7 OS=Homo sapiens OX=9606 GN=UBXN7 PE=1 SV=2	UBXN7	12	5	25	5	5	54.8	2.51897e+06	766133	1.17736e+06	1.31364e+06	3.16292e+06	1.32002e+06	1.48552e+06	3.1813e+06	1.11442e+06	2760262	1.45428e+06	2.03208e+06	3.98692e+06	4.56885e+06	3.39457e+06	0.94	0.884	1.906	0.89	1.394	0.742	0.818	1.559	0.891	1.121	0.779	0.569	1.068	1.777	1.902	1.035	0.937881	nucleus	K24350			GO:0006464 cellular protein modification process; GO:0006807 nitrogen compound metabolic process; GO:0008152 metabolic process; GO:0009987 cellular process; GO:0019538 protein metabolic process; GO:0036211 protein modification process; GO:0043170 macromolecule metabolic process; GO:0043412 macromolecule modification; GO:0043687 post-translational protein modification; GO:0044237 cellular metaboli…	GO:0005622 intracellular; GO:0005623 cell; GO:0005634 nucleus; GO:0005654 nucleoplasm; GO:0005737 cytoplasm; GO:0005783 endoplasmic reticulum; GO:0005789 endoplasmic reticulum membrane; GO:0005829 cytosol; GO:0012505 endomembrane system; GO:0016020 membrane; GO:0016604 nuclear body; GO:0031974 membrane-enclosed lumen; GO:0031981 nuclear lumen; GO:0031984 organelle subcompartment; GO:0032991 prote…	GO:0005488 binding; GO:0005515 protein binding; GO:0008134 transcription factor binding; GO:0019899 enzyme binding; GO:0031625 ubiquitin protein ligase binding; GO:0032182 ubiquitin-like protein binding; GO:0043130 ubiquitin binding; GO:0044389 ubiquitin-like protein ligase binding;	PF13899; PF00789	Thioredoxin-like; UBX domain
Q9BZF1	Oxysterol-binding protein-related protein 8 OS=Homo sapiens OX=9606 GN=OSBPL8 PE=1 SV=3	OSBPL8	6	4	26	4	4	101.1	299280	55730.2		725982	1.17113e+06	968230			1.24008e+06	406170	198501	442438	296630	1.37401e+06	884035	0.379	0.218		1.672	1.754	1.85			3.369	0.561	0.361	0.421	0.27	1.816	1.682	1.031	0.939094	cytoplasm	K22285			GO:0001932 regulation of protein phosphorylation; GO:0001934 positive regulation of protein phosphorylation; GO:0006575 cellular modified amino acid metabolic process; GO:0006629 lipid metabolic process; GO:0006644 phospholipid metabolic process; GO:0006650 glycerophospholipid metabolic process; GO:0006658 phosphatidylserine metabolic process; GO:0006793 phosphorus metabolic process; GO:0006796 p…	GO:0005622 intracellular; GO:0005623 cell; GO:0005634 nucleus; GO:0005635 nuclear envelope; GO:0005737 cytoplasm; GO:0005783 endoplasmic reticulum; GO:0005829 cytosol; GO:0005938 cell cortex; GO:0012505 endomembrane system; GO:0016020 membrane; GO:0031090 organelle membrane; GO:0031965 nuclear membrane; GO:0031967 organelle envelope; GO:0031975 envelope; GO:0031984 organelle subcompartment; GO:00…	GO:0001786 phosphatidylserine binding; GO:0005215 transporter activity; GO:0005319 lipid transporter activity; GO:0005488 binding; GO:0005496 steroid binding; GO:0005543 phospholipid binding; GO:0005548 phospholipid transporter activity; GO:0008289 lipid binding; GO:0015485 cholesterol binding; GO:0032934 sterol binding; GO:0035091 phosphatidylinositol binding; GO:0036094 small molecule binding; …	PF00169	PH domain
O60313	Dynamin-like 120 kDa protein, mitochondrial OS=Homo sapiens OX=9606 GN=OPA1 PE=1 SV=3	OPA1	6	6	14	6	6	111.6	1.29682e+06	517819		565085	1.0083e+06	516721	605542	637517		1.31604e+06	352104	3.61017e+06	2.26106e+06	2.1523e+06	1.22783e+06	0.893	1.103		0.707	0.821	0.537	0.616	0.577		0.987	0.348	1.868	1.118	1.546	1.27	1.282	0.595058	mitochondria	K17079	OPA1; optic atrophy protein 1 [EC:3.6.5.5]	hsa05017 Spinocerebellar ataxia	GO:0000002 mitochondrial genome maintenance; GO:0000266 mitochondrial fission; GO:0001101 response to acid chemical; GO:0001654 eye development; GO:0001666 response to hypoxia; GO:0001678 cellular glucose homeostasis; GO:0001838 embryonic epithelial tube formation; GO:0001841 neural tube formation; GO:0001843 neural tube closure; GO:0002009 morphogenesis of an epithelium; GO:0003008 system proces…	GO:0005622 intracellular; GO:0005623 cell; GO:0005634 nucleus; GO:0005654 nucleoplasm; GO:0005737 cytoplasm; GO:0005739 mitochondrion; GO:0005740 mitochondrial envelope; GO:0005741 mitochondrial outer membrane; GO:0005743 mitochondrial inner membrane; GO:0005758 mitochondrial intermembrane space; GO:0005829 cytosol; GO:0016020 membrane; GO:0019866 organelle inner membrane; GO:0019867 outer membra…	GO:0000287 magnesium ion binding; GO:0003824 catalytic activity; GO:0003924 GTPase activity; GO:0005488 binding; GO:0005515 protein binding; GO:0005543 phospholipid binding; GO:0008017 microtubule binding; GO:0008092 cytoskeletal protein binding; GO:0008289 lipid binding; GO:0015631 tubulin binding; GO:0016462 pyrophosphatase activity; GO:0016787 hydrolase activity; GO:0016817 hydrolase activity,…	PF00350	Dynamin family
P57721	Poly(rC)-binding protein 3 OS=Homo sapiens OX=9606 GN=PCBP3 PE=1 SV=2	PCBP3	15	4	71	1	1	39.4	8.84007e+06	1.1312e+06	694281	1.34905e+06	1.64139e+06	2.13322e+06	1.97712e+06	2.85086e+06	1.39433e+06	5.06011e+06	1.46258e+06	3.46152e+06	4.1143e+06	2.20993e+06	1.15e+06																		cytoplasm	K21444			GO:0000122 negative regulation of transcription by RNA polymerase II; GO:0006139 nucleobase-containing compound metabolic process; GO:0006355 regulation of transcription, DNA-templated; GO:0006357 regulation of transcription by RNA polymerase II; GO:0006725 cellular aromatic compound metabolic process; GO:0006807 nitrogen compound metabolic process; GO:0008152 metabolic process; GO:0009889 regula…		GO:0000981 DNA-binding transcription factor activity, RNA polymerase II-specific; GO:0001227 DNA-binding transcription repressor activity, RNA polymerase II-specific; GO:0003676 nucleic acid binding; GO:0003677 DNA binding; GO:0003690 double-stranded DNA binding; GO:0003697 single-stranded DNA binding; GO:0003700 DNA-binding transcription factor activity; GO:0005488 binding; GO:0097159 organic cy…	PF00013	KH domain
Q68DD2	Cytosolic phospholipase A2 zeta OS=Homo sapiens OX=9606 GN=PLA2G4F PE=1 SV=3	PLA2G4F	1	1	6	1	1	95			138290	163923	853661	304391				293062		814467	355623	165674	262671																		mitochondria	K16342	PLA2G4; cytosolic phospholipase A2 [EC:3.1.1.4]	hsa04666 Fc gamma R-mediated phagocytosis; hsa04014 Ras signaling pathway; hsa04913 Ovarian steroidogenesis; hsa04270 Vascular smooth muscle contraction; hsa00590 Arachidonic acid metabolism; hsa04921 Oxytocin signaling pathway; hsa00592 alpha-Linolenic acid metabolism; hsa04370 VEGF signaling pathway; hsa01100 Metabolic pathways; hsa04010 MAPK signaling pathway; hsa00591 Linoleic acid metabolism…	GO:0006575 cellular modified amino acid metabolic process; GO:0006629 lipid metabolic process; GO:0006644 phospholipid metabolic process; GO:0006650 glycerophospholipid metabolic process; GO:0006658 phosphatidylserine metabolic process; GO:0006793 phosphorus metabolic process; GO:0006796 phosphate-containing compound metabolic process; GO:0006807 nitrogen compound metabolic process; GO:0008152 me…	GO:0005622 intracellular; GO:0005623 cell; GO:0005737 cytoplasm; GO:0005829 cytosol;	GO:0003824 catalytic activity; GO:0004620 phospholipase activity; GO:0004622 lysophospholipase activity; GO:0004623 phospholipase A2 activity; GO:0008970 phospholipase A1 activity; GO:0016298 lipase activity; GO:0016787 hydrolase activity; GO:0016788 hydrolase activity, acting on ester bonds; GO:0052689 carboxylic ester hydrolase activity;	PF00168	C2 domain
Q15042	Rab3 GTPase-activating protein catalytic subunit OS=Homo sapiens OX=9606 GN=RAB3GAP1 PE=1 SV=3	RAB3GAP1	6	5	16	5	5	110.5	2.62555e+06	1.49014e+06	895679	2.09802e+06	770729	871701	2.83744e+06	478128	2.01842e+06	1.19307e+06	380356	854361	2.4112e+06	1.83061e+06	551496	1.574	2.763	2.331	2.285	0.546	0.788	2.511	0.377	2.594	0.779	0.327	0.385	1.038	1.144	0.496	0.625	0.149867	nucleus	K18270			GO:0001505 regulation of neurotransmitter levels; GO:0001654 eye development; GO:0001956 positive regulation of neurotransmitter secretion; GO:0003008 system process; GO:0006996 organelle organization; GO:0007154 cell communication; GO:0007165 signal transduction; GO:0007166 cell surface receptor signaling pathway; GO:0007267 cell-cell signaling; GO:0007268 chemical synaptic transmission; GO:0007…	GO:0005622 intracellular; GO:0005623 cell; GO:0005737 cytoplasm; GO:0005783 endoplasmic reticulum; GO:0005789 endoplasmic reticulum membrane; GO:0005794 Golgi apparatus; GO:0005811 lipid droplet; GO:0005829 cytosol; GO:0012505 endomembrane system; GO:0016020 membrane; GO:0031984 organelle subcompartment; GO:0032991 protein-containing complex; GO:0042175 nuclear outer membrane-endoplasmic reticulu…	GO:0005085 guanyl-nucleotide exchange factor activity; GO:0005096 GTPase activator activity; GO:0005488 binding; GO:0005515 protein binding; GO:0008047 enzyme activator activity; GO:0017016 Ras GTPase binding; GO:0017137 Rab GTPase binding; GO:0019899 enzyme binding; GO:0030234 enzyme regulator activity; GO:0030695 GTPase regulator activity; GO:0031267 small GTPase binding; GO:0051020 GTPase bind…
Q53GG5	PDZ and LIM domain protein 3 OS=Homo sapiens OX=9606 GN=PDLIM3 PE=1 SV=1	PDLIM3	9	2	16	2	2	39.2	948828		382066	2.91574e+06	2.60724e+06	3.35551e+06		232250	178939	930363	520466	308541	402093		443514	0.733		1.281	4.093	2.38	3.908		0.236	0.296	0.783	0.577	0.179	0.223		0.515	0.162	0.000820472	cytoplasm,nucleus	K23353				GO:0005622 intracellular; GO:0005623 cell; GO:0005737 cytoplasm; GO:0030016 myofibril; GO:0030017 sarcomere; GO:0030018 Z disc; GO:0031674 I band; GO:0043226 organelle; GO:0043228 non-membrane-bounded organelle; GO:0043229 intracellular organelle; GO:0043232 intracellular non-membrane-bounded organelle; GO:0043292 contractile fiber; GO:0099080 supramolecular complex; GO:0099081 supramolecular pol…	GO:0005488 binding; GO:0005515 protein binding; GO:0008092 cytoskeletal protein binding; GO:0042805 actinin binding;	PF00595; PF00412	PDZ domain (Also known as DHR or GLGF); LIM domain
Q9HBH5	Retinol dehydrogenase 14 OS=Homo sapiens OX=9606 GN=RDH14 PE=1 SV=1	RDH14	12	4	26	4	4	36.8	1.24131e+06	256873		1.50723e+06	2.83622e+06	1.61311e+06	574501	423667	192732	941120	667471	1.32772e+06	618629	1.72299e+06	1.45327e+06	0.962	0.616		2.123	2.598	1.885	0.657	0.432	0.32	0.794	0.743	0.773	0.344	1.393	1.692	0.485	0.0420243	mitochondria	K11162			GO:0001523 retinoid metabolic process; GO:0006066 alcohol metabolic process; GO:0006629 lipid metabolic process; GO:0006720 isoprenoid metabolic process; GO:0006721 terpenoid metabolic process; GO:0008152 metabolic process; GO:0009987 cellular process; GO:0010817 regulation of hormone levels; GO:0016101 diterpenoid metabolic process; GO:0034308 primary alcohol metabolic process; GO:0034754 cellul…	GO:0005622 intracellular; GO:0005623 cell; GO:0005737 cytoplasm; GO:0005783 endoplasmic reticulum; GO:0005789 endoplasmic reticulum membrane; GO:0012505 endomembrane system; GO:0016020 membrane; GO:0031984 organelle subcompartment; GO:0042175 nuclear outer membrane-endoplasmic reticulum membrane network; GO:0043226 organelle; GO:0043227 membrane-bounded organelle; GO:0043229 intracellular organel…	GO:0003824 catalytic activity; GO:0004033 aldo-keto reductase (NADP) activity; GO:0008106 alcohol dehydrogenase (NADP+) activity; GO:0016491 oxidoreductase activity; GO:0016614 oxidoreductase activity, acting on CH-OH group of donors; GO:0016616 oxidoreductase activity, acting on the CH-OH group of donors, NAD or NADP as acceptor; GO:0052650 NADP-retinol dehydrogenase activity;	PF00106	short chain dehydrogenase
P62877	E3 ubiquitin-protein ligase RBX1 OS=Homo sapiens OX=9606 GN=RBX1 PE=1 SV=1	RBX1	7	1	12	1	1	12.3	1.13764e+06	729247	705105	2.93367e+06	3.53332e+06	3.18774e+06	1503938	2.50268e+06	1.00192e+06	2800721	1.86171e+06	2.83237e+06	5.38363e+06	4.13973e+06	2382805																		extracellular	K03868	RBX1; E3 ubiquitin-protein ligase RBX1 [EC:2.3.2.32]	hsa05170 Human immunodeficiency virus 1 infection; hsa05211 Renal cell carcinoma; hsa04350 TGF-beta signaling pathway; hsa03420 Nucleotide excision repair; hsa05200 Pathways in cancer; hsa05131 Shigellosis; hsa04310 Wnt signaling pathway; hsa04066 HIF-1 signaling pathway; hsa04710 Circadian rhythm; hsa04110 Cell cycle; hsa04120 Ubiquitin mediated proteolysis; hsa04141 Protein processing in endopl…	GO:0000165 MAPK cascade; GO:0000209 protein polyubiquitination; GO:0000715 nucleotide-excision repair, DNA damage recognition; GO:0001666 response to hypoxia; GO:0006139 nucleobase-containing compound metabolic process; GO:0006259 DNA metabolic process; GO:0006281 DNA repair; GO:0006283 transcription-coupled nucleotide-excision repair; GO:0006289 nucleotide-excision repair; GO:0006293 nucleotide-…	GO:0000151 ubiquitin ligase complex; GO:0000152 nuclear ubiquitin ligase complex; GO:0000153 cytoplasmic ubiquitin ligase complex; GO:0005622 intracellular; GO:0005623 cell; GO:0005634 nucleus; GO:0005654 nucleoplasm; GO:0005680 anaphase-promoting complex; GO:0005737 cytoplasm; GO:0005829 cytosol; GO:0019005 SCF ubiquitin ligase complex; GO:0030891 VCB complex; GO:0031461 cullin-RING ubiquitin li…	GO:0003824 catalytic activity; GO:0004842 ubiquitin-protein transferase activity; GO:0005488 binding; GO:0005515 protein binding; GO:0008134 transcription factor binding; GO:0008190 eukaryotic initiation factor 4E binding; GO:0016740 transferase activity; GO:0019787 ubiquitin-like protein transferase activity; GO:0019788 NEDD8 transferase activity; GO:0019899 enzyme binding; GO:0031369 translatio…	PF12678	RING-H2 zinc finger
Q8IUD2	ELKS/Rab6-interacting/CAST family member 1 OS=Homo sapiens OX=9606 GN=ERC1 PE=1 SV=1	ERC1	3	4	16	4	4	128	4.13687e+06			164158	1.81092e+06	357571	665799	907103	252699	2.68058e+06	1.29884e+06	1.85742e+06	3.81994e+06	1.20808e+06	339798	2.348			0.169	1.215	0.306	0.558	0.677	0.307	1.657	1.058	0.792	1.557	0.715	0.29	0.838	0.827322	nucleus	K16072	ERC1; ELKS/RAB6-interacting/CAST family member 1	hsa04064 NF-kappa B signaling pathway	GO:0006355 regulation of transcription, DNA-templated; GO:0006464 cellular protein modification process; GO:0006468 protein phosphorylation; GO:0006793 phosphorus metabolic process; GO:0006796 phosphate-containing compound metabolic process; GO:0006807 nitrogen compound metabolic process; GO:0006810 transport; GO:0007154 cell communication; GO:0007165 signal transduction; GO:0007249 I-kappaB kina…	GO:0005622 intracellular; GO:0005623 cell; GO:0005737 cytoplasm; GO:0005829 cytosol; GO:0005886 plasma membrane; GO:0008385 IkappaB kinase complex; GO:0016020 membrane; GO:0032991 protein-containing complex; GO:0042734 presynaptic membrane; GO:0045202 synapse; GO:0061695 transferase complex, transferring phosphorus-containing groups; GO:0071944 cell periphery; GO:0097060 synaptic membrane; GO:009…	GO:0005488 binding; GO:0005515 protein binding; GO:0017016 Ras GTPase binding; GO:0017137 Rab GTPase binding; GO:0019899 enzyme binding; GO:0019904 protein domain specific binding; GO:0030165 PDZ domain binding; GO:0030275 LRR domain binding; GO:0031267 small GTPase binding; GO:0043522 leucine zipper domain binding; GO:0051020 GTPase binding;
Q96AH8	Ras-related protein Rab-7b OS=Homo sapiens OX=9606 GN=RAB7B PE=1 SV=1	RAB7B	7	1	1	1	1	22.5		231240	236660		234762	212777		297204	139677	283594		276390	344349	341420	205854																		cytoplasm	K07898	RAB7B; Ras-related protein Rab-7B	hsa05132 Salmonella infection; hsa04145 Phagosome; hsa05146 Amoebiasis; hsa04137 Mitophagy - animal; hsa04140 Autophagy - animal	GO:0001817 regulation of cytokine production; GO:0001819 positive regulation of cytokine production; GO:0002376 immune system process; GO:0002682 regulation of immune system process; GO:0002683 negative regulation of immune system process; GO:0002684 positive regulation of immune system process; GO:0006355 regulation of transcription, DNA-templated; GO:0006810 transport; GO:0006950 response to st…	GO:0000323 lytic vacuole; GO:0005622 intracellular; GO:0005623 cell; GO:0005737 cytoplasm; GO:0005764 lysosome; GO:0005768 endosome; GO:0005770 late endosome; GO:0005773 vacuole; GO:0005794 Golgi apparatus; GO:0005802 trans-Golgi network; GO:0010008 endosome membrane; GO:0012505 endomembrane system; GO:0016020 membrane; GO:0030139 endocytic vesicle; GO:0031090 organelle membrane; GO:0031410 cytop…		PF00071	Ras family
P61006	Ras-related protein Rab-8A OS=Homo sapiens OX=9606 GN=RAB8A PE=1 SV=1	RAB8A	38	8	98	3	3	23.7	9.55576e+06	9.52442e+06	3097595	5.35238e+06	8.10537e+06	4.05717e+06	6.02626e+06	3.84927e+06	4.02949e+06	4.91357e+06	6.46219e+06	1.40996e+07	1.28821e+07	1.1739e+07	8.58094e+06	1.087	3.351	1.53	1.106	1.09	0.696	1.012	0.575	0.983	0.609	1.055	1.205	1.052	1.392	1.466	0.703	0.252353	cytoplasm	K07901	RAB8A; Ras-related protein Rab-8A	hsa04972 Pancreatic secretion; hsa04140 Autophagy - animal; hsa05022 Pathways of neurodegeneration - multiple diseases; hsa05014 Amyotrophic lateral sclerosis; hsa04144 Endocytosis; hsa04152 AMPK signaling pathway; hsa04530 Tight junction	GO:0000902 cell morphogenesis; GO:0000904 cell morphogenesis involved in differentiation; GO:0002790 peptide secretion; GO:0006464 cellular protein modification process; GO:0006807 nitrogen compound metabolic process; GO:0006810 transport; GO:0006886 intracellular protein transport; GO:0006887 exocytosis; GO:0006904 vesicle docking involved in exocytosis; GO:0006906 vesicle fusion; GO:0006996 org…	GO:0000139 Golgi membrane; GO:0005622 intracellular; GO:0005623 cell; GO:0005737 cytoplasm; GO:0005768 endosome; GO:0005794 Golgi apparatus; GO:0005798 Golgi-associated vesicle; GO:0005802 trans-Golgi network; GO:0005813 centrosome; GO:0005815 microtubule organizing center; GO:0005829 cytosol; GO:0005856 cytoskeleton; GO:0005886 plasma membrane; GO:0005929 cilium; GO:0008021 synaptic vesicle; GO:…	GO:0000166 nucleotide binding; GO:0001882 nucleoside binding; GO:0001883 purine nucleoside binding; GO:0003824 catalytic activity; GO:0003924 GTPase activity; GO:0005488 binding; GO:0005515 protein binding; GO:0005525 GTP binding; GO:0008092 cytoskeletal protein binding; GO:0016462 pyrophosphatase activity; GO:0016787 hydrolase activity; GO:0016817 hydrolase activity, acting on acid anhydrides; G…	PF00071	Ras family
Q9Y263	Phospholipase A-2-activating protein OS=Homo sapiens OX=9606 GN=PLAA PE=1 SV=2	PLAA	14	9	30	9	9	87.1	9.68854e+06	1.80829e+06	3.46892e+06	3.4532e+06	2.80453e+06	3.09346e+06	3.25747e+06	3.38636e+06	5.06323e+06	5.29716e+06	3.63106e+06	1.05087e+07	7.51688e+06	5.37331e+06	3.28915e+06	1.727	0.997	2.684	1.119	0.591	0.831	0.857	0.793	1.935	1.028	0.929	1.407	0.962	0.999	0.881	0.821	0.609388	mitochondria	K14018	PLAA; phospholipase A-2-activating protein	hsa04141 Protein processing in endoplasmic reticulum	GO:0001558 regulation of cell growth; GO:0002237 response to molecule of bacterial origin; GO:0006082 organic acid metabolic process; GO:0006508 proteolysis; GO:0006511 ubiquitin-dependent protein catabolic process; GO:0006629 lipid metabolic process; GO:0006631 fatty acid metabolic process; GO:0006644 phospholipid metabolic process; GO:0006690 icosanoid metabolic process; GO:0006692 prostanoid m…	GO:0005576 extracellular region; GO:0005615 extracellular space; GO:0005622 intracellular; GO:0005623 cell; GO:0005634 nucleus; GO:0005737 cytoplasm; GO:0031982 vesicle; GO:0043226 organelle; GO:0043227 membrane-bounded organelle; GO:0043229 intracellular organelle; GO:0043230 extracellular organelle; GO:0043231 intracellular membrane-bounded organelle; GO:0045202 synapse; GO:0070062 extracellula…	GO:0005488 binding; GO:0005515 protein binding; GO:0008047 enzyme activator activity; GO:0016004 phospholipase activator activity; GO:0016005 phospholipase A2 activator activity; GO:0030234 enzyme regulator activity; GO:0032182 ubiquitin-like protein binding; GO:0043130 ubiquitin binding; GO:0060229 lipase activator activity; GO:0098772 molecular function regulator;	PF09070; PF08324	PFU (PLAA family ubiquitin binding); PUL domain
Q9NRX1	RNA-binding protein PNO1 OS=Homo sapiens OX=9606 GN=PNO1 PE=1 SV=1	PNO1	19	4	7	4	4	27.9	238093				262430			233329			190986	701031	637982	594069	252960	0.521				0.679			0.671			0.6	1.153	1.003	1.356	0.832	1.56	0.141181	cytoplasm	K11884				GO:0005622 intracellular; GO:0005623 cell; GO:0005634 nucleus; GO:0005654 nucleoplasm; GO:0005730 nucleolus; GO:0005737 cytoplasm; GO:0005829 cytosol; GO:0031974 membrane-enclosed lumen; GO:0031981 nuclear lumen; GO:0043226 organelle; GO:0043227 membrane-bounded organelle; GO:0043228 non-membrane-bounded organelle; GO:0043229 intracellular organelle; GO:0043231 intracellular membrane-bounded orga…
P51153	Ras-related protein Rab-13 OS=Homo sapiens OX=9606 GN=RAB13 PE=1 SV=1	RAB13	28	6	75	3	3	22.8	4.2118e+06	553764	1.10472e+06	1.09669e+06	713037	734744	2.07537e+06	674051	571181	2.38384e+06	2.05595e+06	1.63045e+06	1.11534e+06	1.50872e+06	779239	2.536	1.031	2.888	1.2	0.507	0.667	1.845	0.533	0.737	1.563	1.777	0.738	0.482	0.947	0.705	0.704	0.403293	cytoplasm	K06109	RAB13; Ras-related protein Rab-13	hsa04530 Tight junction	GO:0000003 reproduction; GO:0001667 ameboidal-type cell migration; GO:0002064 epithelial cell development; GO:0003006 developmental process involved in reproduction; GO:0006464 cellular protein modification process; GO:0006807 nitrogen compound metabolic process; GO:0006810 transport; GO:0006928 movement of cell or subcellular component; GO:0006935 chemotaxis; GO:0006996 organelle organization; G…	GO:0005622 intracellular; GO:0005623 cell; GO:0005737 cytoplasm; GO:0005768 endosome; GO:0005794 Golgi apparatus; GO:0005802 trans-Golgi network; GO:0005829 cytosol; GO:0005886 plasma membrane; GO:0005911 cell-cell junction; GO:0005923 bicellular tight junction; GO:0012505 endomembrane system; GO:0016020 membrane; GO:0016328 lateral plasma membrane; GO:0030027 lamellipodium; GO:0030054 cell junct…	GO:0000166 nucleotide binding; GO:0001882 nucleoside binding; GO:0001883 purine nucleoside binding; GO:0005488 binding; GO:0005525 GTP binding; GO:0017076 purine nucleotide binding; GO:0019001 guanyl nucleotide binding; GO:0032549 ribonucleoside binding; GO:0032550 purine ribonucleoside binding; GO:0032553 ribonucleotide binding; GO:0032555 purine ribonucleotide binding; GO:0032561 guanyl ribonuc…	PF00071	Ras family
P00747	Plasminogen OS=Homo sapiens OX=9606 GN=PLG PE=1 SV=2	PLG	49	31	336	31	31	90.5	3.78459e+07	5.30952e+07	5.32785e+07	1.52677e+08	1.26166e+08	5.96204e+07	5.16381e+07	5.7117e+07	3.89184e+07	5.08245e+07	6.68919e+07	6.34247e+07	5.33826e+07	8.95064e+07	3.78198e+07	0.487	2.114	2.977	3.571	1.919	1.157	0.981	0.966	1.074	0.712	1.236	0.613	0.493	1.201	0.731	0.437	0.0242963	extracellular	K01315	PLG; plasminogen [EC:3.4.21.7]	hsa04080 Neuroactive ligand-receptor interaction; hsa04610 Complement and coagulation cascades; hsa05150 Staphylococcus aureus infection; hsa05164 Influenza A	GO:0000003 reproduction; GO:0001568 blood vessel development; GO:0001701 in utero embryonic development; GO:0001890 placenta development; GO:0001892 embryonic placenta development; GO:0001944 vasculature development; GO:0002376 immune system process; GO:0002576 platelet degranulation; GO:0003006 developmental process involved in reproduction; GO:0006508 proteolysis; GO:0006807 nitrogen compound m…	GO:0005576 extracellular region; GO:0005615 extracellular space; GO:0005622 intracellular; GO:0005623 cell; GO:0005737 cytoplasm; GO:0005886 plasma membrane; GO:0009897 external side of plasma membrane; GO:0009986 cell surface; GO:0012505 endomembrane system; GO:0016020 membrane; GO:0019897 extrinsic component of plasma membrane; GO:0019898 extrinsic component of membrane; GO:0030141 secretory gr…	GO:0003823 antigen binding; GO:0003824 catalytic activity; GO:0004175 endopeptidase activity; GO:0004252 serine-type endopeptidase activity; GO:0005102 signaling receptor binding; GO:0005488 binding; GO:0005515 protein binding; GO:0008233 peptidase activity; GO:0008236 serine-type peptidase activity; GO:0016787 hydrolase activity; GO:0017171 serine hydrolase activity; GO:0019899 enzyme binding; G…	PF00024; PF00051; PF00089	PAN domain; Kringle domain; Trypsin
Q99541	Perilipin-2 OS=Homo sapiens OX=9606 GN=PLIN2 PE=1 SV=2	PLIN2	19	6	11	6	6	48	9.4358e+06	1.66227e+06	629124		2.23316e+06	1.64857e+06	1.0965e+06	372047	1.30996e+06	862751	1.44337e+06	1.92805e+06	3.16077e+06	690395	1257244	4.056	2.21	1.174		1.134	1.068	0.696	0.21	1.207	0.404	0.891	0.623	0.976	0.309	0.812	0.353	0.00811922	mitochondria	K17284	PLIN2; perilipin-2	hsa03320 PPAR signaling pathway	GO:0006810 transport; GO:0006811 ion transport; GO:0006820 anion transport; GO:0006869 lipid transport; GO:0010876 lipid localization; GO:0015711 organic anion transport; GO:0015718 monocarboxylic acid transport; GO:0015849 organic acid transport; GO:0015908 fatty acid transport; GO:0015909 long-chain fatty acid transport; GO:0019216 regulation of lipid metabolic process; GO:0019222 regulation of…	GO:0005576 extracellular region; GO:0005622 intracellular; GO:0005623 cell; GO:0005634 nucleus; GO:0005737 cytoplasm; GO:0005783 endoplasmic reticulum; GO:0005811 lipid droplet; GO:0005829 cytosol; GO:0005886 plasma membrane; GO:0012505 endomembrane system; GO:0016020 membrane; GO:0043226 organelle; GO:0043227 membrane-bounded organelle; GO:0043228 non-membrane-bounded organelle; GO:0043229 intra…
O15162	Phospholipid scramblase 1 OS=Homo sapiens OX=9606 GN=PLSCR1 PE=1 SV=1	PLSCR1	9	2	6	2	2	35	433797		339350					872420			425705		2.04258e+06	1.33265e+06		0.407		1.382					1.075			0.573		1.376	1.303		1.209	0.550986	cytoplasm				GO:0001775 cell activation; GO:0002252 immune effector process; GO:0002376 immune system process; GO:0002526 acute inflammatory response; GO:0002682 regulation of immune system process; GO:0002684 positive regulation of immune system process; GO:0002694 regulation of leukocyte activation; GO:0006139 nucleobase-containing compound metabolic process; GO:0006351 transcription, DNA-templated; GO:0006…	GO:0005576 extracellular region; GO:0005622 intracellular; GO:0005623 cell; GO:0005634 nucleus; GO:0005730 nucleolus; GO:0005737 cytoplasm; GO:0005794 Golgi apparatus; GO:0005829 cytosol; GO:0005886 plasma membrane; GO:0005887 integral component of plasma membrane; GO:0012505 endomembrane system; GO:0016020 membrane; GO:0016021 integral component of membrane; GO:0031012 extracellular matrix; GO:0…	GO:0000981 DNA-binding transcription factor activity, RNA polymerase II-specific; GO:0001228 DNA-binding transcription activator activity, RNA polymerase II-specific; GO:0003700 DNA-binding transcription factor activity; GO:0005102 signaling receptor binding; GO:0005154 epidermal growth factor receptor binding; GO:0005215 transporter activity; GO:0005319 lipid transporter activity; GO:0005488 bin…	PF03803	Scramblase
O43566	Regulator of G-protein signaling 14 OS=Homo sapiens OX=9606 GN=RGS14 PE=1 SV=4	RGS14	3	2	4	2	2	61.4			421874	252292	258456	141447	99170.7	86721.1	95356.2	3.2186e+06	223924	200600	2.01128e+06	562349	116694			2.636	0.66	0.44	0.307	0.211	0.164	0.294	5.046	0.463	0.217	2.079	0.844	0.252	1.052	0.649406	nucleus	K17706	RGS14; regulator of G-protein signaling 14	hsa04015 Rap1 signaling pathway	GO:0000226 microtubule cytoskeleton organization; GO:0000278 mitotic cell cycle; GO:0001932 regulation of protein phosphorylation; GO:0001933 negative regulation of protein phosphorylation; GO:0003008 system process; GO:0006355 regulation of transcription, DNA-templated; GO:0006469 negative regulation of protein kinase activity; GO:0006810 transport; GO:0006913 nucleocytoplasmic transport; GO:000…	GO:0000922 spindle pole; GO:0005622 intracellular; GO:0005623 cell; GO:0005634 nucleus; GO:0005654 nucleoplasm; GO:0005737 cytoplasm; GO:0005813 centrosome; GO:0005815 microtubule organizing center; GO:0005819 spindle; GO:0005856 cytoskeleton; GO:0005886 plasma membrane; GO:0014069 postsynaptic density; GO:0015630 microtubule cytoskeleton; GO:0016020 membrane; GO:0016604 nuclear body; GO:0030425 …	GO:0001965 G-protein alpha-subunit binding; GO:0005092 GDP-dissociation inhibitor activity; GO:0005096 GTPase activator activity; GO:0005198 structural molecule activity; GO:0005488 binding; GO:0005515 protein binding; GO:0008017 microtubule binding; GO:0008047 enzyme activator activity; GO:0008092 cytoskeletal protein binding; GO:0015631 tubulin binding; GO:0019899 enzyme binding; GO:0019900 kin…	PF00615; PF02196	Regulator of G protein signaling domain; Raf-like Ras-binding domain
O14495	Phospholipid phosphatase 3 OS=Homo sapiens OX=9606 GN=PLPP3 PE=1 SV=1	PLPP3	7	2	23	2	2	35.1	1.01314e+06		11973480	13194314	1.50092e+07	8.72417e+06	461411	433808		1.02459e+06	2643127	1.49566e+06	861126	2.50041e+06	3.10486e+06	0.18		9.214	4.25	3.144	2.332	0.121	0.101		0.198	0.673	0.199	0.11	0.462	0.827	0.088	0.005631	plasma membrane	K01080	PLPP1_2_3; phosphatidate phosphatase [EC:3.1.3.4]	hsa04666 Fc gamma R-mediated phagocytosis; hsa00600 Sphingolipid metabolism; hsa04072 Phospholipase D signaling pathway; hsa04975 Fat digestion and absorption; hsa05231 Choline metabolism in cancer; hsa00565 Ether lipid metabolism; hsa00561 Glycerolipid metabolism; hsa01100 Metabolic pathways; hsa00564 Glycerophospholipid metabolism	GO:0000003 reproduction; GO:0001568 blood vessel development; GO:0001702 gastrulation with mouth forming second; GO:0001932 regulation of protein phosphorylation; GO:0001933 negative regulation of protein phosphorylation; GO:0001934 positive regulation of protein phosphorylation; GO:0001944 vasculature development; GO:0006355 regulation of transcription, DNA-templated; GO:0006464 cellular protein…	GO:0000139 Golgi membrane; GO:0005622 intracellular; GO:0005623 cell; GO:0005737 cytoplasm; GO:0005783 endoplasmic reticulum; GO:0005789 endoplasmic reticulum membrane; GO:0005794 Golgi apparatus; GO:0005802 trans-Golgi network; GO:0005886 plasma membrane; GO:0005887 integral component of plasma membrane; GO:0005912 adherens junction; GO:0012505 endomembrane system; GO:0016020 membrane; GO:001602…	GO:0003824 catalytic activity; GO:0004721 phosphoprotein phosphatase activity; GO:0005102 signaling receptor binding; GO:0005178 integrin binding; GO:0005488 binding; GO:0005515 protein binding; GO:0008195 phosphatidate phosphatase activity; GO:0016787 hydrolase activity; GO:0016788 hydrolase activity, acting on ester bonds; GO:0016791 phosphatase activity; GO:0042392 sphingosine-1-phosphate phos…
A1L390	Pleckstrin homology domain-containing family G member 3 OS=Homo sapiens OX=9606 GN=PLEKHG3 PE=1 SV=1	PLEKHG3	1	1	1	1	1	134.3	222910						250671	318832		339502		603993	358282	189570																			nucleus	K23859						PF00621; PF00169	RhoGEF domain; PH domain
P01833	Polymeric immunoglobulin receptor OS=Homo sapiens OX=9606 GN=PIGR PE=1 SV=4	PIGR	6	4	6	4	4	83.2		887996	4491228	228242	719708	5.03941e+06	335590			63034.6	695116		94106.6	120882	1.51404e+06		1.813	12.868	0.274	0.561	5.015	0.327			0.045	0.659		0.045	0.083	1.501	0.108	0.039402	plasma membrane	K13073	PIGR; polymeric immunoglobulin receptor	hsa04672 Intestinal immune network for IgA production	GO:0001580 detection of chemical stimulus involved in sensory perception of bitter taste; GO:0001775 cell activation; GO:0002251 organ or tissue specific immune response; GO:0002252 immune effector process; GO:0002263 cell activation involved in immune response; GO:0002274 myeloid leukocyte activation; GO:0002275 myeloid cell activation involved in immune response; GO:0002283 neutrophil activatio…	GO:0000323 lytic vacuole; GO:0005576 extracellular region; GO:0005615 extracellular space; GO:0005622 intracellular; GO:0005623 cell; GO:0005737 cytoplasm; GO:0005764 lysosome; GO:0005765 lysosomal membrane; GO:0005766 primary lysosome; GO:0005768 endosome; GO:0005773 vacuole; GO:0005774 vacuolar membrane; GO:0005886 plasma membrane; GO:0005887 integral component of plasma membrane; GO:0010008 en…	GO:0001792 polymeric immunoglobulin receptor activity; GO:0004888 transmembrane signaling receptor activity; GO:0005102 signaling receptor binding; GO:0005154 epidermal growth factor receptor binding; GO:0005488 binding; GO:0005515 protein binding; GO:0019763 immunoglobulin receptor activity; GO:0038023 signaling receptor activity; GO:0060089 molecular transducer activity; GO:0070851 growth facto…	PF07686	Immunoglobulin V-set domain
P40937	Replication factor C subunit 5 OS=Homo sapiens OX=9606 GN=RFC5 PE=1 SV=1	RFC5	9	2	5	2	2	38.5	1.02164e+07			823012	761252	448003		275731			379895	2.32135e+06	833512	1107247	1.04138e+06	4.777			0.699	0.421	0.316		0.169			0.255	0.816	0.28	0.54	0.731	0.299	0.25031	cytoplasm	K10756	RFC3_5; replication factor C subunit 3/5	hsa03030 DNA replication; hsa03420 Nucleotide excision repair; hsa03430 Mismatch repair	GO:0000723 telomere maintenance; GO:0000731 DNA synthesis involved in DNA repair; GO:0006139 nucleobase-containing compound metabolic process; GO:0006259 DNA metabolic process; GO:0006260 DNA replication; GO:0006261 DNA-dependent DNA replication; GO:0006275 regulation of DNA replication; GO:0006281 DNA repair; GO:0006283 transcription-coupled nucleotide-excision repair; GO:0006289 nucleotide-exci…	GO:0005622 intracellular; GO:0005623 cell; GO:0005634 nucleus; GO:0005654 nucleoplasm; GO:0005657 replication fork; GO:0005663 DNA replication factor C complex; GO:0005694 chromosome; GO:0031390 Ctf18 RFC-like complex; GO:0031974 membrane-enclosed lumen; GO:0031981 nuclear lumen; GO:0032991 protein-containing complex; GO:0043226 organelle; GO:0043227 membrane-bounded organelle; GO:0043228 non-mem…	GO:0005488 binding; GO:0005515 protein binding; GO:0019899 enzyme binding;	PF00004; PF08542	ATPase family associated with various cellular activities (AAA); Replication factor C C-terminal domain
Q04864	Proto-oncogene c-Rel OS=Homo sapiens OX=9606 GN=REL PE=1 SV=1	REL	4	2	3	2	2	68.5	389993			98155.1	142683	111089	200075		205946	287928	147186	458926		323379	201234	1.423			0.651	0.615	0.611	1.078		1.611	1.144	0.771	1.258		1.23	1.103	1.419	0.0605609	nucleus	K09254	REL; c-Rel proto-oncogene protein	hsa04014 Ras signaling pathway; hsa05203 Viral carcinogenesis; hsa05202 Transcriptional misregulation in cancer	GO:0000122 negative regulation of transcription by RNA polymerase II; GO:0001816 cytokine production; GO:0001817 regulation of cytokine production; GO:0001818 negative regulation of cytokine production; GO:0001819 positive regulation of cytokine production; GO:0002376 immune system process; GO:0006139 nucleobase-containing compound metabolic process; GO:0006351 transcription, DNA-templated; GO:00…	GO:0005622 intracellular; GO:0005623 cell; GO:0005634 nucleus; GO:0005654 nucleoplasm; GO:0005667 transcription regulator complex; GO:0005737 cytoplasm; GO:0005829 cytosol; GO:0031974 membrane-enclosed lumen; GO:0031981 nuclear lumen; GO:0032991 protein-containing complex; GO:0033256 I-kappaB/NF-kappaB complex; GO:0043226 organelle; GO:0043227 membrane-bounded organelle; GO:0043229 intracellular …	GO:0000976 transcription regulatory region sequence-specific DNA binding; GO:0000977 RNA polymerase II transcription regulatory region sequence-specific DNA binding; GO:0000981 DNA-binding transcription factor activity, RNA polymerase II-specific; GO:0001067 regulatory region nucleic acid binding; GO:0001228 DNA-binding transcription activator activity, RNA polymerase II-specific; GO:0003676 nucl…	PF00554	Rel homology domain (RHD)
P27694	Replication protein A 70 kDa DNA-binding subunit OS=Homo sapiens OX=9606 GN=RPA1 PE=1 SV=2	RPA1	23	12	99	12	12	68.1	9.19534e+06	2.27902e+06	5.48655e+06	7.94296e+06	1.43373e+07	1.19944e+07	5.59136e+06	1.04338e+07	4.94203e+06	6.83296e+06	8.80862e+06	1.86396e+07	1.55503e+07	1.24651e+07	9.35376e+06	0.816	0.626	2.114	1.281	1.504	1.605	0.733	1.217	0.941	0.661	1.123	1.243	0.991	1.154	1.247	0.781	0.303375	cytoplasm	K07466	RFA1; replication factor A1	hsa03030 DNA replication; hsa03460 Fanconi anemia pathway; hsa03440 Homologous recombination; hsa03420 Nucleotide excision repair; hsa03430 Mismatch repair	GO:0000003 reproduction; GO:0000082 G1/S transition of mitotic cell cycle; GO:0000278 mitotic cell cycle; GO:0000723 telomere maintenance; GO:0000724 double-strand break repair via homologous recombination; GO:0000725 recombinational repair; GO:0000731 DNA synthesis involved in DNA repair; GO:0001701 in utero embryonic development; GO:0001894 tissue homeostasis; GO:0002376 immune system process; …	GO:0000228 nuclear chromosome; GO:0000793 condensed chromosome; GO:0000794 condensed nuclear chromosome; GO:0000795 synaptonemal complex; GO:0000800 lateral element; GO:0001673 male germ cell nucleus; GO:0005622 intracellular; GO:0005623 cell; GO:0005634 nucleus; GO:0005654 nucleoplasm; GO:0005657 replication fork; GO:0005662 DNA replication factor A complex; GO:0005694 chromosome; GO:0016604 nuc…	GO:0003676 nucleic acid binding; GO:0003677 DNA binding; GO:0003682 chromatin binding; GO:0003684 damaged DNA binding; GO:0003697 single-stranded DNA binding; GO:0005488 binding; GO:0042162 telomeric DNA binding; GO:0043047 single-stranded telomeric DNA binding; GO:0043565 sequence-specific DNA binding; GO:0097159 organic cyclic compound binding; GO:0098505 G-rich strand telomeric DNA binding; GO…	PF04057; PF01336	Replication factor-A protein 1, N-terminal domain; OB-fold nucleic acid binding domain
Q6WKZ4	Rab11 family-interacting protein 1 OS=Homo sapiens OX=9606 GN=RAB11FIP1 PE=1 SV=3	RAB11FIP1	4	4	6	4	4	137.1	2.06625e+06	4.05096e+06	740308	1.48749e+06	1.03544e+06	1.6958e+06	3.78778e+06	1.19302e+06	2068607	3.96675e+06	1.53188e+06	1.96521e+06	526792	793381	767518	0.953	5.782	1.483	1.247	0.565	1.18	2.58	0.723	2.046	1.993	1.015	0.681	0.175	0.382	0.532	0.602	0.275088	nucleus	K12484	RAB11FIP1_2_5; Rab11 family-interacting protein 1/2/5	hsa04144 Endocytosis	GO:0002791 regulation of peptide secretion; GO:0002792 negative regulation of peptide secretion; GO:0006810 transport; GO:0006887 exocytosis; GO:0009987 cellular process; GO:0010646 regulation of cell communication; GO:0010648 negative regulation of cell communication; GO:0010817 regulation of hormone levels; GO:0016192 vesicle-mediated transport; GO:0023051 regulation of signaling; GO:0023057 ne…	GO:0005622 intracellular; GO:0005623 cell; GO:0005737 cytoplasm; GO:0005829 cytosol; GO:0012506 vesicle membrane; GO:0016020 membrane; GO:0030139 endocytic vesicle; GO:0030659 cytoplasmic vesicle membrane; GO:0030666 endocytic vesicle membrane; GO:0030670 phagocytic vesicle membrane; GO:0031090 organelle membrane; GO:0031410 cytoplasmic vesicle; GO:0031982 vesicle; GO:0043226 organelle; GO:004322…	GO:0005488 binding; GO:0005515 protein binding; GO:0017016 Ras GTPase binding; GO:0017137 Rab GTPase binding; GO:0019899 enzyme binding; GO:0031267 small GTPase binding; GO:0051020 GTPase binding;	PF00168	C2 domain
O43251	RNA binding protein fox-1 homolog 2 OS=Homo sapiens OX=9606 GN=RBFOX2 PE=1 SV=3	RBFOX2	6	2	7	2	2	41.3	816899						232838	434163		546213	278290	493339	970803	547197		1.288						0.542	0.899		0.938	0.63	0.584	1.099	0.9		0.62		nucleus	K14946			GO:0000381 regulation of alternative mRNA splicing, via spliceosome; GO:0000902 cell morphogenesis; GO:0000904 cell morphogenesis involved in differentiation; GO:0002682 regulation of immune system process; GO:0003008 system process; GO:0006139 nucleobase-containing compound metabolic process; GO:0006355 regulation of transcription, DNA-templated; GO:0006725 cellular aromatic compound metabolic p…	GO:0005622 intracellular; GO:0005623 cell; GO:0005634 nucleus; GO:0005654 nucleoplasm; GO:0005737 cytoplasm; GO:0005829 cytosol; GO:0031974 membrane-enclosed lumen; GO:0031981 nuclear lumen; GO:0043226 organelle; GO:0043227 membrane-bounded organelle; GO:0043229 intracellular organelle; GO:0043231 intracellular membrane-bounded organelle; GO:0043233 organelle lumen; GO:0070013 intracellular organ…	GO:0003676 nucleic acid binding; GO:0003712 transcription coregulator activity; GO:0003714 transcription corepressor activity; GO:0003723 RNA binding; GO:0003729 mRNA binding; GO:0005488 binding; GO:0005515 protein binding; GO:0008134 transcription factor binding; GO:0097159 organic cyclic compound binding; GO:0140110 transcription regulator activity; GO:1901363 heterocyclic compound binding;	PF00076	RNA recognition motif. (a.k.a. RRM, RBD, or RNP domain)
P48634	Protein PRRC2A OS=Homo sapiens OX=9606 GN=PRRC2A PE=1 SV=3	PRRC2A	4	5	10	4	4	228.7	148780		514148	382078	1.13612e+06	412317					336017	103180		725546	338264	0.278		4.175	1.299	2.512	1.163					0.902	0.145		1.415	0.95	0.452	0.320916	nucleus				GO:0009987 cellular process; GO:0030154 cell differentiation; GO:0032502 developmental process; GO:0048869 cellular developmental process;	GO:0005622 intracellular; GO:0005623 cell; GO:0005634 nucleus; GO:0005654 nucleoplasm; GO:0005737 cytoplasm; GO:0005829 cytosol; GO:0005886 plasma membrane; GO:0016020 membrane; GO:0031974 membrane-enclosed lumen; GO:0031981 nuclear lumen; GO:0043226 organelle; GO:0043227 membrane-bounded organelle; GO:0043229 intracellular organelle; GO:0043231 intracellular membrane-bounded organelle; GO:004323…
O43447	Peptidyl-prolyl cis-trans isomerase H OS=Homo sapiens OX=9606 GN=PPIH PE=1 SV=1	PPIH	25	5	54	5	5	19.2	5.74552e+06	753302		2.25577e+06	5.31559e+06	3.48968e+06	7.60516e+06	9.51383e+06	2.4208e+06	5.12711e+06	3.98199e+06	1.23389e+07	8.26456e+06	5.00594e+06	3.33123e+06	0.911	0.37		0.65	0.996	0.835	1.781	1.983	0.823	0.886	0.907	1.47	0.941	0.828	0.793	1.538	0.0647727	cytoplasm	K09567	PPIH; peptidyl-prolyl isomerase H (cyclophilin H) [EC:5.2.1.8]	hsa03040 Spliceosome	GO:0000375 RNA splicing, via transesterification reactions; GO:0000377 RNA splicing, via transesterification reactions with bulged adenosine as nucleophile; GO:0000398 mRNA splicing, via spliceosome; GO:0000413 protein peptidyl-prolyl isomerization; GO:0006139 nucleobase-containing compound metabolic process; GO:0006396 RNA processing; GO:0006397 mRNA processing; GO:0006457 protein folding; GO:00…	GO:0005622 intracellular; GO:0005623 cell; GO:0005634 nucleus; GO:0005654 nucleoplasm; GO:0005681 spliceosomal complex; GO:0005737 cytoplasm; GO:0016604 nuclear body; GO:0016607 nuclear speck; GO:0030532 small nuclear ribonucleoprotein complex; GO:0031974 membrane-enclosed lumen; GO:0031981 nuclear lumen; GO:0032991 protein-containing complex; GO:0043226 organelle; GO:0043227 membrane-bounded org…	GO:0003755 peptidyl-prolyl cis-trans isomerase activity; GO:0003824 catalytic activity; GO:0005488 binding; GO:0008144 drug binding; GO:0016018 cyclosporin A binding; GO:0016853 isomerase activity; GO:0016859 cis-trans isomerase activity; GO:0033218 amide binding; GO:0042277 peptide binding; GO:0043021 ribonucleoprotein complex binding; GO:0044877 protein-containing complex binding; GO:0140096 ca…	PF00160	Cyclophilin type peptidyl-prolyl cis-trans isomerase/CLD
P55036	26S proteasome non-ATPase regulatory subunit 4 OS=Homo sapiens OX=9606 GN=PSMD4 PE=1 SV=1	PSMD4	32	8	65	8	8	40.7	1.14051e+07	1.82429e+06	523148	2.19395e+06	5.84895e+06	4.8251e+06	6.86642e+06	1.42185e+07	7.17893e+06	5.43336e+07	5.22019e+06	1.86896e+07	2.03233e+07	8.75546e+06	7.46984e+06	0.858	0.425	0.171	0.3	0.52	0.548	0.763	1.406	1.158	4.454	0.564	1.057	1.098	0.687	0.844	2.842	0.00843607	cytoskeleton	K03029	PSMD4; 26S proteasome regulatory subunit N10	hsa05017 Spinocerebellar ataxia; hsa05016 Huntington disease; hsa03050 Proteasome; hsa05169 Epstein-Barr virus infection; hsa05012 Parkinson disease; hsa05010 Alzheimer disease; hsa05022 Pathways of neurodegeneration - multiple diseases; hsa05014 Amyotrophic lateral sclerosis; hsa05020 Prion disease	GO:0006464 cellular protein modification process; GO:0006508 proteolysis; GO:0006511 ubiquitin-dependent protein catabolic process; GO:0006807 nitrogen compound metabolic process; GO:0008152 metabolic process; GO:0009056 catabolic process; GO:0009057 macromolecule catabolic process; GO:0009987 cellular process; GO:0010498 proteasomal protein catabolic process; GO:0016043 cellular component organi…	GO:0000502 proteasome complex; GO:0005622 intracellular; GO:0005623 cell; GO:0005634 nucleus; GO:0005654 nucleoplasm; GO:0005737 cytoplasm; GO:0005829 cytosol; GO:0005838 proteasome regulatory particle; GO:0008540 proteasome regulatory particle, base subcomplex; GO:0022624 proteasome accessory complex; GO:0031974 membrane-enclosed lumen; GO:0031981 nuclear lumen; GO:0032991 protein-containing com…	GO:0005488 binding; GO:0005515 protein binding; GO:0031593 polyubiquitin modification-dependent protein binding; GO:0042802 identical protein binding; GO:0140030 modification-dependent protein binding;	PF13519	von Willebrand factor type A domain
P83881	60S ribosomal protein L36a OS=Homo sapiens OX=9606 GN=RPL36A PE=1 SV=2	RPL36A	25	3	7	1	2	12.4	3.64825e+06	1.67507e+06	1.18335e+06	5214132	9.09995e+06	6.43316e+06				5505022	2.39847e+06	1.4494e+07	1.02864e+07	1.0307e+07	895040																		extracellular	K02929	RP-L44e; large subunit ribosomal protein L44e	hsa03010 Ribosome; hsa05171 Coronavirus disease - COVID-19	GO:0000184 nuclear-transcribed mRNA catabolic process, nonsense-mediated decay; GO:0000956 nuclear-transcribed mRNA catabolic process; GO:0002181 cytoplasmic translation; GO:0006139 nucleobase-containing compound metabolic process; GO:0006401 RNA catabolic process; GO:0006402 mRNA catabolic process; GO:0006412 translation; GO:0006413 translational initiation; GO:0006518 peptide metabolic process;…	GO:0005622 intracellular; GO:0005623 cell; GO:0005737 cytoplasm; GO:0005783 endoplasmic reticulum; GO:0005829 cytosol; GO:0005840 ribosome; GO:0005844 polysome; GO:0005886 plasma membrane; GO:0012505 endomembrane system; GO:0015934 large ribosomal subunit; GO:0016020 membrane; GO:0022625 cytosolic large ribosomal subunit; GO:0022626 cytosolic ribosome; GO:0032991 protein-containing complex; GO:00…	GO:0003735 structural constituent of ribosome; GO:0005198 structural molecule activity;
P10646	Tissue factor pathway inhibitor OS=Homo sapiens OX=9606 GN=TFPI PE=1 SV=1	TFPI	10	2	2	2	2	35		112831		281528	235657	116081	188559	91191.6		66184.2	302599	120133	128912				1.808		2.65	1.443	0.907	1.442	0.621		0.373	2.25	0.468	0.479			0.552	0.100488	extracellular	K03909	TFPI; tissue factor pathway inhibitor	hsa04610 Complement and coagulation cascades	GO:0002237 response to molecule of bacterial origin; GO:0006807 nitrogen compound metabolic process; GO:0006950 response to stress; GO:0007596 blood coagulation; GO:0007598 blood coagulation, extrinsic pathway; GO:0007599 hemostasis; GO:0008152 metabolic process; GO:0009605 response to external stimulus; GO:0009607 response to biotic stimulus; GO:0009611 response to wounding; GO:0009617 response …	GO:0005576 extracellular region; GO:0005615 extracellular space; GO:0005623 cell; GO:0005886 plasma membrane; GO:0005901 caveola; GO:0009986 cell surface; GO:0016020 membrane; GO:0044853 plasma membrane raft; GO:0045121 membrane raft; GO:0071944 cell periphery; GO:0098589 membrane region; GO:0098590 plasma membrane region; GO:0098805 whole membrane; GO:0098857 membrane microdomain;	GO:0004857 enzyme inhibitor activity; GO:0004866 endopeptidase inhibitor activity; GO:0030234 enzyme regulator activity; GO:0030414 peptidase inhibitor activity; GO:0061134 peptidase regulator activity; GO:0061135 endopeptidase regulator activity; GO:0098772 molecular function regulator;	PF00014	Kunitz/Bovine pancreatic trypsin inhibitor domain
A4D1P6	WD repeat-containing protein 91 OS=Homo sapiens OX=9606 GN=WDR91 PE=1 SV=2	WDR91	4	3	18	3	3	83.3	1.65197e+06			745286	904689	1.02026e+06		508950		955370	596066	1.70075e+06	1.61234e+06	1.16362e+06	885998	1.317			1.08	0.853	1.227		0.533		0.83	0.682	1.019	0.923	0.968	1.061	0.768	0.089489	nucleus	K24760			GO:0006810 transport; GO:0009894 regulation of catabolic process; GO:0016192 vesicle-mediated transport; GO:0016482 cytosolic transport; GO:0019216 regulation of lipid metabolic process; GO:0019220 regulation of phosphate metabolic process; GO:0019222 regulation of metabolic process; GO:0031323 regulation of cellular metabolic process; GO:0031329 regulation of cellular catabolic process; GO:00322…	GO:0005622 intracellular; GO:0005623 cell; GO:0005737 cytoplasm; GO:0005768 endosome; GO:0005769 early endosome; GO:0005770 late endosome; GO:0005829 cytosol; GO:0010008 endosome membrane; GO:0012505 endomembrane system; GO:0016020 membrane; GO:0019898 extrinsic component of membrane; GO:0031090 organelle membrane; GO:0031312 extrinsic component of organelle membrane; GO:0031313 extrinsic compone…	GO:0019207 kinase regulator activity; GO:0030234 enzyme regulator activity; GO:0035014 phosphatidylinositol 3-kinase regulator activity; GO:0098772 molecular function regulator;
P42765	3-ketoacyl-CoA thiolase, mitochondrial OS=Homo sapiens OX=9606 GN=ACAA2 PE=1 SV=2	ACAA2	19	6	75	6	6	41.9	2.63906e+07	7.01239e+06	926829	8.54108e+06	3.00322e+07	1.94926e+07	9.42872e+06	5.03702e+06	2.45239e+06	1.03675e+07	1.36127e+07	1.50675e+07	11959939	1.10634e+07	8.23577e+06	1.876	1.542	0.286	1.104	2.523	2.09	0.99	0.471	0.374	0.803	1.389	0.805	0.611	0.82	0.879	0.505	0.0909426	mitochondria	K07508	ACAA2; acetyl-CoA acyltransferase 2 [EC:2.3.1.16]	hsa00062 Fatty acid elongation; hsa00071 Fatty acid degradation; hsa00280 Valine, leucine and isoleucine degradation; hsa01212 Fatty acid metabolism; hsa01100 Metabolic pathways	GO:0001666 response to hypoxia; GO:0006066 alcohol metabolic process; GO:0006082 organic acid metabolic process; GO:0006084 acetyl-CoA metabolic process; GO:0006139 nucleobase-containing compound metabolic process; GO:0006163 purine nucleotide metabolic process; GO:0006629 lipid metabolic process; GO:0006631 fatty acid metabolic process; GO:0006635 fatty acid beta-oxidation; GO:0006637 acyl-CoA m…	GO:0005622 intracellular; GO:0005623 cell; GO:0005737 cytoplasm; GO:0005739 mitochondrion; GO:0005759 mitochondrial matrix; GO:0031974 membrane-enclosed lumen; GO:0043226 organelle; GO:0043227 membrane-bounded organelle; GO:0043229 intracellular organelle; GO:0043231 intracellular membrane-bounded organelle; GO:0043233 organelle lumen; GO:0070013 intracellular organelle lumen;	GO:0003824 catalytic activity; GO:0003988 acetyl-CoA C-acyltransferase activity; GO:0016408 C-acyltransferase activity; GO:0016740 transferase activity; GO:0016746 transferase activity, transferring acyl groups; GO:0016747 transferase activity, transferring acyl groups other than amino-acyl groups;	PF00108; PF02803	Thiolase, N-terminal domain; Thiolase, C-terminal domain
Q99426	Tubulin-folding cofactor B OS=Homo sapiens OX=9606 GN=TBCB PE=1 SV=2	TBCB	30	7	66	7	7	27.3	1.44946e+07		716045	6.81398e+06	1.18239e+07	5.19574e+06	6.62482e+06	7.39298e+06	2.16777e+06	9.08991e+06	7.10647e+06	9.84486e+06	1.72415e+07	1.3821e+07	8.36122e+06	1.431		0.307	1.223	1.38	0.774	0.966	0.959	0.459	0.978	1.007	0.73	1.223	1.423	1.24	0.976	0.805969	extracellular	K17262				GO:0005622 intracellular; GO:0005623 cell; GO:0005737 cytoplasm; GO:0005829 cytosol; GO:0005856 cytoskeleton; GO:0015630 microtubule cytoskeleton; GO:0043226 organelle; GO:0043228 non-membrane-bounded organelle; GO:0043229 intracellular organelle; GO:0043232 intracellular non-membrane-bounded organelle;		PF01302	CAP-Gly domain
P15374	Ubiquitin carboxyl-terminal hydrolase isozyme L3 OS=Homo sapiens OX=9606 GN=UCHL3 PE=1 SV=1	UCHL3	37	6	49	6	6	26.2	8.61321e+06	1.54697e+06	1.30898e+06	2.34659e+06	6.98683e+06	3.66385e+06	3.92884e+06	1.04231e+07	2.83896e+06	6.62481e+06	6.51927e+06	1.04412e+07	1.51777e+07	9.24022e+06	7.44926e+06	1.133	0.629	0.747	0.561	1.086	0.726	0.763	1.801	0.8	0.949	1.231	1.032	1.433	1.267	1.471	1.468	0.0262268	cytoplasm	K05609			GO:0001654 eye development; GO:0006464 cellular protein modification process; GO:0006508 proteolysis; GO:0006807 nitrogen compound metabolic process; GO:0007275 multicellular organism development; GO:0007423 sensory organ development; GO:0007610 behavior; GO:0007626 locomotory behavior; GO:0007628 adult walking behavior; GO:0007631 feeding behavior; GO:0008152 metabolic process; GO:0008344 adult …	GO:0005622 intracellular; GO:0005623 cell; GO:0005634 nucleus; GO:0005737 cytoplasm; GO:0005829 cytosol; GO:0043226 organelle; GO:0043227 membrane-bounded organelle; GO:0043229 intracellular organelle; GO:0043231 intracellular membrane-bounded organelle;	GO:0003824 catalytic activity; GO:0004843 thiol-dependent ubiquitin-specific protease activity; GO:0005488 binding; GO:0005515 protein binding; GO:0008233 peptidase activity; GO:0008234 cysteine-type peptidase activity; GO:0016787 hydrolase activity; GO:0019783 ubiquitin-like protein-specific protease activity; GO:0019784 NEDD8-specific protease activity; GO:0032182 ubiquitin-like protein binding…	PF01088	Ubiquitin carboxyl-terminal hydrolase, family 1
Q9UPU5	Ubiquitin carboxyl-terminal hydrolase 24 OS=Homo sapiens OX=9606 GN=USP24 PE=1 SV=3	USP24	2	5	14	5	5	294.2	1.5147e+06	1.56849e+06	1.28412e+06	1.05297e+06	1.54382e+06	644314	1.43957e+06	713685	1.98939e+06	2.05257e+06	810331	1.8475e+06	2.66196e+06	854553	558201	0.942	3.017	3.467	1.19	1.135	0.604	1.322	0.583	2.652	1.39	0.723	0.863	1.189	0.554	0.521	0.631	0.225155	cytoplasm	K11840			GO:0006464 cellular protein modification process; GO:0006508 proteolysis; GO:0006807 nitrogen compound metabolic process; GO:0008152 metabolic process; GO:0009987 cellular process; GO:0016579 protein deubiquitination; GO:0019538 protein metabolic process; GO:0036211 protein modification process; GO:0043170 macromolecule metabolic process; GO:0043412 macromolecule modification; GO:0044237 cellular…	GO:0005622 intracellular; GO:0005623 cell; GO:0005634 nucleus; GO:0005654 nucleoplasm; GO:0031974 membrane-enclosed lumen; GO:0031981 nuclear lumen; GO:0043226 organelle; GO:0043227 membrane-bounded organelle; GO:0043229 intracellular organelle; GO:0043231 intracellular membrane-bounded organelle; GO:0043233 organelle lumen; GO:0070013 intracellular organelle lumen;	GO:0003824 catalytic activity; GO:0008233 peptidase activity; GO:0008234 cysteine-type peptidase activity; GO:0016787 hydrolase activity; GO:0019783 ubiquitin-like protein-specific protease activity; GO:0036459 thiol-dependent ubiquitinyl hydrolase activity; GO:0070011 peptidase activity, acting on L-amino acid peptides; GO:0101005 ubiquitinyl hydrolase activity; GO:0140096 catalytic activity, ac…
P45974	Ubiquitin carboxyl-terminal hydrolase 5 OS=Homo sapiens OX=9606 GN=USP5 PE=1 SV=2	USP5	32	21	196	20	21	95.7	2.76683e+07	6.56563e+06	4.33611e+06	1.7428e+07	2.83288e+07	2.35684e+07	1.61845e+07	2.2383e+07	1.31259e+07	2.5689e+07	2.47148e+07	3.78198e+07	4.50086e+07	3.37856e+07	2.52784e+07	1.004	0.737	0.683	1.149	1.215	1.29	0.867	1.067	1.021	1.015	1.288	1.031	1.173	1.279	1.378	1.11	0.269503	nucleus	K11836			GO:0006464 cellular protein modification process; GO:0006508 proteolysis; GO:0006807 nitrogen compound metabolic process; GO:0008152 metabolic process; GO:0009893 positive regulation of metabolic process; GO:0009894 regulation of catabolic process; GO:0009896 positive regulation of catabolic process; GO:0009987 cellular process; GO:0010604 positive regulation of macromolecule metabolic process; G…	GO:0000323 lytic vacuole; GO:0005622 intracellular; GO:0005623 cell; GO:0005737 cytoplasm; GO:0005764 lysosome; GO:0005773 vacuole; GO:0005829 cytosol; GO:0043226 organelle; GO:0043227 membrane-bounded organelle; GO:0043229 intracellular organelle; GO:0043231 intracellular membrane-bounded organelle;	GO:0003824 catalytic activity; GO:0004175 endopeptidase activity; GO:0004197 cysteine-type endopeptidase activity; GO:0004843 thiol-dependent ubiquitin-specific protease activity; GO:0005488 binding; GO:0005515 protein binding; GO:0008233 peptidase activity; GO:0008234 cysteine-type peptidase activity; GO:0016787 hydrolase activity; GO:0019783 ubiquitin-like protein-specific protease activity; GO…	PF02148; PF00627	Zn-finger in ubiquitin-hydrolases and other protein; UBA/TS-N domain
P40818	Ubiquitin carboxyl-terminal hydrolase 8 OS=Homo sapiens OX=9606 GN=USP8 PE=1 SV=1	USP8	2	2	11	2	2	127.4	456208		36599.9		318344	290694	462550	500035	320497	542613	382339	1034197	857066	412242	230649	0.864		0.301		0.713	0.83	1.293	1.244	1.301	1.119	1.039	1.472	1.166	0.814	0.656	1.658	0.0191047	nucleus	K11839	USP8; ubiquitin carboxyl-terminal hydrolase 8 [EC:3.4.19.12]	hsa04137 Mitophagy - animal; hsa04934 Cushing syndrome; hsa04144 Endocytosis	GO:0000278 mitotic cell cycle; GO:0000281 mitotic cytokinesis; GO:0000910 cytokinesis; GO:0006464 cellular protein modification process; GO:0006508 proteolysis; GO:0006807 nitrogen compound metabolic process; GO:0006996 organelle organization; GO:0007032 endosome organization; GO:0007049 cell cycle; GO:0007154 cell communication; GO:0007165 signal transduction; GO:0007264 small GTPase mediated si…	GO:0005622 intracellular; GO:0005623 cell; GO:0005737 cytoplasm; GO:0005768 endosome; GO:0005769 early endosome; GO:0005829 cytosol; GO:0005886 plasma membrane; GO:0010008 endosome membrane; GO:0012505 endomembrane system; GO:0014069 postsynaptic density; GO:0016020 membrane; GO:0019897 extrinsic component of plasma membrane; GO:0019898 extrinsic component of membrane; GO:0030425 dendrite; GO:003…	GO:0003824 catalytic activity; GO:0004175 endopeptidase activity; GO:0004197 cysteine-type endopeptidase activity; GO:0004843 thiol-dependent ubiquitin-specific protease activity; GO:0008233 peptidase activity; GO:0008234 cysteine-type peptidase activity; GO:0016787 hydrolase activity; GO:0019783 ubiquitin-like protein-specific protease activity; GO:0036459 thiol-dependent ubiquitinyl hydrolase a…	PF08969; PF00581	Domain of unknown function (DUF1873); Rhodanese-like domain
Q86UV5	Ubiquitin carboxyl-terminal hydrolase 48 OS=Homo sapiens OX=9606 GN=USP48 PE=1 SV=1	USP48	1	1	1	1	1	119																																	nucleus	K11858				GO:0005622 intracellular; GO:0005623 cell; GO:0005634 nucleus; GO:0005654 nucleoplasm; GO:0005737 cytoplasm; GO:0005739 mitochondrion; GO:0005829 cytosol; GO:0031974 membrane-enclosed lumen; GO:0031981 nuclear lumen; GO:0043226 organelle; GO:0043227 membrane-bounded organelle; GO:0043229 intracellular organelle; GO:0043231 intracellular membrane-bounded organelle; GO:0043233 organelle lumen; GO:0…
Q16401	26S proteasome non-ATPase regulatory subunit 5 OS=Homo sapiens OX=9606 GN=PSMD5 PE=1 SV=3	PSMD5	34	16	167	16	16	56.2	2.30919e+07	1.11112e+07	3.21494e+06	1.46036e+07	3.57192e+07	2.22521e+07	2.81984e+07	2.85603e+07	1.47573e+07	2.55688e+07	2.4427e+07	6.90888e+07	6.2149e+07	2.62856e+07	2.20552e+07	0.717	1.068	0.434	0.824	1.311	1.042	1.293	1.166	0.983	0.865	1.089	1.613	1.386	0.852	1.029	1.27	0.0994535	cytoskeleton	K06692			GO:0006464 cellular protein modification process; GO:0006508 proteolysis; GO:0006807 nitrogen compound metabolic process; GO:0008152 metabolic process; GO:0009987 cellular process; GO:0016043 cellular component organization; GO:0016579 protein deubiquitination; GO:0019538 protein metabolic process; GO:0022607 cellular component assembly; GO:0034622 cellular protein-containing complex assembly; GO…	GO:0000502 proteasome complex; GO:0005622 intracellular; GO:0005623 cell; GO:0005634 nucleus; GO:0005654 nucleoplasm; GO:0005737 cytoplasm; GO:0005829 cytosol; GO:0005838 proteasome regulatory particle; GO:0008540 proteasome regulatory particle, base subcomplex; GO:0022624 proteasome accessory complex; GO:0031974 membrane-enclosed lumen; GO:0031981 nuclear lumen; GO:0032991 protein-containing com…
Q08257	Quinone oxidoreductase OS=Homo sapiens OX=9606 GN=CRYZ PE=1 SV=1	CRYZ	37	8	58	8	8	35.2	22084436	9.30105e+06	6.71549e+06	2.15483e+07	3.70085e+07	3.51189e+07	1.44559e+07	1.68414e+07	9.48773e+06	2.14696e+07	2.38846e+07	2.31489e+07	2.79032e+07	1.66751e+07	2.00924e+07	0.922	1.202	1.218	1.636	1.827	2.212	0.891	0.924	0.85	0.977	1.432	0.726	0.837	0.726	1.26	0.638	0.00931399	cytoplasm	K00344			GO:0003008 system process; GO:0006805 xenobiotic metabolic process; GO:0007600 sensory perception; GO:0007601 visual perception; GO:0008152 metabolic process; GO:0009056 catabolic process; GO:0009410 response to xenobiotic stimulus; GO:0009987 cellular process; GO:0016043 cellular component organization; GO:0022607 cellular component assembly; GO:0032501 multicellular organismal process; GO:00421…	GO:0005622 intracellular; GO:0005623 cell; GO:0005737 cytoplasm; GO:0005829 cytosol;	GO:0000166 nucleotide binding; GO:0003676 nucleic acid binding; GO:0003723 RNA binding; GO:0003729 mRNA binding; GO:0003730 mRNA 3'-UTR binding; GO:0003824 catalytic activity; GO:0003960 NADPH:quinone reductase activity; GO:0005198 structural molecule activity; GO:0005212 structural constituent of eye lens; GO:0005488 binding; GO:0016491 oxidoreductase activity; GO:0016651 oxidoreductase activity…	PF08240	Alcohol dehydrogenase GroES-like domain
P78332	RNA-binding protein 6 OS=Homo sapiens OX=9606 GN=RBM6 PE=1 SV=5	RBM6	3	4	7	3	3	128.6	460431				173630	220538	248463	200655	130701	355440	124917	463542	710556	279692	155776	1.335				0.595	0.964	1.063	0.764	0.812	1.122	0.52	1.01	1.479	0.845	0.678	0.955	0.878535	nucleus				GO:0006139 nucleobase-containing compound metabolic process; GO:0006396 RNA processing; GO:0006725 cellular aromatic compound metabolic process; GO:0006807 nitrogen compound metabolic process; GO:0008152 metabolic process; GO:0009987 cellular process; GO:0010467 gene expression; GO:0016070 RNA metabolic process; GO:0034641 cellular nitrogen compound metabolic process; GO:0043170 macromolecule met…	GO:0005622 intracellular; GO:0005623 cell; GO:0005634 nucleus; GO:0043226 organelle; GO:0043227 membrane-bounded organelle; GO:0043229 intracellular organelle; GO:0043231 intracellular membrane-bounded organelle;	GO:0003676 nucleic acid binding; GO:0003677 DNA binding; GO:0005488 binding; GO:0097159 organic cyclic compound binding; GO:1901363 heterocyclic compound binding;
Q13636	Ras-related protein Rab-31 OS=Homo sapiens OX=9606 GN=RAB31 PE=1 SV=1	RAB31	22	4	24	2	4	21.6	3.92452e+06	314544		1.1713e+06	1.09708e+06	916461	1.31808e+06	1.95803e+06	183870	2.86424e+06	2.07142e+06	2810452	3.78412e+06	2.29647e+06	1.22231e+06	1.804	0.447		0.978	0.596	0.635	0.894	1.182	0.181	1.434	1.367	0.971	1.249	1.101	0.844	1.149	0.672109	cytoplasm	K07891	RAB22; Ras-related protein Rab-22	hsa04144 Endocytosis	GO:0001775 cell activation; GO:0002252 immune effector process; GO:0002263 cell activation involved in immune response; GO:0002274 myeloid leukocyte activation; GO:0002275 myeloid cell activation involved in immune response; GO:0002283 neutrophil activation involved in immune response; GO:0002366 leukocyte activation involved in immune response; GO:0002376 immune system process; GO:0002443 leukoc…	GO:0000139 Golgi membrane; GO:0005622 intracellular; GO:0005623 cell; GO:0005737 cytoplasm; GO:0005768 endosome; GO:0005769 early endosome; GO:0005794 Golgi apparatus; GO:0005802 trans-Golgi network; GO:0005829 cytosol; GO:0005886 plasma membrane; GO:0010008 endosome membrane; GO:0012505 endomembrane system; GO:0012506 vesicle membrane; GO:0016020 membrane; GO:0030139 endocytic vesicle; GO:003014…	GO:0000166 nucleotide binding; GO:0001882 nucleoside binding; GO:0001883 purine nucleoside binding; GO:0003824 catalytic activity; GO:0003924 GTPase activity; GO:0005488 binding; GO:0005525 GTP binding; GO:0016462 pyrophosphatase activity; GO:0016787 hydrolase activity; GO:0016817 hydrolase activity, acting on acid anhydrides; GO:0016818 hydrolase activity, acting on acid anhydrides, in phosphoru…	PF00071	Ras family
Q13637	Ras-related protein Rab-32 OS=Homo sapiens OX=9606 GN=RAB32 PE=1 SV=3	RAB32	21	5	36	4	5	25	7.75249e+06	6.48035e+06	3.3186e+06	1.05059e+07	1.71465e+07	1.20747e+07	1.27687e+07	1.44529e+07	1.00745e+07	3.68401e+06	1.89483e+07	4.02211e+07	3.54842e+07	1.61139e+07	7.91528e+06	0.456	1.18	0.848	1.124	1.193	1.072	1.11	1.118	1.271	0.236	1.601	1.779	1.5	0.989	0.7	1.17	0.777922	cytoplasm	K07918			GO:0002376 immune system process; GO:0006810 transport; GO:0006996 organelle organization; GO:0007005 mitochondrion organization; GO:0008104 protein localization; GO:0009605 response to external stimulus; GO:0009987 cellular process; GO:0016043 cellular component organization; GO:0016050 vesicle organization; GO:0019882 antigen processing and presentation; GO:0021700 developmental maturation; GO:…	GO:0005622 intracellular; GO:0005623 cell; GO:0005737 cytoplasm; GO:0005739 mitochondrion; GO:0005740 mitochondrial envelope; GO:0005741 mitochondrial outer membrane; GO:0005768 endosome; GO:0005769 early endosome; GO:0005783 endoplasmic reticulum; GO:0005794 Golgi apparatus; GO:0005802 trans-Golgi network; GO:0005829 cytosol; GO:0012505 endomembrane system; GO:0012506 vesicle membrane; GO:001602…	GO:0000166 nucleotide binding; GO:0001882 nucleoside binding; GO:0001883 purine nucleoside binding; GO:0003824 catalytic activity; GO:0003924 GTPase activity; GO:0005488 binding; GO:0005515 protein binding; GO:0005525 GTP binding; GO:0016462 pyrophosphatase activity; GO:0016787 hydrolase activity; GO:0016817 hydrolase activity, acting on acid anhydrides; GO:0016818 hydrolase activity, acting on a…	PF00071	Ras family
Q9BYD6	39S ribosomal protein L1, mitochondrial OS=Homo sapiens OX=9606 GN=MRPL1 PE=1 SV=2	MRPL1	3	1	5	1	1	36.9	651313	488218	495625				603158	565460	341612	791480	824570	1.10658e+06	928249																				mitochondria	K02863	RP-L1; large subunit ribosomal protein L1	hsa03010 Ribosome	GO:0000154 rRNA modification; GO:0000469 cleavage involved in rRNA processing; GO:0000470 maturation of LSU-rRNA; GO:0001522 pseudouridine synthesis; GO:0006139 nucleobase-containing compound metabolic process; GO:0006364 rRNA processing; GO:0006396 RNA processing; GO:0006412 translation; GO:0006414 translational elongation; GO:0006415 translational termination; GO:0006518 peptide metabolic proce…	GO:0000313 organellar ribosome; GO:0000315 organellar large ribosomal subunit; GO:0005622 intracellular; GO:0005623 cell; GO:0005634 nucleus; GO:0005730 nucleolus; GO:0005732 small nucleolar ribonucleoprotein complex; GO:0005737 cytoplasm; GO:0005739 mitochondrion; GO:0005740 mitochondrial envelope; GO:0005743 mitochondrial inner membrane; GO:0005759 mitochondrial matrix; GO:0005761 mitochondrial…	GO:0003676 nucleic acid binding; GO:0003723 RNA binding; GO:0003735 structural constituent of ribosome; GO:0005198 structural molecule activity; GO:0005488 binding; GO:0030515 snoRNA binding; GO:0034513 box H/ACA snoRNA binding; GO:0097159 organic cyclic compound binding; GO:1901363 heterocyclic compound binding;	PF00687	Ribosomal protein L1p/L10e family
Q14242	P-selectin glycoprotein ligand 1 OS=Homo sapiens OX=9606 GN=SELPLG PE=1 SV=1	SELPLG	2	1	6	1	1	43.2	2.85334e+06			803186		871758	1.26823e+06	1.08901e+06	1.72049e+06	1.26608e+06	1.01263e+06		1.04604e+06	1.38509e+06	798916																		extracellular	K06544	SELPLG; selectin P ligand	hsa05150 Staphylococcus aureus infection; hsa04613 Neutrophil extracellular trap formation; hsa04514 Cell adhesion molecules	GO:0001775 cell activation; GO:0002376 immune system process; GO:0006928 movement of cell or subcellular component; GO:0007155 cell adhesion; GO:0007159 leukocyte cell-cell adhesion; GO:0009987 cellular process; GO:0010033 response to organic substance; GO:0016477 cell migration; GO:0022610 biological adhesion; GO:0034097 response to cytokine; GO:0040011 locomotion; GO:0042221 response to chemica…	GO:0001931 uropod; GO:0005623 cell; GO:0005886 plasma membrane; GO:0005887 integral component of plasma membrane; GO:0016020 membrane; GO:0016021 integral component of membrane; GO:0031224 intrinsic component of membrane; GO:0031226 intrinsic component of plasma membrane; GO:0031254 cell trailing edge; GO:0042995 cell projection; GO:0044853 plasma membrane raft; GO:0045121 membrane raft; GO:00719…	GO:0005102 signaling receptor binding; GO:0005488 binding; GO:0005515 protein binding;
P35542	Serum amyloid A-4 protein OS=Homo sapiens OX=9606 GN=SAA4 PE=1 SV=2	SAA4	33	4	57	4	4	14.7	25908407	7875624	4.36155e+06	4.34101e+07	4.03618e+07	2.64542e+07	6.21502e+06	1.53256e+07	6.03356e+06	1.03558e+07	1.04155e+07	2.51181e+07	10880296	2.84294e+07	1.70031e+07	1.189	1.119	0.869	3.622	2.19	1.831	0.421	0.925	0.594	0.518	0.686	0.866	0.359	1.361	1.172	0.425	0.00636165	extracellular	K17310			GO:0006928 movement of cell or subcellular component; GO:0006935 chemotaxis; GO:0009605 response to external stimulus; GO:0009966 regulation of signal transduction; GO:0009987 cellular process; GO:0010469 regulation of signaling receptor activity; GO:0010646 regulation of cell communication; GO:0016477 cell migration; GO:0023051 regulation of signaling; GO:0040011 locomotion; GO:0042221 response …	GO:0005576 extracellular region; GO:0005615 extracellular space;	GO:0005102 signaling receptor binding; GO:0005488 binding; GO:0005515 protein binding; GO:0030545 receptor regulator activity; GO:0042056 chemoattractant activity; GO:0048018 receptor ligand activity; GO:0098772 molecular function regulator;
P52434	DNA-directed RNA polymerases I, II, and III subunit RPABC3 OS=Homo sapiens OX=9606 GN=POLR2H PE=1 SV=4	POLR2H	16	2	11	2	2	17.1	2.83497e+06	2.78878e+06	3.38284e+06	1.6059e+06	2.90879e+06	2.0042e+06	959513	828747	1.14575e+06		2.07528e+06	4.36108e+06	4.59981e+06	3.9677e+06	2.9193e+06	0.929	2.826	4.811	0.956	1.126	0.99	0.464	0.357	0.805		0.976	1.073	1.082	1.355	1.436	0.486	0.0909632	cytoskeleton	K03016	RPB8; DNA-directed RNA polymerases I, II, and III subunit RPABC3	hsa05016 Huntington disease; hsa04623 Cytosolic DNA-sensing pathway; hsa03020 RNA polymerase	GO:0000375 RNA splicing, via transesterification reactions; GO:0000377 RNA splicing, via transesterification reactions with bulged adenosine as nucleophile; GO:0000398 mRNA splicing, via spliceosome; GO:0006139 nucleobase-containing compound metabolic process; GO:0006259 DNA metabolic process; GO:0006281 DNA repair; GO:0006283 transcription-coupled nucleotide-excision repair; GO:0006289 nucleotid…	GO:0000428 DNA-directed RNA polymerase complex; GO:0005622 intracellular; GO:0005623 cell; GO:0005634 nucleus; GO:0005654 nucleoplasm; GO:0005665 RNA polymerase II, core complex; GO:0005666 RNA polymerase III complex; GO:0005730 nucleolus; GO:0005736 RNA polymerase I complex; GO:0005737 cytoplasm; GO:0005829 cytosol; GO:0016591 RNA polymerase II, holoenzyme; GO:0030880 RNA polymerase complex; GO:…	GO:0003676 nucleic acid binding; GO:0003677 DNA binding; GO:0003697 single-stranded DNA binding; GO:0005488 binding; GO:0097159 organic cyclic compound binding; GO:1901363 heterocyclic compound binding;
P19387	DNA-directed RNA polymerase II subunit RPB3 OS=Homo sapiens OX=9606 GN=POLR2C PE=1 SV=2	POLR2C	5	1	8	1	1	31.4				187215	626511	392718								648352	491547																		cytoskeleton	K03011	RPB3; DNA-directed RNA polymerase II subunit RPB3	hsa05016 Huntington disease; hsa03020 RNA polymerase	GO:0000375 RNA splicing, via transesterification reactions; GO:0000377 RNA splicing, via transesterification reactions with bulged adenosine as nucleophile; GO:0000398 mRNA splicing, via spliceosome; GO:0006139 nucleobase-containing compound metabolic process; GO:0006259 DNA metabolic process; GO:0006281 DNA repair; GO:0006283 transcription-coupled nucleotide-excision repair; GO:0006289 nucleotid…	GO:0000428 DNA-directed RNA polymerase complex; GO:0005622 intracellular; GO:0005623 cell; GO:0005634 nucleus; GO:0005654 nucleoplasm; GO:0005665 RNA polymerase II, core complex; GO:0005737 cytoplasm; GO:0005829 cytosol; GO:0005856 cytoskeleton; GO:0015630 microtubule cytoskeleton; GO:0016591 RNA polymerase II, holoenzyme; GO:0030880 RNA polymerase complex; GO:0031974 membrane-enclosed lumen; GO:…		PF01193; PF01000	RNA polymerase Rpb3/Rpb11 dimerisation domain; RNA polymerase Rpb3/RpoA insert domain
Q9H2W6	39S ribosomal protein L46, mitochondrial OS=Homo sapiens OX=9606 GN=MRPL46 PE=1 SV=1	MRPL46	6	2	2	2	2	31.7	178790			2.06256e+06	2083952	1.74647e+06	797967	233407	100012	272473	556870	852611	755048	4.39724e+06	2.32853e+06	0.121			2.535	1.666	1.781	0.797	0.207	0.145	0.201	0.541	0.433	0.367	3.101	2.365	0.594	0.397129	mitochondria	K17427			GO:0006412 translation; GO:0006414 translational elongation; GO:0006415 translational termination; GO:0006518 peptide metabolic process; GO:0006807 nitrogen compound metabolic process; GO:0008152 metabolic process; GO:0009058 biosynthetic process; GO:0009059 macromolecule biosynthetic process; GO:0009987 cellular process; GO:0010467 gene expression; GO:0016043 cellular component organization; GO:…	GO:0000313 organellar ribosome; GO:0000315 organellar large ribosomal subunit; GO:0005622 intracellular; GO:0005623 cell; GO:0005634 nucleus; GO:0005654 nucleoplasm; GO:0005737 cytoplasm; GO:0005739 mitochondrion; GO:0005740 mitochondrial envelope; GO:0005743 mitochondrial inner membrane; GO:0005759 mitochondrial matrix; GO:0005761 mitochondrial ribosome; GO:0005762 mitochondrial large ribosomal …	GO:0003735 structural constituent of ribosome; GO:0005198 structural molecule activity;
Q63HN8	E3 ubiquitin-protein ligase RNF213 OS=Homo sapiens OX=9606 GN=RNF213 PE=1 SV=3	RNF213	8	33	125	33	33	591	5.67527e+07	3.36438e+07	4.62645e+06	7.47788e+07	8.74999e+07	5.97772e+07	5.39001e+07	3.03167e+07	2.57862e+07	9.26951e+07	4.02879e+07	2.47341e+07	7.8046e+07	4.53804e+07	1.97192e+07	0.996	1.826	0.352	2.384	1.814	1.581	1.396	0.699	0.97	1.771	1.015	0.326	0.983	0.83	0.52	0.634	0.210438	plasma membrane	K22754			GO:0000209 protein polyubiquitination; GO:0001525 angiogenesis; GO:0001568 blood vessel development; GO:0001944 vasculature development; GO:0002040 sprouting angiogenesis; GO:0006464 cellular protein modification process; GO:0006508 proteolysis; GO:0006511 ubiquitin-dependent protein catabolic process; GO:0006807 nitrogen compound metabolic process; GO:0007275 multicellular organism development; …	GO:0005622 intracellular; GO:0005623 cell; GO:0005634 nucleus; GO:0005730 nucleolus; GO:0005737 cytoplasm; GO:0005829 cytosol; GO:0031974 membrane-enclosed lumen; GO:0031981 nuclear lumen; GO:0043226 organelle; GO:0043227 membrane-bounded organelle; GO:0043228 non-membrane-bounded organelle; GO:0043229 intracellular organelle; GO:0043231 intracellular membrane-bounded organelle; GO:0043232 intrac…	GO:0003824 catalytic activity; GO:0004842 ubiquitin-protein transferase activity; GO:0016462 pyrophosphatase activity; GO:0016740 transferase activity; GO:0016787 hydrolase activity; GO:0016817 hydrolase activity, acting on acid anhydrides; GO:0016818 hydrolase activity, acting on acid anhydrides, in phosphorus-containing anhydrides; GO:0016887 ATPase activity; GO:0017111 nucleoside-triphosphatas…	PF00097	Zinc finger, C3HC4 type (RING finger)
Q7L523	Ras-related GTP-binding protein A OS=Homo sapiens OX=9606 GN=RRAGA PE=1 SV=1	RRAGA	19	6	14	6	6	36.5	2.24713e+06	268691		531284	426526	1.01468e+06	1.26294e+06	1.0229e+06	2.03775e+06	1.39407e+06	1.01255e+06	4.25849e+06	2.51005e+06	2.11511e+06	960282	1.272	0.47		0.546	0.285	0.866	1.055	0.761	2.472	0.859	0.823	1.811	1.02	1.248	0.816	1.755	0.0368871	mitochondria	K16185	RRAGA_B; Ras-related GTP-binding protein A/B	hsa04150 mTOR signaling pathway; hsa04140 Autophagy - animal; hsa05131 Shigellosis	GO:0001101 response to acid chemical; GO:0006464 cellular protein modification process; GO:0006807 nitrogen compound metabolic process; GO:0006950 response to stress; GO:0007049 cell cycle; GO:0007050 cell cycle arrest; GO:0007154 cell communication; GO:0008104 protein localization; GO:0008152 metabolic process; GO:0008219 cell death; GO:0009267 cellular response to starvation; GO:0009605 respons…	GO:0000323 lytic vacuole; GO:0005622 intracellular; GO:0005623 cell; GO:0005634 nucleus; GO:0005737 cytoplasm; GO:0005764 lysosome; GO:0005768 endosome; GO:0005773 vacuole; GO:0005774 vacuolar membrane; GO:0005829 cytosol; GO:0012505 endomembrane system; GO:0016020 membrane; GO:0031090 organelle membrane; GO:0031410 cytoplasmic vesicle; GO:0031982 vesicle; GO:0032991 protein-containing complex; G…	GO:0000166 nucleotide binding; GO:0001882 nucleoside binding; GO:0001883 purine nucleoside binding; GO:0003824 catalytic activity; GO:0003924 GTPase activity; GO:0005488 binding; GO:0005515 protein binding; GO:0005525 GTP binding; GO:0016462 pyrophosphatase activity; GO:0016787 hydrolase activity; GO:0016817 hydrolase activity, acting on acid anhydrides; GO:0016818 hydrolase activity, acting on a…	PF04670	Gtr1/RagA G protein conserved region
Q9P2W9	Syntaxin-18 OS=Homo sapiens OX=9606 GN=STX18 PE=1 SV=1	STX18	5	2	4	2	2	38.7	590000							130437		251628		1.24041e+06	1.12608e+06	70238.3		0.884							0.257		0.411		1.397	1.212	0.11		0.766		peroxisome	K08492	STX18; syntaxin 18	hsa04145 Phagosome; hsa04130 SNARE interactions in vesicular transport	GO:0006810 transport; GO:0006888 endoplasmic reticulum to Golgi vesicle-mediated transport; GO:0006890 retrograde vesicle-mediated transport, Golgi to endoplasmic reticulum; GO:0006996 organelle organization; GO:0007029 endoplasmic reticulum organization; GO:0009987 cellular process; GO:0010256 endomembrane system organization; GO:0010638 positive regulation of organelle organization; GO:0016043 …	GO:0005622 intracellular; GO:0005623 cell; GO:0005737 cytoplasm; GO:0005783 endoplasmic reticulum; GO:0005789 endoplasmic reticulum membrane; GO:0012505 endomembrane system; GO:0016020 membrane; GO:0031201 SNARE complex; GO:0031984 organelle subcompartment; GO:0032991 protein-containing complex; GO:0042175 nuclear outer membrane-endoplasmic reticulum membrane network; GO:0043226 organelle; GO:004…	GO:0005488 binding; GO:0005515 protein binding; GO:0019904 protein domain specific binding;	PF10496	SNARE-complex protein Syntaxin-18 N-terminus
P25398	40S ribosomal protein S12 OS=Homo sapiens OX=9606 GN=RPS12 PE=1 SV=3	RPS12	72	9	187	9	9	14.5	9.26027e+07	8.16877e+07	1.85311e+08	3.46539e+07	9.46328e+07	1.1719e+08	8.85165e+07	1.22599e+08	5.65368e+07	1.18138e+08	9.64743e+07	177900922	2.1743e+08	1.14425e+08	1.11901e+08	0.692	1.887	6.008	0.47	0.835	1.32	0.976	1.203	0.905	0.961	1.034	0.998	1.166	0.891	1.255	0.558	0.616362	cytoplasm	K02951	RP-S12e; small subunit ribosomal protein S12e	hsa03010 Ribosome; hsa05171 Coronavirus disease - COVID-19	GO:0000184 nuclear-transcribed mRNA catabolic process, nonsense-mediated decay; GO:0000956 nuclear-transcribed mRNA catabolic process; GO:0006139 nucleobase-containing compound metabolic process; GO:0006401 RNA catabolic process; GO:0006402 mRNA catabolic process; GO:0006412 translation; GO:0006413 translational initiation; GO:0006518 peptide metabolic process; GO:0006605 protein targeting; GO:00…	GO:0005622 intracellular; GO:0005623 cell; GO:0005634 nucleus; GO:0005654 nucleoplasm; GO:0005737 cytoplasm; GO:0005794 Golgi apparatus; GO:0005829 cytosol; GO:0005840 ribosome; GO:0012505 endomembrane system; GO:0015934 large ribosomal subunit; GO:0015935 small ribosomal subunit; GO:0022625 cytosolic large ribosomal subunit; GO:0022626 cytosolic ribosome; GO:0022627 cytosolic small ribosomal sub…	GO:0003735 structural constituent of ribosome; GO:0005198 structural molecule activity;	PF01248	Ribosomal protein L7Ae/L30e/S12e/Gadd45 family
Q71UM5	40S ribosomal protein S27-like OS=Homo sapiens OX=9606 GN=RPS27L PE=1 SV=3	RPS27L	23	2	26	1	1	9.5				774798	1.63152e+06	1091574	600473	798104		1.27422e+06	482465	2.4259e+06	1.90835e+06	972393	850239																		extracellular	K02978	RP-S27e; small subunit ribosomal protein S27e	hsa03010 Ribosome; hsa05171 Coronavirus disease - COVID-19	GO:0000028 ribosomal small subunit assembly; GO:0000075 cell cycle checkpoint; GO:0000077 DNA damage checkpoint; GO:0000278 mitotic cell cycle; GO:0006412 translation; GO:0006417 regulation of translation; GO:0006518 peptide metabolic process; GO:0006807 nitrogen compound metabolic process; GO:0006915 apoptotic process; GO:0006919 activation of cysteine-type endopeptidase activity involved in apo…	GO:0005622 intracellular; GO:0005623 cell; GO:0005634 nucleus; GO:0005737 cytoplasm; GO:0005829 cytosol; GO:0005840 ribosome; GO:0015935 small ribosomal subunit; GO:0022626 cytosolic ribosome; GO:0022627 cytosolic small ribosomal subunit; GO:0032991 protein-containing complex; GO:0043226 organelle; GO:0043227 membrane-bounded organelle; GO:0043228 non-membrane-bounded organelle; GO:0043229 intrac…	GO:0003676 nucleic acid binding; GO:0003735 structural constituent of ribosome; GO:0005198 structural molecule activity; GO:0005488 binding; GO:0008047 enzyme activator activity; GO:0008494 translation activator activity; GO:0008656 cysteine-type endopeptidase activator activity involved in apoptotic process; GO:0016504 peptidase activator activity; GO:0016505 peptidase activator activity involve…
Q9Y5B9	FACT complex subunit SPT16 OS=Homo sapiens OX=9606 GN=SUPT16H PE=1 SV=1	SUPT16H	14	13	90	13	13	119.8	1.54089e+07	9.93819e+06	3.88993e+06	9.01686e+06	1.71923e+07	2.50366e+07	2.76626e+08	9.17298e+06	4.67138e+08	1.32804e+07	3.05577e+08	5.55036e+08	8.1599e+08	8.3476e+08	5530879	0.059	0.117	0.064	0.062	0.077	0.143	1.551	0.046	3.802	0.055	1.665	1.583	2.225	3.305	0.032	18.217	0.0334217	nucleus				GO:0006139 nucleobase-containing compound metabolic process; GO:0006325 chromatin organization; GO:0006333 chromatin assembly or disassembly; GO:0006337 nucleosome disassembly; GO:0006351 transcription, DNA-templated; GO:0006354 DNA-templated transcription, elongation; GO:0006355 regulation of transcription, DNA-templated; GO:0006357 regulation of transcription by RNA polymerase II; GO:0006366 tr…	GO:0005622 intracellular; GO:0005623 cell; GO:0005634 nucleus; GO:0005654 nucleoplasm; GO:0005694 chromosome; GO:0008023 transcription elongation factor complex; GO:0031974 membrane-enclosed lumen; GO:0031981 nuclear lumen; GO:0032991 protein-containing complex; GO:0035101 FACT complex; GO:0043226 organelle; GO:0043227 membrane-bounded organelle; GO:0043228 non-membrane-bounded organelle; GO:0043…	GO:0003682 chromatin binding; GO:0005488 binding; GO:0005515 protein binding; GO:0031491 nucleosome binding; GO:0042393 histone binding; GO:0044877 protein-containing complex binding;	PF00557; PF08512	Metallopeptidase family M24; Histone chaperone Rttp106-like
Q15005	Signal peptidase complex subunit 2 OS=Homo sapiens OX=9606 GN=SPCS2 PE=1 SV=3	SPCS2	20	4	67	4	4	25	1.36083e+07	260421	1.2407e+06	5.36041e+06	7.71893e+06	7.64131e+06	1.03114e+07	7.04002e+06	1.53712e+06	1.19449e+07	10706558	9.86408e+06	1.35201e+07	6.73254e+06	8.84989e+06	1.494	0.088	0.591	1.069	1.001	1.265	1.671	1.015	0.362	1.428	1.687	0.814	1.066	0.771	1.459	1.243	0.317422	plasma membrane	K12947	SPCS2; signal peptidase complex subunit 2 [EC:3.4.-.-]	hsa03060 Protein export	GO:0006465 signal peptide processing; GO:0006508 proteolysis; GO:0006518 peptide metabolic process; GO:0006605 protein targeting; GO:0006807 nitrogen compound metabolic process; GO:0006810 transport; GO:0006886 intracellular protein transport; GO:0008104 protein localization; GO:0008152 metabolic process; GO:0009987 cellular process; GO:0010467 gene expression; GO:0015031 protein transport; GO:00…	GO:0005622 intracellular; GO:0005623 cell; GO:0005737 cytoplasm; GO:0005783 endoplasmic reticulum; GO:0005787 signal peptidase complex; GO:0005789 endoplasmic reticulum membrane; GO:0012505 endomembrane system; GO:0016020 membrane; GO:0031984 organelle subcompartment; GO:0032991 protein-containing complex; GO:0042175 nuclear outer membrane-endoplasmic reticulum membrane network; GO:0043226 organe…
Q9NTJ3	Structural maintenance of chromosomes protein 4 OS=Homo sapiens OX=9606 GN=SMC4 PE=1 SV=2	SMC4	2	3	5	3	3	147.1	4.62701e+06	624716	512046	624189	2.21945e+06	1.05347e+06	1.28102e+06	778445	738177	2474394	1.08238e+06	2.82188e+06	3.54682e+06	1.60634e+06	1.03776e+06	2.361	0.986	1.134	0.579	1.338	0.81	0.965	0.522	0.807	1.375	0.793	1.082	1.3	0.855	0.795	0.786	0.3811	nucleus	K06675			GO:0000003 reproduction; GO:0000012 single strand break repair; GO:0000070 mitotic sister chromatid segregation; GO:0000278 mitotic cell cycle; GO:0000280 nuclear division; GO:0000819 sister chromatid segregation; GO:0006139 nucleobase-containing compound metabolic process; GO:0006259 DNA metabolic process; GO:0006281 DNA repair; GO:0006323 DNA packaging; GO:0006725 cellular aromatic compound met…	GO:0000793 condensed chromosome; GO:0000796 condensin complex; GO:0005622 intracellular; GO:0005623 cell; GO:0005634 nucleus; GO:0005654 nucleoplasm; GO:0005694 chromosome; GO:0005737 cytoplasm; GO:0005829 cytosol; GO:0016604 nuclear body; GO:0016607 nuclear speck; GO:0031974 membrane-enclosed lumen; GO:0031981 nuclear lumen; GO:0032991 protein-containing complex; GO:0043226 organelle; GO:0043227…	GO:0000166 nucleotide binding; GO:0003676 nucleic acid binding; GO:0003677 DNA binding; GO:0003697 single-stranded DNA binding; GO:0005488 binding; GO:0005515 protein binding; GO:0005524 ATP binding; GO:0008144 drug binding; GO:0017076 purine nucleotide binding; GO:0030554 adenyl nucleotide binding; GO:0032553 ribonucleotide binding; GO:0032555 purine ribonucleotide binding; GO:0032559 adenyl rib…	PF02463; PF06470	RecF/RecN/SMC N terminal domain; SMC proteins Flexible Hinge Domain
P51532	Transcription activator BRG1 OS=Homo sapiens OX=9606 GN=SMARCA4 PE=1 SV=2	SMARCA4	7	10	53	4	4	184.5	1.19825e+06	262789	969952	2.21112e+06	1.74858e+06	1.4198e+06	573374	1.30967e+06	1.62934e+06	982652	1.45358e+06	2.09517e+06	1.72354e+06	2.56897e+06	1.45378e+06	0.708	0.481	2.489	2.376	1.222	1.266	0.5	1.017	2.065	0.633	1.234	0.931	0.732	1.584	1.291	0.779	0.548282	nucleus	K11647	SMARCA2_4; SWI/SNF-related matrix-associated actin-dependent regulator of chromatin subfamily A member 2/4 [EC:5.6.2.-]	hsa05225 Hepatocellular carcinoma; hsa04714 Thermogenesis	GO:0000122 negative regulation of transcription by RNA polymerase II; GO:0001188 RNA polymerase I preinitiation complex assembly; GO:0001558 regulation of cell growth; GO:0001654 eye development; GO:0003407 neural retina development; GO:0006139 nucleobase-containing compound metabolic process; GO:0006325 chromatin organization; GO:0006333 chromatin assembly or disassembly; GO:0006337 nucleosome d…	GO:0000228 nuclear chromosome; GO:0000785 chromatin; GO:0000790 nuclear chromatin; GO:0005622 intracellular; GO:0005623 cell; GO:0005634 nucleus; GO:0005654 nucleoplasm; GO:0005694 chromosome; GO:0005730 nucleolus; GO:0016514 SWI/SNF complex; GO:0031974 membrane-enclosed lumen; GO:0031981 nuclear lumen; GO:0032991 protein-containing complex; GO:0043226 organelle; GO:0043227 membrane-bounded organ…	GO:0000976 transcription regulatory region sequence-specific DNA binding; GO:0001046 core promoter sequence-specific DNA binding; GO:0001067 regulatory region nucleic acid binding; GO:0001163 RNA polymerase I transcription regulatory region sequence-specific DNA binding; GO:0001164 RNA polymerase I core promoter sequence-specific DNA binding; GO:0002039 p53 binding; GO:0003676 nucleic acid bindin…	PF08880; PF07529; PF07533; PF00439	QLQ; HSA; BRK domain; Bromodomain
Q8NBN3	Transmembrane protein 87A OS=Homo sapiens OX=9606 GN=TMEM87A PE=1 SV=3	TMEM87A	5	2	2	2	2	63.4	400115			837180	1.13299e+06		749921		515514	674532	457058	563172	519949	692881	533014	0.53			2.013	1.772		1.465		1.463	0.972	0.868	0.56	0.494	0.956	1.059	0.681	0.395132	plasma membrane				GO:0006810 transport; GO:0016192 vesicle-mediated transport; GO:0016197 endosomal transport; GO:0016482 cytosolic transport; GO:0042147 retrograde transport, endosome to Golgi; GO:0046907 intracellular transport; GO:0051179 localization; GO:0051234 establishment of localization; GO:0051641 cellular localization; GO:0051649 establishment of localization in cell;	GO:0000139 Golgi membrane; GO:0005622 intracellular; GO:0005623 cell; GO:0005737 cytoplasm; GO:0005794 Golgi apparatus; GO:0005795 Golgi stack; GO:0012505 endomembrane system; GO:0016020 membrane; GO:0031090 organelle membrane; GO:0031984 organelle subcompartment; GO:0031985 Golgi cisterna; GO:0032580 Golgi cisterna membrane; GO:0043226 organelle; GO:0043227 membrane-bounded organelle; GO:0043229…
P63208	S-phase kinase-associated protein 1 OS=Homo sapiens OX=9606 GN=SKP1 PE=1 SV=2	SKP1	17	3	25	3	3	18.6	7.7699e+06	1.438e+06		1.79307e+06	3.27827e+06	2725031	3928192	4.59389e+06		6911262	6663102	1.0692e+07	1.13012e+07	4.92414e+06	2459561	1.256	0.719		0.527	0.626	0.664	0.937	0.976		1.217	1.546	1.298	1.312	0.83	0.597	1.436	0.0633947	cytoplasm	K03094	SKP1; S-phase kinase-associated protein 1	hsa05170 Human immunodeficiency virus 1 infection; hsa04350 TGF-beta signaling pathway; hsa05200 Pathways in cancer; hsa05131 Shigellosis; hsa05132 Salmonella infection; hsa04310 Wnt signaling pathway; hsa04710 Circadian rhythm; hsa04110 Cell cycle; hsa04120 Ubiquitin mediated proteolysis; hsa04141 Protein processing in endoplasmic reticulum; hsa04114 Oocyte meiosis	GO:0006325 chromatin organization; GO:0006464 cellular protein modification process; GO:0006508 proteolysis; GO:0006511 ubiquitin-dependent protein catabolic process; GO:0006513 protein monoubiquitination; GO:0006807 nitrogen compound metabolic process; GO:0006996 organelle organization; GO:0008104 protein localization; GO:0008152 metabolic process; GO:0009056 catabolic process; GO:0009057 macrom…	GO:0000151 ubiquitin ligase complex; GO:0005622 intracellular; GO:0005623 cell; GO:0005634 nucleus; GO:0005654 nucleoplasm; GO:0005737 cytoplasm; GO:0005813 centrosome; GO:0005815 microtubule organizing center; GO:0005829 cytosol; GO:0005856 cytoskeleton; GO:0015630 microtubule cytoskeleton; GO:0019005 SCF ubiquitin ligase complex; GO:0031461 cullin-RING ubiquitin ligase complex; GO:0031467 Cul7-…	GO:0003824 catalytic activity; GO:0004842 ubiquitin-protein transferase activity; GO:0005488 binding; GO:0005515 protein binding; GO:0008013 beta-catenin binding; GO:0016740 transferase activity; GO:0019787 ubiquitin-like protein transferase activity; GO:0019904 protein domain specific binding; GO:0097602 cullin family protein binding; GO:0140096 catalytic activity, acting on a protein;	PF03931; PF01466	Skp1 family, tetramerisation domain; Skp1 family, dimerisation domain
Q15427	Splicing factor 3B subunit 4 OS=Homo sapiens OX=9606 GN=SF3B4 PE=1 SV=1	SF3B4	11	3	31	3	3	44.4	1.90984e+07	4.25839e+06	3.74146e+06	1.19907e+07	2.04915e+07	1.58521e+07	1.01161e+07	1.04247e+07	4.51735e+06	1.95707e+07	9.38668e+06	3.63218e+07	2.58718e+07	7.52482e+06	8.26208e+06	1.176	0.811	1	1.342	1.491	1.471	0.919	0.843	0.596	1.312	0.83	1.68	1.144	0.483	0.764	0.784	0.130013	nucleus	K12831	SF3B4; splicing factor 3B subunit 4	hsa03040 Spliceosome	GO:0009893 positive regulation of metabolic process; GO:0010468 regulation of gene expression; GO:0010604 positive regulation of macromolecule metabolic process; GO:0010628 positive regulation of gene expression; GO:0019219 regulation of nucleobase-containing compound metabolic process; GO:0019222 regulation of metabolic process; GO:0031323 regulation of cellular metabolic process; GO:0031325 pos…	GO:0005622 intracellular; GO:0005623 cell; GO:0005634 nucleus; GO:0005681 spliceosomal complex; GO:0005689 U12-type spliceosomal complex; GO:0032991 protein-containing complex; GO:0043226 organelle; GO:0043227 membrane-bounded organelle; GO:0043229 intracellular organelle; GO:0043231 intracellular membrane-bounded organelle; GO:1990904 ribonucleoprotein complex;		PF00076	RNA recognition motif. (a.k.a. RRM, RBD, or RNP domain)
O14656	Torsin-1A OS=Homo sapiens OX=9606 GN=TOR1A PE=1 SV=1	TOR1A	6	2	2	2	2	37.8	513736		466576				971918	690588		1.8217e+06			1.28072e+06	1.91568e+06	1.05813e+06	0.401		1.582				1.121	0.709		1.55			0.718	1.56	1.241	1.16	0.476497	endoplasmic reticulum	K22990			GO:0000338 protein deneddylation; GO:0001505 regulation of neurotransmitter levels; GO:0002009 morphogenesis of an epithelium; GO:0002011 morphogenesis of an epithelial sheet; GO:0006457 protein folding; GO:0006464 cellular protein modification process; GO:0006508 proteolysis; GO:0006515 protein quality control for misfolded or incompletely synthesized proteins; GO:0006807 nitrogen compound metab…	GO:0005622 intracellular; GO:0005623 cell; GO:0005634 nucleus; GO:0005635 nuclear envelope; GO:0005737 cytoplasm; GO:0005783 endoplasmic reticulum; GO:0005788 endoplasmic reticulum lumen; GO:0005789 endoplasmic reticulum membrane; GO:0005829 cytosol; GO:0005856 cytoskeleton; GO:0008021 synaptic vesicle; GO:0012505 endomembrane system; GO:0012506 vesicle membrane; GO:0016020 membrane; GO:0019898 e…	GO:0003824 catalytic activity; GO:0005488 binding; GO:0005515 protein binding; GO:0008092 cytoskeletal protein binding; GO:0016462 pyrophosphatase activity; GO:0016787 hydrolase activity; GO:0016817 hydrolase activity, acting on acid anhydrides; GO:0016818 hydrolase activity, acting on acid anhydrides, in phosphorus-containing anhydrides; GO:0016887 ATPase activity; GO:0017111 nucleoside-triphosp…
Q9UIB8	SLAM family member 5 OS=Homo sapiens OX=9606 GN=CD84 PE=1 SV=1	CD84	5	2	3	2	2	38.8	1.50573e+06					156064						112932	244406	523738	132327	2.875					0.449						0.162	0.335	1.043	0.379	0.289	0.249544	extracellular	K06511			GO:0001817 regulation of cytokine production; GO:0001818 negative regulation of cytokine production; GO:0001819 positive regulation of cytokine production; GO:0001932 regulation of protein phosphorylation; GO:0001934 positive regulation of protein phosphorylation; GO:0002376 immune system process; GO:0002682 regulation of immune system process; GO:0002683 negative regulation of immune system proc…	GO:0005623 cell; GO:0005886 plasma membrane; GO:0005887 integral component of plasma membrane; GO:0016020 membrane; GO:0016021 integral component of membrane; GO:0031224 intrinsic component of membrane; GO:0031226 intrinsic component of plasma membrane; GO:0071944 cell periphery;	GO:0005488 binding; GO:0005515 protein binding; GO:0042802 identical protein binding;
O60499	Syntaxin-10 OS=Homo sapiens OX=9606 GN=STX10 PE=1 SV=1	STX10	24	5	8	5	5	28.1	1961342	1.25825e+06	365128	2.46413e+06	376285	267896	1.16552e+06	1.5364e+06	393288	887013	633886		1.72084e+06	906136	681083	1.599	3.174	1.293	3.652	0.363	0.329	1.403	1.646	0.688	0.788	0.742		1.008	0.771	0.834	0.568	0.606556	cytoplasm	K23937	STX10; syntaxin 10	hsa05132 Salmonella infection	GO:0006810 transport; GO:0006886 intracellular protein transport; GO:0006906 vesicle fusion; GO:0006996 organelle organization; GO:0008104 protein localization; GO:0009987 cellular process; GO:0015031 protein transport; GO:0015833 peptide transport; GO:0016043 cellular component organization; GO:0016050 vesicle organization; GO:0016192 vesicle-mediated transport; GO:0016197 endosomal transport; G…	GO:0000139 Golgi membrane; GO:0005622 intracellular; GO:0005623 cell; GO:0005737 cytoplasm; GO:0005794 Golgi apparatus; GO:0005802 trans-Golgi network; GO:0012505 endomembrane system; GO:0016020 membrane; GO:0016021 integral component of membrane; GO:0031090 organelle membrane; GO:0031201 SNARE complex; GO:0031224 intrinsic component of membrane; GO:0031982 vesicle; GO:0031984 organelle subcompar…	GO:0000149 SNARE binding; GO:0005484 SNAP receptor activity; GO:0005488 binding; GO:0005515 protein binding; GO:0019905 syntaxin binding;	PF09177	Syntaxin 6, N-terminal
Q15363	Transmembrane emp24 domain-containing protein 2 OS=Homo sapiens OX=9606 GN=TMED2 PE=1 SV=1	TMED2	9	2	17	2	2	22.7	2.15441e+06			1.07528e+06	2.03397e+06	1.51428e+06	966139	900207	503801	1.25001e+06	970520	3144823	3.37331e+06	3.75758e+06	2.3568e+06	0.993			0.901	1.108	1.053	0.658	0.545	0.498	0.628	0.642	1.09	1.117	1.807	1.632	0.944	0.529321	extracellular	K20347			GO:0000003 reproduction; GO:0000578 embryonic axis specification; GO:0001568 blood vessel development; GO:0001701 in utero embryonic development; GO:0001756 somitogenesis; GO:0001838 embryonic epithelial tube formation; GO:0001841 neural tube formation; GO:0001843 neural tube closure; GO:0001890 placenta development; GO:0001892 embryonic placenta development; GO:0001893 maternal placenta developm…	GO:0005622 intracellular; GO:0005623 cell; GO:0005737 cytoplasm; GO:0005783 endoplasmic reticulum; GO:0005793 endoplasmic reticulum-Golgi intermediate compartment; GO:0005794 Golgi apparatus; GO:0005798 Golgi-associated vesicle; GO:0012505 endomembrane system; GO:0012506 vesicle membrane; GO:0016020 membrane; GO:0016021 integral component of membrane; GO:0030135 coated vesicle; GO:0030137 COPI-co…		PF01105	emp24/gp25L/p24 family/GOLD
Q7Z7H5	Transmembrane emp24 domain-containing protein 4 OS=Homo sapiens OX=9606 GN=TMED4 PE=1 SV=1	TMED4	9	3	14	3	3	25.9	6.04204e+06				2.2218e+06	593995	4436317	1.12174e+06		1.62241e+06	444376	2.58311e+06	1.48536e+06	2.40442e+06	1.21354e+06	2.341				1.017	0.347	2.538	0.571		0.685	0.247	0.752	0.413	0.972	0.706	0.697	0.560447	extracellular	K20346						PF01105	emp24/gp25L/p24 family/GOLD
O00186	Syntaxin-binding protein 3 OS=Homo sapiens OX=9606 GN=STXBP3 PE=1 SV=2	STXBP3	11	7	43	7	7	67.7	6.03921e+06	921407	786509	3.01889e+06	4.74649e+06	3.40061e+06	4.06221e+06	5.31412e+06	3.09323e+06	8.05788e+06	3.53713e+06	8.2436e+06	6.91147e+06	6.25079e+06	3.5985e+06	1.134	0.535	0.641	1.031	1.054	0.963	1.127	1.312	1.246	1.649	0.954	1.164	0.932	1.224	1.015	1.322	0.0310671	cytoplasm	K15301			GO:0001775 cell activation; GO:0002252 immune effector process; GO:0002263 cell activation involved in immune response; GO:0002274 myeloid leukocyte activation; GO:0002275 myeloid cell activation involved in immune response; GO:0002283 neutrophil activation involved in immune response; GO:0002366 leukocyte activation involved in immune response; GO:0002376 immune system process; GO:0002443 leukoc…	GO:0005622 intracellular; GO:0005623 cell; GO:0005737 cytoplasm; GO:0005829 cytosol; GO:0005886 plasma membrane; GO:0012505 endomembrane system; GO:0016020 membrane; GO:0030141 secretory granule; GO:0031091 platelet alpha granule; GO:0031410 cytoplasmic vesicle; GO:0031982 vesicle; GO:0042581 specific granule; GO:0043226 organelle; GO:0043227 membrane-bounded organelle; GO:0043229 intracellular o…	GO:0000149 SNARE binding; GO:0005488 binding; GO:0005515 protein binding; GO:0019905 syntaxin binding;
P61764	Syntaxin-binding protein 1 OS=Homo sapiens OX=9606 GN=STXBP1 PE=1 SV=1	STXBP1	7	3	7	3	3	67.5	1.34025e+06	525299	182544	699679	1.19458e+06	1.10048e+06	861454	1.1664e+06	478099	602195	892266		2.18633e+06	879090	489493	1.268	1.537	0.75	1.203	1.336	1.57	1.203	1.45	0.97	0.621	1.212		1.485	0.867	0.695	0.832	0.243216	cytoplasm	K15292	STXBP1; syntaxin-binding protein 1	hsa04721 Synaptic vesicle cycle
Q9P289	Serine/threonine-protein kinase 26 OS=Homo sapiens OX=9606 GN=STK26 PE=1 SV=2	STK26	14	6	43	2	2	46.5	1.67143e+06		231353	587944	640718		262633	342575		863222	313966	1.08587e+06	616010	737540	494984	2.176		1.307	1.391	0.986		0.505	0.586		1.224	0.587	1.062	0.576	1.001	0.968	0.555	0.0170055	cytoplasm,nucleus	K08838			GO:0000165 MAPK cascade; GO:0000185 activation of MAPKKK activity; GO:0000302 response to reactive oxygen species; GO:0000902 cell morphogenesis; GO:0001932 regulation of protein phosphorylation; GO:0001934 positive regulation of protein phosphorylation; GO:0006464 cellular protein modification process; GO:0006468 protein phosphorylation; GO:0006793 phosphorus metabolic process; GO:0006796 phosph…	GO:0000139 Golgi membrane; GO:0005622 intracellular; GO:0005623 cell; GO:0005737 cytoplasm; GO:0005794 Golgi apparatus; GO:0005798 Golgi-associated vesicle; GO:0005829 cytosol; GO:0005886 plasma membrane; GO:0012505 endomembrane system; GO:0012506 vesicle membrane; GO:0016020 membrane; GO:0016324 apical plasma membrane; GO:0031090 organelle membrane; GO:0031410 cytoplasmic vesicle; GO:0031982 ves…	GO:0000166 nucleotide binding; GO:0000287 magnesium ion binding; GO:0003824 catalytic activity; GO:0004672 protein kinase activity; GO:0004674 protein serine/threonine kinase activity; GO:0005488 binding; GO:0005515 protein binding; GO:0005524 ATP binding; GO:0008144 drug binding; GO:0008349 MAP kinase kinase kinase kinase activity; GO:0016301 kinase activity; GO:0016740 transferase activity; GO:…	PF00069	Protein kinase domain
P42229	Signal transducer and activator of transcription 5A OS=Homo sapiens OX=9606 GN=STAT5A PE=1 SV=1	STAT5A	9	7	28	7	7	90.6	7.79388e+06	1.39151e+06		3.51632e+06	7.06399e+06	3.32213e+06	1453301	2.94304e+06	853763	4.14553e+06	1.45408e+06	5.16313e+06	4.80427e+06	5.84715e+06	3.96864e+06	1.729	0.955		1.418	1.852	1.111	0.476	0.858	0.406	1.002	0.463	0.861	0.765	1.353	1.322	0.59	0.0231017	cytoplasm	K11223	STAT5A; signal transducer and activator of transcription 5A	hsa05161 Hepatitis B; hsa05203 Viral carcinogenesis; hsa05221 Acute myeloid leukemia; hsa05166 Human T-cell leukemia virus 1 infection; hsa05200 Pathways in cancer; hsa04935 Growth hormone synthesis, secretion and action; hsa05207 Chemical carcinogenesis - receptor activation; hsa04917 Prolactin signaling pathway; hsa04012 ErbB signaling pathway; hsa04630 JAK-STAT signaling pathway; hsa05162 Meas…	GO:0000255 allantoin metabolic process; GO:0001936 regulation of endothelial cell proliferation; GO:0001938 positive regulation of endothelial cell proliferation; GO:0006082 organic acid metabolic process; GO:0006101 citrate metabolic process; GO:0006103 2-oxoglutarate metabolic process; GO:0006105 succinate metabolic process; GO:0006107 oxaloacetate metabolic process; GO:0006355 regulation of tr…	GO:0005622 intracellular; GO:0005623 cell; GO:0005634 nucleus; GO:0005654 nucleoplasm; GO:0005737 cytoplasm; GO:0005829 cytosol; GO:0031974 membrane-enclosed lumen; GO:0031981 nuclear lumen; GO:0043226 organelle; GO:0043227 membrane-bounded organelle; GO:0043229 intracellular organelle; GO:0043231 intracellular membrane-bounded organelle; GO:0043233 organelle lumen; GO:0070013 intracellular organ…	GO:0000981 DNA-binding transcription factor activity, RNA polymerase II-specific; GO:0003700 DNA-binding transcription factor activity; GO:0003824 catalytic activity; GO:0004672 protein kinase activity; GO:0004713 protein tyrosine kinase activity; GO:0016301 kinase activity; GO:0016740 transferase activity; GO:0016772 transferase activity, transferring phosphorus-containing groups; GO:0016773 pho…	PF02865; PF02864; PF00017	STAT protein, protein interaction domain; STAT protein, DNA binding domain; SH2 domain
O95630	STAM-binding protein OS=Homo sapiens OX=9606 GN=STAMBP PE=1 SV=1	STAMBP	5	3	23	3	3	48	1.74998e+06	328782	164659	701979	1390000	1.35267e+06	1.51467e+06	1.49681e+06	415502	1.53389e+06	1.47066e+06	1.76432e+06	1.77394e+06	2.38712e+06	1.23723e+06	1.159	0.674	0.473	0.845	1.088	1.351	1.481	1.303	0.59	1.106	1.398	0.878	0.844	1.649	1.231	1.25	0.22337	cytoplasm,nucleus	K11866	STAMBP; STAM-binding protein [EC:3.4.19.12]	hsa04144 Endocytosis	GO:0000278 mitotic cell cycle; GO:0000281 mitotic cytokinesis; GO:0000910 cytokinesis; GO:0006464 cellular protein modification process; GO:0006508 proteolysis; GO:0006807 nitrogen compound metabolic process; GO:0007049 cell cycle; GO:0007154 cell communication; GO:0007165 signal transduction; GO:0007259 receptor signaling pathway via JAK-STAT; GO:0008152 metabolic process; GO:0008284 positive re…	GO:0005622 intracellular; GO:0005623 cell; GO:0005634 nucleus; GO:0005654 nucleoplasm; GO:0005737 cytoplasm; GO:0005768 endosome; GO:0005769 early endosome; GO:0005829 cytosol; GO:0005886 plasma membrane; GO:0012505 endomembrane system; GO:0016020 membrane; GO:0031410 cytoplasmic vesicle; GO:0031974 membrane-enclosed lumen; GO:0031981 nuclear lumen; GO:0031982 vesicle; GO:0032153 cell division si…	GO:0003824 catalytic activity; GO:0004843 thiol-dependent ubiquitin-specific protease activity; GO:0005488 binding; GO:0005515 protein binding; GO:0008233 peptidase activity; GO:0008234 cysteine-type peptidase activity; GO:0016787 hydrolase activity; GO:0019783 ubiquitin-like protein-specific protease activity; GO:0019904 protein domain specific binding; GO:0036459 thiol-dependent ubiquitinyl hyd…	PF08969	Domain of unknown function (DUF1873)
P53597	Succinate--CoA ligase [ADP/GDP-forming] subunit alpha, mitochondrial OS=Homo sapiens OX=9606 GN=SUCLG1 PE=1 SV=4	SUCLG1	16	4	30	4	4	36.2	2.06468e+06			1.85889e+06	4.93851e+06	873449	1.63359e+06	1.26834e+06	602256	3.07489e+06	1.69561e+06	7.25033e+06	6.31303e+06	2.57168e+06	2.08748e+06	0.631			1.032	1.783	0.402	0.737	0.509	0.394	1.023	0.744	1.664	1.385	0.819	0.958	0.951	0.965553	mitochondria	K01899	LSC1; succinyl-CoA synthetase alpha subunit [EC:6.2.1.4 6.2.1.5]	hsa00640 Propanoate metabolism; hsa01200 Carbon metabolism; hsa00020 Citrate cycle (TCA cycle); hsa01100 Metabolic pathways	GO:0006082 organic acid metabolic process; GO:0006091 generation of precursor metabolites and energy; GO:0006099 tricarboxylic acid cycle; GO:0006101 citrate metabolic process; GO:0006104 succinyl-CoA metabolic process; GO:0006105 succinate metabolic process; GO:0006139 nucleobase-containing compound metabolic process; GO:0006163 purine nucleotide metabolic process; GO:0006637 acyl-CoA metabolic …	GO:0005622 intracellular; GO:0005623 cell; GO:0005737 cytoplasm; GO:0005739 mitochondrion; GO:0005759 mitochondrial matrix; GO:0005829 cytosol; GO:0005886 plasma membrane; GO:0016020 membrane; GO:0030062 mitochondrial tricarboxylic acid cycle enzyme complex; GO:0031974 membrane-enclosed lumen; GO:0032991 protein-containing complex; GO:0042709 succinate-CoA ligase complex; GO:0043226 organelle; GO…	GO:0000166 nucleotide binding; GO:0001882 nucleoside binding; GO:0001883 purine nucleoside binding; GO:0003824 catalytic activity; GO:0004774 succinate-CoA ligase activity; GO:0004775 succinate-CoA ligase (ADP-forming) activity; GO:0004776 succinate-CoA ligase (GDP-forming) activity; GO:0005488 binding; GO:0005515 protein binding; GO:0016874 ligase activity; GO:0016877 ligase activity, forming ca…	PF02629; PF00549	CoA binding domain; CoA-ligase
Q9NP77	RNA polymerase II subunit A C-terminal domain phosphatase SSU72 OS=Homo sapiens OX=9606 GN=SSU72 PE=1 SV=1	SSU72	13	2	4	2	2	22.6	1.61418e+06			4.15878e+06	3.30379e+06	8.69686e+06	840548	1.0283e+06		1.09995e+06	1.78956e+06	1.05896e+06	1.8381e+06	2.73773e+06	3.79876e+06	0.516			2.416	1.248	4.191	0.397	0.432		0.383	0.821	0.254	0.422	0.912	1.823	0.325	0.0396449	mitochondria	K15544	SSU72; RNA polymerase II subunit A C-terminal domain phosphatase SSU72 [EC:3.1.3.16]	hsa03015 mRNA surveillance pathway	GO:0006139 nucleobase-containing compound metabolic process; GO:0006351 transcription, DNA-templated; GO:0006353 DNA-templated transcription, termination; GO:0006355 regulation of transcription, DNA-templated; GO:0006357 regulation of transcription by RNA polymerase II; GO:0006366 transcription by RNA polymerase II; GO:0006369 termination of RNA polymerase II transcription; GO:0006378 mRNA polyad…	GO:0005622 intracellular; GO:0005623 cell; GO:0005634 nucleus; GO:0005654 nucleoplasm; GO:0005737 cytoplasm; GO:0005829 cytosol; GO:0005847 mRNA cleavage and polyadenylation specificity factor complex; GO:0005849 mRNA cleavage factor complex; GO:0031974 membrane-enclosed lumen; GO:0031981 nuclear lumen; GO:0032991 protein-containing complex; GO:0043226 organelle; GO:0043227 membrane-bounded organ…	GO:0003824 catalytic activity; GO:0004721 phosphoprotein phosphatase activity; GO:0004722 protein serine/threonine phosphatase activity; GO:0008420 RNA polymerase II CTD heptapeptide repeat phosphatase activity; GO:0016787 hydrolase activity; GO:0016788 hydrolase activity, acting on ester bonds; GO:0016791 phosphatase activity; GO:0042578 phosphoric ester hydrolase activity; GO:0140096 catalytic …
Q13033	Striatin-3 OS=Homo sapiens OX=9606 GN=STRN3 PE=1 SV=3	STRN3	13	9	23	6	8	87.2	2.66922e+06	1.02149e+06		2.67639e+06	749663	951102	1.22636e+06	2.36481e+06	713226	1.66469e+06	1.76989e+06	5.24526e+06	5.07572e+06	2.72687e+06	1.76751e+06	1.039	1.23		1.893	0.345	0.558	0.705	1.209	0.595	0.706	0.989	1.534	1.419	1.107	1.033	1.02	0.607526	nucleus	K17608			GO:0000122 negative regulation of transcription by RNA polymerase II; GO:0006355 regulation of transcription, DNA-templated; GO:0006357 regulation of transcription by RNA polymerase II; GO:0009719 response to endogenous stimulus; GO:0009725 response to hormone; GO:0009889 regulation of biosynthetic process; GO:0009890 negative regulation of biosynthetic process; GO:0009891 positive regulation of …	GO:0005622 intracellular; GO:0005623 cell; GO:0005634 nucleus; GO:0005654 nucleoplasm; GO:0005737 cytoplasm; GO:0005794 Golgi apparatus; GO:0005886 plasma membrane; GO:0012505 endomembrane system; GO:0016020 membrane; GO:0030425 dendrite; GO:0031974 membrane-enclosed lumen; GO:0031981 nuclear lumen; GO:0032991 protein-containing complex; GO:0036477 somatodendritic compartment; GO:0042995 cell pro…	GO:0003700 DNA-binding transcription factor activity; GO:0005488 binding; GO:0005515 protein binding; GO:0005516 calmodulin binding; GO:0017016 Ras GTPase binding; GO:0017048 Rho GTPase binding; GO:0019899 enzyme binding; GO:0019902 phosphatase binding; GO:0019903 protein phosphatase binding; GO:0019904 protein domain specific binding; GO:0031267 small GTPase binding; GO:0044877 protein-containin…
O75886	Signal transducing adapter molecule 2 OS=Homo sapiens OX=9606 GN=STAM2 PE=1 SV=1	STAM2	4	2	12	1	2	58.1	3.23852e+06	1.92777e+06	5100652	4.00051e+06	2.60256e+06	5.17415e+06	2.52442e+06	4.86243e+06	6.24732e+06	4.96469e+06	5.29424e+06	2.37292e+06	1.91057e+06	2047099	3.01881e+06																		nucleus	K04705	STAM; signal transducing adaptor molecule	hsa04630 JAK-STAT signaling pathway; hsa04144 Endocytosis	GO:0006810 transport; GO:0006914 autophagy; GO:0006996 organelle organization; GO:0007032 endosome organization; GO:0008152 metabolic process; GO:0009056 catabolic process; GO:0009966 regulation of signal transduction; GO:0009968 negative regulation of signal transduction; GO:0009987 cellular process; GO:0010256 endomembrane system organization; GO:0010646 regulation of cell communication; GO:001…	GO:0005622 intracellular; GO:0005623 cell; GO:0005634 nucleus; GO:0005654 nucleoplasm; GO:0005737 cytoplasm; GO:0005768 endosome; GO:0005829 cytosol; GO:0012505 endomembrane system; GO:0031410 cytoplasmic vesicle; GO:0031974 membrane-enclosed lumen; GO:0031981 nuclear lumen; GO:0031982 vesicle; GO:0032991 protein-containing complex; GO:0033565 ESCRT-0 complex; GO:0036452 ESCRT complex; GO:0043226…		PF00790; PF00018	VHS domain; SH3 domain
O00267	Transcription elongation factor SPT5 OS=Homo sapiens OX=9606 GN=SUPT5H PE=1 SV=1	SUPT5H	6	5	16	5	5	120.9	3.42713e+06	4.6895e+06	4.49261e+06	4.33562e+06	5.11378e+06	4.02104e+06	6.13134e+06	5.30559e+06	7.22599e+06	8.1754e+06	6.38315e+06	4.69129e+06	6.67088e+06	3.17856e+06	2.50536e+06	0.573	2.427	3.262	1.318	1.011	1.014	1.514	1.166	2.591	1.489	1.533	0.59	0.801	0.554	0.629	0.754	0.440343	nucleus	K15172			GO:0000122 negative regulation of transcription by RNA polymerase II; GO:0006139 nucleobase-containing compound metabolic process; GO:0006351 transcription, DNA-templated; GO:0006354 DNA-templated transcription, elongation; GO:0006355 regulation of transcription, DNA-templated; GO:0006357 regulation of transcription by RNA polymerase II; GO:0006366 transcription by RNA polymerase II; GO:0006368 t…	GO:0005622 intracellular; GO:0005623 cell; GO:0005634 nucleus; GO:0005654 nucleoplasm; GO:0008023 transcription elongation factor complex; GO:0031974 membrane-enclosed lumen; GO:0031981 nuclear lumen; GO:0032044 DSIF complex; GO:0032991 protein-containing complex; GO:0043226 organelle; GO:0043227 membrane-bounded organelle; GO:0043229 intracellular organelle; GO:0043231 intracellular membrane-bou…	GO:0003676 nucleic acid binding; GO:0003677 DNA binding; GO:0003682 chromatin binding; GO:0003723 RNA binding; GO:0003729 mRNA binding; GO:0005488 binding; GO:0005515 protein binding; GO:0019899 enzyme binding; GO:0046982 protein heterodimerization activity; GO:0046983 protein dimerization activity; GO:0097159 organic cyclic compound binding; GO:1901363 heterocyclic compound binding;	PF11942	Spt5 transcription elongation factor, acidic N-terminal
O15020	Spectrin beta chain, non-erythrocytic 2 OS=Homo sapiens OX=9606 GN=SPTBN2 PE=1 SV=3	SPTBN2	24	50	232	42	43	271.2	1.12679e+08	2.5823e+07	3.93348e+07	1.16299e+08	1.15913e+08	8.03848e+07	4.77681e+07	7.61059e+07	41506299	5.7686e+07	6.36175e+07	1.70734e+08	1.18865e+08	9.82556e+07	7.18996e+07	1.163	0.825	1.763	2.182	1.414	1.251	0.728	1.032	0.919	0.649	0.943	1.324	0.881	1.058	1.115	0.671	0.0212764	cytoplasm	K23932	SPTBN2; spectrin beta, non-erythrocytic 2	hsa05017 Spinocerebellar ataxia; hsa05022 Pathways of neurodegeneration - multiple diseases	GO:0000165 MAPK cascade; GO:0000902 cell morphogenesis; GO:0000904 cell morphogenesis involved in differentiation; GO:0001505 regulation of neurotransmitter levels; GO:0002376 immune system process; GO:0002478 antigen processing and presentation of exogenous peptide antigen; GO:0002495 antigen processing and presentation of peptide antigen via MHC class II; GO:0002504 antigen processing and prese…	GO:0000139 Golgi membrane; GO:0005622 intracellular; GO:0005623 cell; GO:0005634 nucleus; GO:0005737 cytoplasm; GO:0005768 endosome; GO:0005794 Golgi apparatus; GO:0005829 cytosol; GO:0005856 cytoskeleton; GO:0005886 plasma membrane; GO:0005938 cell cortex; GO:0008021 synaptic vesicle; GO:0008091 spectrin; GO:0012505 endomembrane system; GO:0015629 actin cytoskeleton; GO:0016020 membrane; GO:0016…	GO:0003779 actin binding; GO:0005085 guanyl-nucleotide exchange factor activity; GO:0005088 Ras guanyl-nucleotide exchange factor activity; GO:0005198 structural molecule activity; GO:0005200 structural constituent of cytoskeleton; GO:0005488 binding; GO:0005515 protein binding; GO:0008092 cytoskeletal protein binding; GO:0017016 Ras GTPase binding; GO:0019899 enzyme binding; GO:0031267 small GTP…	PF00307; PF00435	Calponin homology (CH) domain; Spectrin repeat
P78539	Sushi repeat-containing protein SRPX OS=Homo sapiens OX=9606 GN=SRPX PE=1 SV=1	SRPX	9	4	19	4	4	51.5	1.31422e+06	1.77738e+06	1.51387e+06	2.19688e+06	1.25749e+06	2.42465e+06	3.01507e+06	2.11156e+06	3.53258e+06	4.20054e+06	845427	1832670	1.83961e+06	847619	1.12923e+06	0.562	2.353	2.813	1.709	0.636	1.565	1.905	1.187	3.241	1.958	0.519	0.589	0.565	0.378	0.726	0.766	0.368145	extracellular	K23818			GO:0001845 phagolysosome assembly; GO:0006810 transport; GO:0006897 endocytosis; GO:0006909 phagocytosis; GO:0006914 autophagy; GO:0006950 response to stress; GO:0006996 organelle organization; GO:0007033 vacuole organization; GO:0007040 lysosome organization; GO:0008152 metabolic process; GO:0008285 negative regulation of cell population proliferation; GO:0009056 catabolic process; GO:0009966 re…	GO:0005622 intracellular; GO:0005623 cell; GO:0005737 cytoplasm; GO:0005773 vacuole; GO:0005776 autophagosome; GO:0005783 endoplasmic reticulum; GO:0012505 endomembrane system; GO:0016020 membrane; GO:0043226 organelle; GO:0043227 membrane-bounded organelle; GO:0043229 intracellular organelle; GO:0043231 intracellular membrane-bounded organelle;		PF00084; PF02494	Sushi domain (SCR repeat); HYR domain
P63313	Thymosin beta-10 OS=Homo sapiens OX=9606 GN=TMSB10 PE=1 SV=2	TMSB10	50	2	71	1	1	5	1.3656e+08	5.78429e+06	5.99428e+06	1.181e+07	1.65527e+07	1.54193e+07	2.24112e+07	5.41579e+07	1.6881e+07	4.32588e+07	4.61098e+07	2.78776e+07	9.21825e+07	5.04778e+07	1.69607e+07																		cytoplasm	K13785			GO:0006996 organelle organization; GO:0007010 cytoskeleton organization; GO:0009987 cellular process; GO:0016043 cellular component organization; GO:0030029 actin filament-based process; GO:0030036 actin cytoskeleton organization; GO:0071840 cellular component organization or biogenesis;	GO:0005622 intracellular; GO:0005623 cell; GO:0005737 cytoplasm;	GO:0003779 actin binding; GO:0003785 actin monomer binding; GO:0005488 binding; GO:0005515 protein binding; GO:0008092 cytoskeletal protein binding;
Q9BVA1	Tubulin beta-2B chain OS=Homo sapiens OX=9606 GN=TUBB2B PE=1 SV=1	TUBB2B	73	24	1285	2	9	49.9	4.42164e+07	1.48214e+07	7.56143e+06	1.6224e+07	1.87321e+07	1.70634e+07	4.25023e+07	6.22332e+07	2.77824e+07	4.65387e+07	3.6804e+07	6.67831e+07	63920169	4.47473e+07	3.03409e+07	1.045	1.084	0.776	0.697	0.523	0.608	1.483	1.933	1.408	1.198	1.249	1.186	1.085	1.103	1.077	1.651	0.00103631	cytoplasm	K07375	TUBB; tubulin beta	hsa05016 Huntington disease; hsa04540 Gap junction; hsa05012 Parkinson disease; hsa05010 Alzheimer disease; hsa05132 Salmonella infection; hsa04145 Phagosome; hsa05130 Pathogenic Escherichia coli infection; hsa05022 Pathways of neurodegeneration - multiple diseases; hsa05014 Amyotrophic lateral sclerosis; hsa05020 Prion disease	GO:0001764 neuron migration; GO:0006928 movement of cell or subcellular component; GO:0007017 microtubule-based process; GO:0007275 multicellular organism development; GO:0007399 nervous system development; GO:0009987 cellular process; GO:0010720 positive regulation of cell development; GO:0010769 regulation of cell morphogenesis involved in differentiation; GO:0010770 positive regulation of cell…	GO:0005622 intracellular; GO:0005623 cell; GO:0005856 cytoskeleton; GO:0005874 microtubule; GO:0015630 microtubule cytoskeleton; GO:0043226 organelle; GO:0043228 non-membrane-bounded organelle; GO:0043229 intracellular organelle; GO:0043232 intracellular non-membrane-bounded organelle; GO:0099080 supramolecular complex; GO:0099081 supramolecular polymer; GO:0099512 supramolecular fiber; GO:009951…	GO:0005488 binding; GO:0005515 protein binding; GO:0046982 protein heterodimerization activity; GO:0046983 protein dimerization activity;	PF00091; PF03953	Tubulin/FtsZ family, GTPase domain; Tubulin C-terminal domain
Q03169	Tumor necrosis factor alpha-induced protein 2 OS=Homo sapiens OX=9606 GN=TNFAIP2 PE=1 SV=2	TNFAIP2	18	12	69	12	12	72.6	4.48523e+07	4.18073e+06	1.22883e+07	1.67608e+07	3.23103e+07	1.659e+07	3.6165e+07	2.65765e+07	1.93425e+07	3.24197e+07	3.00072e+07	3.83793e+07	3.727e+07	2.84304e+07	2.06693e+07	1.446	0.417	1.719	0.982	1.231	0.806	1.721	1.125	1.336	1.138	1.388	0.929	0.863	0.956	1	1.056	0.520998	nucleus	K19989			GO:0006810 transport; GO:0006887 exocytosis; GO:0008104 protein localization; GO:0009987 cellular process; GO:0016192 vesicle-mediated transport; GO:0031503 protein-containing complex localization; GO:0032940 secretion by cell; GO:0033036 macromolecule localization; GO:0034613 cellular protein localization; GO:0034629 cellular protein-containing complex localization; GO:0046903 secretion; GO:0051…	GO:0000145 exocyst; GO:0005576 extracellular region; GO:0005615 extracellular space; GO:0005622 intracellular; GO:0005623 cell; GO:0005737 cytoplasm; GO:0005938 cell cortex; GO:0032991 protein-containing complex; GO:0071944 cell periphery; GO:0099023 vesicle tethering complex; GO:0099568 cytoplasmic region;	GO:0000149 SNARE binding; GO:0005488 binding; GO:0005515 protein binding;
Q66K14	TBC1 domain family member 9B OS=Homo sapiens OX=9606 GN=TBC1D9B PE=1 SV=3	TBC1D9B	4	4	15	4	4	140.4	1.85564e+06	40856.9	179622	1.03179e+06	2.09395e+06	2.34541e+06	651712	739556	514521	2.07454e+06	1.00031e+06	887194	2.0701e+06	1.32985e+06	1.16431e+06	1.318	0.09	0.554	1.332	1.758	2.512	0.683	0.69	0.783	1.605	1.02	0.473	1.056	0.985	1.242	0.752	0.91205	cytoplasm	K19951			GO:0006810 transport; GO:0006886 intracellular protein transport; GO:0008104 protein localization; GO:0015031 protein transport; GO:0015833 peptide transport; GO:0031338 regulation of vesicle fusion; GO:0032879 regulation of localization; GO:0033036 macromolecule localization; GO:0033043 regulation of organelle organization; GO:0034613 cellular protein localization; GO:0042886 amide transport; GO…	GO:0005622 intracellular; GO:0005623 cell; GO:0012505 endomembrane system;	GO:0005096 GTPase activator activity; GO:0005488 binding; GO:0005515 protein binding; GO:0008047 enzyme activator activity; GO:0017016 Ras GTPase binding; GO:0017137 Rab GTPase binding; GO:0019899 enzyme binding; GO:0030234 enzyme regulator activity; GO:0030695 GTPase regulator activity; GO:0031267 small GTPase binding; GO:0051020 GTPase binding; GO:0060589 nucleoside-triphosphatase regulator act…	PF02893	GRAM domain
Q8IUR0	Trafficking protein particle complex subunit 5 OS=Homo sapiens OX=9606 GN=TRAPPC5 PE=1 SV=1	TRAPPC5	13	3	14	3	3	20.8	3.25397e+06		134285	445768	403370	301153	952880	639229		1.54096e+06	799562	1.66982e+06	3.5088e+06	2032974	1.70722e+06	2.071		0.371	0.516	0.303	0.289	0.895	0.535		1.068	0.731	0.798	1.604	1.349	1.632	1.516	0.0668181	mitochondria	K20280			GO:0006810 transport; GO:0006888 endoplasmic reticulum to Golgi vesicle-mediated transport; GO:0006900 vesicle budding from membrane; GO:0006901 vesicle coating; GO:0006903 vesicle targeting; GO:0006996 organelle organization; GO:0009987 cellular process; GO:0016043 cellular component organization; GO:0016050 vesicle organization; GO:0016192 vesicle-mediated transport; GO:0022607 cellular compone…	GO:0005622 intracellular; GO:0005623 cell; GO:0005737 cytoplasm; GO:0005829 cytosol; GO:0030008 TRAPP complex; GO:0032991 protein-containing complex; GO:0099023 vesicle tethering complex;	GO:0005085 guanyl-nucleotide exchange factor activity; GO:0005088 Ras guanyl-nucleotide exchange factor activity; GO:0005488 binding; GO:0005515 protein binding; GO:0017016 Ras GTPase binding; GO:0017112 Rab guanyl-nucleotide exchange factor activity; GO:0017137 Rab GTPase binding; GO:0019899 enzyme binding; GO:0031267 small GTPase binding; GO:0051020 GTPase binding; GO:0098772 molecular function…
Q14258	E3 ubiquitin/ISG15 ligase TRIM25 OS=Homo sapiens OX=9606 GN=TRIM25 PE=1 SV=2	TRIM25	27	16	119	16	16	70.9	1.24173e+07	4.32991e+06	1.14533e+06	4.70908e+06	6.61907e+06	5.79588e+06	1.32113e+07	9.28121e+06	7.88245e+06	1.2795e+07	6.41706e+06	2.43647e+07	1.87771e+07	1.66084e+07	9.48556e+06	1.031	1.112	0.413	0.71	0.649	0.725	1.619	1.012	1.403	1.157	0.765	1.52	1.119	1.438	1.183	1.611	0.00543603	nucleus	K10652	TRIM25; tripartite motif-containing protein 25 [EC:2.3.2.27]	hsa04622 RIG-I-like receptor signaling pathway; hsa04064 NF-kappa B signaling pathway; hsa05164 Influenza A	GO:0000731 DNA synthesis involved in DNA repair; GO:0001817 regulation of cytokine production; GO:0001818 negative regulation of cytokine production; GO:0002376 immune system process; GO:0006139 nucleobase-containing compound metabolic process; GO:0006259 DNA metabolic process; GO:0006281 DNA repair; GO:0006301 postreplication repair; GO:0006355 regulation of transcription, DNA-templated; GO:0006…	GO:0005622 intracellular; GO:0005623 cell; GO:0005634 nucleus; GO:0005654 nucleoplasm; GO:0005737 cytoplasm; GO:0005829 cytosol; GO:0016604 nuclear body; GO:0031974 membrane-enclosed lumen; GO:0031981 nuclear lumen; GO:0043226 organelle; GO:0043227 membrane-bounded organelle; GO:0043229 intracellular organelle; GO:0043231 intracellular membrane-bounded organelle; GO:0043233 organelle lumen; GO:00…	GO:0003700 DNA-binding transcription factor activity; GO:0003824 catalytic activity; GO:0004842 ubiquitin-protein transferase activity; GO:0016740 transferase activity; GO:0019787 ubiquitin-like protein transferase activity; GO:0061630 ubiquitin protein ligase activity; GO:0061659 ubiquitin-like protein ligase activity; GO:0140096 catalytic activity, acting on a protein; GO:0140110 transcription …
P21283	V-type proton ATPase subunit C 1 OS=Homo sapiens OX=9606 GN=ATP6V1C1 PE=1 SV=4	ATP6V1C1	14	6	45	5	6	43.9	7.81641e+06	848119	80617.2	1.9558e+06	3.21727e+06	1.96074e+06	3.98619e+06	3.18242e+06	2.5451e+06	4.59996e+06	3.18224e+06	6.66559e+06	6.63649e+06	5.09753e+06	3.13804e+06	1.818	0.61	0.081	0.827	0.884	0.688	1.369	0.972	1.269	1.165	1.062	1.165	1.108	1.236	1.096	1.418	0.0785423	cytoplasm	K02148	ATPeV1C; V-type H+-transporting ATPase subunit C	hsa05120 Epithelial cell signaling in Helicobacter pylori infection; hsa04721 Synaptic vesicle cycle; hsa04150 mTOR signaling pathway; hsa00190 Oxidative phosphorylation; hsa04966 Collecting duct acid secretion; hsa05110 Vibrio cholerae infection; hsa05165 Human papillomavirus infection; hsa04145 Phagosome; hsa05323 Rheumatoid arthritis; hsa01100 Metabolic pathways	GO:0000041 transition metal ion transport; GO:0006810 transport; GO:0006811 ion transport; GO:0006812 cation transport; GO:0006826 iron ion transport; GO:0007154 cell communication; GO:0007165 signal transduction; GO:0007166 cell surface receptor signaling pathway; GO:0007167 enzyme linked receptor protein signaling pathway; GO:0007169 transmembrane receptor protein tyrosine kinase signaling path…	GO:0000221 vacuolar proton-transporting V-type ATPase, V1 domain; GO:0000323 lytic vacuole; GO:0005622 intracellular; GO:0005623 cell; GO:0005737 cytoplasm; GO:0005764 lysosome; GO:0005765 lysosomal membrane; GO:0005773 vacuole; GO:0005774 vacuolar membrane; GO:0005829 cytosol; GO:0005886 plasma membrane; GO:0016020 membrane; GO:0016469 proton-transporting two-sector ATPase complex; GO:0016471 va…	GO:0003824 catalytic activity; GO:0005215 transporter activity; GO:0008324 cation transmembrane transporter activity; GO:0008553 proton-exporting ATPase activity, phosphorylative mechanism; GO:0015075 ion transmembrane transporter activity; GO:0015077 monovalent inorganic cation transmembrane transporter activity; GO:0015078 proton transmembrane transporter activity; GO:0015318 inorganic molecula…
O00566	U3 small nucleolar ribonucleoprotein protein MPP10 OS=Homo sapiens OX=9606 GN=MPHOSPH10 PE=1 SV=2	MPHOSPH10	6	3	16	3	3	78.8		379347	514445		589871		745768	804978	366544	574972		2.21187e+06	2.13037e+06	623685	95653.5		1.216	2.314		0.722		1.141	1.096	0.814	0.649		1.722	1.585	0.674	0.149	0.691	0.38934	nucleus	K14559	MPP10; U3 small nucleolar RNA-associated protein MPP10	hsa03008 Ribosome biogenesis in eukaryotes	GO:0000375 RNA splicing, via transesterification reactions; GO:0006139 nucleobase-containing compound metabolic process; GO:0006364 rRNA processing; GO:0006396 RNA processing; GO:0006725 cellular aromatic compound metabolic process; GO:0006807 nitrogen compound metabolic process; GO:0008152 metabolic process; GO:0008380 RNA splicing; GO:0009892 negative regulation of metabolic process; GO:0009987…	GO:0005622 intracellular; GO:0005623 cell; GO:0005634 nucleus; GO:0005654 nucleoplasm; GO:0005730 nucleolus; GO:0005732 small nucleolar ribonucleoprotein complex; GO:0030684 preribosome; GO:0030686 90S preribosome; GO:0031974 membrane-enclosed lumen; GO:0031981 nuclear lumen; GO:0032040 small-subunit processome; GO:0032991 protein-containing complex; GO:0034457 Mpp10 complex; GO:0043226 organelle…
P42898	Methylenetetrahydrofolate reductase OS=Homo sapiens OX=9606 GN=MTHFR PE=1 SV=3	MTHFR	2	1	1	1	1	74.5																																	cytoplasm,nucleus	K25004	MTHFR; methylenetetrahydrofolate reductase (NADPH) [EC:1.5.1.53]	hsa00670 One carbon pool by folate; hsa01523 Antifolate resistance; hsa01100 Metabolic pathways	GO:0000096 sulfur amino acid metabolic process; GO:0000097 sulfur amino acid biosynthetic process; GO:0003008 system process; GO:0003013 circulatory system process; GO:0006082 organic acid metabolic process; GO:0006325 chromatin organization; GO:0006520 cellular amino acid metabolic process; GO:0006555 methionine metabolic process; GO:0006575 cellular modified amino acid metabolic process; GO:000…	GO:0005622 intracellular; GO:0005623 cell; GO:0005737 cytoplasm; GO:0005829 cytosol; GO:0045202 synapse;	GO:0000166 nucleotide binding; GO:0003824 catalytic activity; GO:0004489 methylenetetrahydrofolate reductase (NAD(P)H) activity; GO:0005488 binding; GO:0016491 oxidoreductase activity; GO:0016645 oxidoreductase activity, acting on the CH-NH group of donors; GO:0016646 oxidoreductase activity, acting on the CH-NH group of donors, NAD or NADP as acceptor; GO:0036094 small molecule binding; GO:00431…	PF02219	Methylenetetrahydrofolate reductase
Q15390	Mitochondrial fission regulator 1 OS=Homo sapiens OX=9606 GN=MTFR1 PE=1 SV=2	MTFR1	4	1	1	1	1	37	514211	346915				338926	502154	1.56904e+06	244905	351783		925537	939460	679752	615285																		mitochondria				GO:0000266 mitochondrial fission; GO:0006091 generation of precursor metabolites and energy; GO:0006996 organelle organization; GO:0007005 mitochondrion organization; GO:0008152 metabolic process; GO:0009060 aerobic respiration; GO:0009987 cellular process; GO:0015980 energy derivation by oxidation of organic compounds; GO:0016043 cellular component organization; GO:0044237 cellular metabolic pro…	GO:0005622 intracellular; GO:0005623 cell; GO:0005737 cytoplasm; GO:0005739 mitochondrion; GO:0005829 cytosol; GO:0005886 plasma membrane; GO:0016020 membrane; GO:0043226 organelle; GO:0043227 membrane-bounded organelle; GO:0043229 intracellular organelle; GO:0043231 intracellular membrane-bounded organelle; GO:0071944 cell periphery;
Q92614	Unconventional myosin-XVIIIa OS=Homo sapiens OX=9606 GN=MYO18A PE=1 SV=3	MYO18A	10	19	75	19	19	233	1.80074e+07	3.39377e+06	5.10289e+06	6.61976e+06	8.16318e+06	1.3275e+07	8.04464e+06	8.13744e+06	4.54553e+06	1.08793e+07	9.53394e+06	1.57433e+07	1.45754e+07	7827503	6.70369e+06	1.636	0.954	2.013	1.093	0.877	1.819	1.079	0.971	0.885	1.077	1.244	1.075	0.951	0.742	0.915	0.71	0.0974976	nucleus	K10362			GO:0002376 immune system process; GO:0002682 regulation of immune system process; GO:0002684 positive regulation of immune system process; GO:0002694 regulation of leukocyte activation; GO:0002697 regulation of immune effector process; GO:0002699 positive regulation of immune effector process; GO:0002791 regulation of peptide secretion; GO:0002793 positive regulation of peptide secretion; GO:0006…	GO:0005622 intracellular; GO:0005623 cell; GO:0005737 cytoplasm; GO:0005793 endoplasmic reticulum-Golgi intermediate compartment; GO:0005794 Golgi apparatus; GO:0005802 trans-Golgi network; GO:0005856 cytoskeleton; GO:0005903 brush border; GO:0012505 endomembrane system; GO:0015629 actin cytoskeleton; GO:0030139 endocytic vesicle; GO:0031410 cytoplasmic vesicle; GO:0031982 vesicle; GO:0031984 org…	GO:0000166 nucleotide binding; GO:0003779 actin binding; GO:0005488 binding; GO:0005515 protein binding; GO:0005524 ATP binding; GO:0008092 cytoskeletal protein binding; GO:0008144 drug binding; GO:0017076 purine nucleotide binding; GO:0030554 adenyl nucleotide binding; GO:0032553 ribonucleotide binding; GO:0032555 purine ribonucleotide binding; GO:0032559 adenyl ribonucleotide binding; GO:003563…	PF00063	Myosin head (motor domain)
Q9UBU9	Nuclear RNA export factor 1 OS=Homo sapiens OX=9606 GN=NXF1 PE=1 SV=1	NXF1	4	3	13	3	3	70.1	763237	367831		116976	767299	781225	1.21403e+06	1.20951e+06	1.14874e+06	1620641	1.02438e+06	2.73997e+06	2.69534e+06	1.84834e+06	1.0597e+06	0.524	0.781		0.146	0.623	0.809	1.231	1.091	1.691	1.212	1.01	1.414	1.329	1.324	1.093	2.196	0.00218462	nucleus	K14284	NXF; nuclear RNA export factor	hsa05168 Herpes simplex virus 1 infection; hsa03008 Ribosome biogenesis in eukaryotes; hsa03013 Nucleocytoplasmic transport; hsa05164 Influenza A; hsa05014 Amyotrophic lateral sclerosis; hsa03015 mRNA surveillance pathway	GO:0006403 RNA localization; GO:0006405 RNA export from nucleus; GO:0006406 mRNA export from nucleus; GO:0006611 protein export from nucleus; GO:0006810 transport; GO:0006886 intracellular protein transport; GO:0006913 nucleocytoplasmic transport; GO:0007275 multicellular organism development; GO:0007399 nervous system development; GO:0008104 protein localization; GO:0008152 metabolic process; GO…	GO:0005622 intracellular; GO:0005623 cell; GO:0005634 nucleus; GO:0005635 nuclear envelope; GO:0005643 nuclear pore; GO:0005654 nucleoplasm; GO:0005737 cytoplasm; GO:0005829 cytosol; GO:0012505 endomembrane system; GO:0016234 inclusion body; GO:0016604 nuclear body; GO:0016607 nuclear speck; GO:0031967 organelle envelope; GO:0031974 membrane-enclosed lumen; GO:0031975 envelope; GO:0031981 nuclear…	GO:0003676 nucleic acid binding; GO:0003723 RNA binding; GO:0003729 mRNA binding; GO:0005488 binding; GO:0097159 organic cyclic compound binding; GO:1901363 heterocyclic compound binding;	PF09162; PF02136; PF03943	Tap, RNA-binding; Nuclear transport factor 2 (NTF2) domain; TAP C-terminal domain
P22059	Oxysterol-binding protein 1 OS=Homo sapiens OX=9606 GN=OSBP PE=1 SV=1	OSBP	14	8	48	8	8	89.4	5.51263e+06	1.18367e+06		4.07914e+06	7.36402e+06	7.53988e+06	3.75221e+06	5.15201e+06	3.69971e+06	4.77382e+06	4.29232e+06	7.10829e+06	8.36444e+06	9.60186e+06	7.11799e+06	0.826	0.549		1.111	1.304	1.703	0.83	1.014	1.189	0.779	0.923	0.8	0.9	1.5	1.602	0.965	0.992091	cytoplasm	K20456			GO:0006082 organic acid metabolic process; GO:0006629 lipid metabolic process; GO:0006694 steroid biosynthetic process; GO:0006699 bile acid biosynthetic process; GO:0006810 transport; GO:0006869 lipid transport; GO:0008152 metabolic process; GO:0008202 steroid metabolic process; GO:0008206 bile acid metabolic process; GO:0008610 lipid biosynthetic process; GO:0009058 biosynthetic process; GO:000…	GO:0000139 Golgi membrane; GO:0005622 intracellular; GO:0005623 cell; GO:0005634 nucleus; GO:0005654 nucleoplasm; GO:0005730 nucleolus; GO:0005737 cytoplasm; GO:0005794 Golgi apparatus; GO:0005829 cytosol; GO:0012505 endomembrane system; GO:0016020 membrane; GO:0030054 cell junction; GO:0031090 organelle membrane; GO:0031974 membrane-enclosed lumen; GO:0031981 nuclear lumen; GO:0031984 organelle …	GO:0005215 transporter activity; GO:0005319 lipid transporter activity; GO:0005488 binding; GO:0005496 steroid binding; GO:0005515 protein binding; GO:0005543 phospholipid binding; GO:0008142 oxysterol binding; GO:0008289 lipid binding; GO:0015248 sterol transporter activity; GO:0015485 cholesterol binding; GO:0019904 protein domain specific binding; GO:0032934 sterol binding; GO:0035091 phosphat…	PF00169	PH domain
Q99460	26S proteasome non-ATPase regulatory subunit 1 OS=Homo sapiens OX=9606 GN=PSMD1 PE=1 SV=2	PSMD1	29	21	166	21	21	105.8	2.32202e+07	6.91959e+06	7.14161e+06	1.01691e+07	1.74581e+07	9.38064e+06	1.68696e+07	1.65353e+07	8.02299e+06	1.77756e+07	1.34831e+07	4.03846e+07	3.15888e+07	2.23572e+07	1.39078e+07	1.162	1.071	1.551	0.925	1.032	0.708	1.246	1.087	0.861	0.969	0.969	1.518	1.135	1.167	1.045	1.033	0.66433	cytoplasm	K03032	PSMD1; 26S proteasome regulatory subunit N2	hsa05017 Spinocerebellar ataxia; hsa05016 Huntington disease; hsa03050 Proteasome; hsa05169 Epstein-Barr virus infection; hsa05012 Parkinson disease; hsa05010 Alzheimer disease; hsa05022 Pathways of neurodegeneration - multiple diseases; hsa05014 Amyotrophic lateral sclerosis; hsa05020 Prion disease	GO:0001775 cell activation; GO:0002252 immune effector process; GO:0002263 cell activation involved in immune response; GO:0002274 myeloid leukocyte activation; GO:0002275 myeloid cell activation involved in immune response; GO:0002283 neutrophil activation involved in immune response; GO:0002366 leukocyte activation involved in immune response; GO:0002376 immune system process; GO:0002443 leukoc…	GO:0000323 lytic vacuole; GO:0000502 proteasome complex; GO:0005576 extracellular region; GO:0005622 intracellular; GO:0005623 cell; GO:0005634 nucleus; GO:0005654 nucleoplasm; GO:0005737 cytoplasm; GO:0005764 lysosome; GO:0005766 primary lysosome; GO:0005773 vacuole; GO:0005775 vacuolar lumen; GO:0005829 cytosol; GO:0005838 proteasome regulatory particle; GO:0008540 proteasome regulatory particl…	GO:0005488 binding; GO:0005515 protein binding; GO:0019899 enzyme binding; GO:0031625 ubiquitin protein ligase binding; GO:0044389 ubiquitin-like protein ligase binding;
Q92626	Peroxidasin homolog OS=Homo sapiens OX=9606 GN=PXDN PE=1 SV=2	PXDN	17	20	56	20	20	165.2	6.06898e+07	1.02312e+07	9.2629e+06	2.22021e+07	2.33218e+07	2.43249e+07	2.65262e+07	3.77293e+07	1.07266e+07	2.19611e+07	3.31478e+07	4.37088e+07	4.78856e+07	4.35904e+07	2.8227e+07	1.747	0.911	1.158	1.162	0.794	1.056	1.128	1.427	0.662	0.689	1.37	0.946	0.99	1.309	1.221	0.951	0.728456	extracellular	K19511			GO:0001959 regulation of cytokine-mediated signaling pathway; GO:0001960 negative regulation of cytokine-mediated signaling pathway; GO:0002376 immune system process; GO:0006955 immune response; GO:0008152 metabolic process; GO:0009056 catabolic process; GO:0009636 response to toxic substance; GO:0009966 regulation of signal transduction; GO:0009968 negative regulation of signal transduction; GO:…	GO:0005576 extracellular region; GO:0005615 extracellular space; GO:0005622 intracellular; GO:0005623 cell; GO:0005737 cytoplasm; GO:0005783 endoplasmic reticulum; GO:0012505 endomembrane system; GO:0031012 extracellular matrix; GO:0043226 organelle; GO:0043227 membrane-bounded organelle; GO:0043229 intracellular organelle; GO:0043231 intracellular membrane-bounded organelle;	GO:0003824 catalytic activity; GO:0004601 peroxidase activity; GO:0005102 signaling receptor binding; GO:0005126 cytokine receptor binding; GO:0005152 interleukin-1 receptor antagonist activity; GO:0005198 structural molecule activity; GO:0005201 extracellular matrix structural constituent; GO:0005488 binding; GO:0005515 protein binding; GO:0016209 antioxidant activity; GO:0016491 oxidoreductase …	PF07679; PF03098	Immunoglobulin I-set domain; Animal haem peroxidase
Q9P2N5	RNA-binding protein 27 OS=Homo sapiens OX=9606 GN=RBM27 PE=1 SV=2	RBM27	3	3	13	3	3	118.6	5.56485e+06	670474	243171	926328	3.03952e+06	2.2237e+06	1.03678e+06	1.89663e+06	805175	4.94504e+06	2.49655e+06	3.46267e+06	3.55151e+06	3.22804e+06	2.27902e+06	1.954	0.728	0.371	0.591	1.261	1.177	0.537	0.875	0.606	1.891	1.258	0.914	0.895	1.182	1.202	1.026	0.69325	nucleus	K13193				GO:0005622 intracellular; GO:0005623 cell; GO:0005634 nucleus; GO:0005654 nucleoplasm; GO:0005737 cytoplasm; GO:0016604 nuclear body; GO:0016607 nuclear speck; GO:0031974 membrane-enclosed lumen; GO:0031981 nuclear lumen; GO:0043226 organelle; GO:0043227 membrane-bounded organelle; GO:0043229 intracellular organelle; GO:0043231 intracellular membrane-bounded organelle; GO:0043233 organelle lumen;…
Q15276	Rab GTPase-binding effector protein 1 OS=Homo sapiens OX=9606 GN=RABEP1 PE=1 SV=2	RABEP1	4	3	4	3	3	99.2	1.84046e+06	2.56936e+06	2.22847e+06	1.65714e+06	1.11027e+06		150949	834942	3.79478e+06	1.70058e+06	1.92787e+06	1.17467e+06	692424	136394	606832	1.074	4.638	5.645	1.757	0.766		0.13	0.64	4.747	1.081	1.615	0.515	0.29	0.083	0.532	0.386	0.058123	nucleus	K12480	RABEP1; Rab GTPase-binding effector protein 1	hsa04144 Endocytosis	GO:0006810 transport; GO:0006897 endocytosis; GO:0009987 cellular process; GO:0016043 cellular component organization; GO:0016192 vesicle-mediated transport; GO:0051179 localization; GO:0051234 establishment of localization; GO:0061024 membrane organization; GO:0061025 membrane fusion; GO:0071840 cellular component organization or biogenesis; GO:0098657 import into cell;	GO:0005622 intracellular; GO:0005623 cell; GO:0005737 cytoplasm; GO:0005768 endosome; GO:0005769 early endosome; GO:0010008 endosome membrane; GO:0012505 endomembrane system; GO:0016020 membrane; GO:0030139 endocytic vesicle; GO:0031090 organelle membrane; GO:0031410 cytoplasmic vesicle; GO:0031901 early endosome membrane; GO:0031982 vesicle; GO:0032991 protein-containing complex; GO:0043226 orga…	GO:0005488 binding; GO:0005515 protein binding; GO:0019904 protein domain specific binding; GO:0042802 identical protein binding; GO:0042803 protein homodimerization activity; GO:0046983 protein dimerization activity;
P63000	Ras-related C3 botulinum toxin substrate 1 OS=Homo sapiens OX=9606 GN=RAC1 PE=1 SV=1	RAC1	42	8	120	4	7	21.4	9.39287e+07	1.36201e+07	4466596	4.90516e+07	54175943	3.71925e+07	4.13777e+07	5.48668e+07	3.53146e+07	7.4317e+07	52214720	7.35336e+07	9.38147e+07	7.37559e+07	6.21864e+07	1.474	0.661	0.304	1.399	1.005	0.88	0.959	1.131	1.188	1.27	1.176	0.867	1.057	1.207	1.466	1.202	0.277444	cytoplasm	K04392	RAC1; Ras-related C3 botulinum toxin substrate 1	hsa05120 Epithelial cell signaling in Helicobacter pylori infection; hsa04666 Fc gamma R-mediated phagocytosis; hsa04014 Ras signaling pathway; hsa04360 Axon guidance; hsa05211 Renal cell carcinoma; hsa05203 Viral carcinogenesis; hsa04650 Natural killer cell mediated cytotoxicity; hsa05200 Pathways in cancer; hsa05415 Diabetic cardiomyopathy; hsa04310 Wnt signaling pathway; hsa05416 Viral myocard…	GO:0000902 cell morphogenesis; GO:0000904 cell morphogenesis involved in differentiation; GO:0001764 neuron migration; GO:0001817 regulation of cytokine production; GO:0001818 negative regulation of cytokine production; GO:0001894 tissue homeostasis; GO:0001932 regulation of protein phosphorylation; GO:0001934 positive regulation of protein phosphorylation; GO:0001952 regulation of cell-matrix ad…	GO:0000139 Golgi membrane; GO:0000242 pericentriolar material; GO:0001726 ruffle; GO:0001891 phagocytic cup; GO:0005622 intracellular; GO:0005623 cell; GO:0005634 nucleus; GO:0005737 cytoplasm; GO:0005768 endosome; GO:0005769 early endosome; GO:0005794 Golgi apparatus; GO:0005802 trans-Golgi network; GO:0005813 centrosome; GO:0005815 microtubule organizing center; GO:0005829 cytosol; GO:0005856 c…	GO:0000166 nucleotide binding; GO:0001882 nucleoside binding; GO:0001883 purine nucleoside binding; GO:0003824 catalytic activity; GO:0003924 GTPase activity; GO:0005488 binding; GO:0005515 protein binding; GO:0005525 GTP binding; GO:0016462 pyrophosphatase activity; GO:0016787 hydrolase activity; GO:0016817 hydrolase activity, acting on acid anhydrides; GO:0016818 hydrolase activity, acting on a…	PF00071	Ras family
Q15382	GTP-binding protein Rheb OS=Homo sapiens OX=9606 GN=RHEB PE=1 SV=1	RHEB	20	4	22	4	4	20.5	4.88591e+06	334595		1.2567e+06	2.94171e+06	2.21291e+06	1.27489e+06	2.19058e+06	701327	2.80194e+06	2394279	4.09463e+06	3.89928e+06	2.82379e+06	1.56193e+06	1.745	0.37		0.816	1.242	1.192	0.672	1.028	0.537	1.09	1.228	1.099	1	1.052	0.838	0.885	0.891468	mitochondria	K07208	RHEB; Ras homolog enriched in brain	hsa04072 Phospholipase D signaling pathway; hsa04150 mTOR signaling pathway; hsa04140 Autophagy - animal; hsa04919 Thyroid hormone signaling pathway; hsa05163 Human cytomegalovirus infection; hsa05231 Choline metabolism in cancer; hsa05168 Herpes simplex virus 1 infection; hsa05165 Human papillomavirus infection; hsa04211 Longevity regulating pathway; hsa04714 Thermogenesis; hsa04218 Cellular sen…	GO:0007049 cell cycle; GO:0007050 cell cycle arrest; GO:0007154 cell communication; GO:0007165 signal transduction; GO:0007264 small GTPase mediated signal transduction; GO:0007275 multicellular organism development; GO:0007399 nervous system development; GO:0009894 regulation of catabolic process; GO:0009966 regulation of signal transduction; GO:0009967 positive regulation of signal transduction…	GO:0000323 lytic vacuole; GO:0005622 intracellular; GO:0005623 cell; GO:0005634 nucleus; GO:0005681 spliceosomal complex; GO:0005737 cytoplasm; GO:0005764 lysosome; GO:0005765 lysosomal membrane; GO:0005773 vacuole; GO:0005774 vacuolar membrane; GO:0016020 membrane; GO:0030425 dendrite; GO:0031090 organelle membrane; GO:0032991 protein-containing complex; GO:0036477 somatodendritic compartment; G…	GO:0000166 nucleotide binding; GO:0000287 magnesium ion binding; GO:0001882 nucleoside binding; GO:0001883 purine nucleoside binding; GO:0003824 catalytic activity; GO:0003924 GTPase activity; GO:0005488 binding; GO:0005515 protein binding; GO:0005525 GTP binding; GO:0016462 pyrophosphatase activity; GO:0016787 hydrolase activity; GO:0016817 hydrolase activity, acting on acid anhydrides; GO:00168…	PF00071	Ras family
P84095	Rho-related GTP-binding protein RhoG OS=Homo sapiens OX=9606 GN=RHOG PE=1 SV=1	RHOG	51	7	96	6	6	21.3	2.31596e+07	3.91659e+06	496676	1.02107e+07	8.07187e+06	1.01304e+07	6060467	5.21248e+06	2.81195e+06	1.32678e+07	1.01651e+07	1.45241e+07	1.94786e+07	1.51883e+07	1.06358e+07	1.929	1.009	0.18	1.545	0.795	1.272	0.745	0.57	0.502	1.204	1.215	0.909	1.165	1.319	1.33	0.887	0.902208	cytoplasm	K07863	RHOG; Ras homolog gene family, member G	hsa05100 Bacterial invasion of epithelial cells; hsa05132 Salmonella infection; hsa05135 Yersinia infection	GO:0001775 cell activation; GO:0002252 immune effector process; GO:0002263 cell activation involved in immune response; GO:0002274 myeloid leukocyte activation; GO:0002275 myeloid cell activation involved in immune response; GO:0002283 neutrophil activation involved in immune response; GO:0002366 leukocyte activation involved in immune response; GO:0002376 immune system process; GO:0002443 leukoc…	GO:0005622 intracellular; GO:0005623 cell; GO:0005737 cytoplasm; GO:0005783 endoplasmic reticulum; GO:0005789 endoplasmic reticulum membrane; GO:0005829 cytosol; GO:0005886 plasma membrane; GO:0012505 endomembrane system; GO:0012506 vesicle membrane; GO:0016020 membrane; GO:0030141 secretory granule; GO:0030659 cytoplasmic vesicle membrane; GO:0030667 secretory granule membrane; GO:0031090 organe…	GO:0003824 catalytic activity; GO:0003924 GTPase activity; GO:0016462 pyrophosphatase activity; GO:0016787 hydrolase activity; GO:0016817 hydrolase activity, acting on acid anhydrides; GO:0016818 hydrolase activity, acting on acid anhydrides, in phosphorus-containing anhydrides; GO:0017111 nucleoside-triphosphatase activity;	PF00071	Ras family
O43665	Regulator of G-protein signaling 10 OS=Homo sapiens OX=9606 GN=RGS10 PE=1 SV=3	RGS10	9	1	5	1	1	21.2	165163	137275		217570	470428	333454	439588	635282		574681			471097	466903	352194																		nucleus	K16449			GO:0001975 response to amphetamine; GO:0007154 cell communication; GO:0007165 signal transduction; GO:0007186 G protein-coupled receptor signaling pathway; GO:0007213 G protein-coupled acetylcholine receptor signaling pathway; GO:0008277 regulation of G protein-coupled receptor signaling pathway; GO:0009410 response to xenobiotic stimulus; GO:0009636 response to toxic substance; GO:0009719 respon…	GO:0005622 intracellular; GO:0005623 cell; GO:0005634 nucleus; GO:0005737 cytoplasm; GO:0005829 cytosol; GO:0005886 plasma membrane; GO:0016020 membrane; GO:0030424 axon; GO:0030425 dendrite; GO:0036477 somatodendritic compartment; GO:0042995 cell projection; GO:0043005 neuron projection; GO:0043025 neuronal cell body; GO:0043197 dendritic spine; GO:0043226 organelle; GO:0043227 membrane-bounded …	GO:0001965 G-protein alpha-subunit binding; GO:0005096 GTPase activator activity; GO:0005488 binding; GO:0005515 protein binding; GO:0008047 enzyme activator activity; GO:0030234 enzyme regulator activity; GO:0030695 GTPase regulator activity; GO:0060589 nucleoside-triphosphatase regulator activity; GO:0098772 molecular function regulator;	PF00615	Regulator of G protein signaling domain
Q3B726	DNA-directed RNA polymerase I subunit RPA43 OS=Homo sapiens OX=9606 GN=POLR1F PE=1 SV=1	POLR1F	5	2	4	2	2	37.4	604378	3.38998e+06		476917	495685		120755	180356	107149	817876		1.38547e+06	1.0027e+06	1.46042e+06	299540	0.597	10.36		0.856	0.579		0.176	0.234	0.227	0.88		1.028	0.711	1.505	0.444	0.21	0.148393	nucleus	K03004	RPA43; DNA-directed RNA polymerase I subunit RPA43	hsa03020 RNA polymerase	GO:0006139 nucleobase-containing compound metabolic process; GO:0006351 transcription, DNA-templated; GO:0006352 DNA-templated transcription, initiation; GO:0006353 DNA-templated transcription, termination; GO:0006360 transcription by RNA polymerase I; GO:0006361 transcription initiation from RNA polymerase I promoter; GO:0006363 termination of RNA polymerase I transcription; GO:0006725 cellular …	GO:0000428 DNA-directed RNA polymerase complex; GO:0005622 intracellular; GO:0005623 cell; GO:0005634 nucleus; GO:0005654 nucleoplasm; GO:0005730 nucleolus; GO:0005736 RNA polymerase I complex; GO:0030880 RNA polymerase complex; GO:0031974 membrane-enclosed lumen; GO:0031981 nuclear lumen; GO:0032991 protein-containing complex; GO:0043226 organelle; GO:0043227 membrane-bounded organelle; GO:00432…		PF03876	SHS2 domain found in N terminus of Rpb7p/Rpc25p/MJ0397
O00584	Ribonuclease T2 OS=Homo sapiens OX=9606 GN=RNASET2 PE=1 SV=2	RNASET2	10	2	19	2	2	29.5	332270	364399		600859	63499.2	1.01933e+06	357603		417757	1.29334e+06	1.04211e+06	152245	918227	1.13553e+06	1.04759e+06	0.421	1.427		1.382	0.095	1.945	0.668		1.134	1.783	1.893	0.145	0.834	1.499	1.991	1.18	0.545461	extracellular	K01166			GO:0001775 cell activation; GO:0002252 immune effector process; GO:0002263 cell activation involved in immune response; GO:0002274 myeloid leukocyte activation; GO:0002275 myeloid cell activation involved in immune response; GO:0002283 neutrophil activation involved in immune response; GO:0002366 leukocyte activation involved in immune response; GO:0002376 immune system process; GO:0002443 leukoc…	GO:0000323 lytic vacuole; GO:0005576 extracellular region; GO:0005615 extracellular space; GO:0005622 intracellular; GO:0005623 cell; GO:0005737 cytoplasm; GO:0005764 lysosome; GO:0005766 primary lysosome; GO:0005773 vacuole; GO:0005775 vacuolar lumen; GO:0005783 endoplasmic reticulum; GO:0005788 endoplasmic reticulum lumen; GO:0012505 endomembrane system; GO:0030141 secretory granule; GO:0031410…	GO:0003824 catalytic activity; GO:0004518 nuclease activity; GO:0004540 ribonuclease activity; GO:0016787 hydrolase activity; GO:0016788 hydrolase activity, acting on ester bonds; GO:0140098 catalytic activity, acting on RNA;	PF00445	Ribonuclease T2 family
Q96DM3	Regulator of MON1-CCZ1 complex OS=Homo sapiens OX=9606 GN=RMC1 PE=1 SV=2	RMC1	5	2	3	2	2	74.9	443534	60522.8			728907	104867	332513	640234		289837	327298	738721	823275	763865	323004	0.813	0.343			1.578	0.29	0.899	1.541		0.578	0.861	1.017	1.083	1.459	0.889	1.377	0.28833	cytoplasm	K24763			GO:0009894 regulation of catabolic process; GO:0010506 regulation of autophagy; GO:0019222 regulation of metabolic process; GO:0031323 regulation of cellular metabolic process; GO:0031329 regulation of cellular catabolic process; GO:0050789 regulation of biological process; GO:0050794 regulation of cellular process; GO:0065007 biological regulation;	GO:0005622 intracellular; GO:0005623 cell; GO:0005737 cytoplasm; GO:0005768 endosome; GO:0005770 late endosome; GO:0010008 endosome membrane; GO:0012505 endomembrane system; GO:0016020 membrane; GO:0031090 organelle membrane; GO:0031410 cytoplasmic vesicle; GO:0031902 late endosome membrane; GO:0031982 vesicle; GO:0032991 protein-containing complex; GO:0035658 Mon1-Ccz1 complex; GO:0043226 organe…
Q9GZS1	DNA-directed RNA polymerase I subunit RPA49 OS=Homo sapiens OX=9606 GN=POLR1E PE=1 SV=3	POLR1E	2	1	5	1	1	47.2					162540	166786	343153	280406	268843	526036	439430	1.3814e+06	1.11309e+06	396863	78647.2																		nucleus	K03005	RPA49; DNA-directed RNA polymerase I subunit RPA49	hsa03020 RNA polymerase	GO:0001188 RNA polymerase I preinitiation complex assembly; GO:0006139 nucleobase-containing compound metabolic process; GO:0006351 transcription, DNA-templated; GO:0006352 DNA-templated transcription, initiation; GO:0006353 DNA-templated transcription, termination; GO:0006360 transcription by RNA polymerase I; GO:0006361 transcription initiation from RNA polymerase I promoter; GO:0006363 termina…	GO:0000428 DNA-directed RNA polymerase complex; GO:0001650 fibrillar center; GO:0005622 intracellular; GO:0005623 cell; GO:0005634 nucleus; GO:0005654 nucleoplasm; GO:0005730 nucleolus; GO:0005736 RNA polymerase I complex; GO:0030880 RNA polymerase complex; GO:0031974 membrane-enclosed lumen; GO:0031981 nuclear lumen; GO:0032991 protein-containing complex; GO:0043226 organelle; GO:0043227 membran…	GO:0001179 RNA polymerase I general transcription initiation factor binding; GO:0005488 binding; GO:0005515 protein binding; GO:0008134 transcription factor binding;
Q96DB5	Regulator of microtubule dynamics protein 1 OS=Homo sapiens OX=9606 GN=RMDN1 PE=1 SV=1	RMDN1	10	3	7	3	3	35.8			334435					315292		724034		1.92212e+06	1.26064e+06					1.356					0.387		0.737		1.349	0.846			0.612		mitochondria
P62917	60S ribosomal protein L8 OS=Homo sapiens OX=9606 GN=RPL8 PE=1 SV=2	RPL8	59	13	158	13	13	28	1.19503e+08	2.31113e+07	2.7942e+07	2.59095e+07	8.76291e+07	3.93105e+07	1.10929e+08	1.36644e+08	4.44568e+07	1.6777e+08	2.59671e+07	3.14198e+08	2.54774e+08	1.73462e+08	8.98086e+07	0.93	0.556	0.944	0.366	0.806	0.461	1.274	1.397	0.742	1.422	0.29	1.837	1.423	1.407	1.049	1.779	0.0635481	cytoplasm	K02938	RP-L8e; large subunit ribosomal protein L8e	hsa03010 Ribosome; hsa05171 Coronavirus disease - COVID-19	GO:0000184 nuclear-transcribed mRNA catabolic process, nonsense-mediated decay; GO:0000956 nuclear-transcribed mRNA catabolic process; GO:0002181 cytoplasmic translation; GO:0006139 nucleobase-containing compound metabolic process; GO:0006401 RNA catabolic process; GO:0006402 mRNA catabolic process; GO:0006412 translation; GO:0006413 translational initiation; GO:0006518 peptide metabolic process;…	GO:0005622 intracellular; GO:0005623 cell; GO:0005737 cytoplasm; GO:0005829 cytosol; GO:0005840 ribosome; GO:0005844 polysome; GO:0015934 large ribosomal subunit; GO:0022625 cytosolic large ribosomal subunit; GO:0022626 cytosolic ribosome; GO:0032991 protein-containing complex; GO:0042788 polysomal ribosome; GO:0043226 organelle; GO:0043228 non-membrane-bounded organelle; GO:0043229 intracellular…	GO:0003676 nucleic acid binding; GO:0003723 RNA binding; GO:0003735 structural constituent of ribosome; GO:0005198 structural molecule activity; GO:0005488 binding; GO:0019843 rRNA binding; GO:0097159 organic cyclic compound binding; GO:1901363 heterocyclic compound binding; GO:1990932 5.8S rRNA binding;	PF00181; PF03947	Ribosomal Proteins L2, RNA binding domain; Ribosomal Proteins L2, C-terminal domain
Q9Y3U8	60S ribosomal protein L36 OS=Homo sapiens OX=9606 GN=RPL36 PE=1 SV=3	RPL36	30	5	129	5	5	12.2	4.63945e+07	4.1266e+06	4.54305e+06	8.72517e+06	1.97617e+07	1.52498e+07	2.25307e+07	2.37532e+07	1.2799e+07	2.16342e+07	2.43113e+07	5.58846e+07	6.07717e+07	4.2558e+07	2.23969e+07	1.537	0.423	0.653	0.525	0.774	0.762	1.102	1.034	0.909	0.781	1.156	1.391	1.446	1.47	1.114	1.484	0.0169883	nucleus	K02920	RP-L36e; large subunit ribosomal protein L36e	hsa03010 Ribosome; hsa05171 Coronavirus disease - COVID-19	GO:0000184 nuclear-transcribed mRNA catabolic process, nonsense-mediated decay; GO:0000956 nuclear-transcribed mRNA catabolic process; GO:0002181 cytoplasmic translation; GO:0006139 nucleobase-containing compound metabolic process; GO:0006401 RNA catabolic process; GO:0006402 mRNA catabolic process; GO:0006412 translation; GO:0006413 translational initiation; GO:0006518 peptide metabolic process;…	GO:0005622 intracellular; GO:0005623 cell; GO:0005634 nucleus; GO:0005730 nucleolus; GO:0005737 cytoplasm; GO:0005829 cytosol; GO:0005840 ribosome; GO:0005844 polysome; GO:0015934 large ribosomal subunit; GO:0022625 cytosolic large ribosomal subunit; GO:0022626 cytosolic ribosome; GO:0031974 membrane-enclosed lumen; GO:0031981 nuclear lumen; GO:0032991 protein-containing complex; GO:0042788 polys…	GO:0003676 nucleic acid binding; GO:0003723 RNA binding; GO:0003735 structural constituent of ribosome; GO:0005198 structural molecule activity; GO:0005488 binding; GO:0097159 organic cyclic compound binding; GO:1901363 heterocyclic compound binding;
Q8IW75	Serpin A12 OS=Homo sapiens OX=9606 GN=SERPINA12 PE=1 SV=1	SERPINA12	12	5	30	5	5	47.1	487135	7.74491e+06	2.23705e+07	1.42926e+07	3.02986e+07	663637	2.72533e+06	2.21019e+06	540649	2.25908e+06	6.6161e+06	1.8342e+06	1929121	4.71379e+06	3.81503e+06	0.061	2.985	12.1	3.236	4.461	0.125	0.501	0.362	0.144	0.307	1.183	0.172	0.173	0.612	0.714	0.121	0.129816	endoplasmic reticulum	K04525			GO:0005975 carbohydrate metabolic process; GO:0005996 monosaccharide metabolic process; GO:0006006 glucose metabolic process; GO:0006109 regulation of carbohydrate metabolic process; GO:0006111 regulation of gluconeogenesis; GO:0008152 metabolic process; GO:0009889 regulation of biosynthetic process; GO:0009890 negative regulation of biosynthetic process; GO:0009892 negative regulation of metabol…	GO:0005576 extracellular region; GO:0005615 extracellular space; GO:0005623 cell; GO:0005886 plasma membrane; GO:0016020 membrane; GO:0071944 cell periphery;	GO:0004857 enzyme inhibitor activity; GO:0004866 endopeptidase inhibitor activity; GO:0004867 serine-type endopeptidase inhibitor activity; GO:0030234 enzyme regulator activity; GO:0030414 peptidase inhibitor activity; GO:0061134 peptidase regulator activity; GO:0061135 endopeptidase regulator activity; GO:0098772 molecular function regulator;	PF00079	Serpin (serine protease inhibitor)
Q9UMY4	Sorting nexin-12 OS=Homo sapiens OX=9606 GN=SNX12 PE=1 SV=4	SNX12	40	8	90	6	6	18.9	1.03162e+07	892626	1.56878e+06	4.53528e+06	1.18521e+07	7.35329e+06	7.01918e+06	1.55501e+07	5.96142e+06	1.36529e+07	7.29286e+06	1.96087e+07	1.59864e+07	1.57964e+07	1.19963e+07	0.882	0.236	0.582	0.705	1.197	0.948	0.886	1.747	1.093	1.271	0.895	1.259	0.981	1.408	1.54	1.623	0.018431	cytoplasm	K17918	SNX3_12; sorting nexin-3/12	hsa04144 Endocytosis	GO:0006810 transport; GO:0006897 endocytosis; GO:0006996 organelle organization; GO:0009892 negative regulation of metabolic process; GO:0009894 regulation of catabolic process; GO:0009895 negative regulation of catabolic process; GO:0009987 cellular process; GO:0010468 regulation of gene expression; GO:0010605 negative regulation of macromolecule metabolic process; GO:0010629 negative regulation…	GO:0005622 intracellular; GO:0005623 cell; GO:0005737 cytoplasm; GO:0005768 endosome; GO:0005769 early endosome; GO:0012505 endomembrane system; GO:0016020 membrane; GO:0019898 extrinsic component of membrane; GO:0031410 cytoplasmic vesicle; GO:0031982 vesicle; GO:0043226 organelle; GO:0043227 membrane-bounded organelle; GO:0043229 intracellular organelle; GO:0097708 intracellular vesicle;	GO:0005488 binding; GO:0005515 protein binding; GO:0005543 phospholipid binding; GO:0008289 lipid binding; GO:0019899 enzyme binding; GO:0035091 phosphatidylinositol binding; GO:0043167 ion binding; GO:0043168 anion binding;	PF00787	PX domain
Q969G3	SWI/SNF-related matrix-associated actin-dependent regulator of chromatin subfamily E member 1 OS=Homo sapiens OX=9606 GN=SMARCE1 PE=1 SV=2	SMARCE1	11	4	17	3	3	46.6	3.21024e+06	419310			1.29144e+06							2.896e+06	2583169	1.72128e+06		1.353	0.547			0.643							0.917	0.782	0.756		0.965	0.886282	nucleus	K11651	SMARCE1; SWI/SNF-related matrix-associated actin-dependent regulator of chromatin subfamily E, member 1	hsa05225 Hepatocellular carcinoma; hsa04714 Thermogenesis	GO:0000003 reproduction; GO:0003006 developmental process involved in reproduction; GO:0006325 chromatin organization; GO:0006333 chromatin assembly or disassembly; GO:0006337 nucleosome disassembly; GO:0006338 chromatin remodeling; GO:0006355 regulation of transcription, DNA-templated; GO:0006357 regulation of transcription by RNA polymerase II; GO:0006996 organelle organization; GO:0007275 mult…	GO:0000228 nuclear chromosome; GO:0000785 chromatin; GO:0000790 nuclear chromatin; GO:0005622 intracellular; GO:0005623 cell; GO:0005634 nucleus; GO:0005654 nucleoplasm; GO:0005694 chromosome; GO:0016514 SWI/SNF complex; GO:0017053 transcription repressor complex; GO:0031974 membrane-enclosed lumen; GO:0031981 nuclear lumen; GO:0032991 protein-containing complex; GO:0043226 organelle; GO:0043227 …	GO:0000981 DNA-binding transcription factor activity, RNA polymerase II-specific; GO:0003676 nucleic acid binding; GO:0003682 chromatin binding; GO:0003700 DNA-binding transcription factor activity; GO:0003712 transcription coregulator activity; GO:0003713 transcription coactivator activity; GO:0003723 RNA binding; GO:0003824 catalytic activity; GO:0005102 signaling receptor binding; GO:0005488 b…	PF00505	HMG (high mobility group) box
Q12824	SWI/SNF-related matrix-associated actin-dependent regulator of chromatin subfamily B member 1 OS=Homo sapiens OX=9606 GN=SMARCB1 PE=1 SV=2	SMARCB1	7	3	13	3	3	44.1	1.28558e+07	1.65594e+06		3.14356e+06	5.3775e+06	4.03911e+06	4.40341e+06	8.71069e+06	1.58618e+06	1.07362e+07	7.47355e+06	1.55651e+07	1.82617e+07	9.61411e+06	6.25323e+06	1.397	0.557		0.621	0.691	0.662	0.706	1.244	0.37	1.271	1.166	1.271	1.425	1.09	1.021	1.353	0.210169	cytoplasm	K11648	SMARCB1; SWI/SNF-related matrix-associated actin-dependent regulator of chromatin subfamily B member 1	hsa05225 Hepatocellular carcinoma; hsa04714 Thermogenesis	GO:0001188 RNA polymerase I preinitiation complex assembly; GO:0001701 in utero embryonic development; GO:0001824 blastocyst development; GO:0001835 blastocyst hatching; GO:0006139 nucleobase-containing compound metabolic process; GO:0006259 DNA metabolic process; GO:0006281 DNA repair; GO:0006325 chromatin organization; GO:0006333 chromatin assembly or disassembly; GO:0006337 nucleosome disassem…	GO:0000228 nuclear chromosome; GO:0000785 chromatin; GO:0000790 nuclear chromatin; GO:0000803 sex chromosome; GO:0001650 fibrillar center; GO:0001741 XY body; GO:0005622 intracellular; GO:0005623 cell; GO:0005634 nucleus; GO:0005654 nucleoplasm; GO:0005694 chromosome; GO:0005730 nucleolus; GO:0016514 SWI/SNF complex; GO:0031974 membrane-enclosed lumen; GO:0031981 nuclear lumen; GO:0032991 protein…	GO:0000976 transcription regulatory region sequence-specific DNA binding; GO:0001046 core promoter sequence-specific DNA binding; GO:0001067 regulatory region nucleic acid binding; GO:0001163 RNA polymerase I transcription regulatory region sequence-specific DNA binding; GO:0001164 RNA polymerase I core promoter sequence-specific DNA binding; GO:0002039 p53 binding; GO:0003676 nucleic acid bindin…
Q92629	Delta-sarcoglycan OS=Homo sapiens OX=9606 GN=SGCD PE=1 SV=2	SGCD	16	4	12	4	4	32.1	2.32549e+06	278555		293294	1.36911e+06	313274	1.11955e+06	358680	334061	2.60229e+06	586708	417399	2.74888e+06	1.30394e+06		1.832	0.679		0.42	1.275	0.372	1.302	0.371	0.564	2.232	0.663	0.247	1.555	1.071		1.093	0.898295	mitochondria	K12563	SGCD; delta-sarcoglycan	hsa05410 Hypertrophic cardiomyopathy; hsa05416 Viral myocarditis; hsa05412 Arrhythmogenic right ventricular cardiomyopathy; hsa05414 Dilated cardiomyopathy	GO:0003008 system process; GO:0003013 circulatory system process; GO:0003015 heart process; GO:0007275 multicellular organism development; GO:0007507 heart development; GO:0007517 muscle organ development; GO:0008015 blood circulation; GO:0009888 tissue development; GO:0009987 cellular process; GO:0014706 striated muscle tissue development; GO:0016043 cellular component organization; GO:0030154 c…	GO:0005622 intracellular; GO:0005623 cell; GO:0005856 cytoskeleton; GO:0005886 plasma membrane; GO:0005887 integral component of plasma membrane; GO:0016010 dystrophin-associated glycoprotein complex; GO:0016011 dystroglycan complex; GO:0016012 sarcoglycan complex; GO:0016020 membrane; GO:0016021 integral component of membrane; GO:0031224 intrinsic component of membrane; GO:0031226 intrinsic comp…
O95363	Phenylalanine--tRNA ligase, mitochondrial OS=Homo sapiens OX=9606 GN=FARS2 PE=1 SV=1	FARS2	2	1	2	1	1	52.3	164825			185752			238650			254217	192172	501521	341158	203989	197794																		mitochondria	K01889	FARSA; phenylalanyl-tRNA synthetase alpha chain [EC:6.1.1.20]	hsa00970 Aminoacyl-tRNA biosynthesis	GO:0006082 organic acid metabolic process; GO:0006139 nucleobase-containing compound metabolic process; GO:0006396 RNA processing; GO:0006399 tRNA metabolic process; GO:0006412 translation; GO:0006418 tRNA aminoacylation for protein translation; GO:0006432 phenylalanyl-tRNA aminoacylation; GO:0006518 peptide metabolic process; GO:0006520 cellular amino acid metabolic process; GO:0006725 cellular …	GO:0005622 intracellular; GO:0005623 cell; GO:0005737 cytoplasm; GO:0005739 mitochondrion; GO:0005759 mitochondrial matrix; GO:0031974 membrane-enclosed lumen; GO:0043226 organelle; GO:0043227 membrane-bounded organelle; GO:0043229 intracellular organelle; GO:0043231 intracellular membrane-bounded organelle; GO:0043233 organelle lumen; GO:0070013 intracellular organelle lumen;	GO:0000049 tRNA binding; GO:0003676 nucleic acid binding; GO:0003723 RNA binding; GO:0003824 catalytic activity; GO:0004812 aminoacyl-tRNA ligase activity; GO:0004826 phenylalanine-tRNA ligase activity; GO:0005488 binding; GO:0016874 ligase activity; GO:0016875 ligase activity, forming carbon-oxygen bonds; GO:0097159 organic cyclic compound binding; GO:0140098 catalytic activity, acting on RNA; G…	PF01409; PF03147	tRNA synthetases class II core domain (F); Ferredoxin-fold anticodon binding domain
Q8IWV7	E3 ubiquitin-protein ligase UBR1 OS=Homo sapiens OX=9606 GN=UBR1 PE=1 SV=1	UBR1	0	1	2	1	1	200.1	214685	53248.9	87276.2			100140	84724.1	102191			96472.1	259680	246438																				plasma membrane	K10625			GO:0001101 response to acid chemical; GO:0006464 cellular protein modification process; GO:0006508 proteolysis; GO:0006511 ubiquitin-dependent protein catabolic process; GO:0006807 nitrogen compound metabolic process; GO:0008152 metabolic process; GO:0009056 catabolic process; GO:0009057 macromolecule catabolic process; GO:0009719 response to endogenous stimulus; GO:0009966 regulation of signal t…	GO:0000151 ubiquitin ligase complex; GO:0000502 proteasome complex; GO:0005622 intracellular; GO:0005623 cell; GO:0005737 cytoplasm; GO:0032991 protein-containing complex; GO:1902494 catalytic complex; GO:1905368 peptidase complex; GO:1905369 endopeptidase complex; GO:1990234 transferase complex;	GO:0003824 catalytic activity; GO:0004842 ubiquitin-protein transferase activity; GO:0005488 binding; GO:0016597 amino acid binding; GO:0016740 transferase activity; GO:0019787 ubiquitin-like protein transferase activity; GO:0031406 carboxylic acid binding; GO:0036094 small molecule binding; GO:0043167 ion binding; GO:0043168 anion binding; GO:0043169 cation binding; GO:0043177 organic acid bindi…
O94811	Tubulin polymerization-promoting protein OS=Homo sapiens OX=9606 GN=TPPP PE=1 SV=1	TPPP	11	2	2	2	2	23.7		389447	571415	692932	1.58239e+06	188024	234773			571371	397333			140836			1.936	3.986	2.023	3.005	0.456	0.557			1	0.917			0.236		0.297	0.0618408	nucleus				GO:0000226 microtubule cytoskeleton organization; GO:0001578 microtubule bundle formation; GO:0006996 organelle organization; GO:0007010 cytoskeleton organization; GO:0007017 microtubule-based process; GO:0009987 cellular process; GO:0016043 cellular component organization; GO:0022607 cellular component assembly; GO:0031109 microtubule polymerization or depolymerization; GO:0031334 positive regul…	GO:0005622 intracellular; GO:0005623 cell; GO:0005634 nucleus; GO:0005737 cytoplasm; GO:0005739 mitochondrion; GO:0005829 cytosol; GO:0005856 cytoskeleton; GO:0043209 myelin sheath; GO:0043226 organelle; GO:0043227 membrane-bounded organelle; GO:0043228 non-membrane-bounded organelle; GO:0043229 intracellular organelle; GO:0043231 intracellular membrane-bounded organelle; GO:0043232 intracellular…	GO:0005488 binding; GO:0005515 protein binding; GO:0008017 microtubule binding; GO:0008092 cytoskeletal protein binding; GO:0015631 tubulin binding;	PF05517	p25-alpha
O00635	E3 ubiquitin-protein ligase TRIM38 OS=Homo sapiens OX=9606 GN=TRIM38 PE=1 SV=1	TRIM38	5	2	2	2	2	53.4	378177			288084	213090	450792	8735.12	1.59448e+06		1242433	2.48103e+06	347208	2389211	960374	480195	0.357			0.494	0.237	0.641	0.012	1.976		1.276	3.359	0.246	1.618	0.944	0.68	2.924	0.63799	nucleus	K12014			GO:0002376 immune system process; GO:0006355 regulation of transcription, DNA-templated; GO:0006950 response to stress; GO:0006952 defense response; GO:0006955 immune response; GO:0007154 cell communication; GO:0007165 signal transduction; GO:0007166 cell surface receptor signaling pathway; GO:0009889 regulation of biosynthetic process; GO:0009966 regulation of signal transduction; GO:0009967 pos…	GO:0005622 intracellular; GO:0005623 cell; GO:0005737 cytoplasm; GO:0005829 cytosol;		PF00643	B-box zinc finger
Q9UBP6	tRNA (guanine-N(7)-)-methyltransferase OS=Homo sapiens OX=9606 GN=METTL1 PE=1 SV=1	METTL1	16	4	14	4	4	31.5	803998		291361	159445	1.34119e+06	537390	577019	1.0962e+06	484373	804134	712336	3.40764e+06	2.59619e+06	1.86577e+06	386638	0.636		1.001	0.229	1.254	0.641	0.674	1.14	0.822	0.693	0.809	2.026	1.475	1.539	0.459	1.424	0.214571	nucleus	K03439			GO:0001510 RNA methylation; GO:0006139 nucleobase-containing compound metabolic process; GO:0006396 RNA processing; GO:0006399 tRNA metabolic process; GO:0006400 tRNA modification; GO:0006725 cellular aromatic compound metabolic process; GO:0006807 nitrogen compound metabolic process; GO:0008033 tRNA processing; GO:0008152 metabolic process; GO:0009451 RNA modification; GO:0009987 cellular proces…	GO:0005622 intracellular; GO:0005623 cell; GO:0005634 nucleus; GO:0005654 nucleoplasm; GO:0005730 nucleolus; GO:0005737 cytoplasm; GO:0005829 cytosol; GO:0031974 membrane-enclosed lumen; GO:0031981 nuclear lumen; GO:0032991 protein-containing complex; GO:0034708 methyltransferase complex; GO:0043226 organelle; GO:0043227 membrane-bounded organelle; GO:0043228 non-membrane-bounded organelle; GO:00…	GO:0003824 catalytic activity; GO:0008168 methyltransferase activity; GO:0008173 RNA methyltransferase activity; GO:0008175 tRNA methyltransferase activity; GO:0008176 tRNA (guanine-N7-)-methyltransferase activity; GO:0008757 S-adenosylmethionine-dependent methyltransferase activity; GO:0016423 tRNA (guanine) methyltransferase activity; GO:0016740 transferase activity; GO:0016741 transferase acti…
O14787	Transportin-2 OS=Homo sapiens OX=9606 GN=TNPO2 PE=1 SV=3	TNPO2	5	5	62	1	1	101.3																																	cytoplasm	K18727	TNPO2; transportin-2	hsa03013 Nucleocytoplasmic transport	GO:0006606 protein import into nucleus; GO:0006607 NLS-bearing protein import into nucleus; GO:0006610 ribosomal protein import into nucleus; GO:0006810 transport; GO:0006886 intracellular protein transport; GO:0006913 nucleocytoplasmic transport; GO:0008104 protein localization; GO:0015031 protein transport; GO:0015833 peptide transport; GO:0017038 protein import; GO:0033036 macromolecule locali…	GO:0005622 intracellular; GO:0005623 cell; GO:0005634 nucleus; GO:0005635 nuclear envelope; GO:0005737 cytoplasm; GO:0012505 endomembrane system; GO:0016020 membrane; GO:0031090 organelle membrane; GO:0031965 nuclear membrane; GO:0031967 organelle envelope; GO:0031974 membrane-enclosed lumen; GO:0031975 envelope; GO:0031981 nuclear lumen; GO:0034399 nuclear periphery; GO:0043226 organelle; GO:004…	GO:0005048 signal sequence binding; GO:0005215 transporter activity; GO:0005488 binding; GO:0008139 nuclear localization sequence binding; GO:0033218 amide binding; GO:0042277 peptide binding;
Q9H3N1	Thioredoxin-related transmembrane protein 1 OS=Homo sapiens OX=9606 GN=TMX1 PE=1 SV=1	TMX1	19	6	56	6	6	31.8	2.92146e+07	5.84026e+06	3.02919e+06	6.92802e+06	1.19155e+07	7.39054e+06	1.12879e+07	9.99936e+06	7.19679e+06	1.52095e+07	8.21739e+06	2.12716e+07	2.52339e+07	1.60262e+07	7.53837e+06	2.003	1.238	0.901	0.863	0.965	0.764	1.142	0.901	1.058	1.135	0.809	1.096	1.242	1.146	0.776	0.921	0.784375	extracellular				GO:0006457 protein folding; GO:0006950 response to stress; GO:0008152 metabolic process; GO:0009987 cellular process; GO:0033554 cellular response to stress; GO:0034976 response to endoplasmic reticulum stress; GO:0050896 response to stimulus; GO:0051716 cellular response to stimulus; GO:0055114 oxidation-reduction process;	GO:0005622 intracellular; GO:0005623 cell; GO:0005737 cytoplasm; GO:0005783 endoplasmic reticulum; GO:0005789 endoplasmic reticulum membrane; GO:0012505 endomembrane system; GO:0016020 membrane; GO:0031984 organelle subcompartment; GO:0042175 nuclear outer membrane-endoplasmic reticulum membrane network; GO:0043226 organelle; GO:0043227 membrane-bounded organelle; GO:0043229 intracellular organel…	GO:0003756 protein disulfide isomerase activity; GO:0003824 catalytic activity; GO:0015036 disulfide oxidoreductase activity; GO:0016491 oxidoreductase activity; GO:0016667 oxidoreductase activity, acting on a sulfur group of donors; GO:0016853 isomerase activity; GO:0016860 intramolecular oxidoreductase activity; GO:0016864 intramolecular oxidoreductase activity, transposing S-S bonds; GO:014009…	PF00085	Thioredoxin
Q96HV5	Transmembrane protein 41A OS=Homo sapiens OX=9606 GN=TMEM41A PE=1 SV=1	TMEM41A	4	1	1	1	1	29.6																																	plasma membrane
P17152	Transmembrane protein 11, mitochondrial OS=Homo sapiens OX=9606 GN=TMEM11 PE=1 SV=1	TMEM11	4	1	5	1	1	21.5	525190			107442	382289					529058	342024	1.02462e+06	777902	399993	326961																		plasma membrane				GO:0006996 organelle organization; GO:0007005 mitochondrion organization; GO:0009987 cellular process; GO:0016043 cellular component organization; GO:0071840 cellular component organization or biogenesis;	GO:0005622 intracellular; GO:0005623 cell; GO:0005737 cytoplasm; GO:0005739 mitochondrion; GO:0005740 mitochondrial envelope; GO:0005743 mitochondrial inner membrane; GO:0005886 plasma membrane; GO:0005887 integral component of plasma membrane; GO:0016020 membrane; GO:0016021 integral component of membrane; GO:0019866 organelle inner membrane; GO:0031090 organelle membrane; GO:0031224 intrinsic c…
P53007	Tricarboxylate transport protein, mitochondrial OS=Homo sapiens OX=9606 GN=SLC25A1 PE=1 SV=2	SLC25A1	15	5	15	5	5	34	5.42033e+06	3.60201e+06	5.00028e+06	4.37783e+06	3.78312e+06	9.50697e+06	4.05435e+06	482967	6.94022e+06	2.68494e+06	2.50071e+06	6.87106e+06	3.21723e+06	2.95322e+06	2902402	1.077	2.213	4.311	1.58	0.888	2.847	1.189	0.126	2.955	0.581	0.713	1.025	0.459	0.612	0.866	0.44	0.0319692	plasma membrane	K15100			GO:0005975 carbohydrate metabolic process; GO:0005996 monosaccharide metabolic process; GO:0006006 glucose metabolic process; GO:0006094 gluconeogenesis; GO:0006139 nucleobase-containing compound metabolic process; GO:0006163 purine nucleotide metabolic process; GO:0006164 purine nucleotide biosynthetic process; GO:0006637 acyl-CoA metabolic process; GO:0006725 cellular aromatic compound metaboli…	GO:0005622 intracellular; GO:0005623 cell; GO:0005737 cytoplasm; GO:0005739 mitochondrion; GO:0005740 mitochondrial envelope; GO:0005743 mitochondrial inner membrane; GO:0016020 membrane; GO:0016021 integral component of membrane; GO:0019866 organelle inner membrane; GO:0031090 organelle membrane; GO:0031224 intrinsic component of membrane; GO:0031966 mitochondrial membrane; GO:0031967 organelle …	GO:0005215 transporter activity; GO:0005342 organic acid transmembrane transporter activity; GO:0008509 anion transmembrane transporter activity; GO:0008514 organic anion transmembrane transporter activity; GO:0015075 ion transmembrane transporter activity; GO:0015137 citrate transmembrane transporter activity; GO:0015142 tricarboxylic acid transmembrane transporter activity; GO:0015318 inorganic…
O95071	E3 ubiquitin-protein ligase UBR5 OS=Homo sapiens OX=9606 GN=UBR5 PE=1 SV=2	UBR5	4	9	43	9	9	309.2	2.83989e+07	3.36639e+06	810236	5.29723e+06	1.02422e+07	7.8765e+06	9.91036e+06	8.83209e+06	7.16282e+06	9.96998e+06	1.08523e+07	4.34183e+07	2.89809e+07	2.11199e+07	1.11754e+07	1.748	0.641	0.217	0.593	0.745	0.731	0.901	0.715	0.945	0.669	0.959	2.009	1.281	1.356	1.033	1.407	0.097864	nucleus	K10593	EDD1; E3 ubiquitin-protein ligase EDD1 [EC:2.3.2.26]	hsa04120 Ubiquitin mediated proteolysis	GO:0000209 protein polyubiquitination; GO:0006282 regulation of DNA repair; GO:0006464 cellular protein modification process; GO:0006508 proteolysis; GO:0006511 ubiquitin-dependent protein catabolic process; GO:0006807 nitrogen compound metabolic process; GO:0006950 response to stress; GO:0006974 cellular response to DNA damage stimulus; GO:0007154 cell communication; GO:0007165 signal transducti…	GO:0005622 intracellular; GO:0005623 cell; GO:0005634 nucleus; GO:0005654 nucleoplasm; GO:0005737 cytoplasm; GO:0005829 cytosol; GO:0031974 membrane-enclosed lumen; GO:0031981 nuclear lumen; GO:0032991 protein-containing complex; GO:0043226 organelle; GO:0043227 membrane-bounded organelle; GO:0043229 intracellular organelle; GO:0043231 intracellular membrane-bounded organelle; GO:0043233 organell…	GO:0003824 catalytic activity; GO:0004842 ubiquitin-protein transferase activity; GO:0016740 transferase activity; GO:0019787 ubiquitin-like protein transferase activity; GO:0034450 ubiquitin-ubiquitin ligase activity; GO:0061630 ubiquitin protein ligase activity; GO:0061659 ubiquitin-like protein ligase activity; GO:0140096 catalytic activity, acting on a protein;	PF00632	HECT-domain (ubiquitin-transferase)
Q96JG6	Syndetin OS=Homo sapiens OX=9606 GN=VPS50 PE=1 SV=3	VPS50	4	3	6	3	3	111.1	267820	1.22897e+06		878910	976926	873762	2.0851e+06	1.98808e+06	1.7359e+06	788882	3.66245e+06	730149	995093	752574	725480	0.18	2.562		1.076	0.778	0.888	2.074	1.76	2.507	0.579	3.542	0.37	0.481	0.529	0.734	1.274	0.629463	nucleus	K23288			GO:0006810 transport; GO:0016192 vesicle-mediated transport; GO:0016197 endosomal transport; GO:0032456 endocytic recycling; GO:0046907 intracellular transport; GO:0051179 localization; GO:0051234 establishment of localization; GO:0051641 cellular localization; GO:0051649 establishment of localization in cell;	GO:0005622 intracellular; GO:0005623 cell; GO:0005737 cytoplasm; GO:0005768 endosome; GO:0012505 endomembrane system; GO:0031410 cytoplasmic vesicle; GO:0031982 vesicle; GO:0032991 protein-containing complex; GO:0043226 organelle; GO:0043227 membrane-bounded organelle; GO:0043229 intracellular organelle; GO:0048471 perinuclear region of cytoplasm; GO:0055037 recycling endosome; GO:0097708 intrace…	GO:0000149 SNARE binding; GO:0005488 binding; GO:0005515 protein binding;
A5D8V6	Vacuolar protein sorting-associated protein 37C OS=Homo sapiens OX=9606 GN=VPS37C PE=1 SV=2	VPS37C	3	1	12	1	1	38.6	896516			326350	698733	507007	581653	904551	429383	827579	644634	1160408	1.16962e+06	620966	521411																		nucleus	K12185	VPS37; ESCRT-I complex subunit VPS37	hsa04144 Endocytosis	GO:0006810 transport; GO:0006914 autophagy; GO:0006996 organelle organization; GO:0007032 endosome organization; GO:0008152 metabolic process; GO:0009056 catabolic process; GO:0009987 cellular process; GO:0010256 endomembrane system organization; GO:0016032 viral process; GO:0016043 cellular component organization; GO:0016050 vesicle organization; GO:0016192 vesicle-mediated transport; GO:0016197…	GO:0000813 ESCRT I complex; GO:0005622 intracellular; GO:0005623 cell; GO:0005737 cytoplasm; GO:0005768 endosome; GO:0010008 endosome membrane; GO:0012505 endomembrane system; GO:0016020 membrane; GO:0031090 organelle membrane; GO:0031410 cytoplasmic vesicle; GO:0031982 vesicle; GO:0032991 protein-containing complex; GO:0036452 ESCRT complex; GO:0043226 organelle; GO:0043227 membrane-bounded orga…	GO:0005488 binding; GO:0005515 protein binding; GO:0048306 calcium-dependent protein binding;	PF07200	Modifier of rudimentary (Mod(r)) protein
O00231	26S proteasome non-ATPase regulatory subunit 11 OS=Homo sapiens OX=9606 GN=PSMD11 PE=1 SV=3	PSMD11	45	17	175	17	17	47.4	5.68612e+07	9.46031e+07	7.37573e+06	3.99518e+07	8.12852e+07	5.13078e+07	4.61195e+07	6.54055e+07	1.32066e+08	9.54247e+07	6.90618e+07	1.35069e+08	1.59628e+08	8.75517e+07	5.89831e+07	0.615	3.165	0.346	0.785	1.039	0.837	0.736	0.93	3.062	1.124	1.072	1.098	1.24	0.988	0.958	1.101	0.386197	cytoplasm	K03036	PSMD11; 26S proteasome regulatory subunit N6	hsa05017 Spinocerebellar ataxia; hsa05016 Huntington disease; hsa03050 Proteasome; hsa05169 Epstein-Barr virus infection; hsa05012 Parkinson disease; hsa05010 Alzheimer disease; hsa05022 Pathways of neurodegeneration - multiple diseases; hsa05014 Amyotrophic lateral sclerosis; hsa05020 Prion disease	GO:0001775 cell activation; GO:0002252 immune effector process; GO:0002263 cell activation involved in immune response; GO:0002274 myeloid leukocyte activation; GO:0002275 myeloid cell activation involved in immune response; GO:0002283 neutrophil activation involved in immune response; GO:0002366 leukocyte activation involved in immune response; GO:0002376 immune system process; GO:0002443 leukoc…	GO:0000502 proteasome complex; GO:0005576 extracellular region; GO:0005622 intracellular; GO:0005623 cell; GO:0005634 nucleus; GO:0005654 nucleoplasm; GO:0005737 cytoplasm; GO:0005829 cytosol; GO:0005838 proteasome regulatory particle; GO:0008541 proteasome regulatory particle, lid subcomplex; GO:0012505 endomembrane system; GO:0022624 proteasome accessory complex; GO:0030141 secretory granule; G…	GO:0005198 structural molecule activity;	PF01399	PCI domain
Q13200	26S proteasome non-ATPase regulatory subunit 2 OS=Homo sapiens OX=9606 GN=PSMD2 PE=1 SV=3	PSMD2	33	24	248	24	24	100.1	3.16035e+07	7.97529e+06	9.5564e+06	1.36865e+07	3.5404e+07	2.33967e+07	2.06272e+07	2.68192e+07	1.11136e+07	3.3988e+07	1.51948e+07	6.4589e+07	4.03716e+07	5.5798e+07	2.61256e+07	0.97	0.757	1.273	0.763	1.284	1.082	0.934	1.081	0.731	1.136	0.669	1.489	0.889	1.785	1.204	1.079	0.730988	plasma membrane	K03028	PSMD2; 26S proteasome regulatory subunit N1	hsa05017 Spinocerebellar ataxia; hsa05016 Huntington disease; hsa03050 Proteasome; hsa05169 Epstein-Barr virus infection; hsa05012 Parkinson disease; hsa05010 Alzheimer disease; hsa05022 Pathways of neurodegeneration - multiple diseases; hsa05014 Amyotrophic lateral sclerosis; hsa05020 Prion disease	GO:0001775 cell activation; GO:0002252 immune effector process; GO:0002263 cell activation involved in immune response; GO:0002274 myeloid leukocyte activation; GO:0002275 myeloid cell activation involved in immune response; GO:0002283 neutrophil activation involved in immune response; GO:0002366 leukocyte activation involved in immune response; GO:0002376 immune system process; GO:0002443 leukoc…	GO:0000502 proteasome complex; GO:0005576 extracellular region; GO:0005622 intracellular; GO:0005623 cell; GO:0005634 nucleus; GO:0005654 nucleoplasm; GO:0005737 cytoplasm; GO:0005829 cytosol; GO:0005838 proteasome regulatory particle; GO:0008540 proteasome regulatory particle, base subcomplex; GO:0012505 endomembrane system; GO:0022624 proteasome accessory complex; GO:0030141 secretory granule; …
O00391	Sulfhydryl oxidase 1 OS=Homo sapiens OX=9606 GN=QSOX1 PE=1 SV=3	QSOX1	12	8	42	8	8	82.5	4.0851e+06	1.14895e+07	1.22247e+07	4.49808e+06	7.42794e+06	4.31307e+06	4.64739e+06	7.39359e+06	2.06873e+06	9.63778e+06	6.14799e+06	1.36229e+07	1.09422e+07	8.95334e+06	9.56596e+06	0.446	3.879	5.792	0.892	0.958	0.71	0.749	1.06	0.484	1.146	0.963	1.117	0.857	1.019	1.568	0.471	0.348199	Golgi apparatus	K10758			GO:0001775 cell activation; GO:0002252 immune effector process; GO:0002263 cell activation involved in immune response; GO:0002274 myeloid leukocyte activation; GO:0002275 myeloid cell activation involved in immune response; GO:0002283 neutrophil activation involved in immune response; GO:0002366 leukocyte activation involved in immune response; GO:0002376 immune system process; GO:0002443 leukoc…	GO:0000139 Golgi membrane; GO:0005576 extracellular region; GO:0005615 extracellular space; GO:0005622 intracellular; GO:0005623 cell; GO:0005737 cytoplasm; GO:0005783 endoplasmic reticulum; GO:0005788 endoplasmic reticulum lumen; GO:0005794 Golgi apparatus; GO:0012505 endomembrane system; GO:0016020 membrane; GO:0016021 integral component of membrane; GO:0030141 secretory granule; GO:0030173 int…	GO:0003756 protein disulfide isomerase activity; GO:0003824 catalytic activity; GO:0016491 oxidoreductase activity; GO:0016667 oxidoreductase activity, acting on a sulfur group of donors; GO:0016670 oxidoreductase activity, acting on a sulfur group of donors, oxygen as acceptor; GO:0016853 isomerase activity; GO:0016860 intramolecular oxidoreductase activity; GO:0016864 intramolecular oxidoreduct…	PF00085	Thioredoxin
P30050	60S ribosomal protein L12 OS=Homo sapiens OX=9606 GN=RPL12 PE=1 SV=1	RPL12	61	8	153	8	8	17.8	6.17869e+07	9.2922e+06	3.24838e+06	2.15595e+07	2.91652e+07	3.65761e+07	4.18922e+07	55733829	2.64081e+07	7.90965e+07	6.17267e+07	1.25222e+08	1.19899e+08	1.01101e+08	2.36961e+07	0.991	0.461	0.226	0.628	0.553	0.884	0.992	1.174	0.908	1.381	1.421	1.509	1.381	1.691	0.571	1.964	0.00568608	cytoplasm	K02870	RP-L12e; large subunit ribosomal protein L12e	hsa03010 Ribosome; hsa05171 Coronavirus disease - COVID-19	GO:0000027 ribosomal large subunit assembly; GO:0000184 nuclear-transcribed mRNA catabolic process, nonsense-mediated decay; GO:0000956 nuclear-transcribed mRNA catabolic process; GO:0006139 nucleobase-containing compound metabolic process; GO:0006401 RNA catabolic process; GO:0006402 mRNA catabolic process; GO:0006412 translation; GO:0006413 translational initiation; GO:0006518 peptide metabolic…	GO:0005622 intracellular; GO:0005623 cell; GO:0005634 nucleus; GO:0005730 nucleolus; GO:0005737 cytoplasm; GO:0005829 cytosol; GO:0005840 ribosome; GO:0015934 large ribosomal subunit; GO:0022625 cytosolic large ribosomal subunit; GO:0022626 cytosolic ribosome; GO:0031974 membrane-enclosed lumen; GO:0031981 nuclear lumen; GO:0032991 protein-containing complex; GO:0043226 organelle; GO:0043227 memb…	GO:0003676 nucleic acid binding; GO:0003723 RNA binding; GO:0003735 structural constituent of ribosome; GO:0005198 structural molecule activity; GO:0005488 binding; GO:0019843 rRNA binding; GO:0070180 large ribosomal subunit rRNA binding; GO:0097159 organic cyclic compound binding; GO:1901363 heterocyclic compound binding;	PF03946; PF00298	Ribosomal protein L11, N-terminal domain; Ribosomal protein L11, RNA binding domain
P62906	60S ribosomal protein L10a OS=Homo sapiens OX=9606 GN=RPL10A PE=1 SV=2	RPL10A	36	8	160	8	8	24.8	6.40655e+07	7.64414e+06	861965	1.51898e+07	3.68761e+07	2.47217e+07	3.2739e+07	3.85452e+07	1.8682e+07	5.29277e+07	2.83615e+07	1.24861e+08	9.25029e+07	6.73342e+07	3.34144e+07	1.281	0.473	0.075	0.552	0.871	0.745	0.966	1.013	0.801	1.153	0.814	1.876	1.328	1.404	1.003	1.728	0.0390129	cytoplasm,nucleus	K02865	RP-L10Ae; large subunit ribosomal protein L10Ae	hsa03010 Ribosome; hsa05171 Coronavirus disease - COVID-19	GO:0000184 nuclear-transcribed mRNA catabolic process, nonsense-mediated decay; GO:0000470 maturation of LSU-rRNA; GO:0000956 nuclear-transcribed mRNA catabolic process; GO:0002181 cytoplasmic translation; GO:0006139 nucleobase-containing compound metabolic process; GO:0006364 rRNA processing; GO:0006396 RNA processing; GO:0006401 RNA catabolic process; GO:0006402 mRNA catabolic process; GO:00064…	GO:0005622 intracellular; GO:0005623 cell; GO:0005737 cytoplasm; GO:0005829 cytosol; GO:0005840 ribosome; GO:0005844 polysome; GO:0015934 large ribosomal subunit; GO:0022625 cytosolic large ribosomal subunit; GO:0022626 cytosolic ribosome; GO:0032991 protein-containing complex; GO:0042788 polysomal ribosome; GO:0043226 organelle; GO:0043228 non-membrane-bounded organelle; GO:0043229 intracellular…	GO:0003676 nucleic acid binding; GO:0003723 RNA binding; GO:0003735 structural constituent of ribosome; GO:0005198 structural molecule activity; GO:0005488 binding; GO:0097159 organic cyclic compound binding; GO:1901363 heterocyclic compound binding;	PF00687	Ribosomal protein L1p/L10e family
P31350	Ribonucleoside-diphosphate reductase subunit M2 OS=Homo sapiens OX=9606 GN=RRM2 PE=1 SV=1	RRM2	3	1	1	1	1	44.8																																	cytoplasm	K10808	RRM2; ribonucleoside-diphosphate reductase subunit M2 [EC:1.17.4.1]	hsa00983 Drug metabolism - other enzymes; hsa00480 Glutathione metabolism; hsa00240 Pyrimidine metabolism; hsa04115 p53 signaling pathway; hsa00230 Purine metabolism; hsa01100 Metabolic pathways	GO:0000082 G1/S transition of mitotic cell cycle; GO:0000083 regulation of transcription involved in G1/S transition of mitotic cell cycle; GO:0000278 mitotic cell cycle; GO:0006139 nucleobase-containing compound metabolic process; GO:0006355 regulation of transcription, DNA-templated; GO:0006725 cellular aromatic compound metabolic process; GO:0006753 nucleoside phosphate metabolic process; GO:0…	GO:0005622 intracellular; GO:0005623 cell; GO:0005737 cytoplasm; GO:0005829 cytosol; GO:0005971 ribonucleoside-diphosphate reductase complex; GO:0032991 protein-containing complex; GO:1902494 catalytic complex; GO:1990204 oxidoreductase complex;	GO:0003824 catalytic activity; GO:0004748 ribonucleoside-diphosphate reductase activity, thioredoxin disulfide as acceptor; GO:0016491 oxidoreductase activity; GO:0016725 oxidoreductase activity, acting on CH or CH2 groups; GO:0016728 oxidoreductase activity, acting on CH or CH2 groups, disulfide as acceptor; GO:0061731 ribonucleoside-diphosphate reductase activity;	PF00268	Ribonucleotide reductase, small chain
P27635	60S ribosomal protein L10 OS=Homo sapiens OX=9606 GN=RPL10 PE=1 SV=4	RPL10	46	9	160	9	9	24.6	5.27153e+07	2.72444e+06	712411	8.87715e+06	3.20594e+07	2.66534e+07	2.19704e+07	22677450	7.24844e+06	2.50226e+07	2.34974e+07	8.4343e+07	8.47836e+07	6.24046e+07	3.30379e+07	1.377	0.22	0.081	0.422	0.99	1.05	0.848	0.779	0.406	0.712	0.881	1.656	1.591	1.7	1.296	1.589	0.0897661	cytoplasm	K02866	RP-L10e; large subunit ribosomal protein L10e	hsa03010 Ribosome; hsa05171 Coronavirus disease - COVID-19	GO:0000027 ribosomal large subunit assembly; GO:0000122 negative regulation of transcription by RNA polymerase II; GO:0001889 liver development; GO:0006355 regulation of transcription, DNA-templated; GO:0006357 regulation of transcription by RNA polymerase II; GO:0006412 translation; GO:0006417 regulation of translation; GO:0006518 peptide metabolic process; GO:0006807 nitrogen compound metabolic…	GO:0005622 intracellular; GO:0005623 cell; GO:0005634 nucleus; GO:0005737 cytoplasm; GO:0005783 endoplasmic reticulum; GO:0005829 cytosol; GO:0005840 ribosome; GO:0012505 endomembrane system; GO:0015934 large ribosomal subunit; GO:0022625 cytosolic large ribosomal subunit; GO:0022626 cytosolic ribosome; GO:0032991 protein-containing complex; GO:0043226 organelle; GO:0043227 membrane-bounded organ…	GO:0003676 nucleic acid binding; GO:0003723 RNA binding; GO:0003735 structural constituent of ribosome; GO:0005198 structural molecule activity; GO:0005488 binding; GO:0045182 translation regulator activity; GO:0097159 organic cyclic compound binding; GO:1901363 heterocyclic compound binding;
Q5K651	Sterile alpha motif domain-containing protein 9 OS=Homo sapiens OX=9606 GN=SAMD9 PE=1 SV=1	SAMD9	4	6	13	6	6	184.2	2.27557e+06	3275476	1.60065e+06	2.06856e+06	2.11416e+06	542913	2.70169e+06	3.09926e+06	4.58924e+06	2.96125e+06	1.44612e+06	4.69015e+06	3.67466e+06	650277	256050	0.808	3.6	2.469	1.336	0.888	0.291	1.417	1.447	3.495	1.146	0.738	1.252	0.937	0.241	0.137	0.767	0.543297	nucleus	K23949			GO:0006810 transport; GO:0006906 vesicle fusion; GO:0006996 organelle organization; GO:0009987 cellular process; GO:0016043 cellular component organization; GO:0016050 vesicle organization; GO:0016192 vesicle-mediated transport; GO:0034058 endosomal vesicle fusion; GO:0048284 organelle fusion; GO:0051179 localization; GO:0051234 establishment of localization; GO:0061024 membrane organization; GO:…	GO:0005622 intracellular; GO:0005623 cell; GO:0005737 cytoplasm; GO:0005768 endosome; GO:0005769 early endosome; GO:0005829 cytosol; GO:0012505 endomembrane system; GO:0031410 cytoplasmic vesicle; GO:0031982 vesicle; GO:0043226 organelle; GO:0043227 membrane-bounded organelle; GO:0043229 intracellular organelle; GO:0043231 intracellular membrane-bounded organelle; GO:0097708 intracellular vesicle;		PF07647	SAM domain (Sterile alpha motif)
Q14108	Lysosome membrane protein 2 OS=Homo sapiens OX=9606 GN=SCARB2 PE=1 SV=2	SCARB2	11	7	39	7	7	54.3	2.67402e+07	1.27838e+07	1.14649e+07	2.00853e+07	1.50536e+07	2.85384e+07	1.4952e+07	1.07722e+07	2.15387e+07	1.52548e+07	1.41897e+07	1.36177e+07	1.38534e+07	1.52298e+07	1.81741e+07	1.354	2.002	2.52	1.848	0.901	2.178	1.118	0.717	2.338	0.841	1.031	0.518	0.504	0.804	1.382	0.571	0.0204524	endoplasmic reticulum	K12384	SCARB2; lysosome membrane protein 2	hsa04142 Lysosome	GO:0001508 action potential; GO:0002532 production of molecular mediator involved in inflammatory response; GO:0002831 regulation of response to biotic stimulus; GO:0006082 organic acid metabolic process; GO:0006605 protein targeting; GO:0006622 protein targeting to lysosome; GO:0006623 protein targeting to vacuole; GO:0006629 lipid metabolic process; GO:0006631 fatty acid metabolic process; GO:0…	GO:0000139 Golgi membrane; GO:0000323 lytic vacuole; GO:0005622 intracellular; GO:0005623 cell; GO:0005737 cytoplasm; GO:0005764 lysosome; GO:0005765 lysosomal membrane; GO:0005768 endosome; GO:0005770 late endosome; GO:0005773 vacuole; GO:0005774 vacuolar membrane; GO:0005775 vacuolar lumen; GO:0005783 endoplasmic reticulum; GO:0005789 endoplasmic reticulum membrane; GO:0005794 Golgi apparatus; …	GO:0004888 transmembrane signaling receptor activity; GO:0005044 scavenger receptor activity; GO:0005488 binding; GO:0005515 protein binding; GO:0019899 enzyme binding; GO:0038023 signaling receptor activity; GO:0038024 cargo receptor activity; GO:0060089 molecular transducer activity;
Q96FV2	Secernin-2 OS=Homo sapiens OX=9606 GN=SCRN2 PE=1 SV=3	SCRN2	19	5	27	5	5	46.6	2.36332e+06			1.04223e+06	2.31401e+06	1.95103e+06	2.70053e+06	1.81098e+06	1.89516e+06	2.50922e+06	1.70634e+06	2.3579e+06	3030984	1.38903e+06	1.67387e+06	0.978			0.784	1.132	1.217	1.65	0.985	1.681	1.131	1.014	0.733	0.901	0.599	1.04	1.052	0.937988	extracellular	K14358			GO:0006810 transport; GO:0006887 exocytosis; GO:0009987 cellular process; GO:0016192 vesicle-mediated transport; GO:0032940 secretion by cell; GO:0046903 secretion; GO:0051179 localization; GO:0051234 establishment of localization;
Q9UIV8	Serpin B13 OS=Homo sapiens OX=9606 GN=SERPINB13 PE=1 SV=2	SERPINB13	25	9	31	9	9	44.2	683313			819969	1.26655e+06	720424	2.28803e+06	6.35835e+06	554097	3.9583e+06	874636	6.38559e+06	6.50848e+06	4.42136e+06	4.60975e+06	0.192			0.418	0.42	0.305	0.948	2.344	0.333	1.209	0.352	1.346	1.311	1.294	1.942	3.688	0.00831697	cytoplasm	K13963	SERPINB; serpin B	hsa05146 Amoebiasis	GO:0009314 response to radiation; GO:0009411 response to UV; GO:0009416 response to light stimulus; GO:0009628 response to abiotic stimulus; GO:0009892 negative regulation of metabolic process; GO:0010466 negative regulation of peptidase activity; GO:0010605 negative regulation of macromolecule metabolic process; GO:0010941 regulation of cell death; GO:0010951 negative regulation of endopeptidase…	GO:0000323 lytic vacuole; GO:0005576 extracellular region; GO:0005615 extracellular space; GO:0005622 intracellular; GO:0005623 cell; GO:0005634 nucleus; GO:0005654 nucleoplasm; GO:0005737 cytoplasm; GO:0005764 lysosome; GO:0005773 vacuole; GO:0005775 vacuolar lumen; GO:0005829 cytosol; GO:0016604 nuclear body; GO:0016607 nuclear speck; GO:0031974 membrane-enclosed lumen; GO:0031981 nuclear lumen…	GO:0002020 protease binding; GO:0004857 enzyme inhibitor activity; GO:0004866 endopeptidase inhibitor activity; GO:0004867 serine-type endopeptidase inhibitor activity; GO:0004869 cysteine-type endopeptidase inhibitor activity; GO:0005488 binding; GO:0005515 protein binding; GO:0019899 enzyme binding; GO:0030234 enzyme regulator activity; GO:0030414 peptidase inhibitor activity; GO:0061134 peptid…	PF00079	Serpin (serine protease inhibitor)
O00161	Synaptosomal-associated protein 23 OS=Homo sapiens OX=9606 GN=SNAP23 PE=1 SV=1	SNAP23	43	7	63	7	7	23.3	2.85521e+07	5.66406e+06	6.49738e+06	1.00429e+07	1.43517e+07	1.32018e+07	1.11799e+07	1.47474e+07	1.08535e+07	2.04238e+07	1.42776e+07	1.23971e+07	2.34548e+07	1.56504e+07	1.37879e+07	1.695	1.04	1.675	1.084	1.007	1.182	0.98	1.151	1.382	1.321	1.217	0.553	1	0.969	1.229	0.851	0.246735	cytoplasm	K08508	SNAP23; synaptosomal-associated protein 23	hsa04130 SNARE interactions in vesicular transport; hsa04611 Platelet activation	GO:0001505 regulation of neurotransmitter levels; GO:0001775 cell activation; GO:0001821 histamine secretion; GO:0002252 immune effector process; GO:0002263 cell activation involved in immune response; GO:0002274 myeloid leukocyte activation; GO:0002275 myeloid cell activation involved in immune response; GO:0002279 mast cell activation involved in immune response; GO:0002283 neutrophil activatio…	GO:0000323 lytic vacuole; GO:0005622 intracellular; GO:0005623 cell; GO:0005634 nucleus; GO:0005654 nucleoplasm; GO:0005737 cytoplasm; GO:0005764 lysosome; GO:0005766 primary lysosome; GO:0005773 vacuole; GO:0005886 plasma membrane; GO:0005911 cell-cell junction; GO:0005912 adherens junction; GO:0012505 endomembrane system; GO:0012506 vesicle membrane; GO:0016020 membrane; GO:0030054 cell junctio…	GO:0000149 SNARE binding; GO:0005484 SNAP receptor activity; GO:0005488 binding; GO:0005515 protein binding; GO:0019905 syntaxin binding;
Q9Y2Z0	Protein SGT1 homolog OS=Homo sapiens OX=9606 GN=SUGT1 PE=1 SV=3	SUGT1	20	6	28	6	6	41	3.48696e+06	924026	1.00411e+06	2.44867e+06	3.22094e+06	3.22139e+06	3.62454e+06	2.4135e+06	3.03939e+06	4.51319e+06	4.25766e+06	6.34619e+06	3.29878e+06	4.88201e+06	5.12882e+06	0.859	0.705	1.074	1.097	0.938	1.197	1.319	0.782	1.606	1.212	1.507	1.175	0.584	1.255	1.899	1.288	0.211464	cytoplasm	K12795	SUGT1; suppressor of G2 allele of SKP1	hsa04621 NOD-like receptor signaling pathway	GO:0000278 mitotic cell cycle; GO:0007049 cell cycle; GO:0009987 cellular process; GO:0031647 regulation of protein stability; GO:0035821 modulation of process of other organism; GO:0043946 positive regulation of catalytic activity in other organism involved in symbiotic interaction; GO:0043947 positive regulation by host of symbiont catalytic activity; GO:0044092 negative regulation of molecular…	GO:0000151 ubiquitin ligase complex; GO:0000775 chromosome, centromeric region; GO:0000776 kinetochore; GO:0005622 intracellular; GO:0005623 cell; GO:0005694 chromosome; GO:0005737 cytoplasm; GO:0005829 cytosol; GO:0032991 protein-containing complex; GO:0043226 organelle; GO:0043228 non-membrane-bounded organelle; GO:0043229 intracellular organelle; GO:0043232 intracellular non-membrane-bounded o…		PF04969; PF05002	CS domain; SGS domain
Q15036	Sorting nexin-17 OS=Homo sapiens OX=9606 GN=SNX17 PE=1 SV=1	SNX17	18	6	29	6	6	52.9	7.201e+06		943915	1.49568e+07	3.5819e+06	4.94422e+06	1.94348e+06	1.8842e+06	1.56278e+06	2.48987e+06	4.4411e+06	4.12081e+06	5.04733e+06	3.75615e+06	9.29741e+06	1.297		0.738	4.896	0.763	1.343	0.517	0.446	0.603	0.488	1.148	0.558	0.653	0.706	2.515	0.469	0.0899602	nucleus	K17929			GO:0001568 blood vessel development; GO:0001944 vasculature development; GO:0003205 cardiac chamber development; GO:0003279 cardiac septum development; GO:0006066 alcohol metabolic process; GO:0006629 lipid metabolic process; GO:0006706 steroid catabolic process; GO:0006707 cholesterol catabolic process; GO:0006810 transport; GO:0006886 intracellular protein transport; GO:0006897 endocytosis; GO:…	GO:0005622 intracellular; GO:0005623 cell; GO:0005737 cytoplasm; GO:0005768 endosome; GO:0005769 early endosome; GO:0005794 Golgi apparatus; GO:0005829 cytosol; GO:0010008 endosome membrane; GO:0012505 endomembrane system; GO:0012506 vesicle membrane; GO:0016020 membrane; GO:0030659 cytoplasmic vesicle membrane; GO:0031090 organelle membrane; GO:0031410 cytoplasmic vesicle; GO:0031982 vesicle; GO…	GO:0005102 signaling receptor binding; GO:0005488 binding; GO:0005515 protein binding; GO:0005543 phospholipid binding; GO:0008022 protein C-terminus binding; GO:0008289 lipid binding; GO:0035091 phosphatidylinositol binding; GO:0043167 ion binding; GO:0043168 anion binding; GO:0050750 low-density lipoprotein particle receptor binding; GO:0070325 lipoprotein particle receptor binding;	PF00787	PX domain
Q9H299	SH3 domain-binding glutamic acid-rich-like protein 3 OS=Homo sapiens OX=9606 GN=SH3BGRL3 PE=1 SV=1	SH3BGRL3	40	4	131	4	4	10.4	7.27619e+07	4.81218e+06	4695071	1.42131e+07	2.21819e+07	1.41737e+07	7.91537e+06	2.77404e+07	1.37155e+07	1.84437e+07	5.66367e+07	5.05668e+07	1.08424e+08	6.25307e+07	5.10504e+07	1.754	0.359	0.491	0.623	0.632	0.515	0.282	0.878	0.709	0.484	1.96	0.916	1.876	1.572	1.848	1.604	0.207181	mitochondria	K23740				GO:0005622 intracellular; GO:0005623 cell; GO:0005737 cytoplasm;
Q99611	Selenide, water dikinase 2 OS=Homo sapiens OX=9606 GN=SEPHS2 PE=1 SV=3	SEPHS2	11	4	9	4	4	47.3	1.71176e+06	1.27562e+06	253876	1.16301e+06	900414	1.1737e+06	739052	1.67344e+06	570173	1.59124e+06	774062	1.61654e+06	1.9229e+06	1.50784e+06	965916	1.225	2.825	0.789	1.513	0.762	1.267	0.781	1.574	0.875	1.241	0.795	0.869	0.988	1.126	1.038	0.739	0.244893	cytoplasm	K01008	selD; selenide, water dikinase [EC:2.7.9.3]	hsa00450 Selenocompound metabolism; hsa01100 Metabolic pathways	GO:0006082 organic acid metabolic process; GO:0006520 cellular amino acid metabolic process; GO:0006793 phosphorus metabolic process; GO:0006796 phosphate-containing compound metabolic process; GO:0006807 nitrogen compound metabolic process; GO:0008152 metabolic process; GO:0008652 cellular amino acid biosynthetic process; GO:0009058 biosynthetic process; GO:0009069 serine family amino acid metab…	GO:0005622 intracellular; GO:0005623 cell; GO:0005737 cytoplasm; GO:0005829 cytosol;	GO:0003824 catalytic activity; GO:0004756 selenide, water dikinase activity; GO:0016301 kinase activity; GO:0016740 transferase activity; GO:0016772 transferase activity, transferring phosphorus-containing groups; GO:0016781 phosphotransferase activity, paired acceptors;	PF00586; PF02769	AIR synthase related protein, N-terminal domain; AIR synthase related protein, C-terminal domain
Q96RM1	Small proline-rich protein 2F OS=Homo sapiens OX=9606 GN=SPRR2F PE=3 SV=1	SPRR2F	74	5	55	3	3	7.8	752949	2.83474e+06	2372335	910935	5.07383e+06	2.296e+06	1.27635e+07	3.13507e+07	1.14749e+07	2.11668e+07	4.37713e+06	2.19603e+07	2.00222e+07	1.7664e+07	2.97899e+07	0.052	0.606	0.712	0.114	0.414	0.239	1.302	2.847	1.7	1.593	0.434	1.14	0.993	1.273	3.091	4.484	0.00114398	extracellular
O94875	Sorbin and SH3 domain-containing protein 2 OS=Homo sapiens OX=9606 GN=SORBS2 PE=1 SV=3	SORBS2	10	8	80	8	8	124	2.24834e+06	1.00993e+07	3.296e+06	5.98726e+06	6.04839e+06	7.45128e+06	1.27206e+07	6.1841e+06	1.45916e+07	10427369	4.07232e+06	2.19618e+06	7431486	2.8967e+06	3.38519e+06	0.29	4.029	1.845	1.403	0.922	1.449	2.422	1.048	4.034	1.464	0.754	0.213	0.688	0.39	0.656	0.783	0.495614	nucleus	K23708			GO:0003008 system process; GO:0003012 muscle system process; GO:0003298 physiological muscle hypertrophy; GO:0003300 cardiac muscle hypertrophy; GO:0003301 physiological cardiac muscle hypertrophy; GO:0006996 organelle organization; GO:0007010 cytoskeleton organization; GO:0007275 multicellular organism development; GO:0007507 heart development; GO:0009888 tissue development; GO:0009987 cellular …	GO:0005622 intracellular; GO:0005623 cell; GO:0005634 nucleus; GO:0005654 nucleoplasm; GO:0005737 cytoplasm; GO:0005856 cytoskeleton; GO:0015629 actin cytoskeleton; GO:0030016 myofibril; GO:0030017 sarcomere; GO:0030018 Z disc; GO:0031674 I band; GO:0031974 membrane-enclosed lumen; GO:0031981 nuclear lumen; GO:0043226 organelle; GO:0043227 membrane-bounded organelle; GO:0043228 non-membrane-bound…	GO:0005198 structural molecule activity; GO:0005200 structural constituent of cytoskeleton; GO:0005488 binding; GO:0005515 protein binding; GO:0008092 cytoskeletal protein binding; GO:0008093 cytoskeletal anchor activity; GO:0008307 structural constituent of muscle; GO:0030674 protein-macromolecule adaptor activity; GO:0060090 molecular adaptor activity;	PF00018	SH3 domain
Q8IYB3	Serine/arginine repetitive matrix protein 1 OS=Homo sapiens OX=9606 GN=SRRM1 PE=1 SV=2	SRRM1	7	4	32	4	4	102.3	2.02688e+06		147771		2.90398e+06	446743	606600	2.94524e+06	1.72646e+06	4.32384e+06	2.61111e+06	5.61557e+06	6.20927e+06	3.73803e+06	1.9559e+06	0.636		0.201		1.077	0.211	0.281	1.215	1.162	1.478	1.177	1.324	1.4	1.224	0.922	2.13	0.0291259	nucleus	K13171	SRRM1; serine/arginine repetitive matrix protein 1	hsa03013 Nucleocytoplasmic transport; hsa03015 mRNA surveillance pathway	GO:0000375 RNA splicing, via transesterification reactions; GO:0000377 RNA splicing, via transesterification reactions with bulged adenosine as nucleophile; GO:0000398 mRNA splicing, via spliceosome; GO:0006139 nucleobase-containing compound metabolic process; GO:0006396 RNA processing; GO:0006397 mRNA processing; GO:0006403 RNA localization; GO:0006405 RNA export from nucleus; GO:0006406 mRNA ex…	GO:0005622 intracellular; GO:0005623 cell; GO:0005634 nucleus; GO:0005654 nucleoplasm; GO:0005681 spliceosomal complex; GO:0005737 cytoplasm; GO:0005829 cytosol; GO:0016363 nuclear matrix; GO:0016604 nuclear body; GO:0016607 nuclear speck; GO:0031974 membrane-enclosed lumen; GO:0031981 nuclear lumen; GO:0032991 protein-containing complex; GO:0034399 nuclear periphery; GO:0043226 organelle; GO:004…
Q9NYA1	Sphingosine kinase 1 OS=Homo sapiens OX=9606 GN=SPHK1 PE=1 SV=1	SPHK1	2	1	1	1	1	42.5	609398									203474			218645	111429	103095																		mitochondria	K04718	SPHK; sphingosine kinase [EC:2.7.1.91]	hsa04666 Fc gamma R-mediated phagocytosis; hsa00600 Sphingolipid metabolism; hsa04072 Phospholipase D signaling pathway; hsa05152 Tuberculosis; hsa04020 Calcium signaling pathway; hsa04371 Apelin signaling pathway; hsa04370 VEGF signaling pathway; hsa04071 Sphingolipid signaling pathway; hsa01100 Metabolic pathways	GO:0000003 reproduction; GO:0000302 response to reactive oxygen species; GO:0001505 regulation of neurotransmitter levels; GO:0001516 prostaglandin biosynthetic process; GO:0001558 regulation of cell growth; GO:0001568 blood vessel development; GO:0001676 long-chain fatty acid metabolic process; GO:0001817 regulation of cytokine production; GO:0001932 regulation of protein phosphorylation; GO:000…	GO:0005622 intracellular; GO:0005623 cell; GO:0005634 nucleus; GO:0005737 cytoplasm; GO:0005829 cytosol; GO:0005886 plasma membrane; GO:0008021 synaptic vesicle; GO:0012505 endomembrane system; GO:0016020 membrane; GO:0030133 transport vesicle; GO:0030424 axon; GO:0031410 cytoplasmic vesicle; GO:0031982 vesicle; GO:0042995 cell projection; GO:0043005 neuron projection; GO:0043226 organelle; GO:00…	GO:0000166 nucleotide binding; GO:0000287 magnesium ion binding; GO:0001727 lipid kinase activity; GO:0003676 nucleic acid binding; GO:0003677 DNA binding; GO:0003824 catalytic activity; GO:0004888 transmembrane signaling receptor activity; GO:0004930 G protein-coupled receptor activity; GO:0005488 binding; GO:0005515 protein binding; GO:0005516 calmodulin binding; GO:0005524 ATP binding; GO:0008…
Q9UMZ2	Synergin gamma OS=Homo sapiens OX=9606 GN=SYNRG PE=1 SV=2	SYNRG	1	1	3	1	1	140.6	338385	184949	259665	561020	265043	317284		163604		309271	475671	468678	425402	165375																			nucleus	K25219			GO:0006810 transport; GO:0006886 intracellular protein transport; GO:0008104 protein localization; GO:0015031 protein transport; GO:0015833 peptide transport; GO:0033036 macromolecule localization; GO:0034613 cellular protein localization; GO:0042886 amide transport; GO:0045184 establishment of protein localization; GO:0046907 intracellular transport; GO:0051179 localization; GO:0051234 establish…	GO:0005622 intracellular; GO:0005623 cell; GO:0005737 cytoplasm; GO:0005794 Golgi apparatus; GO:0005798 Golgi-associated vesicle; GO:0012505 endomembrane system; GO:0012506 vesicle membrane; GO:0012510 trans-Golgi network transport vesicle membrane; GO:0016020 membrane; GO:0030117 membrane coat; GO:0030118 clathrin coat; GO:0030119 AP-type membrane coat adaptor complex; GO:0030120 vesicle coat; G…
P25490	Transcriptional repressor protein YY1 OS=Homo sapiens OX=9606 GN=YY1 PE=1 SV=2	YY1	10	3	8	3	3	44.7	1.14379e+06		768828		1.22327e+06	487730		276709				1.48607e+06	2.39164e+06	857372	848433	0.924		2.697		1.168	0.594		0.294				0.902	1.388	0.722	1.029	0.644	0.36465	nucleus	K09201			GO:0000003 reproduction; GO:0000122 negative regulation of transcription by RNA polymerase II; GO:0000724 double-strand break repair via homologous recombination; GO:0000725 recombinational repair; GO:0001654 eye development; GO:0001817 regulation of cytokine production; GO:0001818 negative regulation of cytokine production; GO:0003002 regionalization; GO:0006139 nucleobase-containing compound me…	GO:0000228 nuclear chromosome; GO:0000785 chromatin; GO:0000790 nuclear chromatin; GO:0005622 intracellular; GO:0005623 cell; GO:0005634 nucleus; GO:0005654 nucleoplasm; GO:0005667 transcription regulator complex; GO:0005694 chromosome; GO:0005737 cytoplasm; GO:0016363 nuclear matrix; GO:0031011 Ino80 complex; GO:0031519 PcG protein complex; GO:0031974 membrane-enclosed lumen; GO:0031981 nuclear …	GO:0000217 DNA secondary structure binding; GO:0000400 four-way junction DNA binding; GO:0000976 transcription regulatory region sequence-specific DNA binding; GO:0000977 RNA polymerase II transcription regulatory region sequence-specific DNA binding; GO:0000978 RNA polymerase II cis-regulatory region sequence-specific DNA binding; GO:0000981 DNA-binding transcription factor activity, RNA polymer…	PF00096	Zinc finger, C2H2 type
P49459	Ubiquitin-conjugating enzyme E2 A OS=Homo sapiens OX=9606 GN=UBE2A PE=1 SV=2	UBE2A	11	1	4	1	1	17.3						121735	345692	823432	357025	519412			266008	420758	427372																		nucleus	K10573	UBE2A; ubiquitin-conjugating enzyme E2 A [EC:2.3.2.23]	hsa04120 Ubiquitin mediated proteolysis	GO:0000003 reproduction; GO:0000209 protein polyubiquitination; GO:0001701 in utero embryonic development; GO:0006139 nucleobase-containing compound metabolic process; GO:0006259 DNA metabolic process; GO:0006281 DNA repair; GO:0006301 postreplication repair; GO:0006325 chromatin organization; GO:0006464 cellular protein modification process; GO:0006508 proteolysis; GO:0006511 ubiquitin-dependent…	GO:0000151 ubiquitin ligase complex; GO:0000228 nuclear chromosome; GO:0000785 chromatin; GO:0000790 nuclear chromatin; GO:0000792 heterochromatin; GO:0000803 sex chromosome; GO:0001741 XY body; GO:0005622 intracellular; GO:0005623 cell; GO:0005634 nucleus; GO:0005654 nucleoplasm; GO:0005694 chromosome; GO:0005737 cytoplasm; GO:0005829 cytosol; GO:0031371 ubiquitin conjugating enzyme complex; GO:…	GO:0003824 catalytic activity; GO:0004842 ubiquitin-protein transferase activity; GO:0005488 binding; GO:0005515 protein binding; GO:0016740 transferase activity; GO:0019787 ubiquitin-like protein transferase activity; GO:0019899 enzyme binding; GO:0031625 ubiquitin protein ligase binding; GO:0032182 ubiquitin-like protein binding; GO:0043130 ubiquitin binding; GO:0044389 ubiquitin-like protein l…	PF00179	Ubiquitin-conjugating enzyme
P63146	Ubiquitin-conjugating enzyme E2 B OS=Homo sapiens OX=9606 GN=UBE2B PE=1 SV=1	UBE2B	11	1	7	1	1	17.3	145659					121198	152453	283509	209267	215060	1.46215e+06	301135	810343	394114	567709																		nucleus	K10574	UBE2B; ubiquitin-conjugating enzyme E2 B [EC:2.3.2.23]	hsa04120 Ubiquitin mediated proteolysis	GO:0000003 reproduction; GO:0000018 regulation of DNA recombination; GO:0000209 protein polyubiquitination; GO:0000226 microtubule cytoskeleton organization; GO:0000280 nuclear division; GO:0001578 microtubule bundle formation; GO:0001666 response to hypoxia; GO:0001701 in utero embryonic development; GO:0001932 regulation of protein phosphorylation; GO:0001933 negative regulation of protein phos…	GO:0000151 ubiquitin ligase complex; GO:0000228 nuclear chromosome; GO:0000785 chromatin; GO:0000790 nuclear chromatin; GO:0000792 heterochromatin; GO:0000803 sex chromosome; GO:0001741 XY body; GO:0005622 intracellular; GO:0005623 cell; GO:0005634 nucleus; GO:0005654 nucleoplasm; GO:0005657 replication fork; GO:0005694 chromosome; GO:0005737 cytoplasm; GO:0031371 ubiquitin conjugating enzyme com…	GO:0003824 catalytic activity; GO:0004842 ubiquitin-protein transferase activity; GO:0005488 binding; GO:0005515 protein binding; GO:0016740 transferase activity; GO:0019787 ubiquitin-like protein transferase activity; GO:0019899 enzyme binding; GO:0031625 ubiquitin protein ligase binding; GO:0044389 ubiquitin-like protein ligase binding; GO:0061630 ubiquitin protein ligase activity; GO:0061631 u…	PF00179	Ubiquitin-conjugating enzyme
Q969M7	NEDD8-conjugating enzyme UBE2F OS=Homo sapiens OX=9606 GN=UBE2F PE=1 SV=1	UBE2F	10	1	1	1	1	21.1		293813		425888				302553	327592	273097	213736	200081		141705	144642																		cytoplasm	K10687	UBE2F; ubiquitin-conjugating enzyme E2 F [EC:2.3.2.34]	hsa04120 Ubiquitin mediated proteolysis	GO:0006464 cellular protein modification process; GO:0006807 nitrogen compound metabolic process; GO:0008152 metabolic process; GO:0009987 cellular process; GO:0016567 protein ubiquitination; GO:0019538 protein metabolic process; GO:0032446 protein modification by small protein conjugation; GO:0036211 protein modification process; GO:0043170 macromolecule metabolic process; GO:0043412 macromolecu…	GO:0005622 intracellular; GO:0005623 cell; GO:0005737 cytoplasm;	GO:0003824 catalytic activity; GO:0004842 ubiquitin-protein transferase activity; GO:0005488 binding; GO:0005515 protein binding; GO:0016740 transferase activity; GO:0019787 ubiquitin-like protein transferase activity; GO:0019788 NEDD8 transferase activity; GO:0019899 enzyme binding; GO:0031625 ubiquitin protein ligase binding; GO:0044389 ubiquitin-like protein ligase binding; GO:0061630 ubiquiti…	PF00179	Ubiquitin-conjugating enzyme
P62256	Ubiquitin-conjugating enzyme E2 H OS=Homo sapiens OX=9606 GN=UBE2H PE=1 SV=1	UBE2H	5	1	4	1	1	20.6	194405				571112	434205	250147	581710		533296	202057	676678	1.2947e+06	1.05132e+06	888379																		cytoplasm	K10576	UBE2H; ubiquitin-conjugating enzyme E2 H [EC:2.3.2.23]	hsa04120 Ubiquitin mediated proteolysis	GO:0000209 protein polyubiquitination; GO:0006464 cellular protein modification process; GO:0006508 proteolysis; GO:0006511 ubiquitin-dependent protein catabolic process; GO:0006807 nitrogen compound metabolic process; GO:0008152 metabolic process; GO:0009056 catabolic process; GO:0009057 macromolecule catabolic process; GO:0009987 cellular process; GO:0010498 proteasomal protein catabolic proces…	GO:0005622 intracellular; GO:0005623 cell; GO:0005737 cytoplasm; GO:0005829 cytosol;	GO:0003824 catalytic activity; GO:0004842 ubiquitin-protein transferase activity; GO:0005488 binding; GO:0005515 protein binding; GO:0016740 transferase activity; GO:0019787 ubiquitin-like protein transferase activity; GO:0019899 enzyme binding; GO:0031625 ubiquitin protein ligase binding; GO:0044389 ubiquitin-like protein ligase binding; GO:0061630 ubiquitin protein ligase activity; GO:0061631 u…	PF00179	Ubiquitin-conjugating enzyme
A6NIH7	Protein unc-119 homolog B OS=Homo sapiens OX=9606 GN=UNC119B PE=1 SV=1	UNC119B	12	2	10	2	2	28.1	884232	228477			614317	586670	643996	649206	609147	1.05558e+06	813429	905541	984517	666388	457755	1.076	0.86			0.883	1.076	1.156	1.038	1.588	1.398	1.42	0.828	0.86	0.845	0.836	1.138	0.471639	cytoplasm	K23539			GO:0006810 transport; GO:0006996 organelle organization; GO:0007275 multicellular organism development; GO:0007399 nervous system development; GO:0008104 protein localization; GO:0009987 cellular process; GO:0015031 protein transport; GO:0015833 peptide transport; GO:0016043 cellular component organization; GO:0022008 neurogenesis; GO:0022607 cellular component assembly; GO:0030030 cell projectio…	GO:0005622 intracellular; GO:0005623 cell; GO:0005737 cytoplasm; GO:0005829 cytosol; GO:0005929 cilium; GO:0035869 ciliary transition zone; GO:0042995 cell projection; GO:0043226 organelle; GO:0120025 plasma membrane bounded cell projection;	GO:0005488 binding; GO:0008289 lipid binding;
P61086	Ubiquitin-conjugating enzyme E2 K OS=Homo sapiens OX=9606 GN=UBE2K PE=1 SV=3	UBE2K	42	7	68	7	7	22.4	7.56446e+06	3.19493e+06	4.20773e+06	6.81162e+06	1.26898e+07	8.32396e+06	8.17159e+06	1.08965e+07	6.63013e+06	1.50626e+07	7.95487e+06	1.96377e+07	1.99229e+07	1.88151e+07	7.75453e+06	0.613	0.801	1.48	1.003	1.215	1.017	0.977	1.16	1.151	1.329	0.925	1.195	1.159	1.589	0.943	1.134	0.24465	cytoplasm	K04649	HIP2; ubiquitin-conjugating enzyme (huntingtin interacting protein 2) [EC:2.3.2.23]	hsa04120 Ubiquitin mediated proteolysis	GO:0000209 protein polyubiquitination; GO:0001932 regulation of protein phosphorylation; GO:0001934 positive regulation of protein phosphorylation; GO:0001959 regulation of cytokine-mediated signaling pathway; GO:0001961 positive regulation of cytokine-mediated signaling pathway; GO:0002682 regulation of immune system process; GO:0002684 positive regulation of immune system process; GO:0006464 ce…	GO:0005622 intracellular; GO:0005623 cell; GO:0005634 nucleus; GO:0005737 cytoplasm; GO:0005829 cytosol; GO:0030175 filopodium; GO:0032433 filopodium tip; GO:0042995 cell projection; GO:0043226 organelle; GO:0043227 membrane-bounded organelle; GO:0043229 intracellular organelle; GO:0043231 intracellular membrane-bounded organelle; GO:0098858 actin-based cell projection; GO:0120025 plasma membrane…	GO:0003824 catalytic activity; GO:0004842 ubiquitin-protein transferase activity; GO:0005488 binding; GO:0005515 protein binding; GO:0016740 transferase activity; GO:0019787 ubiquitin-like protein transferase activity; GO:0019899 enzyme binding; GO:0031625 ubiquitin protein ligase binding; GO:0034450 ubiquitin-ubiquitin ligase activity; GO:0044389 ubiquitin-like protein ligase binding; GO:0061630…	PF00179; PF00627	Ubiquitin-conjugating enzyme; UBA/TS-N domain
P61088	Ubiquitin-conjugating enzyme E2 N OS=Homo sapiens OX=9606 GN=UBE2N PE=1 SV=1	UBE2N	39	6	98	6	6	17.1	3.91088e+07	9.57088e+06	6.80963e+06	1.53864e+07	2.80845e+07	2.08958e+07	2.4244e+07	4.4142e+07	1.66214e+07	4.99902e+07	29840043	5.67885e+07	7.1991e+07	3.37065e+07	2.31731e+07	1.062	0.804	0.803	0.759	0.901	0.855	0.972	1.575	0.967	1.478	1.163	1.158	1.404	0.954	0.945	1.365	0.00682633	mitochondria	K10580	UBE2N; ubiquitin-conjugating enzyme E2 N [EC:2.3.2.23]	hsa04120 Ubiquitin mediated proteolysis; hsa05131 Shigellosis	GO:0000165 MAPK cascade; GO:0000187 activation of MAPK activity; GO:0000209 protein polyubiquitination; GO:0000724 double-strand break repair via homologous recombination; GO:0000725 recombinational repair; GO:0000726 non-recombinational repair; GO:0000729 DNA double-strand break processing; GO:0001932 regulation of protein phosphorylation; GO:0001934 positive regulation of protein phosphorylatio…	GO:0000151 ubiquitin ligase complex; GO:0001650 fibrillar center; GO:0005622 intracellular; GO:0005623 cell; GO:0005634 nucleus; GO:0005654 nucleoplasm; GO:0005730 nucleolus; GO:0005737 cytoplasm; GO:0005829 cytosol; GO:0031371 ubiquitin conjugating enzyme complex; GO:0031372 UBC13-MMS2 complex; GO:0031974 membrane-enclosed lumen; GO:0031981 nuclear lumen; GO:0032991 protein-containing complex; G…	GO:0003824 catalytic activity; GO:0004842 ubiquitin-protein transferase activity; GO:0005488 binding; GO:0005515 protein binding; GO:0016740 transferase activity; GO:0019787 ubiquitin-like protein transferase activity; GO:0019899 enzyme binding; GO:0031625 ubiquitin protein ligase binding; GO:0032182 ubiquitin-like protein binding; GO:0043130 ubiquitin binding; GO:0044389 ubiquitin-like protein l…	PF00179	Ubiquitin-conjugating enzyme
Q9C0C9	(E3-independent) E2 ubiquitin-conjugating enzyme OS=Homo sapiens OX=9606 GN=UBE2O PE=1 SV=3	UBE2O	2	2	9	2	2	141.2	314354	229582	146757		681763	487684	372761	356087		584788	341708	1048388	955494	596687	378476	0.536	1.21	1.086		1.373	1.253	0.938	0.797		1.085	0.836	1.342	1.169	1.06	0.969	0.939	0.860821	nucleus	K10581	UBE2O; ubiquitin-conjugating enzyme E2 O [EC:2.3.2.24]	hsa04120 Ubiquitin mediated proteolysis	GO:0000209 protein polyubiquitination; GO:0006355 regulation of transcription, DNA-templated; GO:0006357 regulation of transcription by RNA polymerase II; GO:0006464 cellular protein modification process; GO:0006513 protein monoubiquitination; GO:0006807 nitrogen compound metabolic process; GO:0006810 transport; GO:0008152 metabolic process; GO:0009889 regulation of biosynthetic process; GO:00099…	GO:0005622 intracellular; GO:0005623 cell; GO:0005634 nucleus; GO:0005654 nucleoplasm; GO:0005737 cytoplasm; GO:0016604 nuclear body; GO:0031974 membrane-enclosed lumen; GO:0031981 nuclear lumen; GO:0043226 organelle; GO:0043227 membrane-bounded organelle; GO:0043229 intracellular organelle; GO:0043231 intracellular membrane-bounded organelle; GO:0043233 organelle lumen; GO:0070013 intracellular …	GO:0003824 catalytic activity; GO:0004842 ubiquitin-protein transferase activity; GO:0005488 binding; GO:0005515 protein binding; GO:0016740 transferase activity; GO:0019787 ubiquitin-like protein transferase activity; GO:0019899 enzyme binding; GO:0031625 ubiquitin protein ligase binding; GO:0044389 ubiquitin-like protein ligase binding; GO:0061630 ubiquitin protein ligase activity; GO:0061631 u…	PF00179	Ubiquitin-conjugating enzyme
[truncated: 5,061 more rows]
[truncated: 3 more columns]
