# Supplementary material for: Generating detailed intercellular communication patterns in psoriasis at the single-cell level using social networking, pattern recognition, and manifold learning methods to optimize treatment strategies
Source: Aging (Albany NY). 2024 Jan 29;16(3):2194–231. doi: 10.18632/aging.205478 (PMC10911347; doi:10.18632/aging.205478)
Supplement: Supplementary Table 7 [file aging-16-205478-s008.xlsx]

## Sheet: Supplementary Table 7
Supplementary Table 7. Differential proteins in pathological sections of psoriasis and normal skin.
Protein accession	Gene name	Psoriasis/Normal skin Ratio	Psoriasis/Normal P value	Regulated Type	Quality classification
Q6UXN9	WDR82	2.225	0.011188	Up	Q4
Q8TD43	TRPM4	1.969	0.0414691	Up	Q3
Q96S55	WRNIP1	1.717	0.0299744	Up	Q3
Q8NI36	WDR36	1.95	0.0292673	Up	Q3
P09493	TPM1	0.592	0.00420581	Down	Q2
Q9UMX0	UBQLN1	2.459	0.000191972	Up	Q4
O95758	PTBP3	1.817	0.0470078	Up	Q3
P62829	RPL23	1.805	0.0137299	Up	Q3
Q96E11	MRRF	1.653	0.0183676	Up	Q3
Q8NBJ7	SUMF2	0.53	0.0182137	Down	Q2
Q9BX66	SORBS1	0.442	0.0110006	Down	Q1
Q9Y285	FARSA	1.525	0.0048333	Up	Q3
Q9Y3D9	MRPS23	1.707	0.0178756	Up	Q3
Q9Y3A5	SBDS	1.903	0.000110971	Up	Q3
Q9BW04	SARG	0.348	0.0437618	Down	Q1
Q6P3W7	SCYL2	2.454	0.0277012	Up	Q4
Q92922	SMARCC1	1.909	0.0319962	Up	Q3
Q12931	TRAP1	1.508	0.0237558	Up	Q3
Q53GG5	PDLIM3	0.162	0.000820472	Down	Q1
Q9HBH5	RDH14	0.485	0.0420243	Down	Q1
P00747	PLG	0.437	0.0242963	Down	Q1
Q99541	PLIN2	0.353	0.00811922	Down	Q1
O14495	PLPP3	0.088	0.005631	Down	Q1
P01833	PIGR	0.108	0.039402	Down	Q1
P55036	PSMD4	2.842	0.00843607	Up	Q4
P40818	USP8	1.658	0.0191047	Up	Q3
Q08257	CRYZ	0.638	0.00931399	Down	Q2
P35542	SAA4	0.425	0.00636165	Down	Q1
Q7L523	RRAGA	1.755	0.0368871	Up	Q3
Q9Y5B9	SUPT16H	18.217	0.0334217	Up	Q4
Q9P289	STK26	0.555	0.0170055	Down	Q2
P42229	STAT5A	0.59	0.0231017	Down	Q2
Q9NP77	SSU72	0.325	0.0396449	Down	Q1
Q9BVA1	TUBB2B	1.651	0.00103631	Up	Q3
Q14258	TRIM25	1.611	0.00543603	Up	Q3
Q9UBU9	NXF1	2.196	0.00218462	Up	Q4
Q9UMY4	SNX12	1.623	0.018431	Up	Q3
P53007	SLC25A1	0.44	0.0319692	Down	Q1
P30050	RPL12	1.964	0.00568608	Up	Q3
P62906	RPL10A	1.728	0.0390129	Up	Q3
Q14108	SCARB2	0.571	0.0204524	Down	Q2
Q9UIV8	SERPINB13	3.688	0.00831697	Up	Q4
Q96RM1	SPRR2F	4.484	0.00114398	Up	Q4
Q8IYB3	SRRM1	2.13	0.0291259	Up	Q4
P61020	RAB5B	1.545	0.0320746	Up	Q3
O76021	RSL1D1	1.873	0.0170679	Up	Q3
P10301	RRAS	0.48	0.0059642	Down	Q1
Q96LR5	UBE2E2	1.885	0.0137131	Up	Q3
O00534	VWA5A	0.639	0.034631	Down	Q2
P42768	WAS	0.325	0.00480911	Down	Q1
Q8IWA0	WDR75	1.949	0.0115043	Up	Q3
Q99836	MYD88	1.509	0.0433467	Up	Q3
Q9Y6K5	OAS3	2.605	0.00497198	Up	Q4
P46776	RPL27A	1.872	0.00770759	Up	Q3
P78563	ADARB1	0.329	0.00855486	Down	Q1
Q7Z6I6	ARHGAP30	2.226	0.035603	Up	Q4
P35270	SPR	0.607	0.024382	Down	Q2
Q9Y617	PSAT1	1.998	0.00244647	Up	Q3
Q3ZCQ8	TIMM50	0.438	0.0386647	Down	Q1
P49588	AARS1	0.662	0.0295182	Down	Q2
Q15046	KARS1	1.803	0.00234231	Up	Q3
Q13177	PAK2	1.681	0.00644779	Up	Q3
P53609	PGGT1B	0.418	0.0110202	Down	Q1
Q01813	PFKP	0.511	0.0398233	Down	Q2
Q13113	PDZK1IP1	3.799	0.0161747	Up	Q4
Q29RF7	PDS5A	0.492	0.0122037	Down	Q1
P00491	PNP	1.544	0.00385782	Up	Q3
Q96EP0	RNF31	0.616	0.0384876	Down	Q2
Q86SG5	S100A7A	16.811	2.2746e-07	Up	Q4
Q9Y3D3	MRPS16	2.619	0.0465631	Up	Q4
P24928	POLR2A	1.564	0.0279702	Up	Q3
Q15796	SMAD2	0.193	0.00294278	Down	Q1
P30626	SRI	0.512	0.0245193	Down	Q2
Q15637	SF1	0.45	0.0362292	Down	Q1
P08708	RPS17	1.709	0.00986813	Up	Q3
P62701	RPS4X	1.609	0.00504342	Up	Q3
P82932	MRPS6	1.58	0.0157	Up	Q3
Q9HCY8	S100A14	2.883	0.00056939	Up	Q4
Q6IQ49	SDE2	0.385	0.00689845	Down	Q1
P63165	SUMO1	1.89	0.0348159	Up	Q3
Q13310	PABPC4	1.959	0.00577352	Up	Q3
Q9BYG4	PARD6G	2.883	0.000302404	Up	Q4
Q86YV0	RASAL3	0.365	0.0255551	Down	Q1
P54727	RAD23B	0.545	0.00796878	Down	Q2
Q14997	PSME4	2.068	0.0128742	Up	Q4
P06737	PYGL	0.591	0.0431897	Down	Q2
Q09028	RBBP4	1.533	0.00155885	Up	Q3
P62424	RPL7A	1.683	0.00466778	Up	Q3
Q6UWP8	SBSN	1.578	0.0433018	Up	Q3
P04179	SOD2	1.537	0.0259927	Up	Q3
Q9BWJ5	SF3B5	1.648	0.0429982	Up	Q3
Q687X5	STEAP4	2.117	0.00811266	Up	Q4
Q9BRA2	TXNDC17	2.865	0.000108176	Up	Q4
P22532	SPRR2D	16.387	5.86642e-06	Up	Q4
P19971	TYMP	1.591	0.0081398	Up	Q3
P04004	VTN	0.36	0.002943	Down	Q1
Q9UPU7	TBC1D2B	0.589	0.0192062	Down	Q2
Q9BVT8	TMUB1	1.765	0.0108715	Up	Q3
P22090	RPS4Y1	1.602	0.0150397	Up	Q3
O75116	ROCK2	0.622	0.0373469	Down	Q2
Q01995	TAGLN	0.411	0.0412469	Down	Q1
Q969X6	UTP4	14.165	0.00424035	Up	Q4
P21980	TGM2	0.256	0.000593441	Down	Q1
Q12888	TP53BP1	0.412	0.00329025	Down	Q1
Q15061	WDR43	2.181	0.0272632	Up	Q4
Q02878	RPL6	1.929	0.000537482	Up	Q3
Q13151	HNRNPA0	1.645	0.0117597	Up	Q3
P62888	RPL30	1.843	0.0331362	Up	Q3
P05387	RPLP2	1.769	0.00768569	Up	Q3
Q9UL46	PSME2	1.556	0.0186511	Up	Q3
Q93062	RBPMS	0.377	0.00637027	Down	Q1
Q12899	TRIM26	1.801	0.0221013	Up	Q3
P11217	PYGM	0.155	0.033529	Down	Q1
Q8N5L8	RPP25L	1.701	0.017278	Up	Q3
O95602	POLR1A	0.325	0.00807502	Down	Q1
P02753	RBP4	0.451	0.0329214	Down	Q1
P40429	RPL13A	2.026	0.00246055	Up	Q4
P62875	POLR2L	1.556	0.00217967	Up	Q3
P52435	POLR2J	3.161	0.0255075	Up	Q4
P52815	MRPL12	2.439	0.0327943	Up	Q4
P39019	RPS19	2.241	0.000598623	Up	Q4
P62249	RPS16	1.627	0.020052	Up	Q3
P62857	RPS28	1.955	0.0134854	Up	Q3
Q9UMS6	SYNPO2	0.506	0.0114452	Down	Q2
Q9NYB0	TERF2IP	0.575	0.00708058	Down	Q2
O14776	TCERG1	1.522	0.00807296	Up	Q3
P29144	TPP2	0.513	0.0418748	Down	Q2
Q9H0D6	XRN2	1.781	0.0134254	Up	Q3
O15213	WDR46	2.082	0.000728802	Up	Q4
P51665	PSMD7	1.851	0.00677753	Up	Q3
P83731	RPL24	1.657	0.00427533	Up	Q3
P18621	RPL17	2.126	0.000238506	Up	Q4
Q9BQ50	TREX2	2.176	0.00516959	Up	Q4
P02787	TF	0.426	0.0199345	Down	Q1
P18124	RPL7	1.83	0.00580719	Up	Q3
P05388	RPLP0	1.894	0.0102285	Up	Q3
Q14134	TRIM29	1.932	0.00866405	Up	Q3
P62277	RPS13	1.623	0.00146839	Up	Q3
P62244	RPS15A	1.64	0.00659241	Up	Q3
Q13509	TUBB3	2.985	0.00104273	Up	Q4
Q4V9L6	TMEM119	0.488	0.0461187	Down	Q1
Q13641	TPBG	0.198	0.017406	Down	Q1
Q16890	TPD52L1	3.108	0.00671927	Up	Q4
Q8TED0	UTP15	2.856	0.0461976	Up	Q4
P63220	RPS21	2.242	0.00069679	Up	Q4
Q96FQ6	S100A16	1.687	0.0131624	Up	Q3
Q86TI0	TBC1D1	0.338	0.041204	Down	Q1
Q99614	TTC1	2.84	0.000155654	Up	Q4
Q9UM00	TMCO1	1.955	0.0211585	Up	Q3
Q9UID3	VPS51	0.371	0.00486724	Down	Q1
Q8IYM9	TRIM22	0.268	0.0168229	Down	Q1
P49746	THBS3	0.613	0.0448156	Down	Q2
Q5R3I4	TTC38	0.478	0.0309692	Down	Q1
Q9UQ13	SHOC2	1.849	0.00103222	Up	Q3
P11387	TOP1	1.722	0.000574202	Up	Q3
P22528	SPRR1B	2.567	0.00523659	Up	Q4
Q96JC1	VPS39	0.279	0.0320436	Down	Q1
A0AVT1	UBA6	1.642	0.0177382	Up	Q3
Q13426	XRCC4	1.798	0.0498794	Up	Q3
O75888	TNFSF13	0.083	0.0105019	Down	Q1
Q93008	USP9X	0.581	0.0390057	Down	Q2
P13727	PRG2	0.132	0.0270514	Down	Q1
P68036	UBE2L3	1.525	0.0314341	Up	Q3
P13693	TPT1	2.367	7.92455e-05	Up	Q4
Q07283	TCHH	0.521	0.0235611	Down	Q2
P18887	XRCC1	0.504	0.018723	Down	Q2
O75351	VPS4B	1.562	0.00132157	Up	Q3
O00233	PSMD9	0.406	0.00602714	Down	Q1
Q9BUF5	TUBB6	1.855	0.00587043	Up	Q3
Q9P0L0	VAPA	1.521	0.00996848	Up	Q3
O76024	WFS1	0.301	0.000234433	Down	Q1
Q9BQB6	VKORC1	0.251	0.00142858	Down	Q1
Q8NEW0	SLC30A7	0.46	0.0155093	Down	Q1
Q6VEQ5	WASH2P	1.986	0.00814226	Up	Q3
Q8TBC5	ZSCAN18	3.479	0.00137713	Up	Q4
P46937	YAP1	1.519	0.0432776	Up	Q3
Q9Y2W2	WBP11	1.658	0.0460558	Up	Q3
Q9NUJ1	ABHD10	0.327	0.00226829	Down	Q1
A8K2U0	A2ML1	4.063	0.000288857	Up	Q4
P31946	YWHAB	2.072	0.00019337	Up	Q4
P01011	SERPINA3	0.371	0.00165054	Down	Q1
P49902	NT5C2	1.81	0.0320216	Up	Q3
P35858	IGFALS	0.03	0.00733061	Down	Q1
P24298	GPT	0.197	0.0172155	Down	Q1
Q9UEY8	ADD3	0.463	0.00390013	Down	Q1
P35611	ADD1	0.483	0.00136982	Down	Q1
P35612	ADD2	0.195	0.0118559	Down	Q1
P02649	APOE	0.433	0.00152487	Down	Q1
Q92974	ARHGEF2	0.431	0.0132934	Down	Q1
P20290	BTF3	0.504	0.0322466	Down	Q2
Q9UIG0	BAZ1B	0.471	0.0121206	Down	Q1
Q8TD16	BICD2	1.525	0.0340365	Up	Q3
Q03135	CAV1	0.65	0.0291365	Down	Q2
Q9H773	DCTPP1	1.906	0.0183125	Up	Q3
Q9NR30	DDX21	2.396	0.000317816	Up	Q4
P04040	CAT	0.319	0.00265135	Down	Q1
Q86XP3	DDX42	1.563	0.0310615	Up	Q3
Q8TDD1	DDX54	1.913	0.0324834	Up	Q3
P45973	CBX5	2.299	0.0039828	Up	Q4
Q9BY43	CHMP4A	1.559	0.0281462	Up	Q3
Q8IWA5	SLC44A2	0.383	0.00636867	Down	Q1
Q9NUQ9	CYRIB	1.742	0.00229648	Up	Q3
P21589	NT5E	0.441	0.0250415	Down	Q1
Q9NYF8	BCLAF1	0.349	0.0153403	Down	Q1
Q15847	ADIRF	0.628	0.0416656	Down	Q2
P61604	HSPE1	1.949	1.03497e-05	Up	Q3
Q10588	BST1	0.249	0.0421689	Down	Q1
Q8WWI5	SLC44A1	0.172	0.0209965	Down	Q1
Q05397	PTK2	0.626	0.00171606	Down	Q2
P16401	H1-5	1.556	0.00512236	Up	Q3
Q5TEC6	H3-2	0.656	0.0144627	Down	Q2
P80217	IFI35	2.26	0.0150389	Up	Q4
A0A075B6R9	IGKV2D-24	0.39	0.00888769	Down	Q1
Q9Y383	LUC7L2	1.522	0.0167374	Up	Q3
P36776	LONP1	0.624	0.00831544	Down	Q2
Q9UKD2	MRTO4	3.521	0.0145452	Up	Q4
Q8WZ82	OVCA2	3.009	0.000198407	Up	Q4
P09466	PAEP	0.327	0.0144522	Down	Q1
Q8WUM4	PDCD6IP	0.639	0.00832308	Down	Q2
O75781	PALM	0.5	0.0395401	Down	Q2
P08195	SLC3A2	2.476	0.0028241	Up	Q4
O95833	CLIC3	2.789	0.00948376	Up	Q4
P50238	CRIP1	0.584	0.0178447	Down	Q2
P51659	HSD17B4	1.662	0.00262746	Up	Q3
P00450	CP	0.354	0.00888845	Down	Q1
O95786	DDX58	1.918	0.0299872	Up	Q3
P41567	EIF1	1.775	0.0215884	Up	Q3
Q96FZ2	HMCES	3.143	0.00325133	Up	Q4
P57678	GEMIN4	1.524	0.0231601	Up	Q3
P62879	GNB2	0.471	0.0189386	Down	Q1
A0A0B4J1Y9	IGHV3-72	0.49	0.0382248	Down	Q1
Q16666	IFI16	2.054	0.000164172	Up	Q4
O14920	IKBKB	2.158	9.38445e-05	Up	Q4
Q8WUF5	PPP1R13L	0.37	0.0341637	Down	Q1
P14621	ACYP2	0.295	0.0136457	Down	Q1
P78536	ADAM17	0.543	0.041614	Down	Q2
Q53H12	AGK	0.481	0.0162949	Down	Q1
Q9Y4X5	ARIH1	0.496	0.0291271	Down	Q1
Q9UJX3	ANAPC7	0.327	0.0238869	Down	Q1
Q9Y6Q5	AP1M2	0.413	0.0497173	Down	Q1
P20073	ANXA7	0.643	0.0012164	Down	Q2
P08243	ASNS	6.068	0.0164808	Up	Q4
O75947	ATP5PD	1.929	0.0265119	Up	Q3
P22792	CPN2	0.398	0.0238707	Down	Q1
Q96HD1	CRELD1	0.402	0.00692841	Down	Q1
O60869	EDF1	1.966	0.000110415	Up	Q3
P17661	DES	0.347	0.00635525	Down	Q1
Q13283	G3BP1	2.267	0.00410007	Up	Q4
P60981	DSTN	1.619	0.0295361	Up	Q3
P09417	QDPR	2.325	0.006933	Up	Q4
O00148	DDX39A	2.135	0.00759545	Up	Q4
P36269	GGT5	1.653	0.00168045	Up	Q3
Q13315	ATM	1.845	0.00466821	Up	Q3
Q8WTS1	ABHD5	0.267	0.0101812	Down	Q1
P04217	A1BG	0.304	0.00719122	Down	Q1
Q14137	BOP1	2.65	4.90989e-05	Up	Q4
P05141	SLC25A5	1.785	0.0174478	Up	Q3
P15088	CPA3	0.369	0.0178909	Down	Q1
Q8WUW1	BRK1	0.564	0.00808349	Down	Q2
Q53TN4	CYBRD1	0.293	0.0414434	Down	Q1
O43866	CD5L	0.43	0.0050587	Down	Q1
P13671	C6	0.423	0.0207514	Down	Q1
Q9UKF6	CPSF3	1.934	0.0022288	Up	Q3
Q7Z4W1	DCXR	0.506	0.0234523	Down	Q2
P13716	ALAD	0.397	0.00816215	Down	Q1
Q13643	FHL3	0.554	0.0254073	Down	Q2
P35637	FUS	1.801	0.0205642	Up	Q3
Q06210	GFPT1	0.54	0.0443924	Down	Q2
Q99798	ACO2	0.643	0.0290809	Down	Q2
P07108	DBI	2.37	0.00272104	Up	Q4
P35869	AHR	1.958	0.0381031	Up	Q3
P43353	ALDH3B1	0.402	0.0269855	Down	Q1
Q9ULZ3	PYCARD	1.714	0.00211598	Up	Q3
Q5VT79	ANXA8L1	1.922	0.0126254	Up	Q3
P23786	CPT2	0.432	0.00952986	Down	Q1
P35606	COPB2	1.531	0.0360498	Up	Q3
Q9UQ03	CORO2B	0.381	0.00245992	Down	Q1
P02511	CRYAB	0.295	0.00568857	Down	Q1
Q7L5N1	COPS6	2.059	0.0128476	Up	Q4
P02730	SLC4A1	0.124	0.0298393	Down	Q1
Q9NR28	DIABLO	0.496	0.0336202	Down	Q1
Q86VB7	CD163	0.58	0.0398887	Down	Q2
Q07021	C1QBP	2.558	0.00837251	Up	Q4
P09871	C1S	0.566	0.0161716	Down	Q2
Q6UB35	MTHFD1L	0.37	0.0025259	Down	Q1
Q15021	NCAPD2	1.933	0.0373936	Up	Q3
P01024	C3	0.423	0.00676013	Down	Q1
Q6UVK1	CSPG4	0.561	0.0305479	Down	Q2
O75369	FLNB	0.593	0.000944018	Down	Q2
P13798	APEH	1.567	0.00070042	Up	Q3
Q15057	ACAP2	0.601	0.0284016	Down	Q2
P08697	SERPINF2	0.492	0.00104306	Down	Q1
P63104	YWHAZ	1.508	0.00115531	Up	Q3
P30838	ALDH3A1	2.735	0.0155399	Up	Q4
Q15517	CDSN	2.704	0.00650023	Up	Q4
Q9BPX3	NCAPG	5.281	0.0100445	Up	Q4
Q8NCH0	CHST14	0.299	0.0077836	Down	Q1
Q9Y6C2	EMILIN1	0.429	0.000539893	Down	Q1
Q9NT22	EMILIN3	0.215	0.00230103	Down	Q1
Q96C19	EFHD2	1.712	0.0266664	Up	Q3
Q14315	FLNC	0.5	0.00426902	Down	Q2
Q96AC1	FERMT2	0.63	0.00868126	Down	Q2
Q96GQ7	DDX27	2.009	0.00665749	Up	Q4
O95865	DDAH2	0.516	0.00960066	Down	Q2
P01040	CSTA	4.673	0.000662497	Up	Q4
P24534	EEF1B2	2.566	2.57226e-06	Up	Q4
Q12849	GRSF1	1.929	0.000894022	Up	Q3
Q10471	GALNT2	0.524	0.0191597	Down	Q2
O15217	GSTA4	2.351	0.000731177	Up	Q4
Q8WVV9	HNRNPLL	0.456	0.0299154	Down	Q1
O14558	HSPB6	0.211	0.00412219	Down	Q1
P04196	HRG	0.323	0.0047856	Down	Q1
Q9NUP9	LIN7C	2.102	0.000952672	Up	Q4
Q9H008	LHPP	0.55	0.0192399	Down	Q2
P33121	ACSL1	0.543	0.0304715	Down	Q2
P02747	C1QC	0.587	0.0175659	Down	Q2
Q9Y2T2	AP3M1	1.948	0.00799234	Up	Q3
P01008	SERPINC1	0.572	0.000149291	Down	Q2
P00966	ASS1	0.622	0.0191312	Down	Q2
P61158	ACTR3	1.524	0.00405445	Up	Q3
O75937	DNAJC8	1.525	0.00909532	Up	Q3
Q15782	CHI3L2	12.488	0.0153136	Up	Q4
Q8N129	CNPY4	0.442	0.000850754	Down	Q1
Q16643	DBN1	0.601	0.00930603	Down	Q2
Q9H4G0	EPB41L1	3.207	0.0234879	Up	Q4
Q02487	DSC2	2.363	0.0354814	Up	Q4
Q14574	DSC3	1.626	0.042411	Up	Q3
Q13617	CUL2	1.712	0.0408176	Up	Q3
Q13619	CUL4A	0.22	0.0103712	Down	Q1
Q92917	GPKOW	1.987	0.0422987	Up	Q3
Q05639	EEF1A2	2.576	0.00189105	Up	Q4
Q9BQN1	FAM83C	5.565	0.00346163	Up	Q4
Q7Z2K6	ERMP1	0.634	0.0409253	Down	Q2
Q96CD0	FBXL8	0.643	0.0404899	Down	Q2
P02775	PPBP	0.26	0.00280509	Down	Q1
Q13045	FLII	1.901	0.000800553	Up	Q3
P04080	CSTB	2.627	0.000198529	Up	Q4
Q7L5L3	GDPD3	2.608	0.0415627	Up	Q4
Q9NQX3	GPHN	0.633	0.018566	Down	Q2
Q9NTX5	ECHDC1	0.627	0.00749903	Down	Q2
P01903	HLA-DRA	1.565	0.0317327	Up	Q3
Q9UHL4	DPP7	0.525	0.00927586	Down	Q2
P06733	ENO1	1.537	0.00340864	Up	Q3
O15371	EIF3D	1.658	0.00380714	Up	Q3
P00742	F10	0.485	0.0178122	Down	Q1
Q13630	GFUS	0.485	0.0484583	Down	Q1
Q14624	ITIH4	0.238	0.0017676	Down	Q1
P69905	HBA1	0.186	0.0445744	Down	Q1
O75891	ALDH1L1	0.471	0.00291418	Down	Q1
P00813	ADA	0.466	0.0444046	Down	Q1
Q96SZ5	ADO	2.708	0.00801491	Up	Q4
P05089	ARG1	1.732	0.0439563	Up	Q3
P04003	C4BPA	0.381	0.00269406	Down	Q1
P21397	MAOA	0.339	0.000282513	Down	Q1
Q92688	ANP32B	1.848	0.0447806	Up	Q3
Q9Y4P1	ATG4B	2.147	0.00578538	Up	Q4
Q9UJ71	CD207	0.402	0.0371257	Down	Q1
P0C0L5	C4B	0.452	0.00611581	Down	Q1
P38432	COIL	4.66	0.028935	Up	Q4
Q9GZQ3	COMMD5	2.727	0.0014344	Up	Q4
O95861	BPNT1	1.789	0.0425975	Up	Q3
P08185	SERPINA6	0.264	0.0482523	Down	Q1
O95810	CAVIN2	0.488	0.00548118	Down	Q1
P33151	CDH5	0.553	0.00187838	Down	Q2
Q92466	DDB2	0.523	0.00626128	Down	Q2
Q9Y6E2	BZW2	1.53	0.00184055	Up	Q3
Q96G23	CERS2	1.934	0.0132706	Up	Q3
Q08495	DMTN	0.226	0.0483823	Down	Q1
Q8IXM2	BAP18	1.647	0.00285388	Up	Q3
P53396	ACLY	0.644	0.0113274	Down	Q2
P31947	SFN	2.173	7.94675e-06	Up	Q4
Q9BTE6	AARSD1	0.501	0.00205007	Down	Q2
P02656	APOC3	0.509	0.0441732	Down	Q2
P55212	CASP6	1.515	0.0343916	Up	Q3
Q9BRK5	SDF4	2.17	0.00759678	Up	Q4
P36222	CHI3L1	0.487	0.0193457	Down	Q1
O14618	CCS	0.516	0.000451888	Down	Q2
P86790	CCZ1B	0.32	0.0446368	Down	Q1
Q9Y281	CFL2	0.411	0.043272	Down	Q1
P28067	HLA-DMA	0.656	0.00911635	Down	Q2
P18858	LIG1	1.952	0.0143973	Up	Q3
P19957	PI3	22.704	1.73468e-05	Up	Q4
O43768	ENSA	0.302	8.22159e-05	Down	Q1
P02751	FN1	0.38	7.2126e-05	Down	Q1
P78347	GTF2I	0.65	0.0465056	Down	Q2
P09211	GSTP1	1.965	5.33939e-06	Up	Q3
Q6ZNF0	ACP7	3.658	0.0322352	Up	Q4
Q9H0P0	NT5C3A	3.069	0.00463334	Up	Q4
P05091	ALDH2	0.639	0.0128378	Down	Q2
O60218	AKR1B10	12.591	1.48175e-08	Up	Q4
P00915	CA1	0.153	0.0106908	Down	Q1
Q8N4X5	AFAP1L2	4.616	0.00664768	Up	Q4
Q13444	ADAM15	0.441	0.0282641	Down	Q1
Q99873	PRMT1	1.942	0.0019411	Up	Q3
P05549	TFAP2A	1.649	0.0419851	Up	Q3
Q06278	AOX1	1.582	0.0365306	Up	Q3
P02647	APOA1	0.367	0.00874741	Down	Q1
O43809	NUDT21	1.873	0.00640451	Up	Q3
P46108	CRK	0.637	0.0205981	Down	Q2
P99999	CYCS	1.918	0.0116004	Up	Q3
P61952	GNG11	0.389	0.00807743	Down	Q1
P26440	IVD	0.338	0.0154435	Down	Q1
P30837	ALDH1B1	0.485	0.03108	Down	Q1
Q02952	AKAP12	0.623	0.00635455	Down	Q2
Q8IUX7	AEBP1	0.546	0.00528755	Down	Q2
P50995	ANXA11	0.592	0.00872693	Down	Q2
Q93084	ATP2A3	0.597	0.0256222	Down	Q2
Q9BT09	CNPY3	1.782	0.0213735	Up	Q3
Q9P107	GMIP	0.512	0.0164918	Down	Q2
P29317	EPHA2	2.229	0.0035335	Up	Q4
Q14320	FAM50A	2.401	0.0223951	Up	Q4
Q8IVF7	FMNL3	0.229	0.0422591	Down	Q1
Q9H479	FN3K	0.238	0.00663827	Down	Q1
P30519	HMOX2	0.404	0.0229309	Down	Q1
P55010	EIF5	1.795	0.00251784	Up	Q3
P33908	MAN1A1	0.58	0.0035296	Down	Q2
Q7Z434	MAVS	0.532	0.0351241	Down	Q2
P19338	NCL	1.536	0.00160488	Up	Q3
Q4VC31	MIX23	1.852	0.00256501	Up	Q3
P09497	CLTB	2.948	0.000139842	Up	Q4
Q9Y696	CLIC4	0.483	0.00333534	Down	Q1
P12314	FCGR1A	0.255	0.00745783	Down	Q1
P26885	FKBP2	2.249	0.0301289	Up	Q4
Q86WN1	FCHSD1	3.137	0.000227599	Up	Q4
P02679	FGG	0.316	0.0209864	Down	Q1
P98095	FBLN2	0.39	0.0335988	Down	Q1
Q9UBX5	FBLN5	0.504	0.00428013	Down	Q2
P34897	SHMT2	1.96	0.00612552	Up	Q3
P52597	HNRNPF	2.162	0.00246052	Up	Q4
Q15181	PPA1	1.656	9.48473e-05	Up	Q3
P12268	IMPDH2	1.534	0.0152306	Up	Q3
Q9BS40	LXN	0.406	0.0482247	Down	Q1
O75608	LYPLA1	1.735	0.00379253	Up	Q3
O95274	LYPD3	2.762	0.000267871	Up	Q4
Q9NQ29	LUC7L	0.531	0.0262833	Down	Q2
P51884	LUM	0.468	0.0428091	Down	Q1
Q14728	MFSD10	0.65	0.0397179	Down	Q2
O14896	IRF6	2.3	0.00438645	Up	Q4
Q9H9S4	CAB39L	0.212	0.00135305	Down	Q1
Q9NZT1	CALML5	2.409	0.00185937	Up	Q4
Q8TDB6	DTX3L	1.788	0.0232197	Up	Q3
P63172	DYNLT1	0.245	0.0273445	Down	Q1
O60841	EIF5B	1.683	0.0075078	Up	Q3
Q13418	ILK	0.649	0.0218198	Down	Q2
P07099	EPHX1	3.322	0.000187107	Up	Q4
Q9BVM4	GGACT	0.409	0.0471909	Down	Q1
P05155	SERPING1	0.508	0.00345487	Down	Q2
A2NJV5	IGKV2-29	0.266	0.0220309	Down	Q1
Q9UBH0	IL36RN	18.524	1.23034e-05	Up	Q4
P03952	KLKB1	0.377	0.00115953	Down	Q1
O00159	MYO1C	0.648	0.00189052	Down	Q2
P23368	ME2	2.878	0.0244628	Up	Q4
Q9H0U3	MAGT1	0.456	0.0435715	Down	Q1
Q9HAN9	NMNAT1	0.613	0.0219006	Down	Q2
Q14210	LY6D	4.457	2.79436e-05	Up	Q4
P55083	MFAP4	0.472	0.00303339	Down	Q1
P55001	MFAP2	0.421	0.00111622	Down	Q1
P01860	IGHG3	0.292	0.0346716	Down	Q1
P63241	EIF5A	1.568	0.000581667	Up	Q3
Q9H0R4	HDHD2	0.384	0.0293208	Down	Q1
P08238	HSP90AB1	1.593	0.000151338	Up	Q3
Q9UJY1	HSPB8	1.809	0.00796526	Up	Q3
P01591	JCHAIN	0.27	0.00120962	Down	Q1
Q9BTT6	LRRC1	1.772	0.0273952	Up	Q3
Q32MZ4	LRRFIP1	0.425	0.0170294	Down	Q1
Q9BQ69	MACROD1	0.476	0.0333109	Down	Q1
Q9NR56	MBNL1	1.511	0.0138584	Up	Q3
P60842	EIF4A1	1.701	0.000668232	Up	Q3
P02533	KRT14	2.262	0.00362626	Up	Q4
Q9ULK4	MED23	2.151	0.0472711	Up	Q4
Q01650	SLC7A5	2.1	0.0181963	Up	Q4
Q13601	KRR1	0.186	0.00376284	Down	Q1
P60985	KRTDAP	3.919	0.00167495	Up	Q4
P10909	CLU	0.3	0.00218223	Down	Q1
Q8IUL8	CILP2	0.128	0.00356822	Down	Q1
Q02413	DSG1	1.514	0.0394849	Up	Q3
P32926	DSG3	2.518	0.00183145	Up	Q4
Q9UQC9	CLCA2	2.624	0.00062529	Up	Q4
Q14746	COG2	0.384	0.00511611	Down	Q1
Q99829	CPNE1	0.518	0.0121147	Down	Q2
Q9HB71	CACYBP	3.036	0.00118284	Up	Q4
Q9NRY5	FAM114A2	0.374	0.0317114	Down	Q1
P55884	EIF3B	1.711	0.028101	Up	Q3
P49770	EIF2B2	1.505	0.0061797	Up	Q3
P68104	EEF1A1	1.662	0.00107136	Up	Q3
Q96K12	FAR2	0.485	0.0143832	Down	Q1
Q14512	FGFBP1	2.86	0.00844664	Up	Q4
B3EWG6	FAM25G	12.448	0.000139435	Up	Q4
P55160	NCKAP1L	0.288	0.0241167	Down	Q1
Q86UU1	PHLDB1	0.643	0.00613097	Down	Q2
P11678	EPX	0.255	0.000739634	Down	Q1
Q15124	PGM5	0.43	0.0349083	Down	Q1
Q8IZL8	PELP1	2.065	0.0038272	Up	Q4
Q9NX24	NHP2	0.506	0.0362547	Down	Q2
Q9BSC4	NOL10	2.671	0.0139201	Up	Q4
P05156	CFI	0.536	0.0272545	Down	Q2
Q07507	DPT	0.361	0.00403717	Down	Q1
P0CG12	DERPC	1.948	0.00617673	Up	Q3
Q15642	TRIP10	0.444	0.0199962	Down	Q1
Q9NZ45	CISD1	0.126	0.00561833	Down	Q1
P02748	C9	0.419	0.00127072	Down	Q1
P07357	C8A	0.494	0.0228673	Down	Q1
P26358	DNMT1	1.96	0.041487	Up	Q3
Q96GG9	DCUN1D1	1.967	0.0351511	Up	Q3
P62495	ETF1	1.782	0.00690656	Up	Q3
Q01469	FABP5	10.413	5.87083e-09	Up	Q4
Q9H6S3	EPS8L2	2.343	7.99786e-05	Up	Q4
P30273	FCER1G	0.434	0.0109807	Down	Q1
Q5W0V3	FHIP2A	0.543	0.0426251	Down	Q2
P08631	HCK	0.212	0.000598154	Down	Q1
P18510	IL1RN	2.023	0.0273564	Up	Q4
P16284	PECAM1	8.638	0.00134479	Up	Q4
Q9H7C9	AAMDC	0.505	0.0448306	Down	Q2
Q9NZD4	AHSP	0.213	0.0399587	Down	Q1
P02760	AMBP	0.461	0.0171872	Down	Q1
P02652	APOA2	0.417	0.0267381	Down	Q1
P30043	BLVRB	0.326	0.000266122	Down	Q1
P12830	CDH1	1.592	0.000869652	Up	Q3
Q9GZR7	DDX24	0.361	0.00568156	Down	Q1
P17844	DDX5	2.532	0.000965721	Up	Q4
Q9UI42	CPA4	1.997	0.0329388	Up	Q3
Q9NVM6	DNAJC17	0.477	0.0343874	Down	Q1
O60832	DKC1	2.024	0.0353762	Up	Q4
Q13268	DHRS2	0.114	0.0372324	Down	Q1
O75844	ZMPSTE24	2.368	0.00414182	Up	Q4
Q13451	FKBP5	1.718	0.0461201	Up	Q3
P35555	FBN1	0.536	0.00226748	Down	Q2
P23142	FBLN1	0.619	0.004883	Down	Q2
P0DOX3	--	0.493	0.034738	Down	Q1
Q13753	LAMC2	1.503	0.027254	Up	Q3
Q92820	GGH	2.185	0.0194249	Up	Q4
P21695	GPD1	0.311	0.0237627	Down	Q1
Q3ZCW2	LGALSL	1.935	0.00177828	Up	Q3
Q68E01	INTS3	0.422	0.00100401	Down	Q1
Q6PKG0	LARP1	2.317	7.18034e-05	Up	Q4
O00182	LGALS9	1.858	0.0453611	Up	Q3
O94832	MYO1D	1.666	0.00677828	Up	Q3
P55209	NAP1L1	1.677	0.00622771	Up	Q3
Q9NQR4	NIT2	0.476	0.0278019	Down	Q1
P55769	SNU13	1.58	0.00539254	Up	Q3
O95867	LY6G6C	2.41	0.0104286	Up	Q4
P61916	NPC2	1.564	0.0126268	Up	Q3
O00712	NFIB	0.537	0.015465	Down	Q2
Q14938	NFIX	0.622	0.0379255	Down	Q2
P16435	POR	2.237	0.0379465	Up	Q4
Q02818	NUCB1	2.06	0.000740367	Up	Q4
P35658	NUP214	2.588	0.00379592	Up	Q4
Q8N3F8	MICALL1	2.185	0.022947	Up	Q4
Q9UNW1	MINPP1	1.995	0.0160437	Up	Q3
P21757	MSR1	0.356	0.00876903	Down	Q1
P27482	CALML3	2.491	0.00173125	Up	Q4
P31689	DNAJA1	1.589	0.0141842	Up	Q3
Q96DC8	ECHDC3	0.155	0.0479066	Down	Q1
Q9BSJ2	TUBGCP2	1.914	0.023092	Up	Q3
O43402	EMC8	0.33	0.0459361	Down	Q1
Q14185	DOCK1	0.489	0.0153268	Down	Q1
Q32P44	EML3	2.052	0.0150058	Up	Q4
Q96C01	FAM136A	2.743	0.015238	Up	Q4
Q02790	FKBP4	1.746	0.010005	Up	Q3
O75636	FCN3	0.279	0.038718	Down	Q1
P02675	FGB	0.248	0.00323626	Down	Q1
P35052	GPC1	2.226	0.011733	Up	Q4
Q9BY32	ITPA	2.43	0.0126378	Up	Q4
Q7Z794	KRT77	0.214	0.000491595	Down	Q1
P19823	ITIH2	0.415	0.0100173	Down	Q1
P12532	CKMT1A	2.164	0.000816334	Up	Q4
Q13442	PDAP1	0.646	0.00757052	Down	Q2
Q96A33	CCDC47	3.677	2.80349e-05	Up	Q4
Q9H0R1	AP5M1	0.401	0.0423935	Down	Q1
P16157	ANK1	0.159	0.0175932	Down	Q1
Q13510	ASAH1	0.4	0.00138592	Down	Q1
P54709	ATP1B3	2.441	0.00500992	Up	Q4
Q9Y6G9	DYNC1LI1	1.788	0.0135786	Up	Q3
Q9BWS9	CHID1	0.45	0.0376821	Down	Q1
Q9H4M9	EHD1	0.561	0.0224363	Down	Q2
Q14344	GNA13	0.157	0.00370735	Down	Q1
Q9BVP2	GNL3	2.042	0.00650239	Up	Q4
Q9NZD2	GLTP	5.329	0.000584752	Up	Q4
P50148	GNAQ	0.489	0.000564116	Down	Q1
P07305	H1-0	0.494	0.00150025	Down	Q1
A0A075B6I9	IGLV7-46	0.495	0.0376253	Down	Q1
P56199	ITGA1	1.903	0.0242635	Up	Q3
P27361	MAPK3	0.597	0.0481045	Down	Q2
O15540	FABP7	0.386	0.0248336	Down	Q1
Q9NPA8	ENY2	1.858	0.0292629	Up	Q3
P16452	EPB42	0.16	0.0273388	Down	Q1
Q92520	FAM3C	5.833	0.0489275	Up	Q4
P22352	GPX3	0.449	0.0030895	Down	Q1
Q9BZE4	GTPBP4	2.052	0.00594171	Up	Q4
Q9H665	IGFLR1	0.291	0.00382333	Down	Q1
Q14116	IL18	1.789	0.015661	Up	Q3
P54819	AK2	0.486	0.0186079	Down	Q1
P33527	ABCC1	2.373	0.00704421	Up	Q4
O00515	LAD1	1.839	0.00390178	Up	Q3
P16455	MGMT	0.233	0.0466724	Down	Q1
P31153	MAT2A	1.632	0.00876213	Up	Q3
Q9UKK9	NUDT5	1.913	0.00119312	Up	Q3
Q96DE0	NUDT16	0.468	0.0291582	Down	Q1
Q5SRE5	NUP188	1.83	0.0084525	Up	Q3
Q86U42	PABPN1	1.583	0.0246251	Up	Q3
P46109	CRKL	1.512	0.00363328	Up	Q3
Q9HCG8	CWC22	1.812	0.0440195	Up	Q3
P13611	VCAN	0.483	0.0108978	Down	Q1
P08174	CD55	0.38	0.00876052	Down	Q1
Q8WUP2	FBLIM1	0.125	0.0111012	Down	Q1
P02671	FGA	0.258	0.00319187	Down	Q1
P00748	F12	0.436	0.00717447	Down	Q1
A6ND36	FAM83G	4.586	0.00372981	Up	Q4
P13224	GP1BB	0.327	0.0202401	Down	Q1
Q96G21	IMP4	2.832	0.00428233	Up	Q4
P60983	GMFB	1.564	0.0139204	Up	Q3
Q6Y1H2	HACD2	0.558	0.0398181	Down	Q2
P02042	HBD	0.156	0.0249784	Down	Q1
Q8IVU3	HERC6	8.511	0.0387547	Up	Q4
O15116	LSM1	0.314	0.0164047	Down	Q1
Q8NC51	SERBP1	1.702	0.0407007	Up	Q3
O00151	PDLIM1	1.695	0.00213433	Up	Q3
P51178	PLCD1	0.365	0.0198558	Down	Q1
O60240	PLIN1	0.268	0.0238427	Down	Q1
P01871	IGHM	0.381	0.0134188	Down	Q1
Q6P1A2	LPCAT3	0.628	0.0293839	Down	Q2
P78344	EIF4G2	2.119	0.00757874	Up	Q4
P29966	MARCKS	0.41	0.0493236	Down	Q1
P33993	MCM7	1.964	0.0466342	Up	Q3
P10620	MGST1	0.268	0.00738007	Down	Q1
Q14149	MORC3	0.16	0.00401107	Down	Q1
P05976	MYL1	0.008	0.0435928	Down	Q1
P20591	MX1	4.237	0.000535398	Up	Q4
Q9UBB6	NCDN	2.595	0.00278253	Up	Q4
Q8NFW8	CMAS	2.371	0.031951	Up	Q4
P14923	JUP	1.93	0.0233618	Up	Q3
P08473	MME	0.382	0.00147776	Down	Q1
P62136	PPP1CA	1.602	0.00476004	Up	Q3
Q9NWS0	PIH1D1	0.416	0.043247	Down	Q1
P05154	SERPINA5	0.316	0.00681586	Down	Q1
P17275	JUNB	1.512	0.0294517	Up	Q3
P19012	KRT15	0.533	0.0198171	Down	Q2
P04259	KRT6B	5.083	0.000142238	Up	Q4
Q9UKQ9	KLK9	6.397	6.06761e-05	Up	Q4
Q92876	KLK6	5.234	0.0116647	Up	Q4
P01619	IGKV3-20	0.494	0.0472379	Down	Q1
P32004	L1CAM	0.297	0.0006509	Down	Q1
P50281	MMP14	0.533	0.0036044	Down	Q2
Q99417	MYCBP	2.604	3.20876e-06	Up	Q4
Q8WUM0	NUP133	0.582	0.0457297	Down	Q2
Q8TB72	PUM2	0.334	0.00127189	Down	Q1
Q6VY07	PACS1	0.448	0.0203919	Down	Q1
P49773	HINT1	1.628	0.0061093	Up	Q3
P05546	SERPIND1	0.278	0.00791487	Down	Q1
Q5SSJ5	HP1BP3	0.589	0.0327772	Down	Q2
Q96MM6	HSPA12B	0.425	0.00224862	Down	Q1
O43301	HSPA12A	0.218	0.00231099	Down	Q1
Q15648	MED1	1.511	0.00517044	Up	Q3
Q8N4P3	HDDC3	0.34	0.0360597	Down	Q1
Q9UHB6	LIMA1	0.405	0.00459785	Down	Q1
P15531	NME1	1.591	0.00526347	Up	Q3
Q9ULX3	NOB1	2.704	0.00181222	Up	Q4
Q9Y3T9	NOC2L	3.031	0.00037648	Up	Q4
Q15555	MAPRE2	0.39	0.00403854	Down	Q1
Q8WXF1	PSPC1	0.331	0.0315378	Down	Q1
O14732	IMPA2	2.32	0.00838305	Up	Q4
Q08380	LGALS3BP	1.722	0.015869	Up	Q3
Q92764	KRT35	0.276	0.0107758	Down	Q1
P47224	RABIF	2.263	0.026098	Up	Q4
Q96AG4	LRRC59	1.895	0.00347793	Up	Q3
Q9UBG0	MRC2	0.659	0.0248409	Down	Q2
Q8IXH7	NELFCD	1.589	0.0219099	Up	Q3
Q14980	NUMA1	0.613	2.56728e-05	Down	Q2
P48147	PREP	5.661	0.000852888	Up	Q4
Q06323	PSME1	1.595	0.00486433	Up	Q3
P98179	RBM3	1.816	0.0108135	Up	Q3
Q8N573	OXR1	0.167	0.000457716	Down	Q1
Q13613	MTMR1	2.258	0.0472936	Up	Q4
Q86TB9	PATL1	0.404	0.00630452	Down	Q1
Q15154	PCM1	2.375	0.0106889	Up	Q4
Q5JVF3	PCID2	2.579	0.00131575	Up	Q4
Q9UHG3	PCYOX1	0.661	0.00760804	Down	Q2
P61457	PCBD1	0.476	0.0429184	Down	Q1
P61970	NUTF2	1.531	0.0162434	Up	Q3
O60831	PRAF2	0.471	0.0260543	Down	Q1
P62195	PSMC5	1.528	0.00242049	Up	Q3
Q8WWY3	PRPF31	0.303	0.0140089	Down	Q1
Q13523	PRPF4B	1.583	0.0494096	Up	Q3
O60502	OGA	1.868	0.0373578	Up	Q3
Q9BX68	HINT2	2.062	0.0228619	Up	Q4
Q9BSH5	HDHD3	0.604	0.0178517	Down	Q2
Q9BUP3	HTATIP2	0.407	0.00209373	Down	Q1
O15347	HMGB3	4.123	2.62304e-05	Up	Q4
O43240	KLK10	3.59	0.000127866	Up	Q4
Q13765	NACA	2.23	0.00143013	Up	Q4
Q32P28	P3H1	0.597	0.0285108	Down	Q2
Q9UQ80	PA2G4	1.685	0.00138307	Up	Q3
P35241	RDX	1.732	0.0297884	Up	Q3
Q96Q06	PLIN4	0.556	0.0462764	Down	Q2
Q8N271	PROM2	1.758	0.0151531	Up	Q3
O60828	PQBP1	1.737	0.0292153	Up	Q3
P15309	ACP3	3.185	0.00411264	Up	Q4
P49768	PSEN1	0.269	0.00297801	Down	Q1
Q9Y646	CPQ	0.399	0.016112	Down	Q1
P00918	CA2	0.285	0.0082966	Down	Q1
O00461	GOLIM4	0.29	0.030015	Down	Q1
P12081	HARS1	1.518	0.0223779	Up	Q3
Q92769	HDAC2	1.637	0.000801591	Up	Q3
O14979	HNRNPDL	1.501	0.0131363	Up	Q3
Q6NY19	KANK3	0.232	0.0161519	Down	Q1
P29536	LMOD1	0.342	0.043929	Down	Q1
P41227	NAA10	3.25	0.000686356	Up	Q4
Q9UM54	MYO6	0.122	0.0102146	Down	Q1
P32119	PRDX2	0.378	0.00159743	Down	Q1
Q53GL7	PARP10	0.297	0.0458454	Down	Q1
O75791	GRAP2	1.8	0.0367494	Up	Q3
Q9UBY9	HSPB7	0.522	0.0182367	Down	Q2
P10321	HLA-C	2.247	0.00697929	Up	Q4
Q66K74	MAP1S	0.567	0.0443784	Down	Q2
Q96J02	ITCH	0.195	0.0104232	Down	Q1
Q9NR99	MXRA5	0.417	0.0220369	Down	Q1
P43490	NAMPT	1.678	0.0107948	Up	Q3
O95298	NDUFC2	0.414	0.0314313	Down	Q1
Q14498	RBM39	1.555	0.00925178	Up	Q3
Q16778	H2BC21	0.628	0.0399979	Down	Q2
P68871	HBB	0.215	0.0282787	Down	Q1
O43847	NRDC	1.767	0.00232427	Up	Q3
P51003	PAPOLA	1.781	0.000789856	Up	Q3
O43252	PAPSS1	1.577	0.00194051	Up	Q3
O60925	PFDN1	1.759	0.0122071	Up	Q3
Q9NQP4	PFDN4	1.574	0.0370782	Up	Q3
O00469	PLOD2	0.377	0.0130353	Down	Q1
Q9Y3B7	MRPL11	0.053	0.000390563	Down	Q1
Q8N122	RPTOR	0.331	0.0331917	Down	Q1
Q8IY81	FTSJ3	1.795	0.0488293	Up	Q3
Q9HAT2	SIAE	0.413	0.030126	Down	Q1
P53992	SEC24C	0.41	0.000577002	Down	Q1
O75635	SERPINB7	2.935	0.0252862	Up	Q4
Q15047	SETDB1	0.45	0.022656	Down	Q1
Q9BYE4	SPRR2G	1.949	0.0112901	Up	Q3
Q86V81	ALYREF	1.565	0.00764368	Up	Q3
Q5H9L2	TCEAL5	0.372	0.0150539	Down	Q1
Q9NRV9	HEBP1	0.363	0.00854519	Down	Q1
Q9H583	HEATR1	5.931	0.00550529	Up	Q4
Q7Z4Q2	HEATR3	2.193	0.0082969	Up	Q4
Q9NZU5	LMCD1	0.628	0.0189226	Down	Q2
P0DOX7	--	0.398	0.021334	Down	Q1
O75342	ALOX12B	1.678	0.0178011	Up	Q3
P29218	IMPA1	1.563	0.047943	Up	Q3
O95373	IPO7	1.756	0.00260227	Up	Q3
Q13557	CAMK2D	0.628	0.00850788	Down	Q2
O60259	KLK8	3.19	0.0102189	Up	Q4
Q8TBQ9	TMEM167A	3.855	0.00307129	Up	Q4
Q99471	PFDN5	2.184	0.0228349	Up	Q4
P12694	BCKDHA	0.226	0.044034	Down	Q1
P11940	PABPC1	2.852	0.000130181	Up	Q4
Q8TCU6	PREX1	0.632	0.00178732	Down	Q2
O60518	RANBP6	1.751	0.0343284	Up	Q3
P35244	RPA3	1.748	0.00822632	Up	Q3
P61353	RPL27	1.961	0.000619828	Up	Q3
P63173	RPL38	1.783	0.0243035	Up	Q3
P29034	S100A2	7.979	3.55476e-07	Up	Q4
P31151	S100A7	19.269	1.05405e-07	Up	Q4
P05109	S100A8	6.59	4.79387e-06	Up	Q4
P06702	S100A9	7.549	2.61377e-06	Up	Q4
P19388	POLR2E	0.419	0.0247512	Down	Q1
Q6P5R6	RPL22L1	3.09	0.0183949	Up	Q4
P62750	RPL23A	1.957	0.000868822	Up	Q3
P62847	RPS24	1.722	0.00985657	Up	Q3
P57105	SYNJ2BP	6.571	6.17349e-05	Up	Q4
P62304	SNRPE	1.761	0.00702266	Up	Q3
P82930	MRPS34	1.69	0.0285085	Up	Q3
Q96B97	SH3KBP1	0.666	0.0222835	Down	Q2
Q96PD5	PGLYRP2	0.494	0.023555	Down	Q1
O15212	PFDN6	2.03	0.000101182	Up	Q4
Q96HC4	PDLIM5	1.709	0.0389602	Up	Q3
Q9Y446	PKP3	1.873	0.0155978	Up	Q3
P25788	PSMA3	0.404	0.00714841	Down	Q1
P20340	RAB6A	0.544	0.0464427	Down	Q2
P29373	CRABP2	3.954	0.000150015	Up	Q4
P49848	TAF6	4.079	0.0393166	Up	Q4
Q9H1E1	RNASE7	2.896	0.00370453	Up	Q4
P09651	HNRNPA1	1.85	0.00304071	Up	Q3
P78330	PSPH	0.373	0.0180145	Down	Q1
P60174	TPI1	1.645	0.00638503	Up	Q3
P11172	UMPS	5.177	6.30077e-05	Up	Q4
O14933	UBE2L6	3.222	0.00344637	Up	Q4
P84098	RPL19	1.64	0.0063535	Up	Q3
Q96P16	RPRD1A	2.546	0.0130643	Up	Q4
P49908	SELENOP	0.253	0.00372314	Down	Q1
P08294	SOD3	0.183	0.000456103	Down	Q1
Q9BW30	TPPP3	0.616	0.0467974	Down	Q2
Q15366	PCBP2	1.64	0.0395892	Up	Q3
Q00169	PITPNA	1.789	0.0150387	Up	Q3
Q13835	PKP1	2.003	0.011099	Up	Q4
Q9UKN8	GTF3C4	0.434	0.00322631	Down	Q1
P02549	SPTA1	0.242	0.00405325	Down	Q1
O15042	U2SURP	1.658	0.010675	Up	Q3
P46782	RPS5	1.883	0.00180179	Up	Q3
P62851	RPS25	1.673	0.0116437	Up	Q3
P26639	TARS1	1.628	0.000164351	Up	Q3
P23381	WARS1	3.191	0.0290296	Up	Q4
P37802	TAGLN2	1.604	0.00384014	Up	Q3
Q9Y6M7	SLC4A7	97.89	2.81712e-07	Up	Q4
P17900	GM2A	3.531	0.00163594	Up	Q4
Q9P0V9	SEPTIN10	0.368	0.0023997	Down	Q1
O60613	SELENOF	2.372	0.0125782	Up	Q4
O95171	SCEL	0.301	0.0128365	Down	Q1
Q08188	TGM3	2.763	0.000473475	Up	Q4
O00193	SMAP	2.306	0.0342335	Up	Q4
Q2TAY7	SMU1	1.606	0.0010702	Up	Q3
Q8IX01	SUGP2	0.476	0.0481699	Down	Q1
Q9NWC5	TMEM45A	5.121	0.00342266	Up	Q4
Q9Y5J9	TIMM8B	2.113	0.000239276	Up	Q4
P40763	STAT3	1.699	3.84919e-05	Up	Q3
O75874	IDH1	0.303	0.0170867	Down	Q1
Q96F15	GIMAP5	0.334	0.0165404	Down	Q1
O60573	EIF4E2	2.723	0.0405251	Up	Q4
Q96S97	MYADM	0.643	0.00162142	Down	Q2
O14818	PSMA7	1.738	0.0104334	Up	Q3
Q92878	RAD50	0.665	0.0156522	Down	Q2
P62273	RPS29	2.112	0.00753405	Up	Q4
Q9NZH8	IL36G	93.211	8.73686e-09	Up	Q4
P52789	HK2	2.367	0.0100989	Up	Q4
Q14145	KEAP1	3.955	0.0264646	Up	Q4
P01042	KNG1	0.381	0.00673084	Down	Q1
P16333	NCK1	0.392	0.0203089	Down	Q1
Q5TFE4	NT5DC1	5.699	0.000276099	Up	Q4
Q15223	NECTIN1	2.128	0.0271055	Up	Q4
Q9NP72	RAB18	2.234	0.0158493	Up	Q4
Q13017	ARHGAP5	2.057	0.0109744	Up	Q4
Q07020	RPL18	1.509	0.029068	Up	Q3
Q9NSE4	IARS2	0.385	0.000769523	Down	Q1
P49591	SARS1	1.505	0.00744317	Up	Q3
P39023	RPL3	2.051	0.00429853	Up	Q4
P04843	RPN1	0.65	0.00729828	Down	Q2
P19474	TRIM21	0.646	0.0172708	Down	Q2
P56182	RRP1	0.412	0.026283	Down	Q1
P60866	RPS20	1.686	0.00585849	Up	Q3
Q5K4L6	SLC27A3	1.637	0.0483169	Up	Q3
P48594	SERPINB4	5.488	0.00320195	Up	Q4
P29508	SERPINB3	6.363	0.00024755	Up	Q4
O96008	TOMM40	12.045	0.00332212	Up	Q4
Q8N4H5	TOMM5	2.021	0.0323639	Up	Q4
Q9H330	TMEM245	0.299	0.0122707	Down	Q1
Q8NF37	LPCAT1	0.296	0.00112689	Down	Q1
P62913	RPL11	1.692	0.00126187	Up	Q3
P63244	RACK1	1.551	0.00406029	Up	Q3
P61313	RPL15	1.556	0.0233077	Up	Q3
Q9UGK3	STAP2	3.383	0.0162058	Up	Q4
Q9UKX7	NUP50	7.967	2.44404e-05	Up	Q4
O00487	PSMD14	1.55	0.00532266	Up	Q3
P62241	RPS8	0.222	0.0188893	Down	Q1
P15880	RPS2	2.122	0.000506313	Up	Q4
O95197	RTN3	0.361	0.00662388	Down	Q1
O95359	TACC2	2.335	0.0205149	Up	Q4
P13984	GTF2F2	1.91	0.0120191	Up	Q3
Q96FV9	THOC1	1.568	0.0190416	Up	Q3
Q96HN2	AHCYL2	0.409	0.0235934	Down	Q1
P36952	SERPINB5	1.877	0.014436	Up	Q3
Q02083	NAAA	1.632	0.0238492	Up	Q3
P36955	SERPINF1	0.609	0.0272126	Down	Q2
Q96SB3	PPP1R9B	0.489	0.0132442	Down	Q1
P19838	NFKB1	0.141	0.00318302	Down	Q1
Q08J23	NSUN2	1.806	0.0149253	Up	Q3
Q6L8Q7	PDE12	2.072	0.00101454	Up	Q4
O00541	PES1	3.457	0.000852608	Up	Q4
Q08752	PPID	0.455	0.0318008	Down	Q1
P80188	LCN2	1.557	0.0252715	Up	Q3
P0CG38	POTEI	1.762	0.0122596	Up	Q3
Q8TD55	PLEKHO2	0.581	0.0385814	Down	Q2
Q8WVV4	POF1B	1.629	0.023259	Up	Q3
P19174	PLCG1	2.032	0.0434516	Up	Q4
Q9Y3C6	PPIL1	1.934	0.000161965	Up	Q3
P80511	S100A12	1.77	0.0193532	Up	Q3
Q99575	POP1	3.487	0.0042466	Up	Q4
P62081	RPS7	2.1	0.00016918	Up	Q4
Q9Y224	RTRAF	1.962	0.00281366	Up	Q3
Q8WXH0	SYNE2	0.634	0.0305114	Down	Q2
P00734	F2	0.346	0.00335751	Down	Q1
P16050	ALOX15	0.334	9.59244e-06	Down	Q1
P62826	RAN	1.949	0.00417379	Up	Q3
P18077	RPL35A	1.761	0.0194262	Up	Q3
Q9H4B7	TUBB1	0.508	0.0442408	Down	Q2
P27105	STOM	0.356	0.00949111	Down	Q1
P08582	MELTF	0.199	0.00571398	Down	Q1
P42226	STAT6	0.553	0.00526113	Down	Q2
