# Supplementary material for: Generating detailed intercellular communication patterns in psoriasis at the single-cell level using social networking, pattern recognition, and manifold learning methods to optimize treatment strategies
Source: Aging (Albany NY). 2024 Jan 29;16(3):2194–231. doi: 10.18632/aging.205478 (PMC10911347; doi:10.18632/aging.205478)
Supplement: Supplementary Table 8 [file aging-16-205478-s009.xlsx]

## Sheet: Supplementary Table 8
Supplementary Table 8. High overlap of differential proteins with target genes of cell type specific regulators (CTSRs) in psoriatic and healthy skin pathological areas.
Protein accession	Gene name	Psoriasis/Normal skin Ratio	Psoriasis/Normal P value	Regulated Type
P61158	ACTR3	1.524	0.00405445	Up
Q8IUX7	AEBP1	0.546	0.00528755	Down
P54819	AK2	0.486	0.0186079	Down
O60218	AKR1B10	12.591	1.48175e-08	Up
P05091	ALDH2	0.639	0.0128378	Down
Q92688	ANP32B	1.848	0.0447806	Up
P54709	ATP1B3	2.441	0.00500992	Up
Q8TD16	BICD2	1.525	0.0340365	Up
Q8WUW1	BRK1	0.564	0.00808349	Down
P20290	BTF3	0.504	0.0322466	Down
P09871	C1S	0.566	0.0161716	Down
P27482	CALML3	2.491	0.00173125	Up
Q03135	CAV1	0.65	0.0291365	Down
Q96A33	CCDC47	3.677	2.80349e-05	Up
P12830	CDH1	1.592	0.000869652	Up
Q9UQC9	CLCA2	2.624	0.00062529	Up
Q9Y696	CLIC4	0.483	0.00333534	Down
P09497	CLTB	2.948	0.000139842	Up
P10909	CLU	0.3	0.00218223	Down
Q7L5N1	COPS6	2.059	0.0128476	Up
P15088	CPA3	0.369	0.0178909	Down
P29373	CRABP2	3.954	0.000150015	Up
P01040	CSTA	4.673	0.000662497	Up
P04080	CSTB	2.627	0.000198529	Up
Q53TN4	CYBRD1	0.293	0.0414434	Down
P99999	CYCS	1.918	0.0116004	Up
P07108	DBI	2.37	0.00272104	Up
Q9NR30	DDX21	2.396	0.000317816	Up
P17844	DDX5	2.532	0.000965721	Up
P31689	DNAJA1	1.589	0.0141842	Up
Q02487	DSC2	2.363	0.0354814	Up
Q14574	DSC3	1.626	0.042411	Up
Q02413	DSG1	1.514	0.0394849	Up
P32926	DSG3	2.518	0.00183145	Up
P60981	DSTN	1.619	0.0295361	Up
O60869	EDF1	1.966	0.000110415	Up
P68104	EEF1A1	1.662	0.00107136	Up
P41567	EIF1	1.775	0.0215884	Up
P55884	EIF3B	1.711	0.028101	Up
O15371	EIF3D	1.658	0.00380714	Up
P60842	EIF4A1	1.701	0.000668232	Up
P78344	EIF4G2	2.119	0.00757874	Up
P55010	EIF5	1.795	0.00251784	Up
O60841	EIF5B	1.683	0.0075078	Up
P06733	ENO1	1.537	0.00340864	Up
O43768	ENSA	0.302	8.22159e-05	Down
P62495	ETF1	1.782	0.00690656	Up
P23142	FBLN1	0.619	0.004883	Down
P98095	FBLN2	0.39	0.0335988	Down
P35555	FBN1	0.536	0.00226749	Down
Q14512	FGFBP1	2.86	0.00844664	Up
P35637	FUS	1.801	0.0205642	Up
Q13283	G3BP1	2.267	0.00410007	Up
Q9NZD2	GLTP	5.329	0.000584752	Up
P17900	GM2A	3.531	0.00163594	Up
P61952	GNG11	0.389	0.00807743	Down
P09211	GSTP1	1.965	5.33939e-06	Up
P49773	HINT1	1.628	0.0061093	Up
O14979	HNRNPDL	1.501	0.0131363	Up
P52597	HNRNPF	2.162	0.00246052	Up
P08238	HSP90AB1	1.593	0.000151338	Up
P61604	HSPE1	1.949	1.03497e-05	Up
Q16666	IFI16	2.054	0.000164172	Up
O14732	IMPA2	2.32	0.00838305	Up
P12268	IMPDH2	1.534	0.0152306	Up
P17275	JUNB	1.512	0.0294517	Up
P14923	JUP	1.93	0.0233618	Up
P60985	KRTDAP	3.919	0.00167495	Up
O00515	LAD1	1.839	0.00390178	Up
Q08380	LGALS3BP	1.722	0.015869	Up
Q32MZ4	LRRFIP1	0.425	0.0170294	Down
P51884	LUM	0.468	0.0428091	Down
Q14210	LY6D	4.457	2.79436e-05	Up
O95274	LYPD3	2.762	0.000267871	Up
P33908	MAN1A1	0.58	0.00352959	Down
P29966	MARCKS	0.41	0.0493236	Down
Q9NR56	MBNL1	1.511	0.0138584	Up
P55083	MFAP4	0.472	0.00303339	Down
P52815	MRPL12	2.439	0.0327943	Up
P82930	MRPS34	1.69	0.0285085	Up
P20591	MX1	4.237	0.000535398	Up
Q9NR99	MXRA5	0.417	0.0220369	Down
Q13765	NACA	2.23	0.00143013	Up
P19338	NCL	1.536	0.00160487	Up
Q14938	NFIX	0.622	0.0379255	Down
Q9NX24	NHP2	0.506	0.0362547	Down
P15531	NME1	1.591	0.00526347	Up
P21589	NT5E	0.441	0.0250415	Down
Q9UQ80	PA2G4	1.685	0.00138307	Up
P11940	PABPC1	2.852	0.000130181	Up
P51003	PAPOLA	1.781	0.000789856	Up
Q15366	PCBP2	1.64	0.0395892	Up
Q13442	PDAP1	0.646	0.00757052	Down
O00151	PDLIM1	1.695	0.00213433	Up
Q99471	PFDN5	2.184	0.0228349	Up
Q13835	PKP1	2.003	0.011099	Up
Q9Y446	PKP3	1.873	0.0155978	Up
Q8TD55	PLEKHO2	0.581	0.0385814	Down
P62875	POLR2L	1.556	0.00217967	Up
Q15181	PPA1	1.656	9.48473e-05	Up
P62136	PPP1CA	1.602	0.00476004	Up
P25788	PSMA3	0.404	0.00714841	Down
O14818	PSMA7	1.738	0.0104334	Up
P62195	PSMC5	1.528	0.00242049	Up
P51665	PSMD7	1.851	0.00677753	Up
O95758	PTBP3	1.817	0.0470078	Up
Q9ULZ3	PYCARD	1.714	0.00211598	Up
P54727	RAD23B	0.545	0.00796878	Down
P62826	RAN	1.949	0.00417379	Up
P98179	RBM3	1.816	0.0108135	Up
Q14498	RBM39	1.555	0.00925178	Up
O75116	ROCK2	0.622	0.0373469	Down
P62906	RPL10A	1.728	0.0390129	Up
P62913	RPL11	1.692	0.00126187	Up
P30050	RPL12	1.964	0.00568608	Up
P40429	RPL13A	2.026	0.00246055	Up
P61313	RPL15	1.556	0.0233077	Up
Q07020	RPL18	1.509	0.029068	Up
P84098	RPL19	1.64	0.0063535	Up
P62829	RPL23	1.805	0.0137299	Up
P62750	RPL23A	1.957	0.000868822	Up
P83731	RPL24	1.657	0.00427533	Up
P61353	RPL27	1.961	0.000619828	Up
P46776	RPL27A	1.872	0.0077076	Up
P39023	RPL3	2.051	0.00429853	Up
P62888	RPL30	1.843	0.0331362	Up
P18077	RPL35A	1.761	0.0194262	Up
P63173	RPL38	1.783	0.0243035	Up
Q02878	RPL6	1.929	0.000537482	Up
P05388	RPLP0	1.894	0.0102285	Up
P05387	RPLP2	1.769	0.0076857	Up
P62277	RPS13	1.623	0.00146839	Up
P62244	RPS15A	1.64	0.00659241	Up
P62249	RPS16	1.627	0.020052	Up
P39019	RPS19	2.241	0.000598623	Up
P15880	RPS2	2.122	0.000506313	Up
P60866	RPS20	1.686	0.00585849	Up
P63220	RPS21	2.242	0.00069679	Up
P62847	RPS24	1.722	0.00985657	Up
P62857	RPS28	1.955	0.0134854	Up
P62273	RPS29	2.112	0.00753405	Up
P46782	RPS5	1.883	0.00180179	Up
P62081	RPS7	2.1	0.00016918	Up
P62241	RPS8	0.222	0.0188893	Down
O76021	RSL1D1	1.873	0.0170679	Up
Q9HCY8	S100A14	2.883	0.00056939	Up
Q96FQ6	S100A16	1.687	0.0131624	Up
P31151	S100A7	19.269	1.05405e-07	Up
P05109	S100A8	6.59	4.79387e-06	Up
P06702	S100A9	7.549	2.61377e-06	Up
Q6UWP8	SBSN	1.578	0.0433018	Up
Q9BRK5	SDF4	2.17	0.00759678	Up
Q8NC51	SERBP1	1.702	0.0407007	Up
P48594	SERPINB4	5.488	0.00320195	Up
P36952	SERPINB5	1.877	0.014436	Up
P05155	SERPING1	0.508	0.00345487	Down
P31947	SFN	2.173	7.94675e-06	Up
P05141	SLC25A5	1.785	0.0174478	Up
Q92922	SMARCC1	1.909	0.0319962	Up
P04179	SOD2	1.537	0.0259927	Up
P40763	STAT3	1.699	3.84919e-05	Up
P27105	STOM	0.356	0.00949111	Down
Q8WXH0	SYNE2	0.634	0.0305114	Down
P37802	TAGLN2	1.604	0.00384014	Up
Q9NYB0	TERF2IP	0.575	0.00708058	Down
Q9Y5J9	TIMM8B	2.113	0.000239276	Up
Q9H330	TMEM245	0.299	0.0122707	Down
Q9NWC5	TMEM45A	5.121	0.00342266	Up
P60174	TPI1	1.645	0.00638503	Up
P09493	TPM1	0.592	0.00420581	Down
Q14134	TRIM29	1.932	0.00866405	Up
Q9BRA2	TXNDC17	2.865	0.000108176	Up
P19971	TYMP	1.591	0.0081398	Up
O15042	U2SURP	1.658	0.010675	Up
Q9UMX0	UBQLN1	2.459	0.000191972	Up
P13611	VCAN	0.483	0.0108978	Down
P31946	YWHAB	2.072	0.00019337	Up
P63104	YWHAZ	1.508	0.00115531	Up
