# Supplementary material for: Generating detailed intercellular communication patterns in psoriasis at the single-cell level using social networking, pattern recognition, and manifold learning methods to optimize treatment strategies
Source: Aging (Albany NY). 2024 Jan 29;16(3):2194–231. doi: 10.18632/aging.205478 (PMC10911347; doi:10.18632/aging.205478)
Supplement: Supplementary Table 9 [file aging-16-205478-s010.xlsx]

## Sheet: Supplementary Table 9
Supplementary Table 9. Target genes of cell type specific regulons (CTSRs) overlap highly with proteins detected in psoriatic and healthy skin pathological areas.
Protein accession	Gene name
P01023	A2M
O14639	ABLIM1
P63261	ACTG1
P61160	ACTR2
P61158	ACTR3
Q8IUX7	AEBP1
P23526	AHCY
O43865	AHCYL1
Q09666	AHNAK
P54819	AK2
Q12802	AKAP13
O60218	AKR1B10
P05091	ALDH2
P51648	ALDH3A2
P04075	ALDOA
Q9UKU9	ANGPTL2
Q92688	ANP32B
P04083	ANXA1
P07355	ANXA2
P08758	ANXA5
P53680	AP2S1
P05067	APP
P07741	APRT
Q92482	AQP3
Q8N392	ARHGAP18
P52565	ARHGDIA
Q9NVJ2	ARL8B
O15144	ARPC2
O15511	ARPC5
Q9BPX5	ARPC5L
P05023	ATP1A1
P54709	ATP1B3
P16615	ATP2A2
Q16864	ATP6V1F
O75348	ATP6V1G1
Q99933	BAG1
O95817	BAG3
Q9UQB8	BAIAP2
P51572	BCAP31
Q8TD16	BICD2
Q8WUW1	BRK1
P20290	BTF3
P09871	C1S
Q5T0Z8	C6orf132
Q05682	CALD1
P0DP23	CALM1
P27482	CALML3
P27797	CALR
O43852	CALU
Q01518	CAP1
P40121	CAPG
P07384	CAPN1
Q14444	CAPRIN1
P47756	CAPZB
P20810	CAST
Q03135	CAV1
P16152	CBR1
Q8IX12	CCAR1
Q96A33	CCDC47
Q8IVM0	CCDC50
Q76M96	CCDC80
P78371	CCT2
P49368	CCT3
P48643	CCT5
P40227	CCT6A
P50990	CCT8
P16070	CD44
P13987	CD59
P08962	CD63
P04233	CD74
P60033	CD81
P27701	CD82
P21926	CD9
Q9NPY3	CD93
P14209	CD99
P60953	CDC42
P12830	CDH1
P55287	CDH11
P49716	CEBPD
P08603	CFH
P23528	CFL1
Q9Y6H1	CHCHD2
Q14839	CHD4
O43633	CHMP2A
Q14011	CIRBP
Q07065	CKAP4
Q9UQC9	CLCA2
Q9Y696	CLIC4
P09496	CLTA
P09497	CLTB
P10909	CLU
O75153	CLUH
P62633	CNBP
Q15417	CNN3
P39059	COL15A1
P39060	COL18A1
P02452	COL1A1
P08123	COL1A2
P02461	COL3A1
P02462	COL4A1
P20908	COL5A1
P05997	COL5A2
P12109	COL6A1
P12110	COL6A2
P12111	COL6A3
Q7L5N1	COPS6
P13073	COX4I1
P20674	COX5A
P10606	COX5B
P14854	COX6B1
P09669	COX6C
P14406	COX7A2
P15954	COX7C
P15088	CPA3
O75976	CPD
P29373	CRABP2
O75718	CRTAP
O75534	CSDE1
P48729	CSNK1A1
P01034	CST3
P01040	CSTA
P04080	CSTB
P35221	CTNNA1
P35222	CTNNB1
Q6PD62	CTR9
P07339	CTSD
P08311	CTSG
P43235	CTSK
P00167	CYB5A
P00387	CYB5R3
Q53TN4	CYBRD1
P08574	CYC1
P99999	CYCS
P98082	DAB2
P61803	DAD1
P07108	DBI
P07585	DCN
O75935	DCTN3
Q92499	DDX1
Q92841	DDX17
Q9NR30	DDX21
O00571	DDX3X
P17844	DDX5
O15121	DEGS1
P35659	DEK
Q15392	DHCR24
O60610	DIAPH1
P31689	DNAJA1
P25685	DNAJB1
Q5QJE6	DNTTIP2
Q14195	DPYSL3
Q14919	DRAP1
Q02487	DSC2
Q14574	DSC3
Q02413	DSG1
P32926	DSG3
P15924	DSP
P60981	DSTN
Q14204	DYNC1H1
P63167	DYNLL1
Q99848	EBNA1BP2
P30084	ECHS1
O60869	EDF1
Q15075	EEA1
P68104	EEF1A1
P13639	EEF2
P00533	EGFR
O14681	EI24
P41567	EIF1
P05198	EIF2S1
P20042	EIF2S2
Q14152	EIF3A
P55884	EIF3B
O15371	EIF3D
P60228	EIF3E
O15372	EIF3H
Q13347	EIF3I
O75822	EIF3J
Q9Y262	EIF3L
Q7L2H7	EIF3M
P60842	EIF4A1
P38919	EIF4A3
P23588	EIF4B
Q04637	EIF4G1
P78344	EIF4G2
P55010	EIF5
O60841	EIF5B
P56537	EIF6
Q8N8S7	ENAH
P17813	ENG
P06733	ENO1
O43768	ENSA
O43491	EPB41L2
Q6NXG1	ESRP1
P62495	ETF1
P15311	EZR
Q8IWE2	FAM114A1
Q96A26	FAM162A
P62861	FAU
P23142	FBLN1
P98095	FBLN2
P35555	FBN1
P14324	FDPS
Q14512	FGFBP1
P21333	FLNA
Q06828	FMOD
Q12841	FSTL1
P02794	FTH1
P02792	FTL
P35637	FUS
Q13283	G3BP1
P04406	GAPDH
P32456	GBP2
P50395	GDI2
O75223	GGCT
Q9H3K2	GHITM
P17302	GJA1
Q92896	GLG1
Q04760	GLO1
Q9NZD2	GLTP
P15104	GLUL
P17900	GM2A
P30679	GNA15
P04899	GNAI2
P62873	GNB1
P61952	GNG11
Q9UBI6	GNG12
P63218	GNG5
Q13439	GOLGA4
P00505	GOT2
Q14956	GPNMB
P36969	GPX4
P28799	GRN
P06396	GSN
P15170	GSPT1
P09211	GSTP1
Q16774	GUK1
P40939	HADHA
P51858	HDGF
Q00341	HDLBP
Q9Y5Z4	HEBP2
P49773	HINT1
P19367	HK1
P17096	HMGA1
Q01581	HMGCS1
P22626	HNRNPA2B1
Q99729	HNRNPAB
P07910	HNRNPC
Q14103	HNRNPD
O14979	HNRNPDL
P52597	HNRNPF
P61978	HNRNPK
P52272	HNRNPM
Q00839	HNRNPU
Q99714	HSD17B10
P07900	HSP90AA1
P08238	HSP90AB1
P14625	HSP90B1
P34932	HSPA4
O95757	HSPA4L
P11021	HSPA5
P11142	HSPA8
P38646	HSPA9
P04792	HSPB1
P10809	HSPD1
P61604	HSPE1
P98160	HSPG2
Q92598	HSPH1
Q92743	HTRA1
P48735	IDH2
Q13907	IDI1
Q16666	IFI16
Q01628	IFITM3
P22692	IGFBP4
Q16270	IGFBP7
P40189	IL6ST
Q12905	ILF2
O14732	IMPA2
P12268	IMPDH2
P46940	IQGAP1
P08648	ITGA5
P23229	ITGA6
P05556	ITGB1
P18084	ITGB5
Q9Y287	ITM2B
P17275	JUNB
P17535	JUND
P14923	JUP
Q07666	KHDRBS1
Q13887	KLF5
Q14974	KPNB1
P04264	KRT1
P60985	KRTDAP
Q86UP2	KTN1
O00515	LAD1
Q16363	LAMA4
P07942	LAMB1
P11047	LAMC1
P11279	LAMP1
P13473	LAMP2
P09382	LGALS1
P17931	LGALS3
Q08380	LGALS3BP
Q92633	LPAR1
Q07954	LRP1
Q32MZ4	LRRFIP1
Q14766	LTBP1
P51884	LUM
Q14210	LY6D
O95274	LYPD3
Q9UPN3	MACF1
Q969L2	MAL2
P33908	MAN1A1
P27816	MAP4
Q3KQU3	MAP7D1
O15264	MAPK13
P29966	MARCKS
P43243	MATR3
Q9UBB5	MBD2
Q9NR56	MBNL1
Q07820	MCL1
P40926	MDH2
P53582	METAP1
P50579	METAP2
P55083	MFAP4
Q99685	MGLL
P08253	MMP2
O60487	MPZL2
P52815	MRPL12
Q9P0M9	MRPL27
P82930	MRPS34
Q15800	MSMO1
P26038	MSN
Q86UE4	MTDH
P20591	MX1
Q9NR99	MXRA5
P35579	MYH9
O14950	MYL12B
P60660	MYL6
Q6NZ67	MZT2B
Q9BXJ9	NAA15
Q9GZZ1	NAA50
Q13765	NACA
P54920	NAPA
Q9Y2A7	NCKAP1
P19338	NCL
Q92597	NDRG1
O95299	NDUFA10
Q9P0J0	NDUFA13
O00483	NDUFA4
O96000	NDUFB10
O95168	NDUFB4
P17568	NDUFB7
Q9Y6M9	NDUFB9
O43920	NDUFS5
O75380	NDUFS6
O75251	NDUFS7
P49821	NDUFV1
Q14938	NFIX
P25963	NFKBIA
Q9NX24	NHP2
P15531	NME1
P40261	NNMT
Q14978	NOLC1
Q9Y2X3	NOP58
P06748	NPM1
O14786	NRP1
O95478	NSA2
P21589	NT5E
Q9H1E3	NUCKS1
Q9NRN5	OLFML3
Q96CV9	OPTN
Q13438	OS9
Q9BZF1	OSBPL8
P07237	P4HB
Q9UQ80	PA2G4
P11940	PABPC1
P43034	PAFAH1B1
Q8WX93	PALLD
P51003	PAPOLA
Q99497	PARK7
Q15365	PCBP1
Q15366	PCBP2
Q15113	PCOLCE
Q13442	PDAP1
P09619	PDGFRB
P30101	PDIA3
Q15084	PDIA6
O00151	PDLIM1
Q15121	PEA15
P30086	PEBP1
Q96FX8	PERP
Q99471	PFDN5
P07737	PFN1
P00558	PGK1
O00264	PGRMC1
Q99623	PHB2
P14618	PKM
Q13835	PKP1
Q9Y446	PKP3
Q8TD55	PLEKHO2
O60664	PLIN3
Q04941	PLP2
P13797	PLS3
Q9BX97	PLVAP
Q9Y4D7	PLXND1
Q15126	PMVK
P0DPB6	POLR1D
P62875	POLR2L
Q15181	PPA1
P62937	PPIA
P23284	PPIB
Q13427	PPIG
O60437	PPL
P62136	PPP1CA
P62140	PPP1CB
Q08209	PPP3CA
Q06830	PRDX1
P30044	PRDX5
P04156	PRNP
O75400	PRPF40A
Q9Y520	PRRC2C
P54821	PRRX1
O75475	PSIP1
P25788	PSMA3
P25789	PSMA4
P60900	PSMA6
O14818	PSMA7
P20618	PSMB1
P28070	PSMB4
P28074	PSMB5
P28072	PSMB6
Q99436	PSMB7
P35998	PSMC2
P17980	PSMC3
P62195	PSMC5
Q99460	PSMD1
Q13200	PSMD2
P51665	PSMD7
P48556	PSMD8
P26599	PTBP1
O95758	PTBP3
Q15185	PTGES3
P06454	PTMA
Q12974	PTP4A2
P10586	PTPRF
Q9UHX1	PUF60
Q9ULZ3	PYCARD
P61026	RAB10
P62820	RAB1A
P57735	RAB25
Q13636	RAB31
Q9BZG1	RAB34
O95716	RAB3D
P51149	RAB7A
P63000	RAC1
O60216	RAD21
P54727	RAD23B
P62826	RAN
P46060	RANGAP1
P49756	RBM25
P98179	RBM3
Q14498	RBM39
Q00765	REEP5
P61586	RHOA
P08134	RHOC
O14730	RIOK3
O75116	ROCK2
P27635	RPL10
P62906	RPL10A
P62913	RPL11
P30050	RPL12
P26373	RPL13
P40429	RPL13A
P50914	RPL14
P61313	RPL15
Q07020	RPL18
P84098	RPL19
P35268	RPL22
P62829	RPL23
P62750	RPL23A
P83731	RPL24
P61254	RPL26
P61353	RPL27
P46776	RPL27A
P46779	RPL28
P47914	RPL29
P39023	RPL3
P62888	RPL30
P62899	RPL31
P62910	RPL32
P49207	RPL34
P42766	RPL35
P18077	RPL35A
Q9Y3U8	RPL36
Q969Q0	RPL36AL
P61513	RPL37A
P63173	RPL38
P62891	RPL39
P36578	RPL4
P46777	RPL5
Q02878	RPL6
P62917	RPL8
P05388	RPLP0
P05386	RPLP1
P05387	RPLP2
P04844	RPN2
P62280	RPS11
P25398	RPS12
P62277	RPS13
P62263	RPS14
P62841	RPS15
P62244	RPS15A
P62249	RPS16
P39019	RPS19
P15880	RPS2
P60866	RPS20
P63220	RPS21
P62266	RPS23
P62847	RPS24
P62979	RPS27A
P62857	RPS28
P62273	RPS29
P23396	RPS3
P46782	RPS5
P62753	RPS6
Q9UBS0	RPS6KB2
P62081	RPS7
P62241	RPS8
P08865	RPSA
Q9HB90	RRAGC
Q9P2E9	RRBP1
O76021	RSL1D1
Q9NQC3	RTN4
P60903	S100A10
P31949	S100A11
Q9HCY8	S100A14
Q96FQ6	S100A16
P26447	S100A4
P06703	S100A6
P31151	S100A7
P05109	S100A8
P06702	S100A9
O00422	SAP18
Q6UWP8	SBSN
P18827	SDC1
Q9BRK5	SDF4
O94979	SEC31A
P60468	SEC61B
Q99442	SEC62
Q8NC51	SERBP1
P84101	SERF2
P48594	SERPINB4
P36952	SERPINB5
P05155	SERPING1
Q01105	SET
O75533	SF3B1
P31947	SFN
P23246	SFPQ
Q96HF1	SFRP2
Q9H299	SH3BGRL3
Q9Y371	SH3GLB1
P63208	SKP1
Q8TF71	SLC16A10
Q00325	SLC25A3
P05141	SLC25A5
P12236	SLC25A6
P11166	SLC2A1
O75094	SLIT3
Q9H2G2	SLK
P03973	SLPI
Q92922	SMARCC1
P14678	SNRPB
P62316	SNRPD2
P62318	SNRPD3
Q9Y5X1	SNX9
P00441	SOD1
P04179	SOD2
P18583	SON
P09486	SPARC
Q9Y6A9	SPCS1
O43291	SPINT2
Q01082	SPTBN1
P10124	SRGN
P37108	SRP14
O76094	SRP72
Q05519	SRSF11
Q01130	SRSF2
P84103	SRSF3
P51571	SSR4
P42224	STAT1
P40763	STAT3
Q9Y6E0	STK24
P27105	STOM
P53999	SUB1
P53597	SUCLG1
Q9UH65	SWAP70
O60506	SYNCRIP
Q8WXH0	SYNE2
O43760	SYNGR2
O75410	TACC1
P09758	TACSTD2
Q15545	TAF7
P37802	TAGLN2
P37837	TALDO1
P17987	TCP1
Q9NYB0	TERF2IP
O43493	TGOLN2
P04216	THY1
Q9Y5L4	TIMM13
Q9Y5J9	TIMM8B
P01033	TIMP1
Q9HD45	TM9SF3
P55061	TMBIM6
Q9Y3Q3	TMED3
Q9BVK6	TMED9
Q9H330	TMEM245
Q9NWC5	TMEM45A
P62328	TMSB4X
Q9H0E2	TOLLIP
P60174	TPI1
P09493	TPM1
P06753	TPM3
P67936	TPM4
P12270	TPR
Q15661	TPSAB1
Q14134	TRIM29
Q9BQE3	TUBA1C
P68366	TUBA4A
Q13885	TUBB2A
P68371	TUBB4B
P49411	TUFM
P10599	TXN
Q9BRA2	TXNDC17
Q9H3M7	TXNIP
P19971	TYMP
O15042	U2SURP
P61086	UBE2K
Q9BZL1	UBL5
Q9UMX0	UBQLN1
Q04323	UBXN1
Q92575	UBXN4
Q9UDW1	UQCR10
P14927	UQCRB
P07919	UQCRH
O14949	UQCRQ
Q9Y4E8	USP15
Q96K76	USP47
P46939	UTRN
Q9BV40	VAMP8
P13611	VCAN
P55072	VCP
P21796	VDAC1
P08670	VIM
O75436	VPS26A
P04275	VWF
Q9BTA9	WAC
O75083	WDR1
Q9H4A3	WNK1
P13010	XRCC5
P12956	XRCC6
P16989	YBX3
Q96TA2	YME1L1
P31946	YWHAB
P61981	YWHAG
P27348	YWHAQ
P63104	YWHAZ
P25490	YY1
Q9HC78	ZBTB20
Q8WU90	ZC3H15
P26651	ZFP36
Q96JP5	ZFP91
O43670	ZNF207
Q96PM9	ZNF385A
